# Supplementary material for: Hypervalent iodine initiated intramolecular alkene dimerisation: a stereodivergent entry to cyclobutanes
Source: Royal Society of Chemistry journal article supplement (doi:10.1039/c9cc04383g), 2019-01-01

## Supporting Information

# Hypervalent iodine initiated intramolecular alkene dimerisation: a stereodivergent entry to cyclobutanes

**Yuxiang Zhu,<sup>a,†</sup> Ignacio Colomer<sup>a,†</sup> and Timothy J. Donohoe<sup>a</sup>**

*Department of Chemistry, University of Oxford, Chemistry Research Laboratory, Mansfield Road,  
Oxford, OX1 3TA (UK)*

E-mail: [timothy.donohoe@chem.ox.ac.uk](mailto:timothy.donohoe@chem.ox.ac.uk)

† These authors contributed equally.

## Table of Contents

|                                                                                   |     |
|-----------------------------------------------------------------------------------|-----|
| Compound ( <i>E</i> )-S1c: <sup>1</sup> H NMR and <sup>13</sup> C NMR             | S4  |
| Compound ( <i>E</i> )-1a: <sup>1</sup> H NMR and <sup>13</sup> C NMR              | S6  |
| Compound ( <i>E</i> )-1b: <sup>1</sup> H NMR and <sup>13</sup> C NMR              | S8  |
| Compound ( <i>E</i> )-1c: <sup>1</sup> H NMR and <sup>13</sup> C NMR              | S10 |
| Compound ( <i>E</i> )-1e: <sup>1</sup> H NMR and <sup>13</sup> C NMR              | S12 |
| Compound ( <i>E</i> )-1j: <sup>1</sup> H NMR and <sup>13</sup> C NMR              | S14 |
| Compound ( <i>E</i> )-1k: <sup>1</sup> H NMR and <sup>13</sup> C NMR              | S16 |
| Compound ( <i>E</i> )-1l: <sup>1</sup> H NMR and <sup>13</sup> C NMR              | S18 |
| Compound ( <i>E</i> )-1m: <sup>1</sup> H NMR and <sup>13</sup> C NMR              | S20 |
| Compound ( <i>E</i> )-1d: <sup>1</sup> H NMR and <sup>13</sup> C NMR              | S22 |
| Compound ( <i>E</i> )-1f: <sup>1</sup> H NMR and <sup>13</sup> C NMR              | S24 |
| Compound ( <i>E</i> )-1g: <sup>1</sup> H NMR and <sup>13</sup> C NMR              | S26 |
| Compound ( <i>E</i> )-1h: <sup>1</sup> H NMR and <sup>13</sup> C NMR              | S28 |
| Compound ( <i>E</i> )-1i: <sup>1</sup> H NMR and <sup>13</sup> C NMR              | S30 |
| Compound ( <i>E</i> )-1n: <sup>1</sup> H NMR and <sup>13</sup> C NMR              | S32 |
| Compound 4c: <sup>1</sup> H NMR and <sup>13</sup> C NMR                           | S34 |
| Compound 4d: <sup>1</sup> H NMR and <sup>13</sup> C NMR                           | S36 |
| Compound 4e: <sup>1</sup> H NMR and <sup>13</sup> C NMR                           | S38 |
| Compound 4g: <sup>1</sup> H NMR and <sup>13</sup> C NMR                           | S40 |
| Compound 2a: <sup>1</sup> H NMR and <sup>13</sup> C NMR                           | S42 |
| Compound 2b: <sup>1</sup> H NMR and <sup>13</sup> C NMR                           | S44 |
| Compound 2c: <sup>1</sup> H NMR and <sup>13</sup> C NMR                           | S46 |
| Compound 2d: <sup>1</sup> H NMR and <sup>13</sup> C NMR                           | S48 |
| Compounds 2e and 3e: <sup>1</sup> H NMR and <sup>13</sup> C NMR                   | S50 |
| Compound 2f: <sup>1</sup> H NMR and <sup>13</sup> C NMR                           | S52 |
| Compounds 2g:3g: <sup>1</sup> H NMR, <sup>13</sup> C NMR                          | S54 |
| Compounds 3h:3h: <sup>1</sup> H NMR, <sup>13</sup> C NMR, COSY, HSQC and NOESY-2D | S56 |
| Compounds 2i:3i: <sup>1</sup> H NMR and <sup>13</sup> C NMR                       | S61 |
| Compound 2j: <sup>1</sup> H NMR and <sup>13</sup> C NMR                           | S63 |
| Compound 3j: <sup>1</sup> H NMR and <sup>13</sup> C NMR                           | S65 |
| Compound 2k: <sup>1</sup> H NMR and <sup>13</sup> C NMR                           | S67 |
| Compound 3k: <sup>1</sup> H NMR and <sup>13</sup> C NMR, COSY, HSQC and NOESY-2D  | S69 |

|                                                                                        |      |
|----------------------------------------------------------------------------------------|------|
| Compound <b>2l:3l</b> : $^1\text{H}$ NMR and $^{13}\text{C}$ NMR                       | S74  |
| Compound <b>2m</b> : $^1\text{H}$ NMR and $^{13}\text{C}$ NMR                          | S76  |
| Compound <b>3m</b> : $^1\text{H}$ NMR and $^{13}\text{C}$ NMR                          | S78  |
| Compounds <b>2n:3n</b> : $^1\text{H}$ NMR and $^{13}\text{C}$ NMR                      | S80  |
| Compound <b>5c</b> : $^1\text{H}$ NMR and $^{13}\text{C}$ NMR                          | S82  |
| Compound <b>5d</b> : $^1\text{H}$ NMR and $^{13}\text{C}$ NMR                          | S84  |
| Compound <b>5e</b> : $^1\text{H}$ NMR and $^{13}\text{C}$ NMR                          | S86  |
| Compound <b>5g</b> : $^1\text{H}$ NMR and $^{13}\text{C}$ NMR, COSY, HSQC and NOESY-2D | S88  |
| Compound <b>6a</b> : $^1\text{H}$ NMR and $^{13}\text{C}$ NMR                          | S93  |
| Compound <b>6b</b> : $^1\text{H}$ NMR and $^{13}\text{C}$ NMR                          | S95  |
| Compound <b>7a</b> : $^1\text{H}$ NMR and $^{13}\text{C}$ NMR                          | S97  |
| Compound <b>8a</b> : $^1\text{H}$ NMR and $^{13}\text{C}$ NMR, COSY, HSQC and NOESY-2D | S99  |
| Compound <b>8b</b> : $^1\text{H}$ NMR and $^{13}\text{C}$ NMR                          | S104 |
| Compound <b>8c</b> : $^1\text{H}$ NMR and $^{13}\text{C}$ NMR, COSY, HSQC and NOESY-2D | S106 |
| Compound <b>8d</b> : $^1\text{H}$ NMR and $^{13}\text{C}$ NMR                          | S111 |

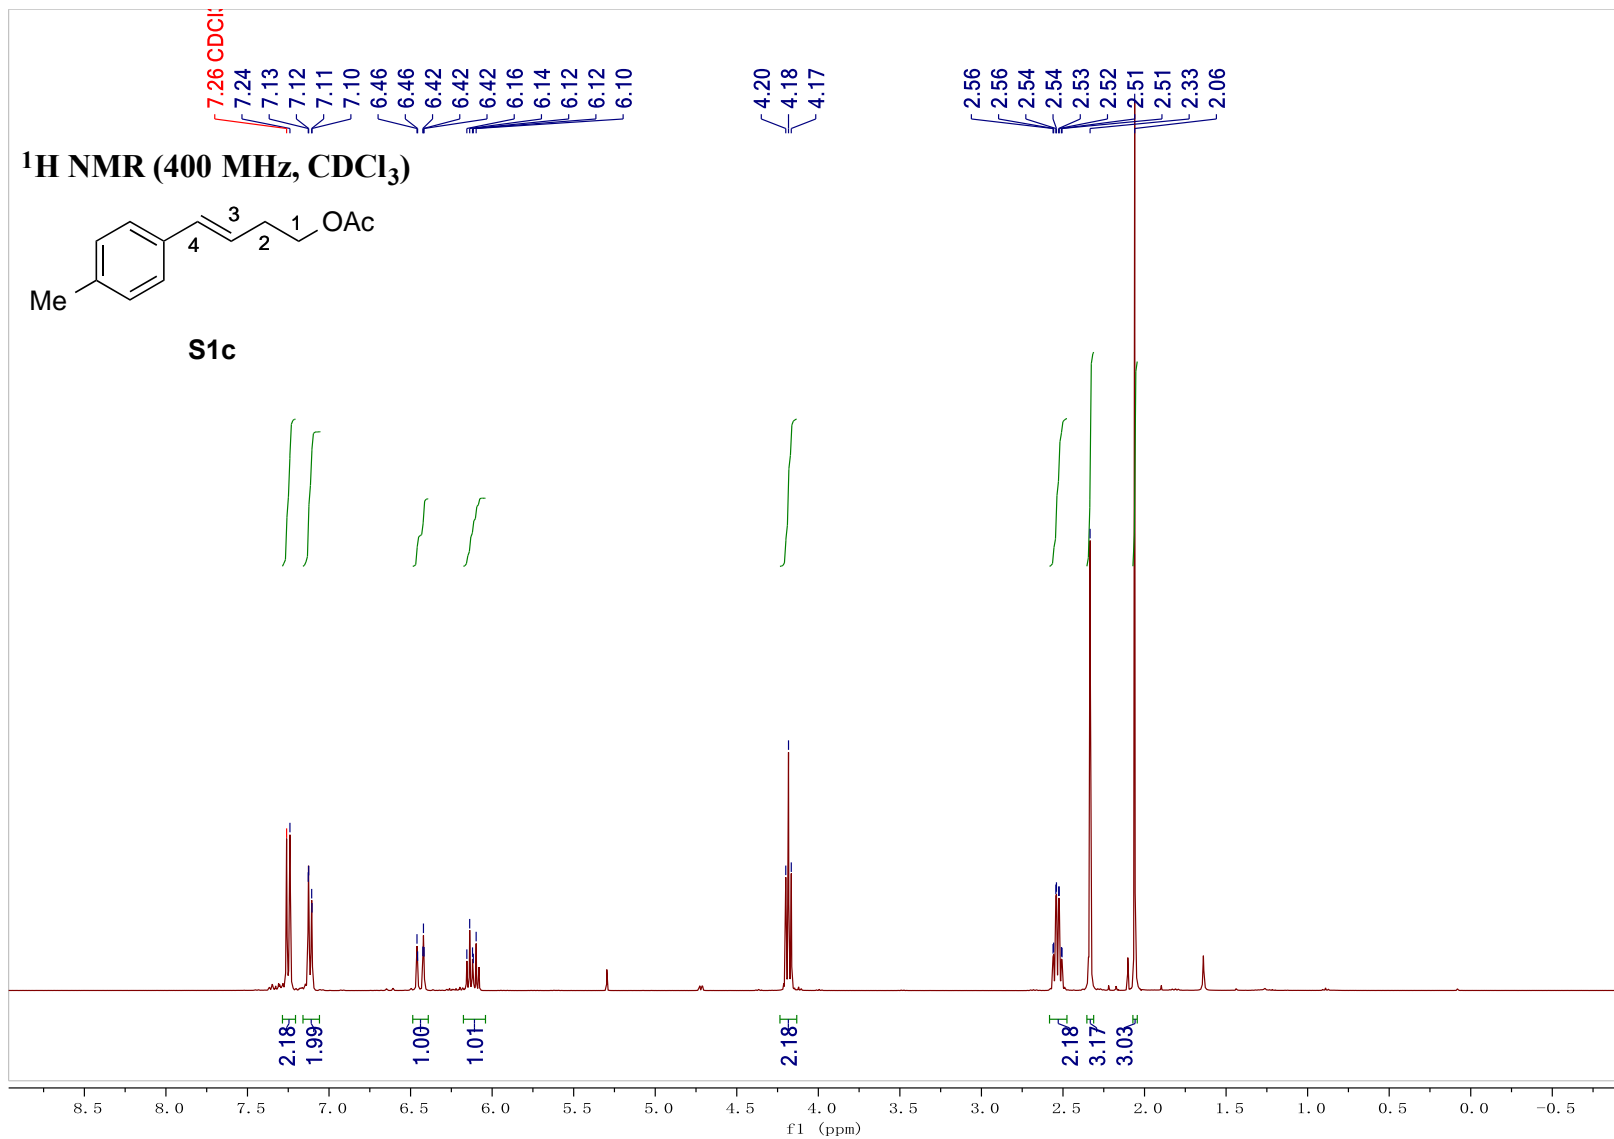



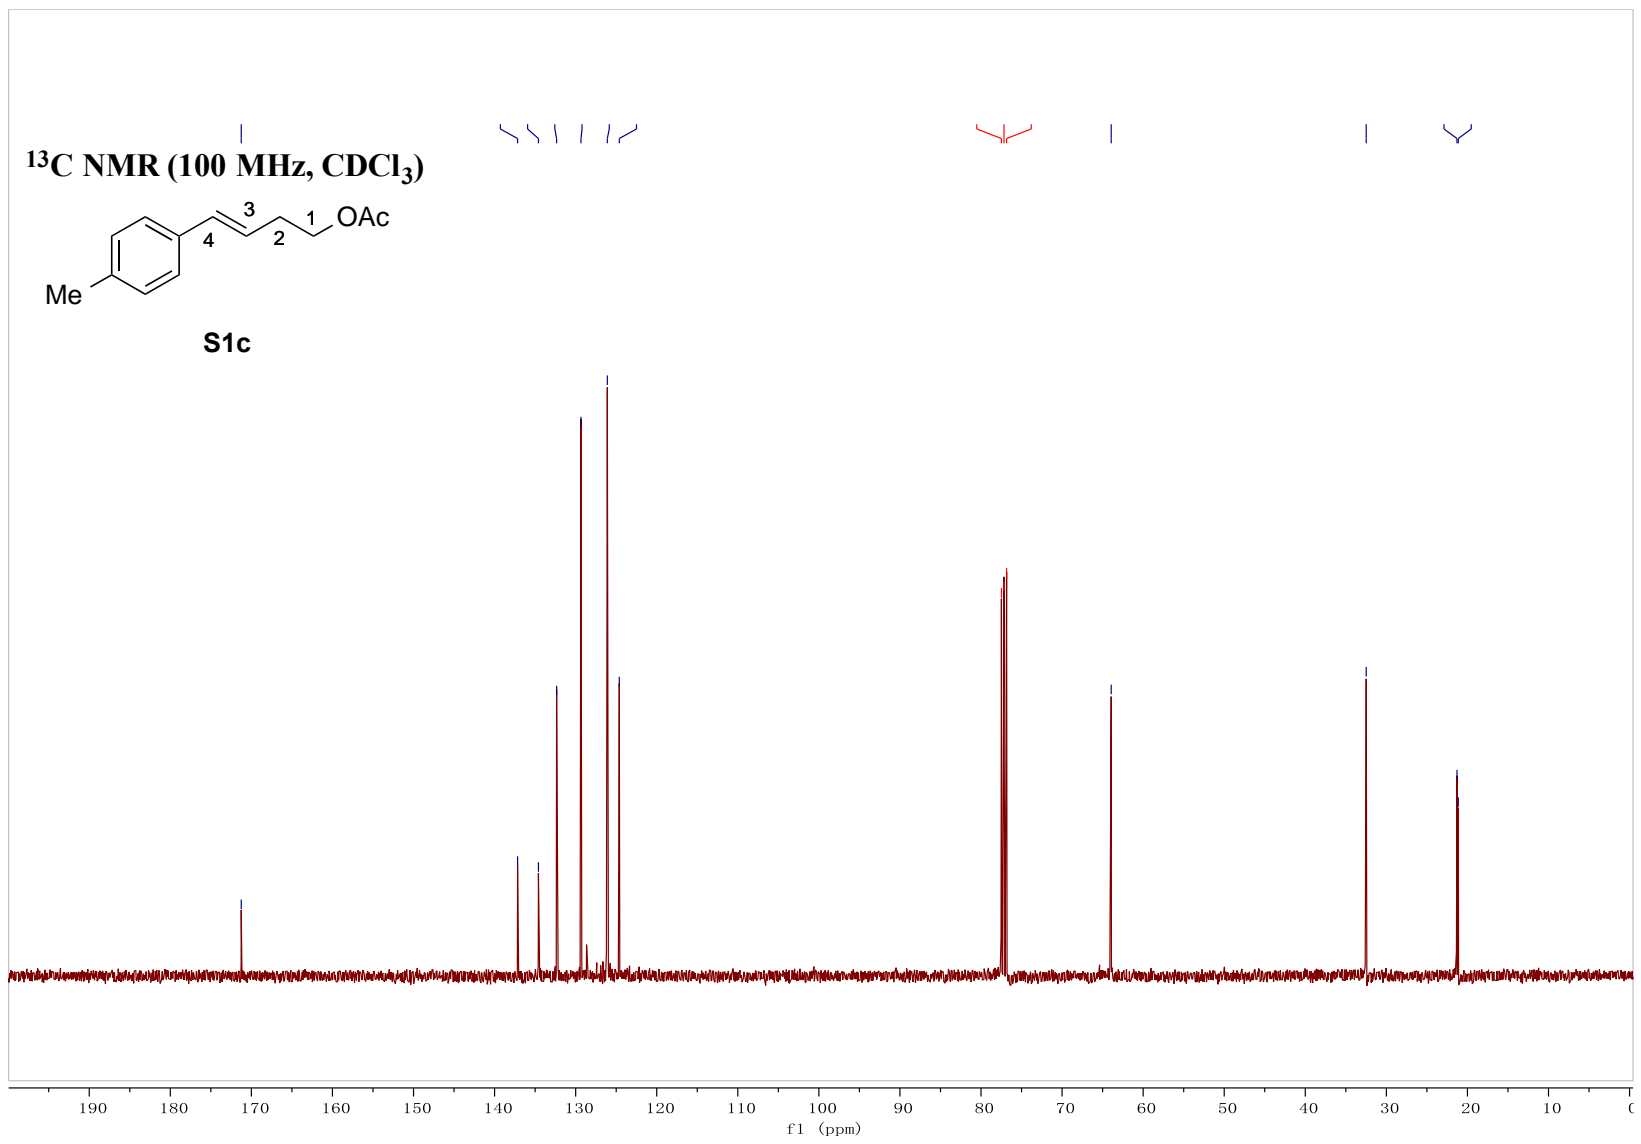

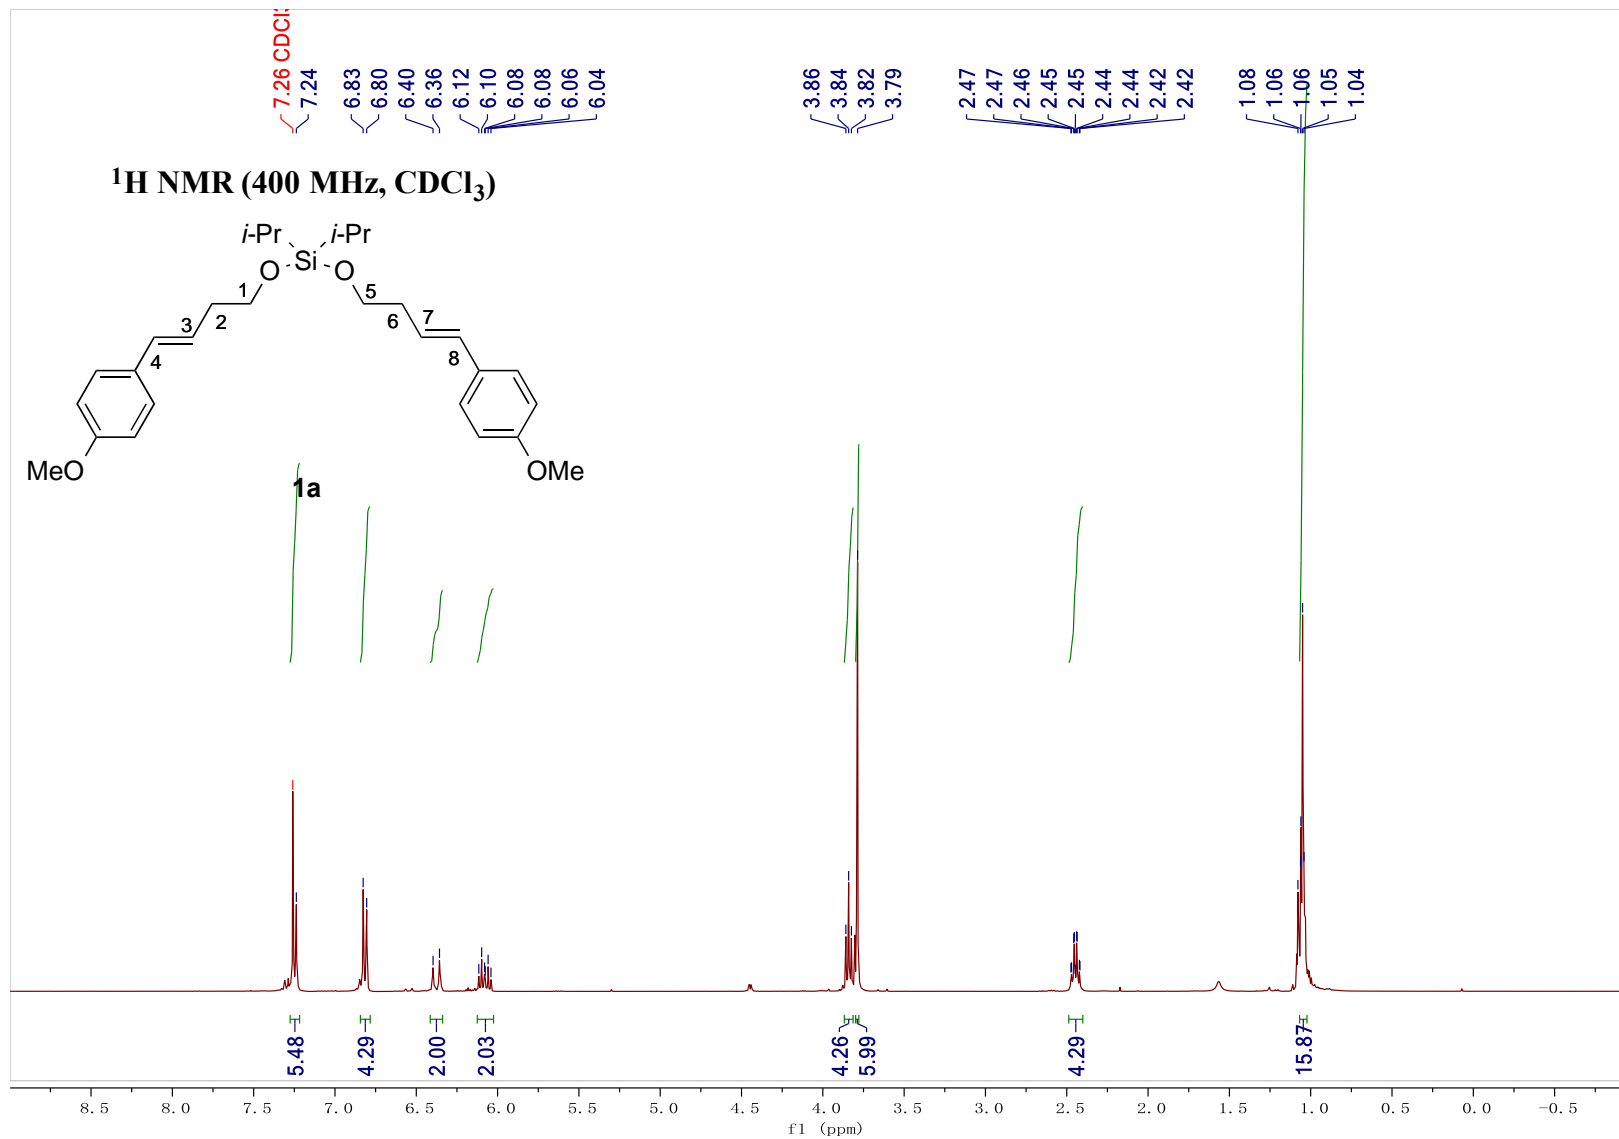

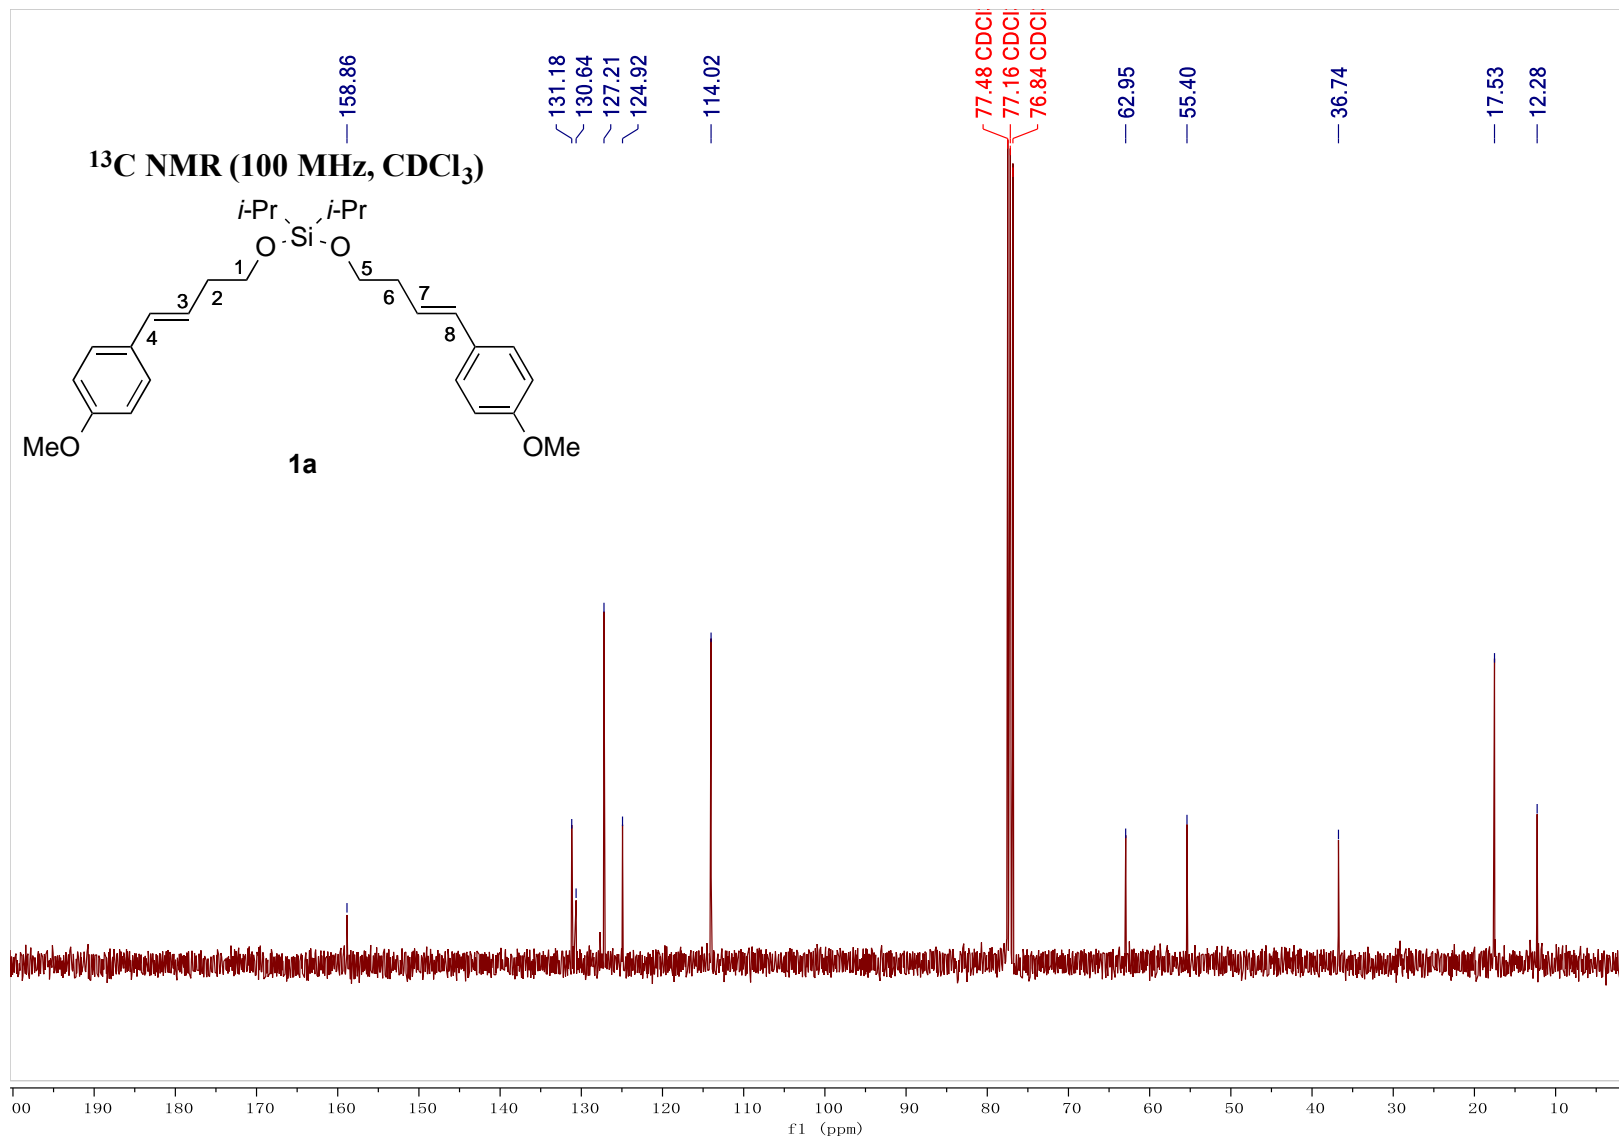

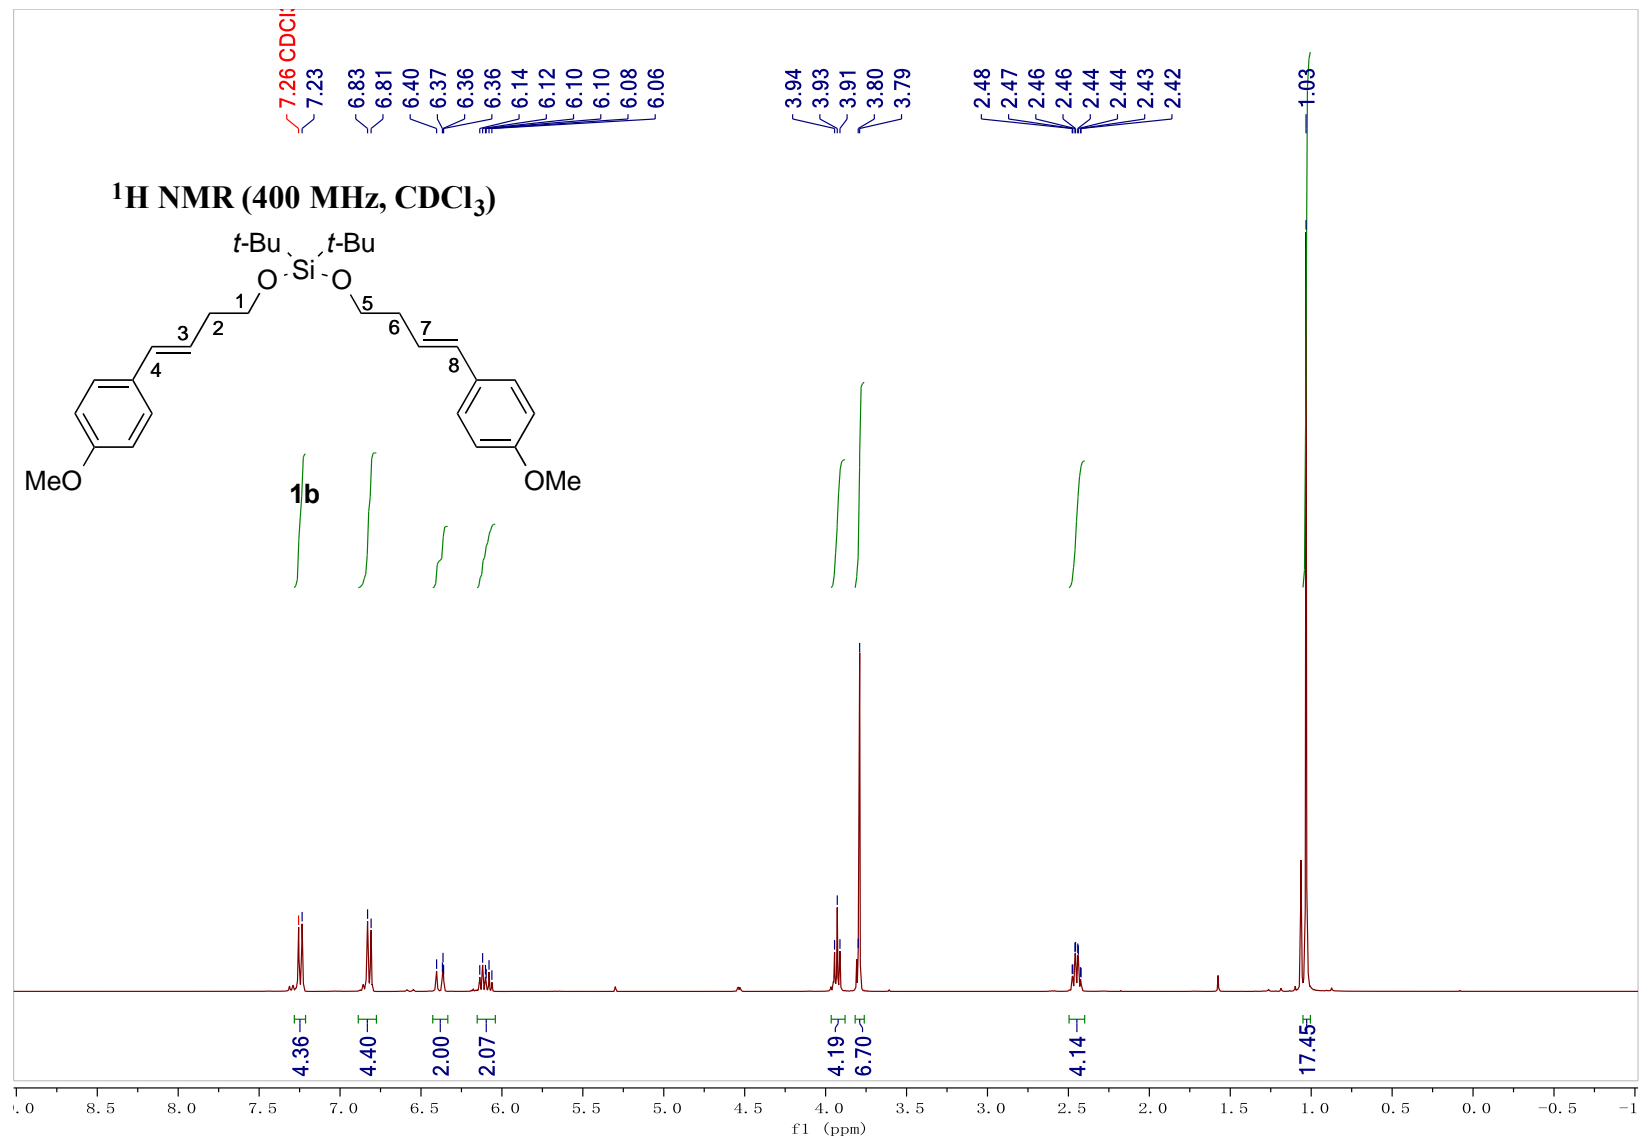

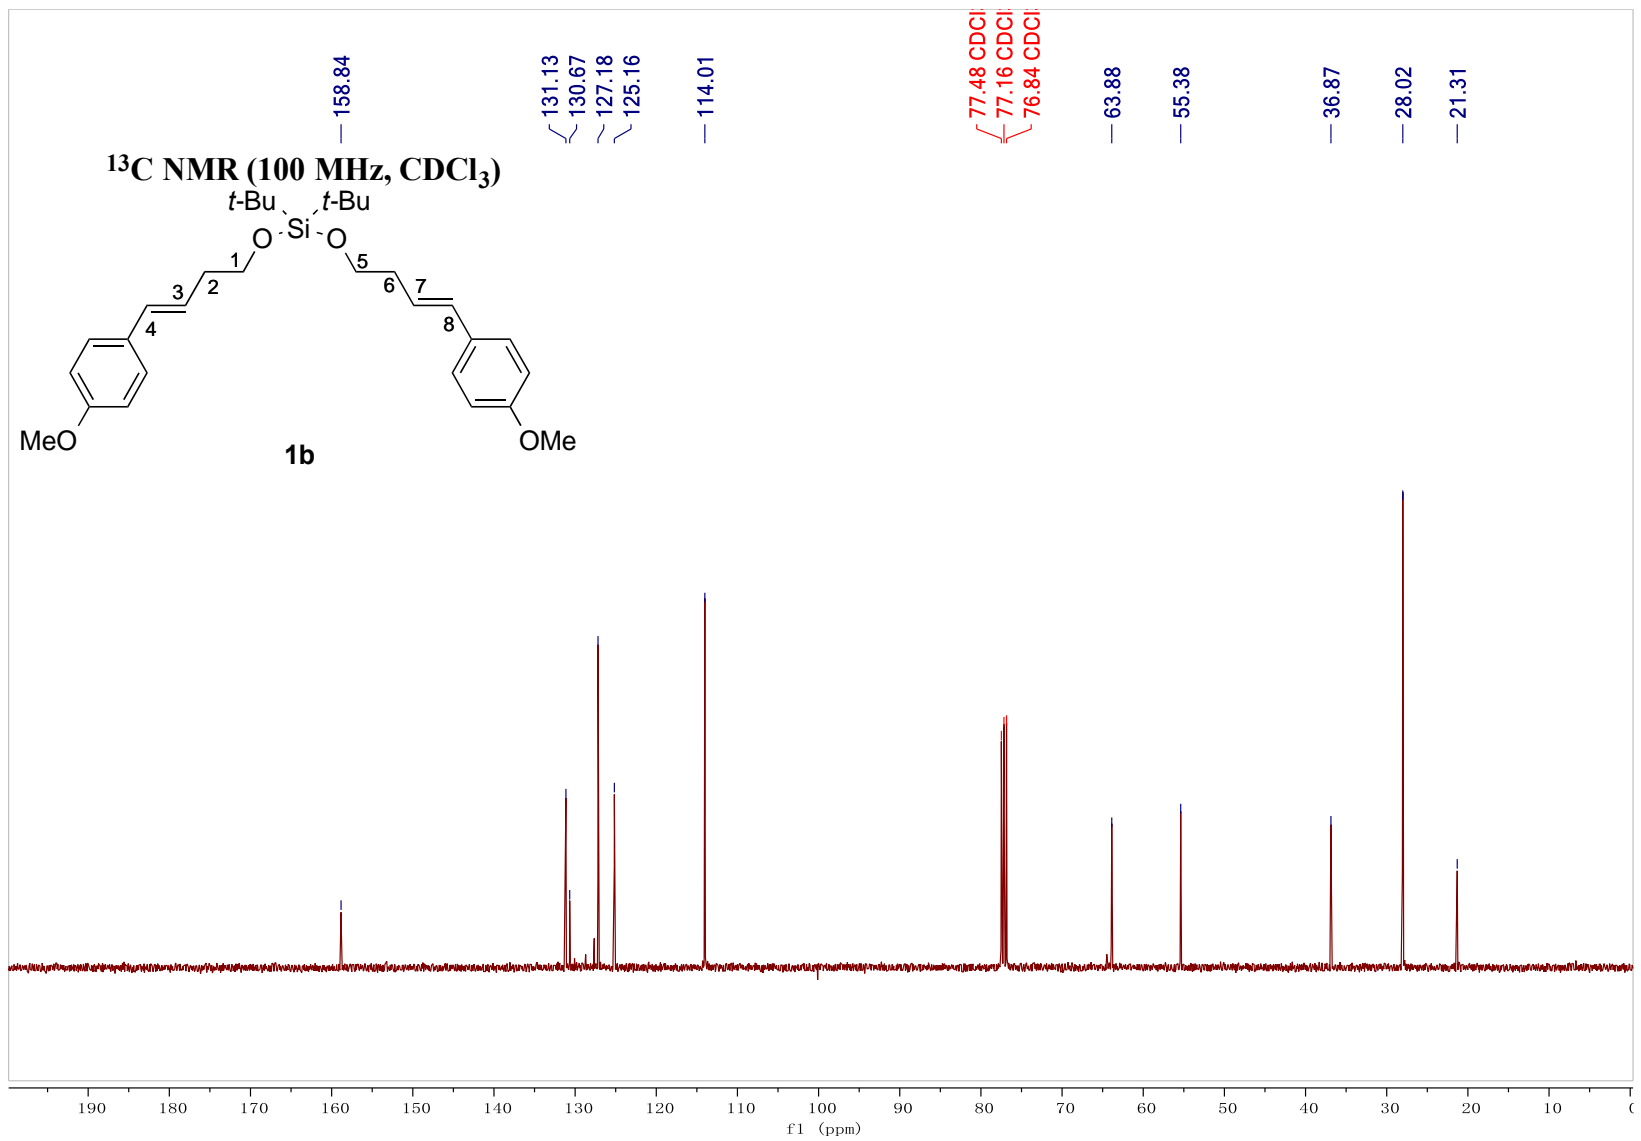

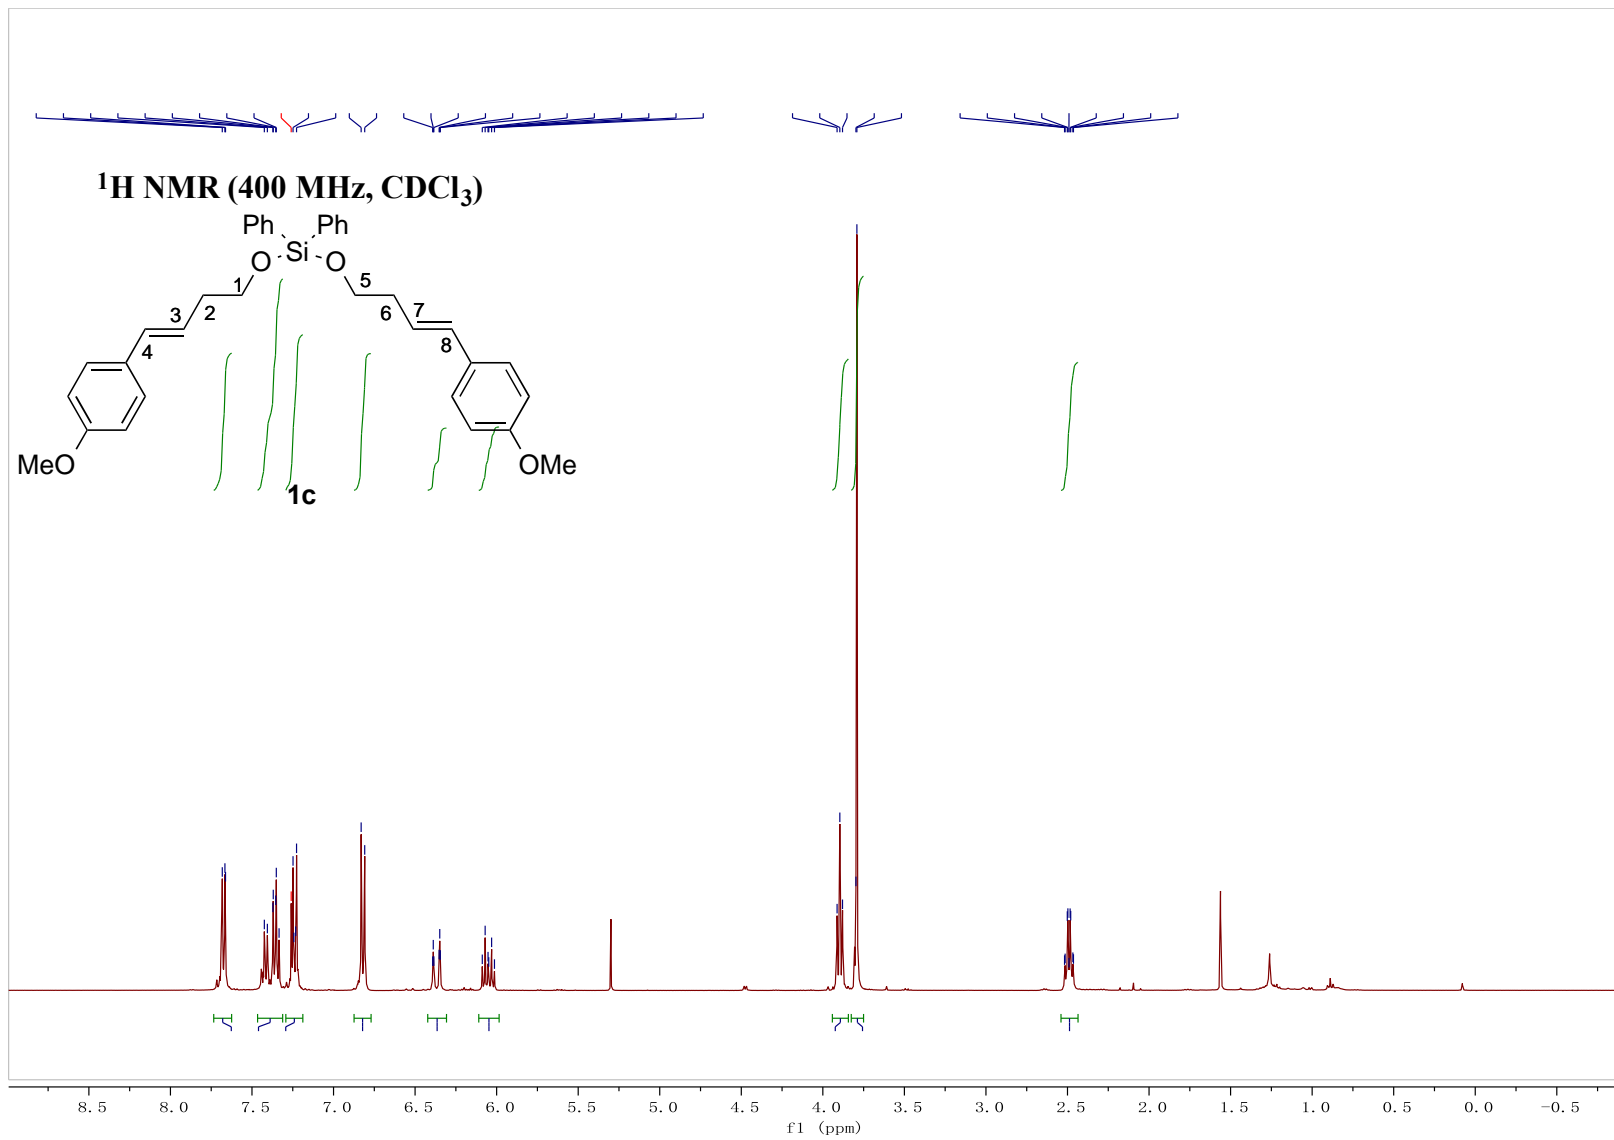

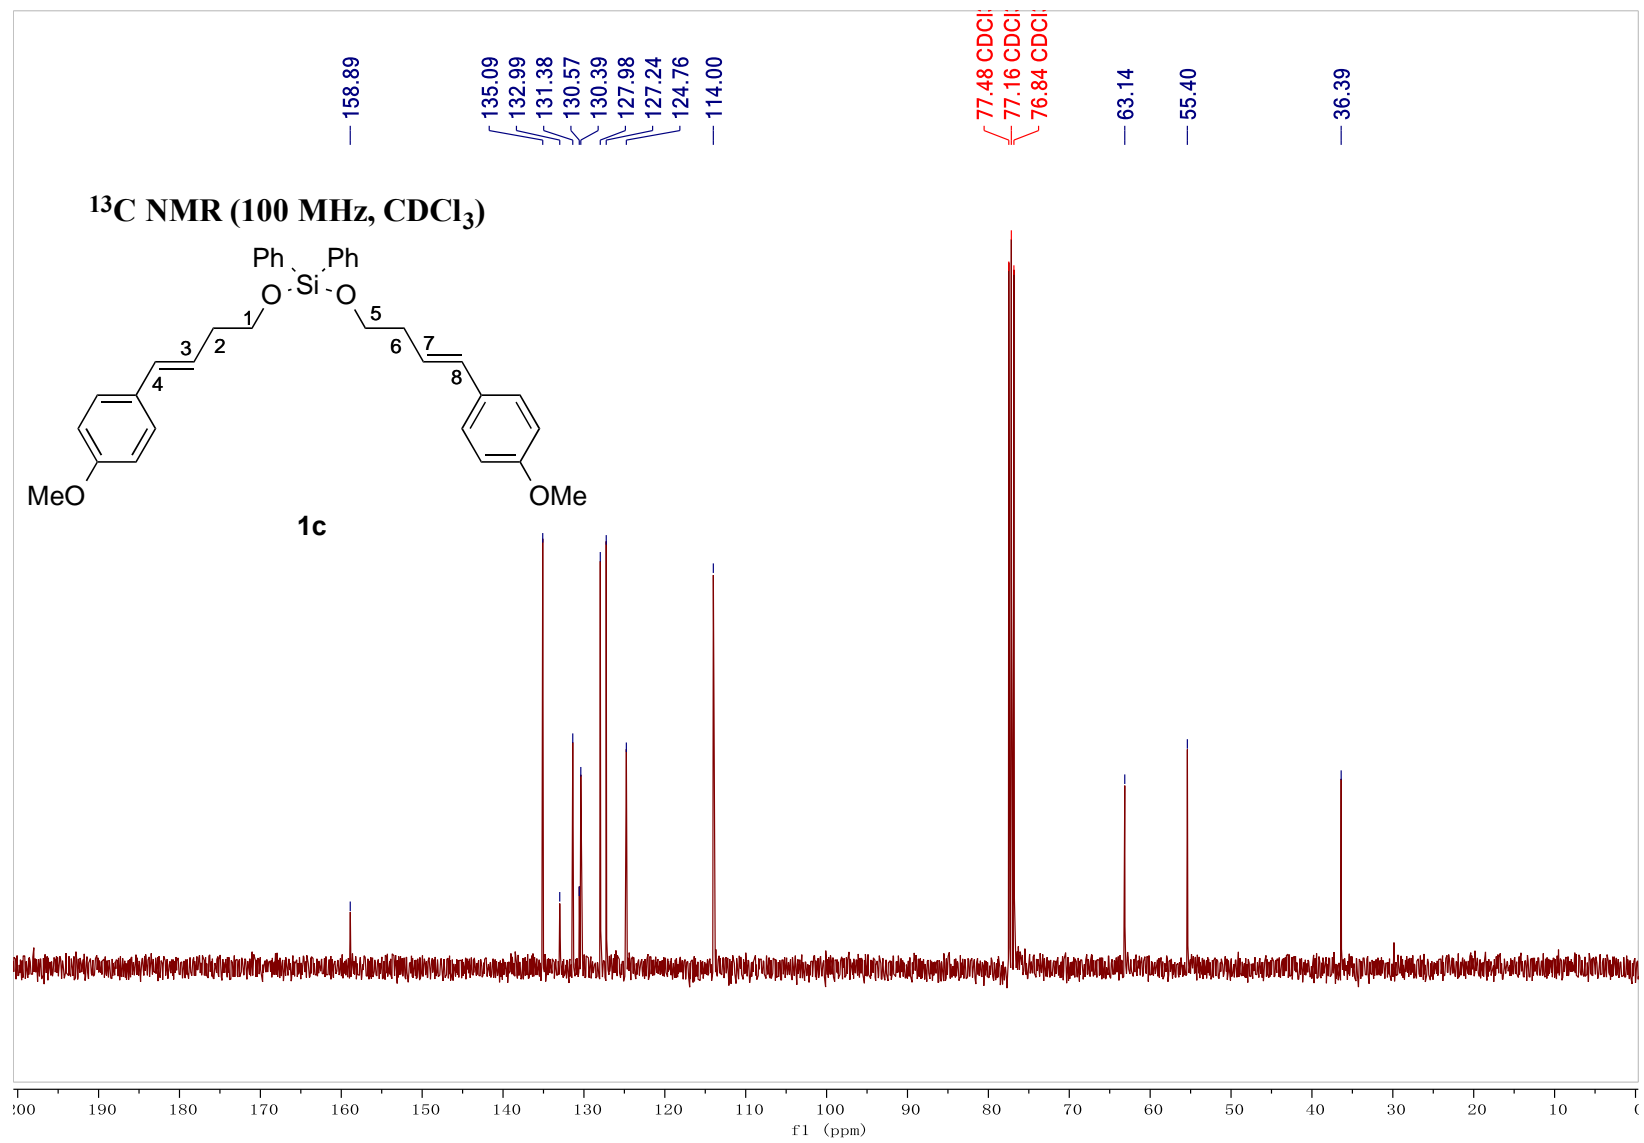

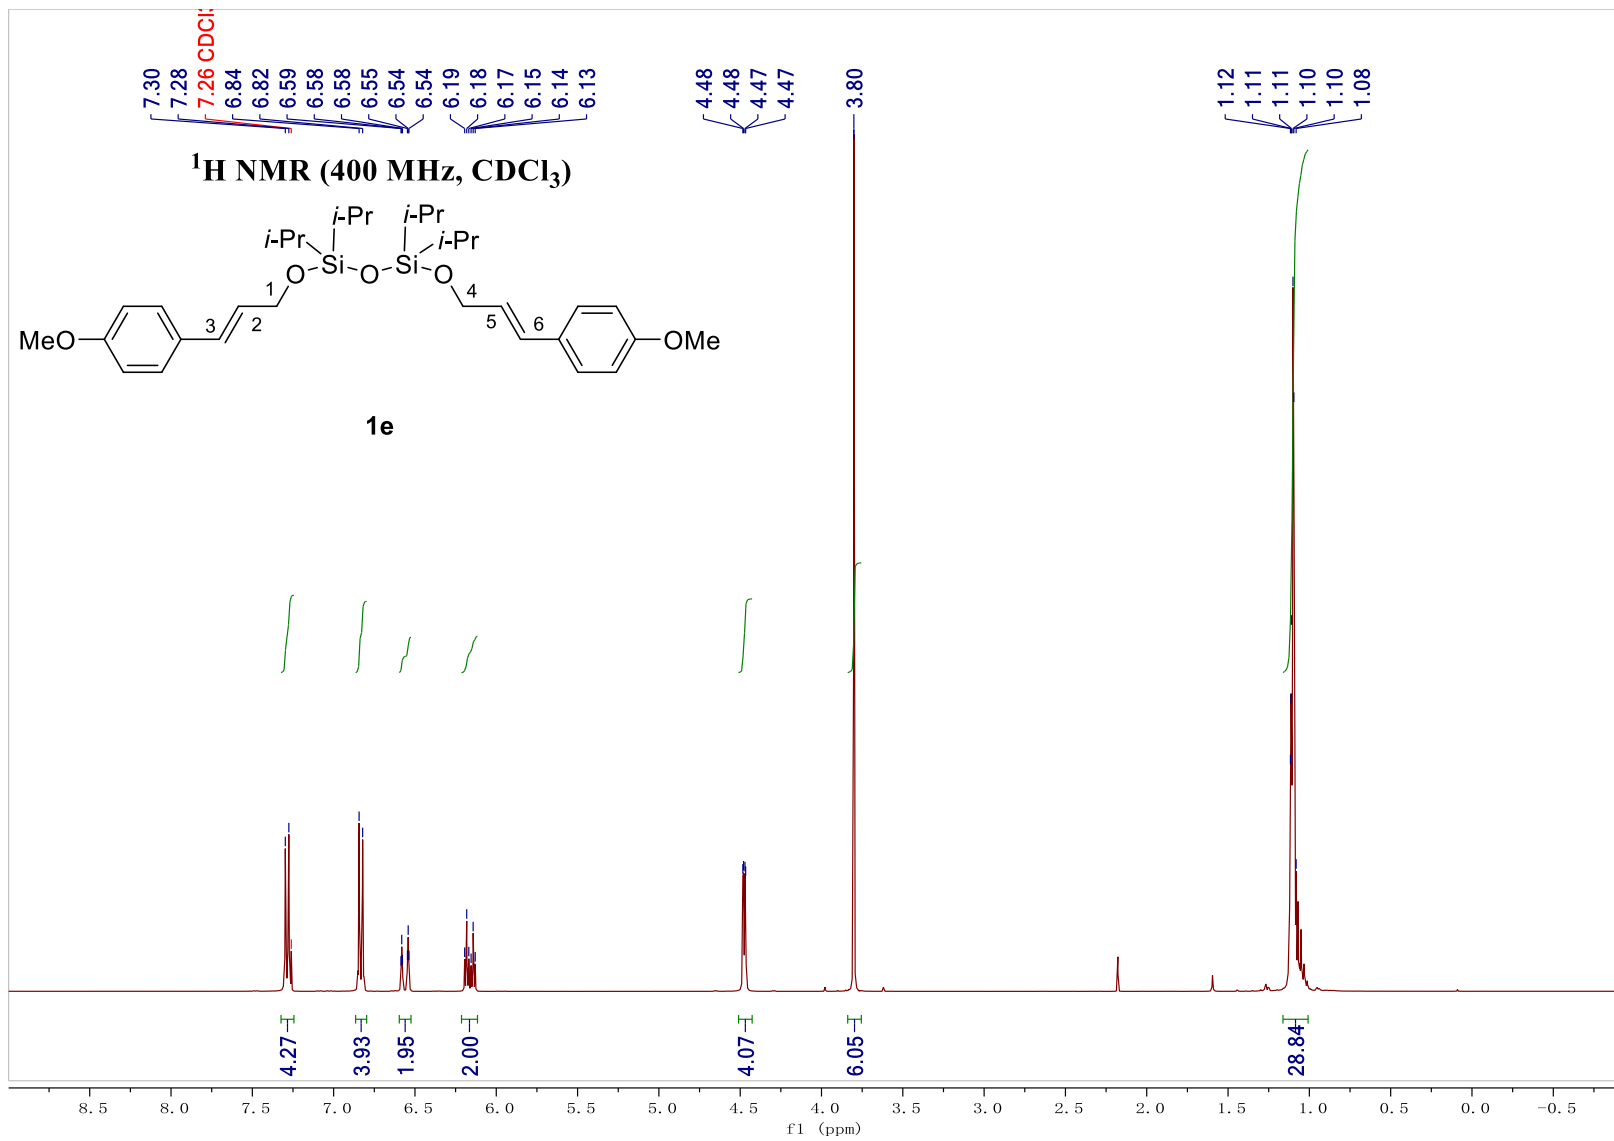



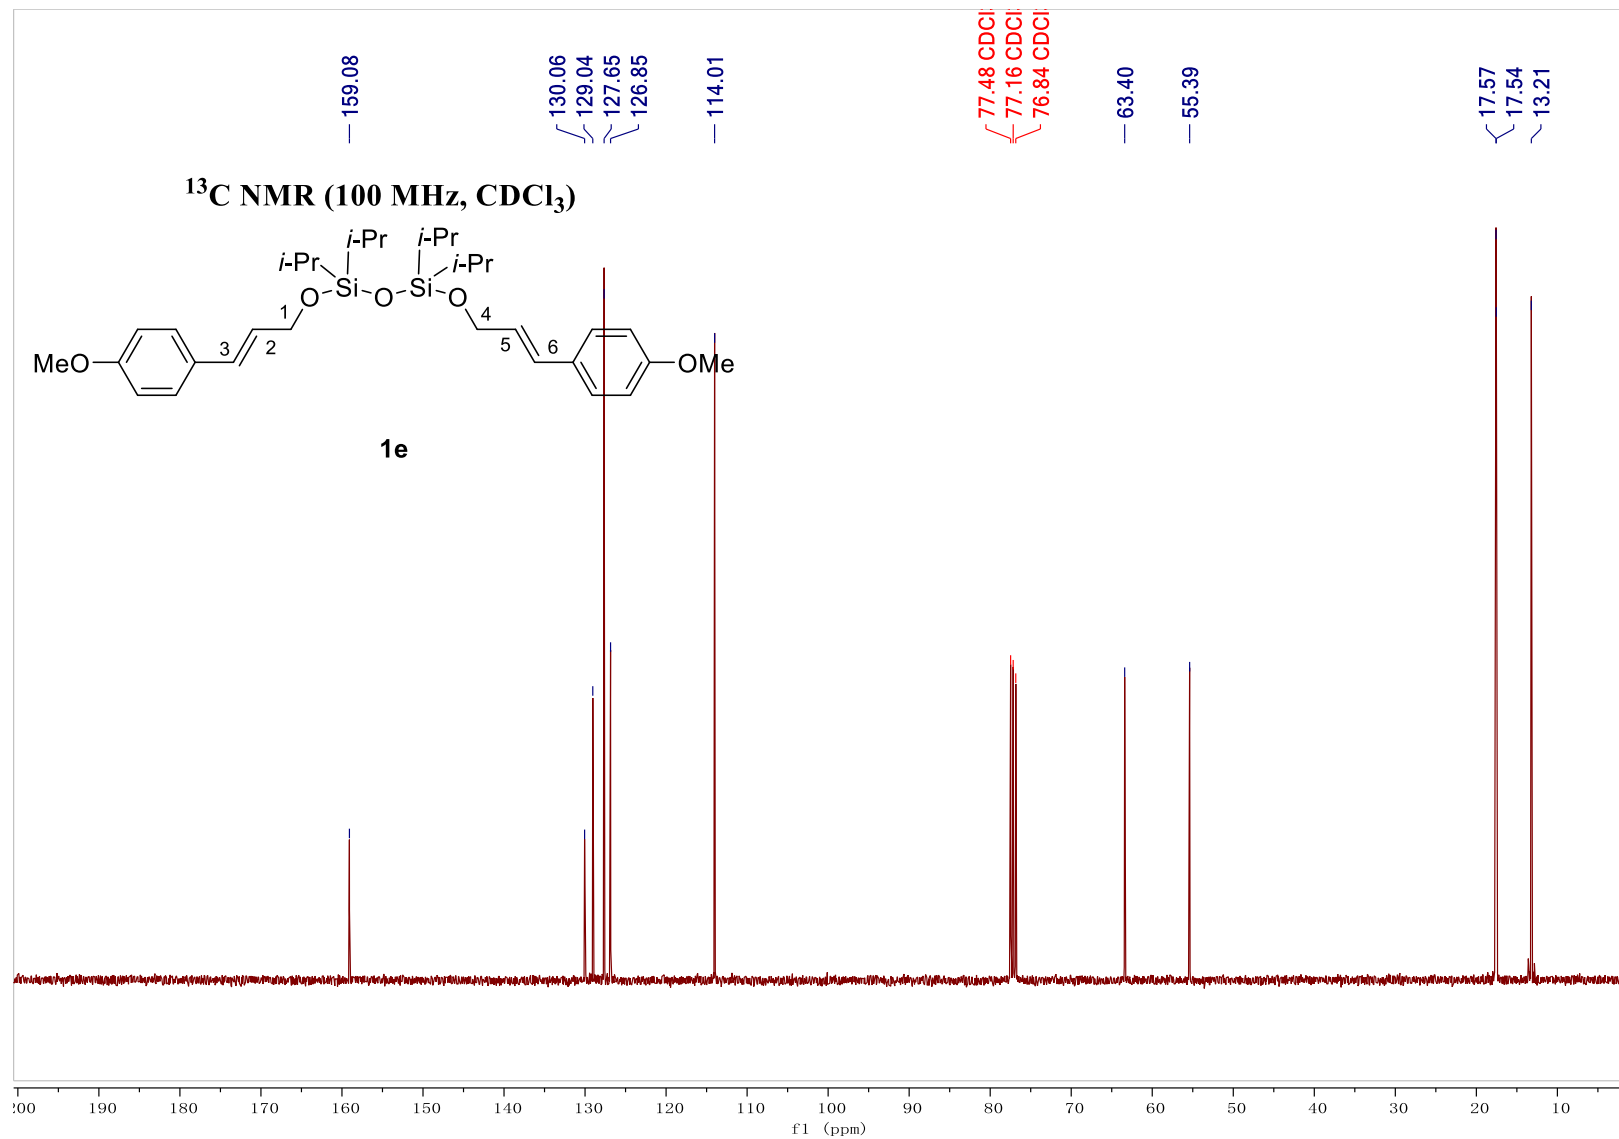

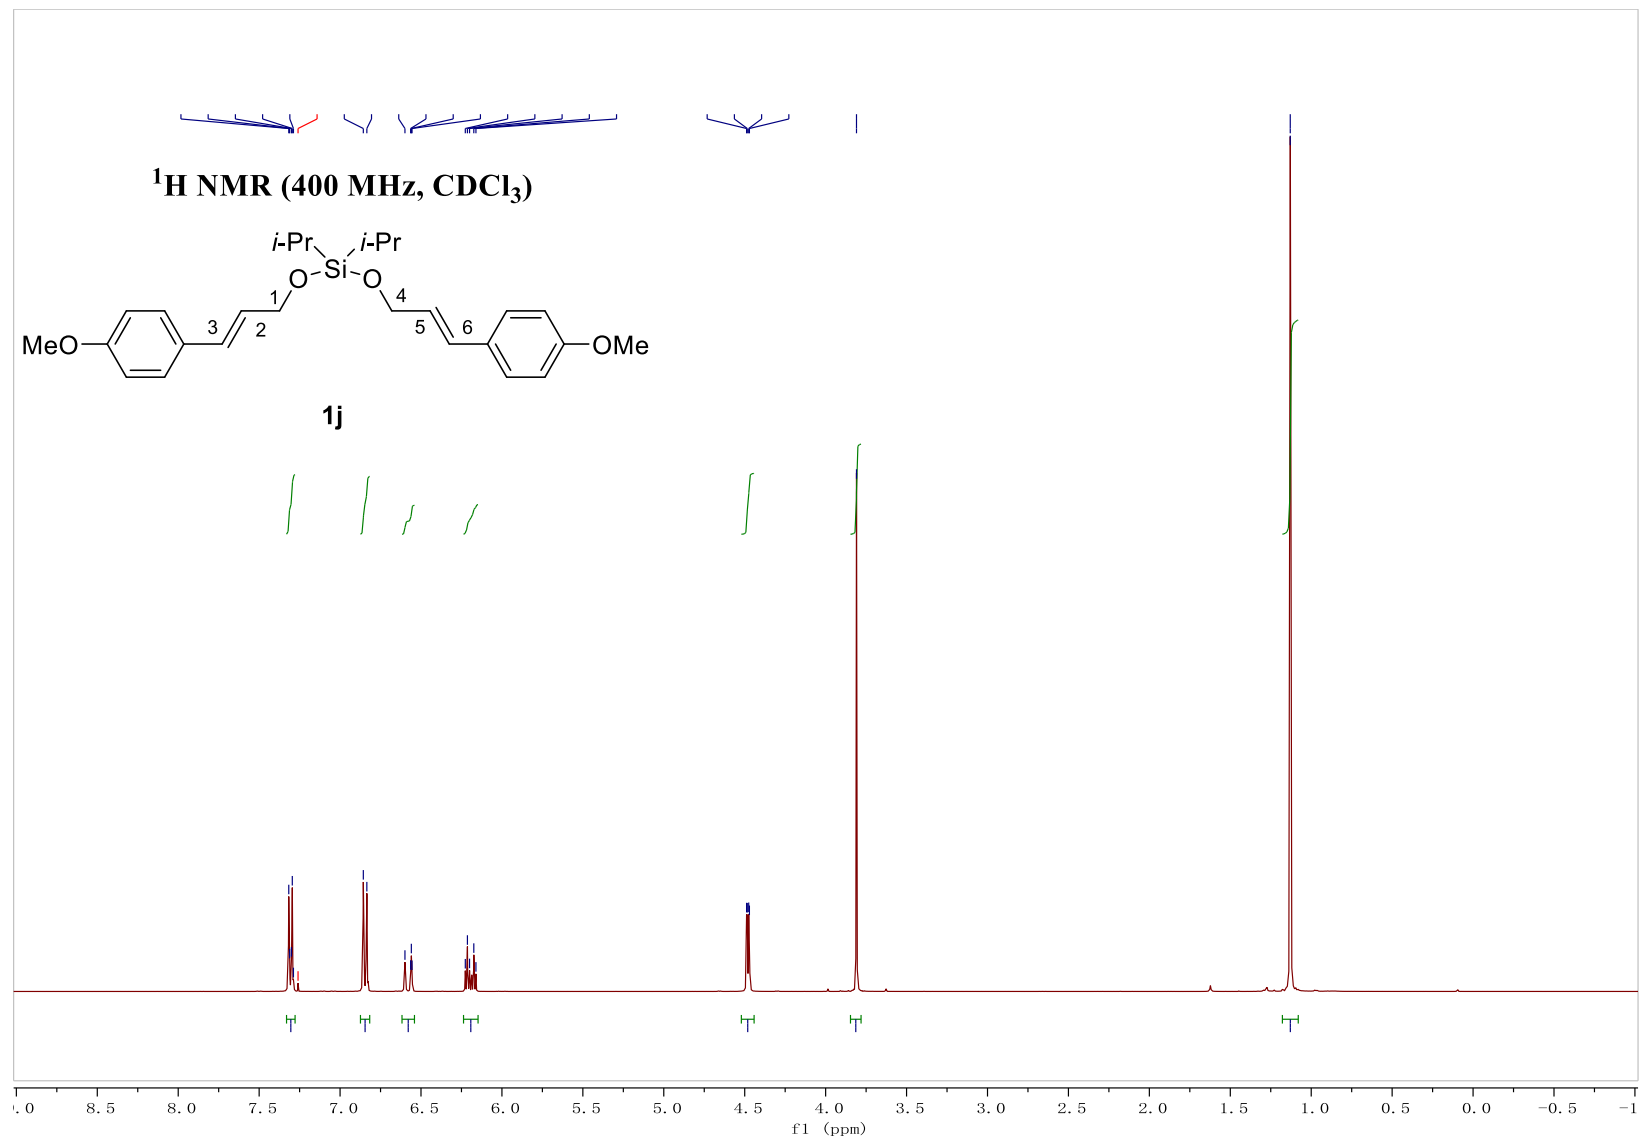

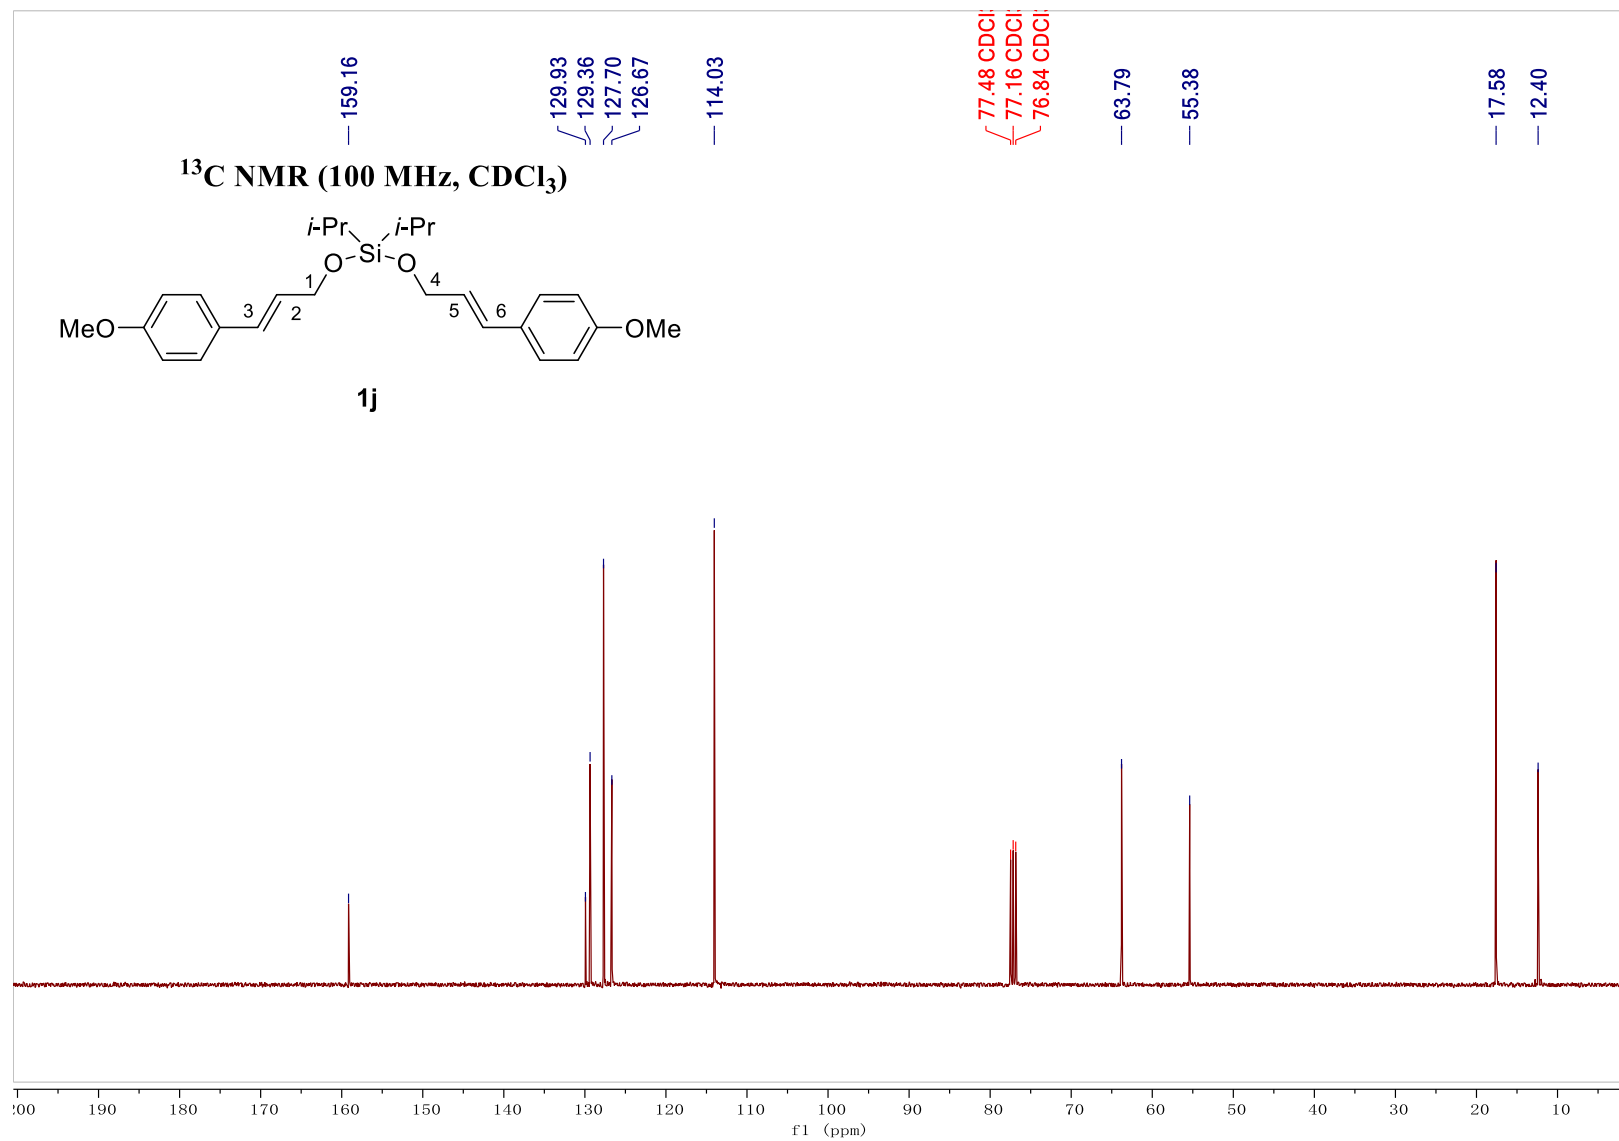

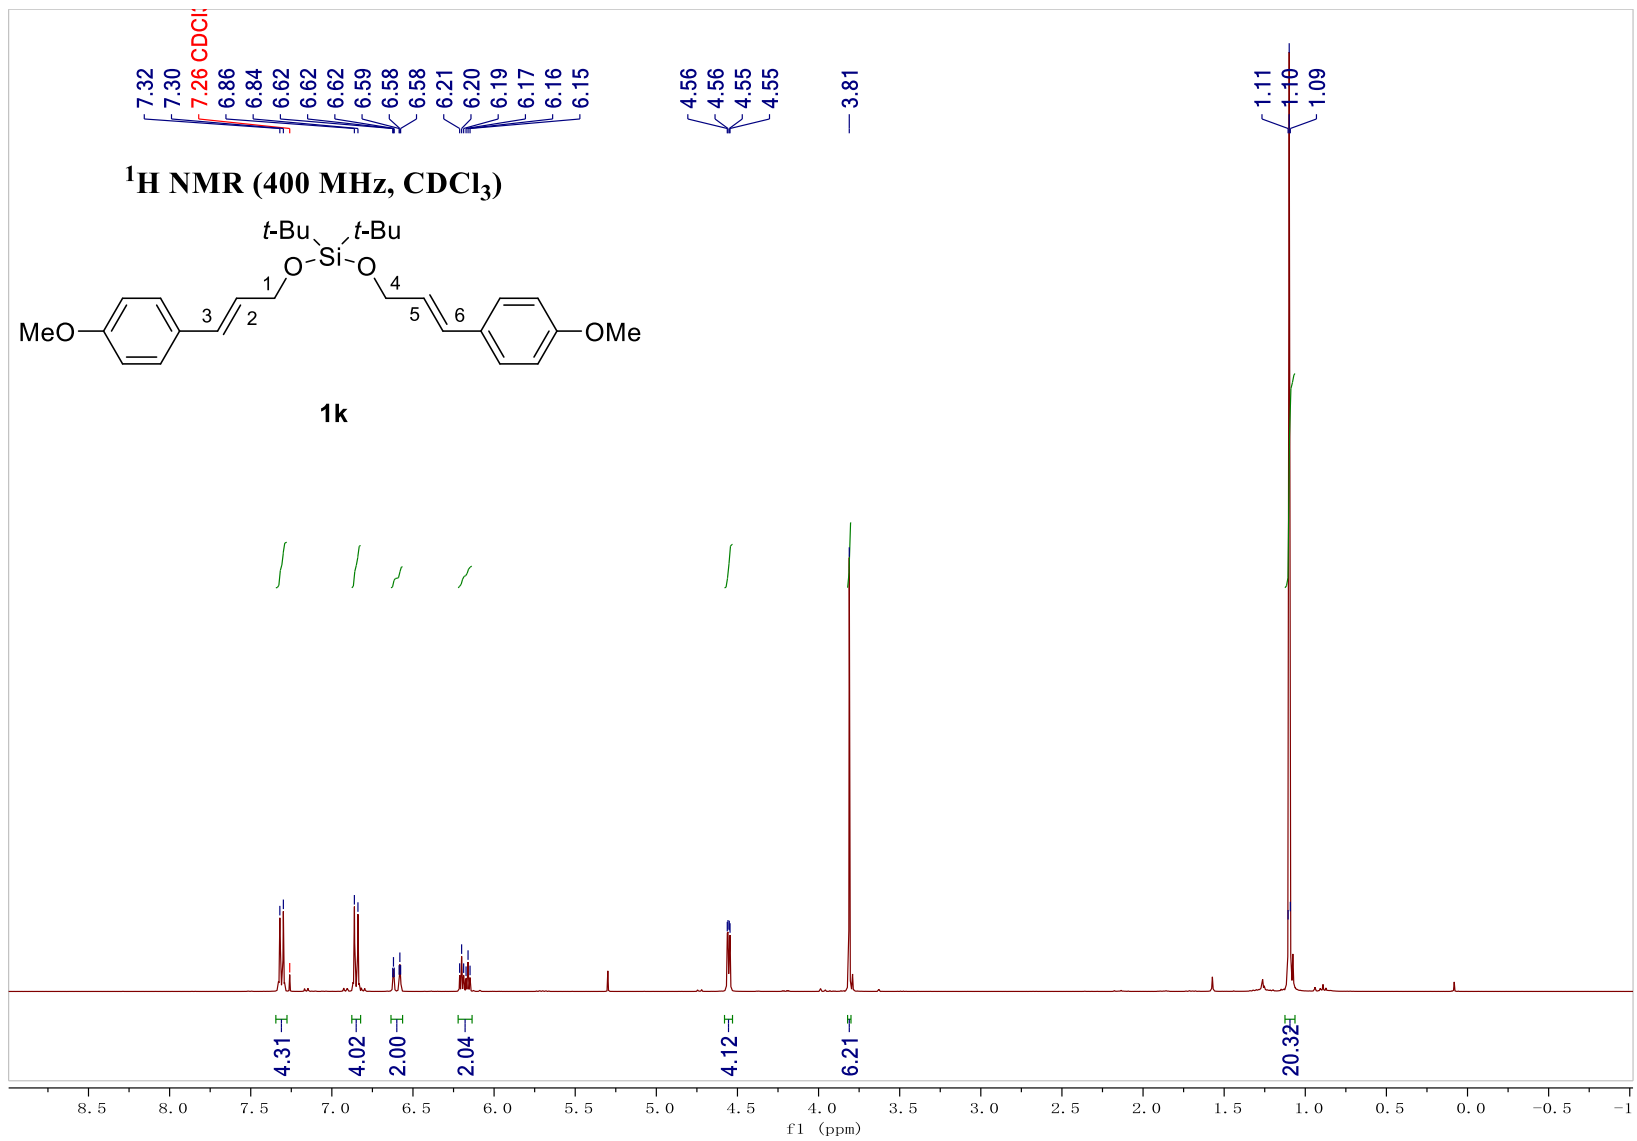

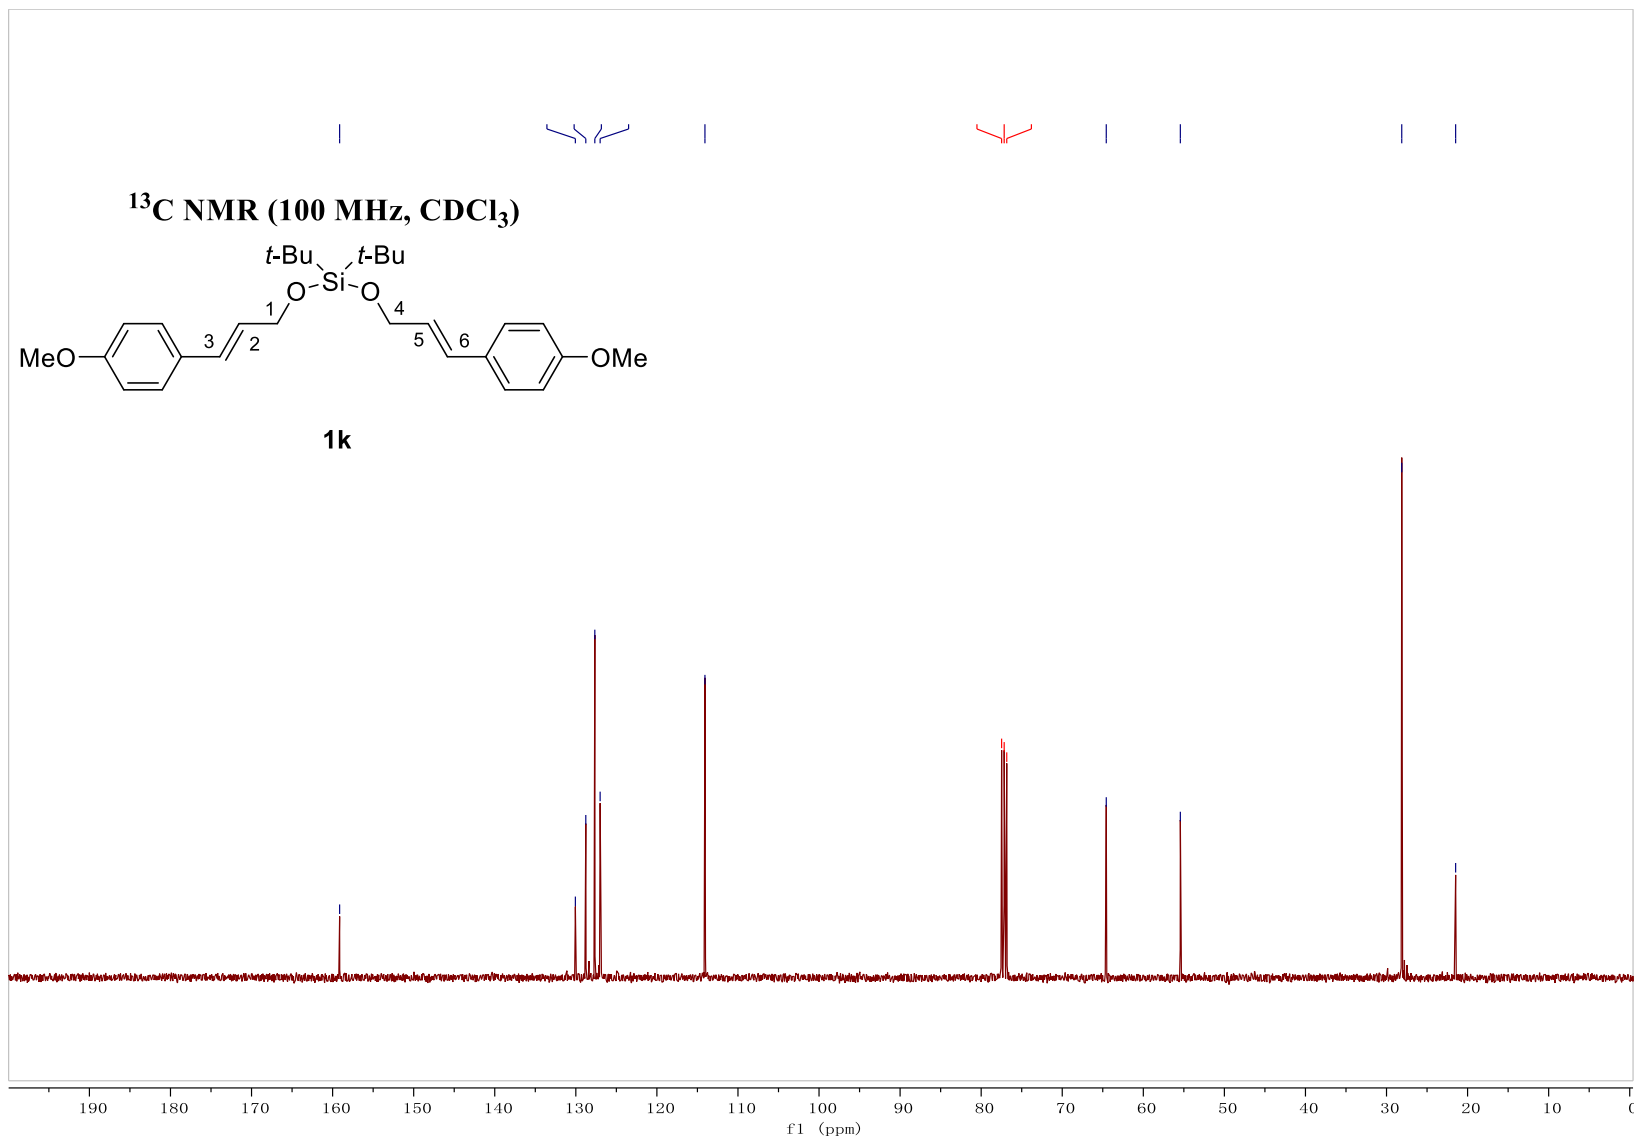

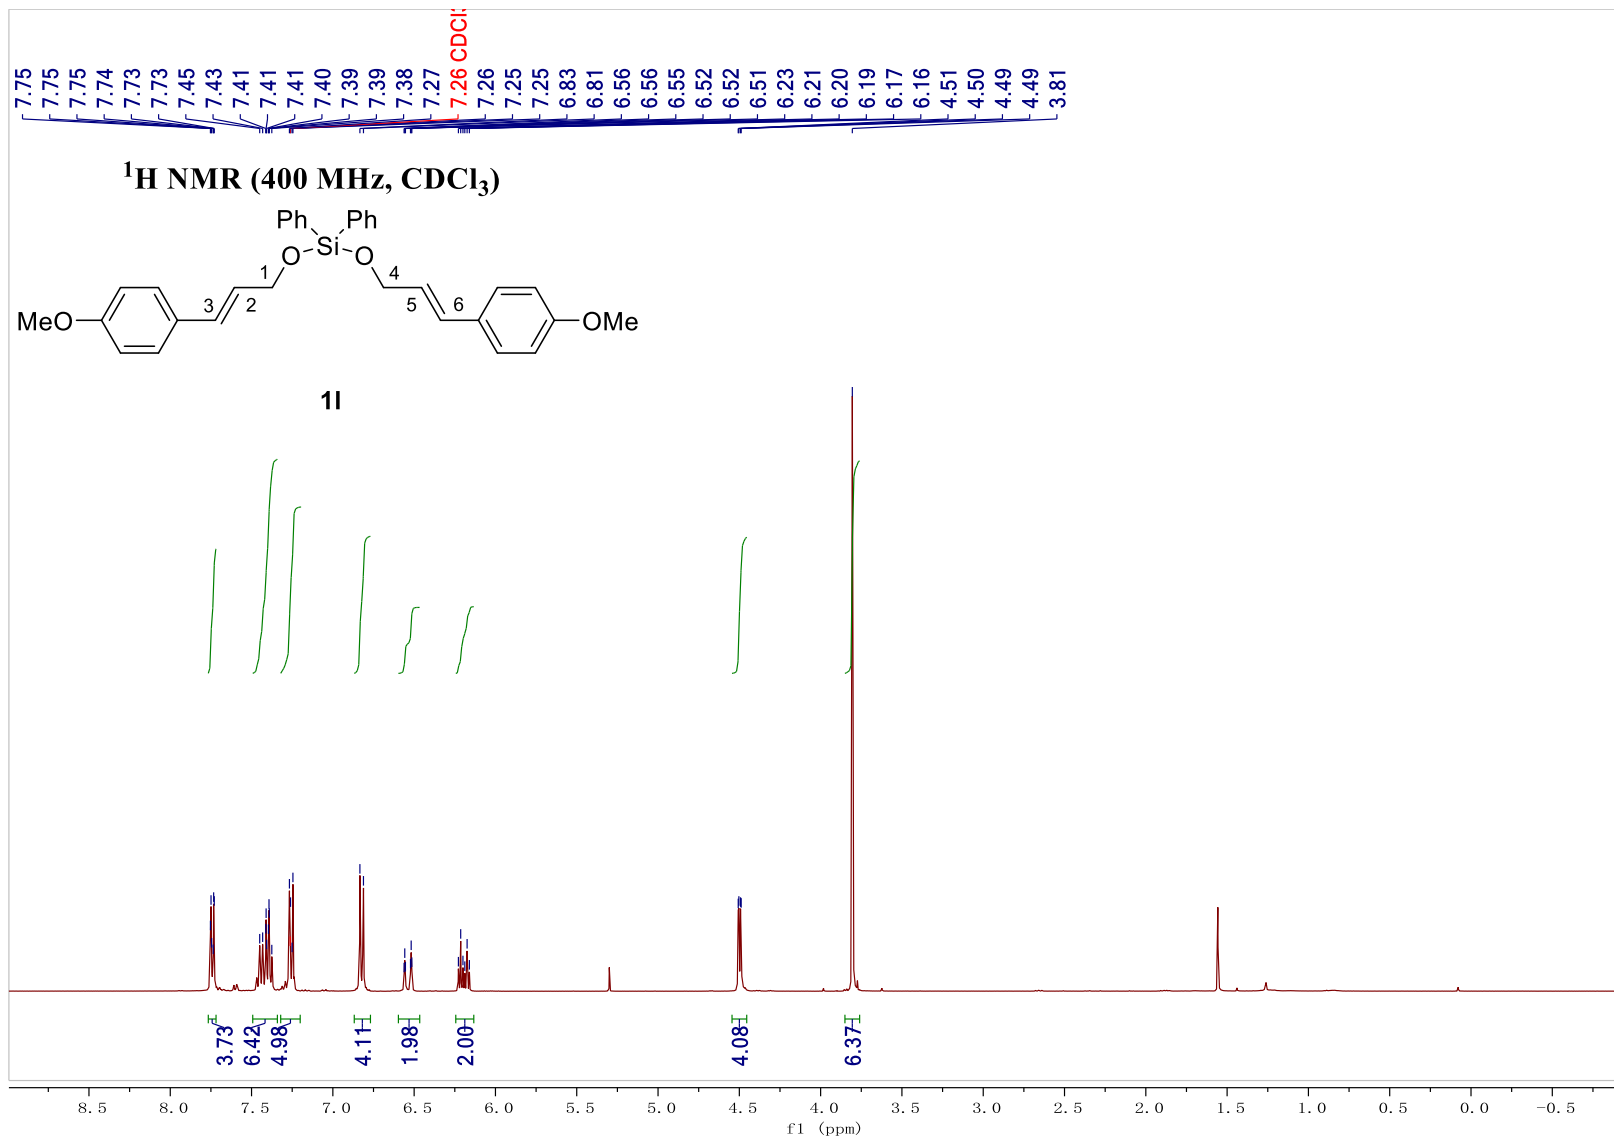

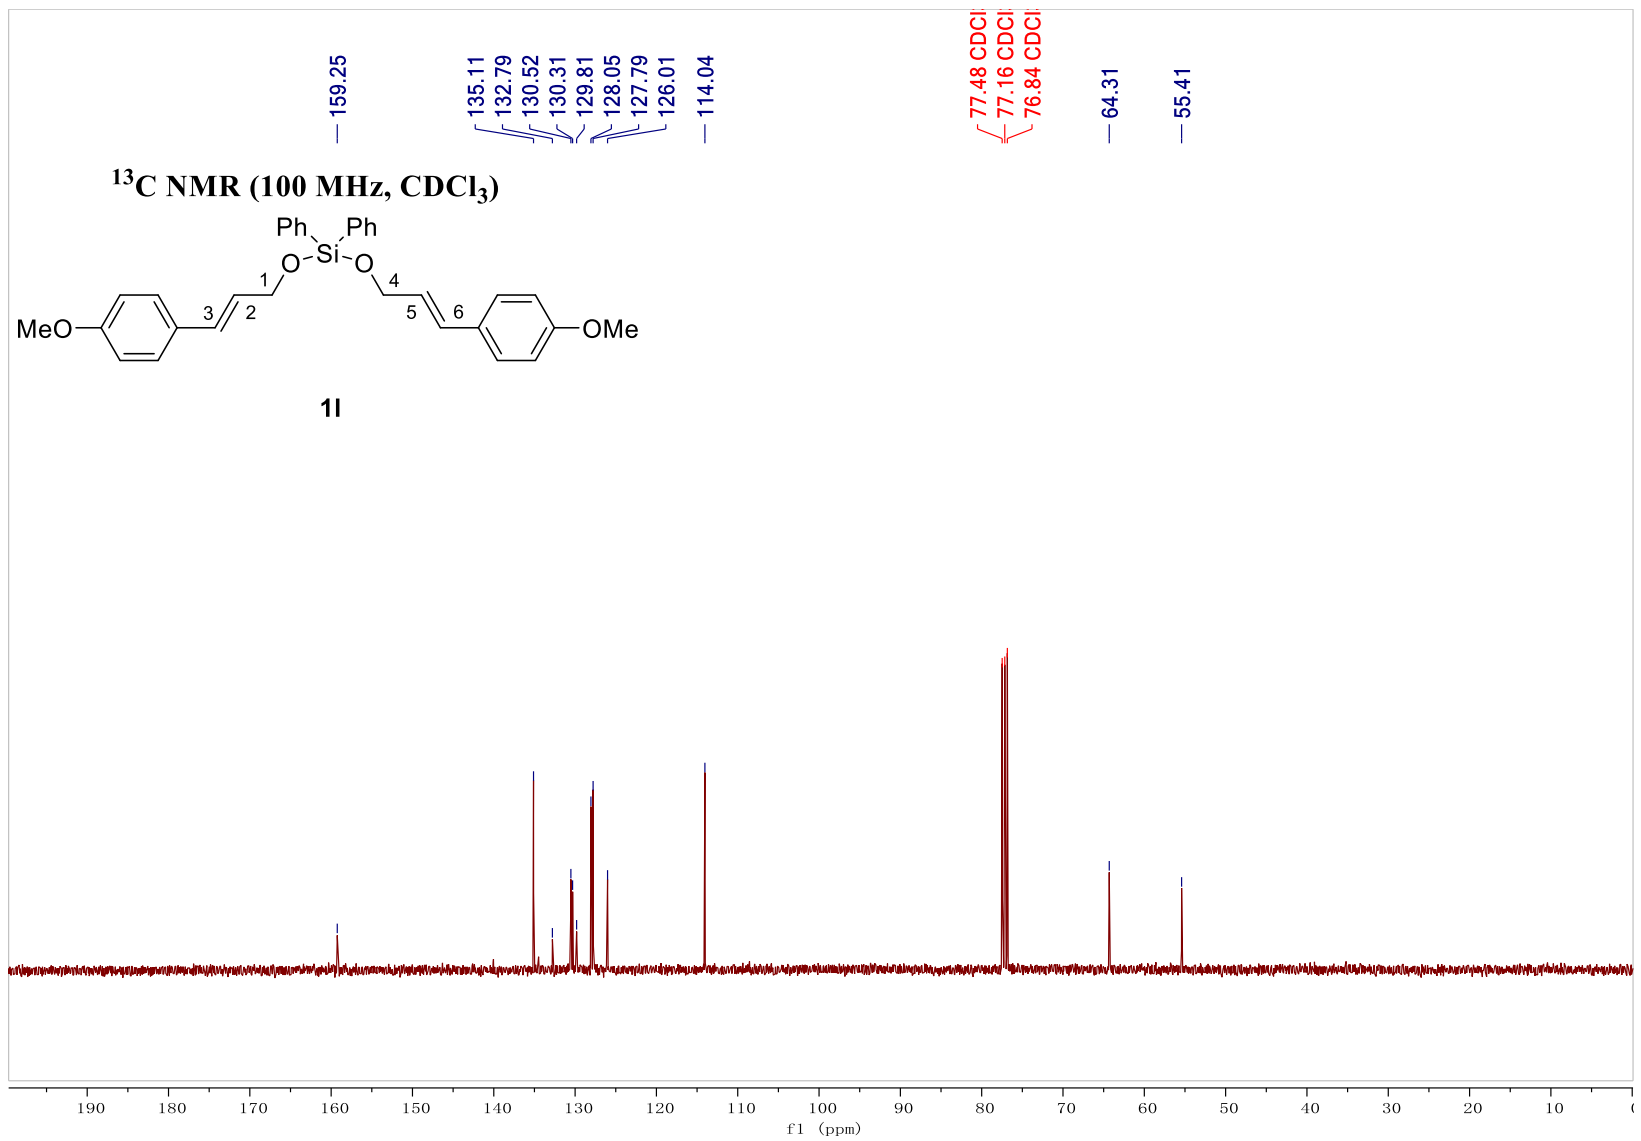

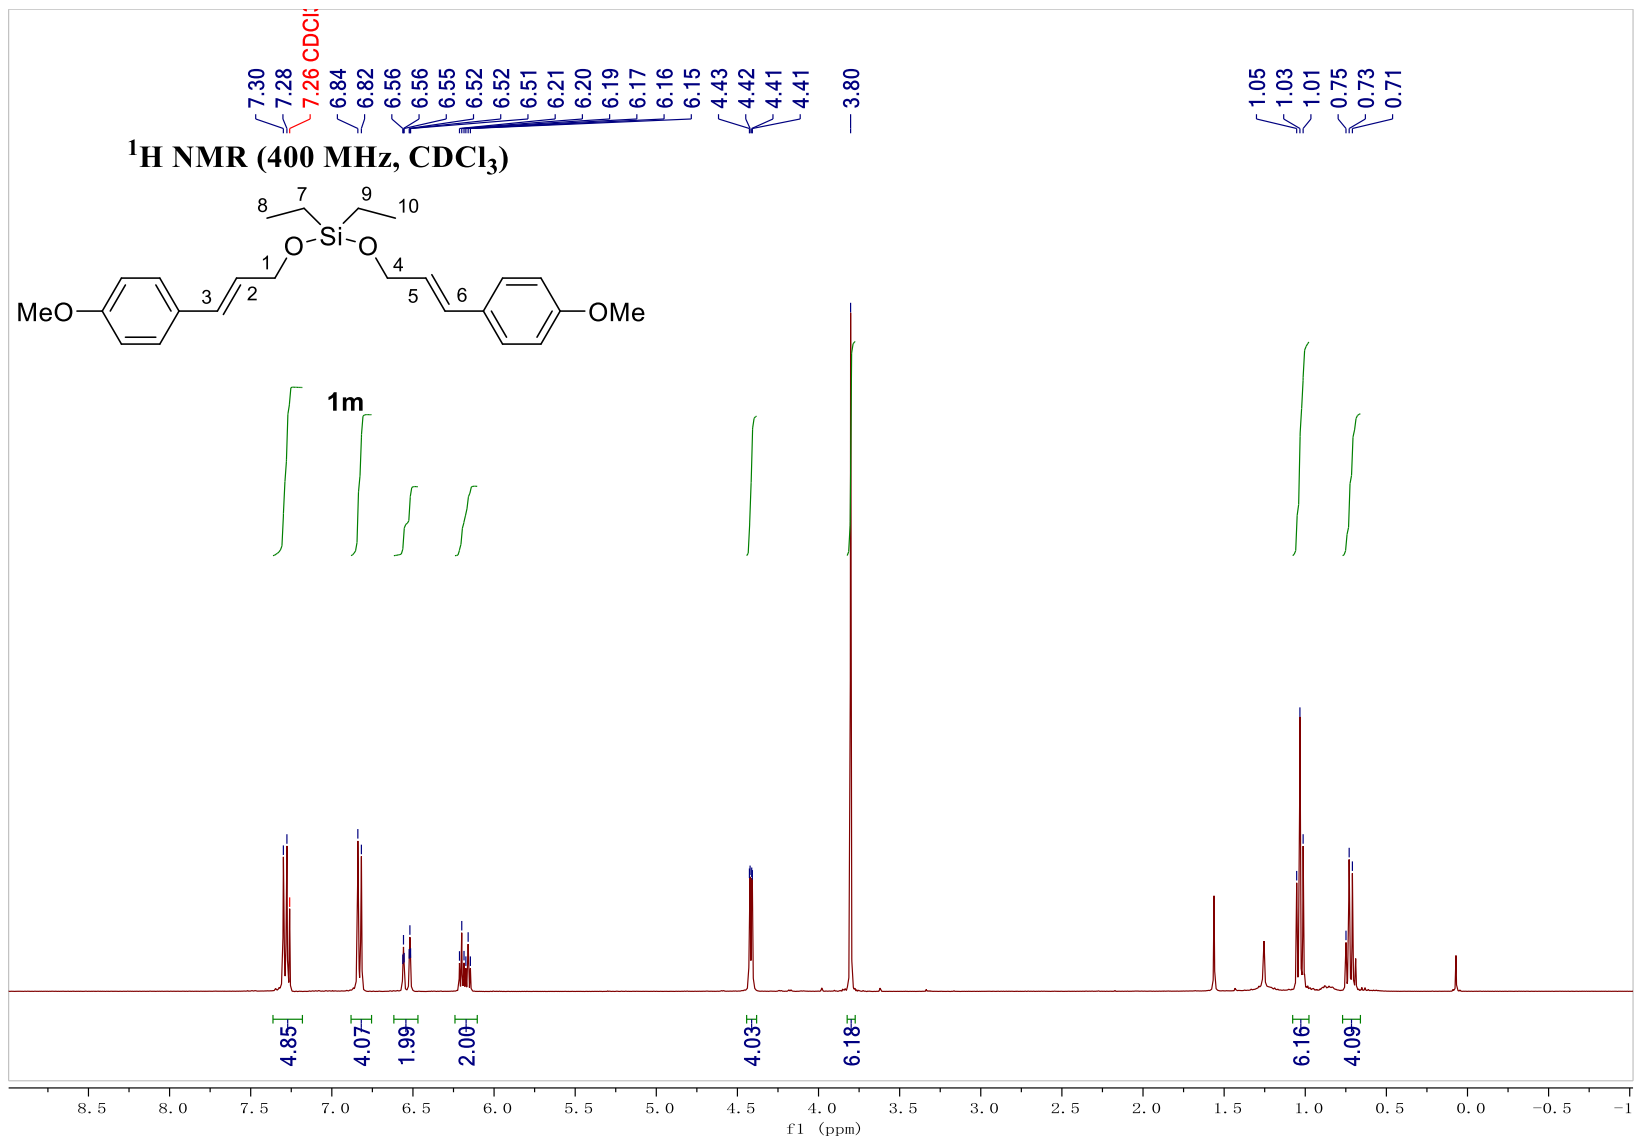



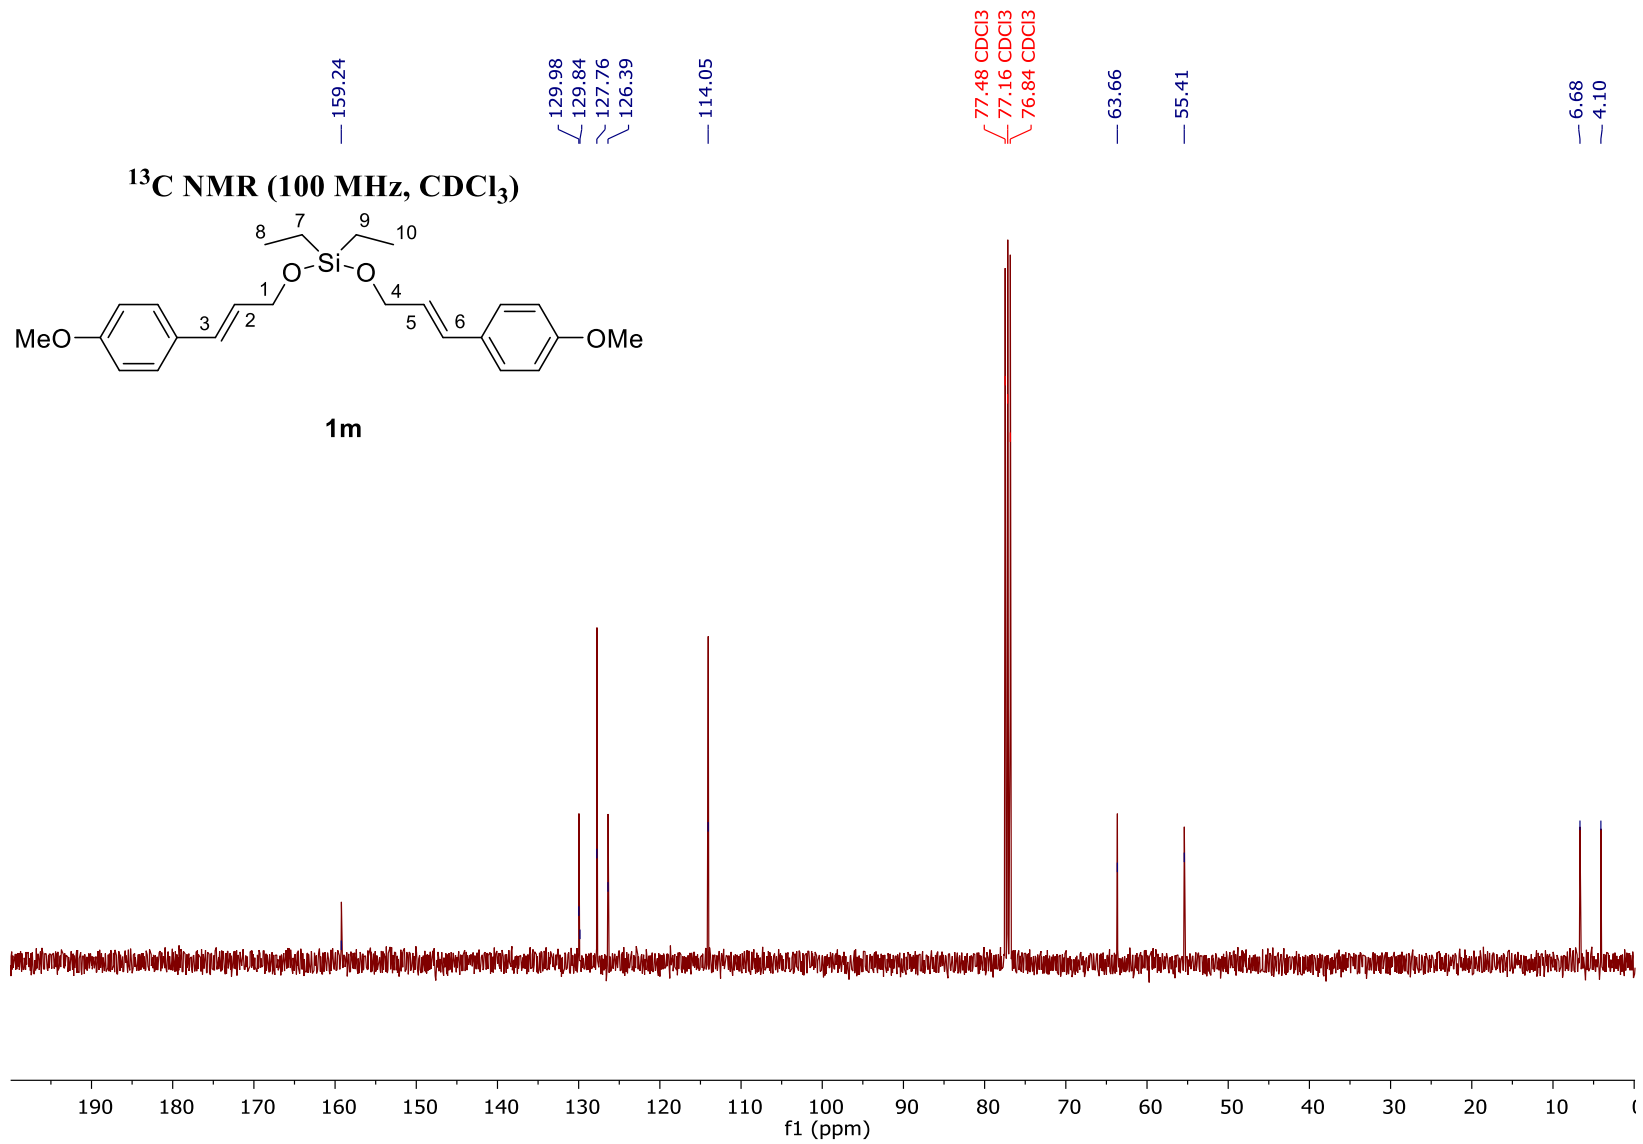

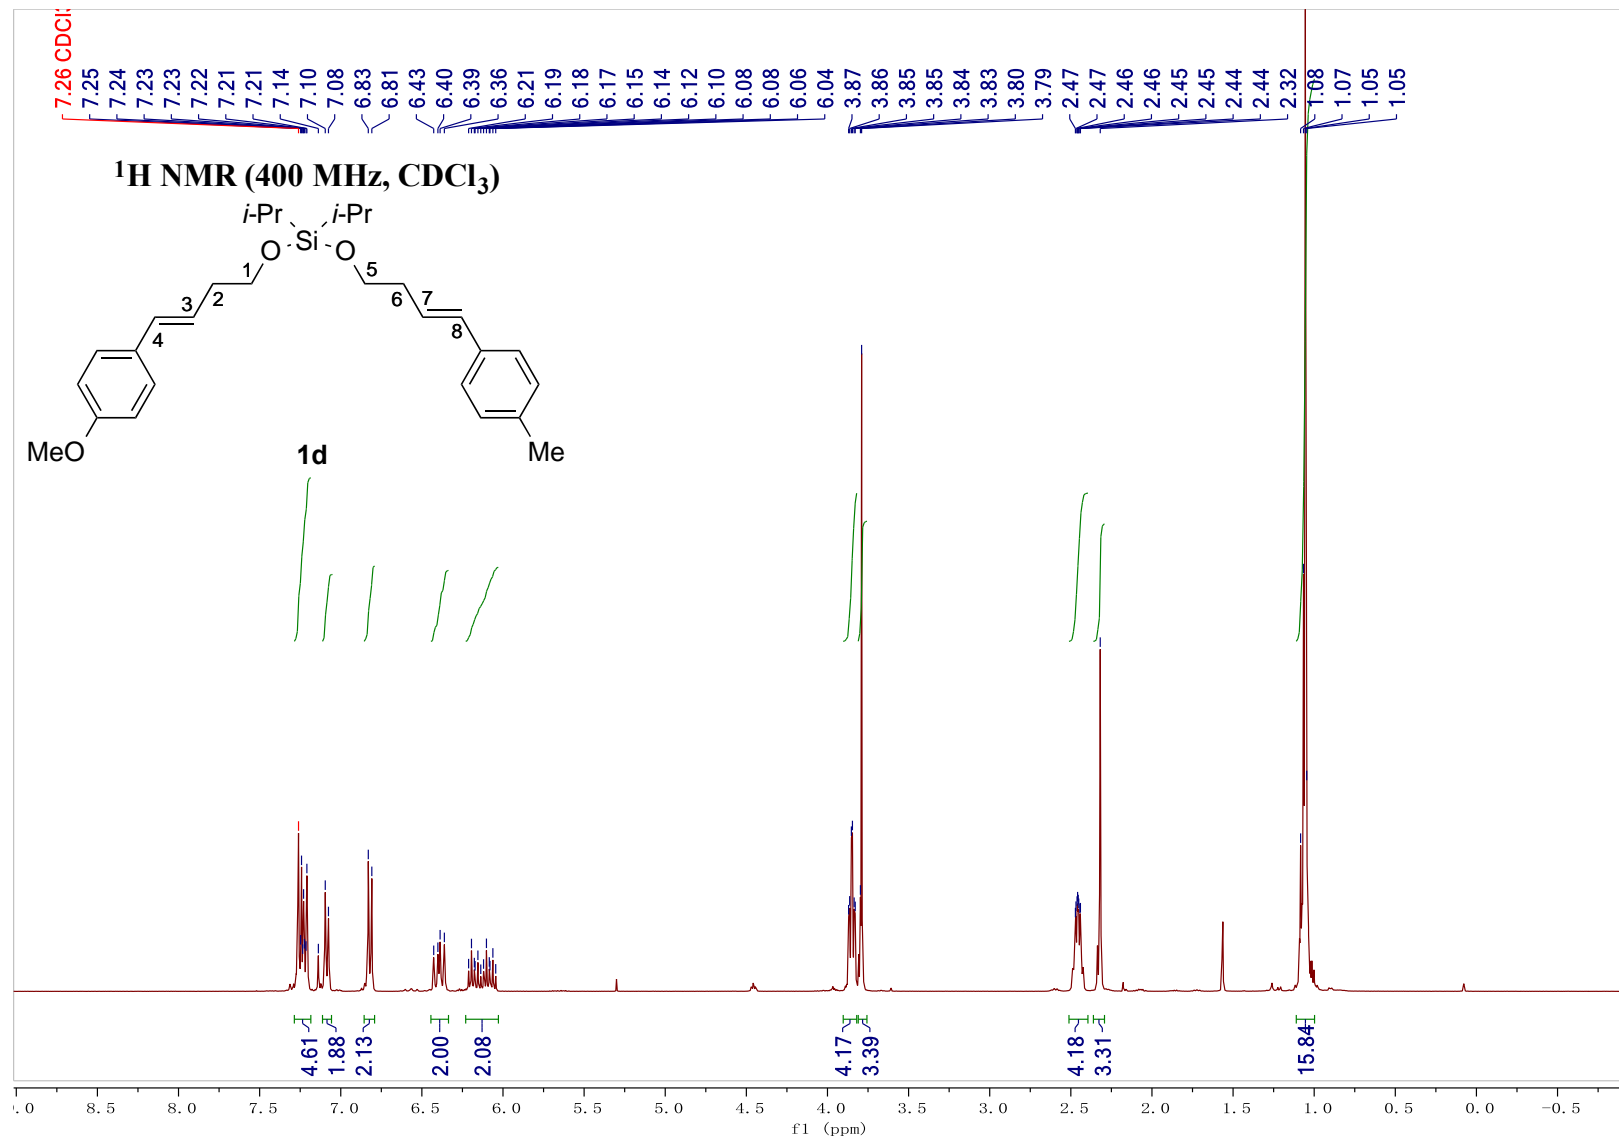

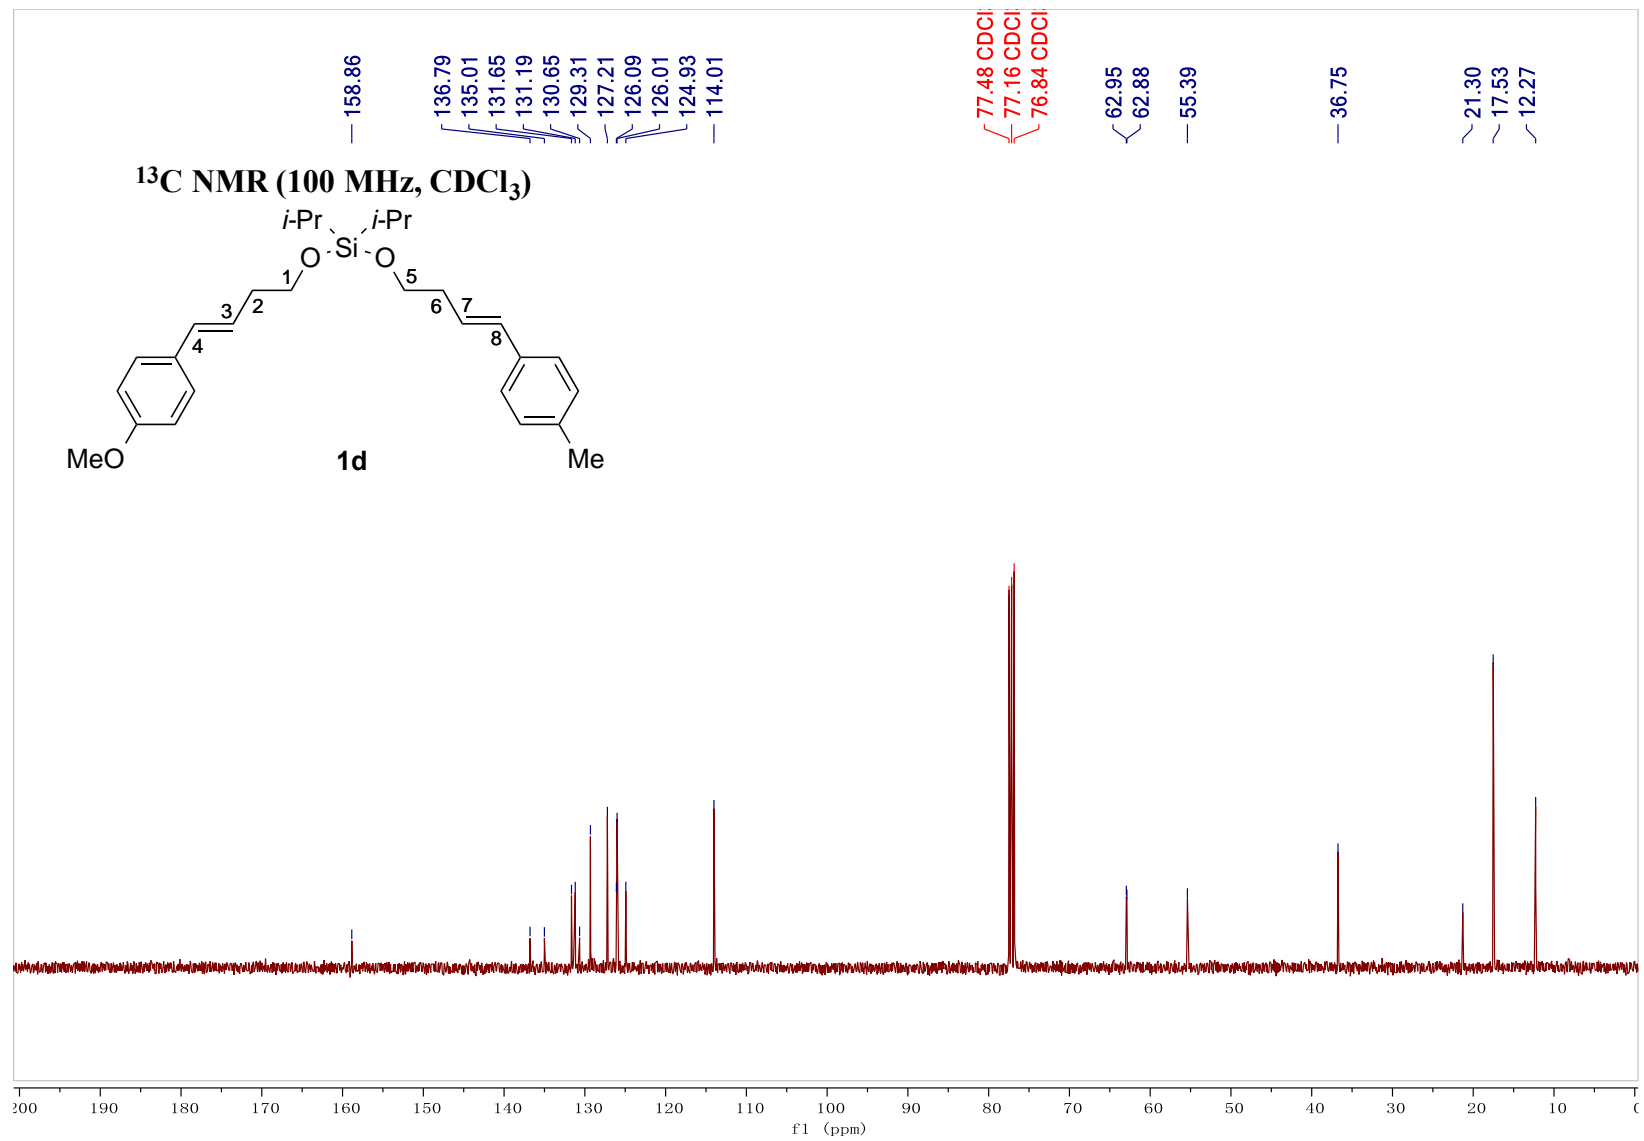

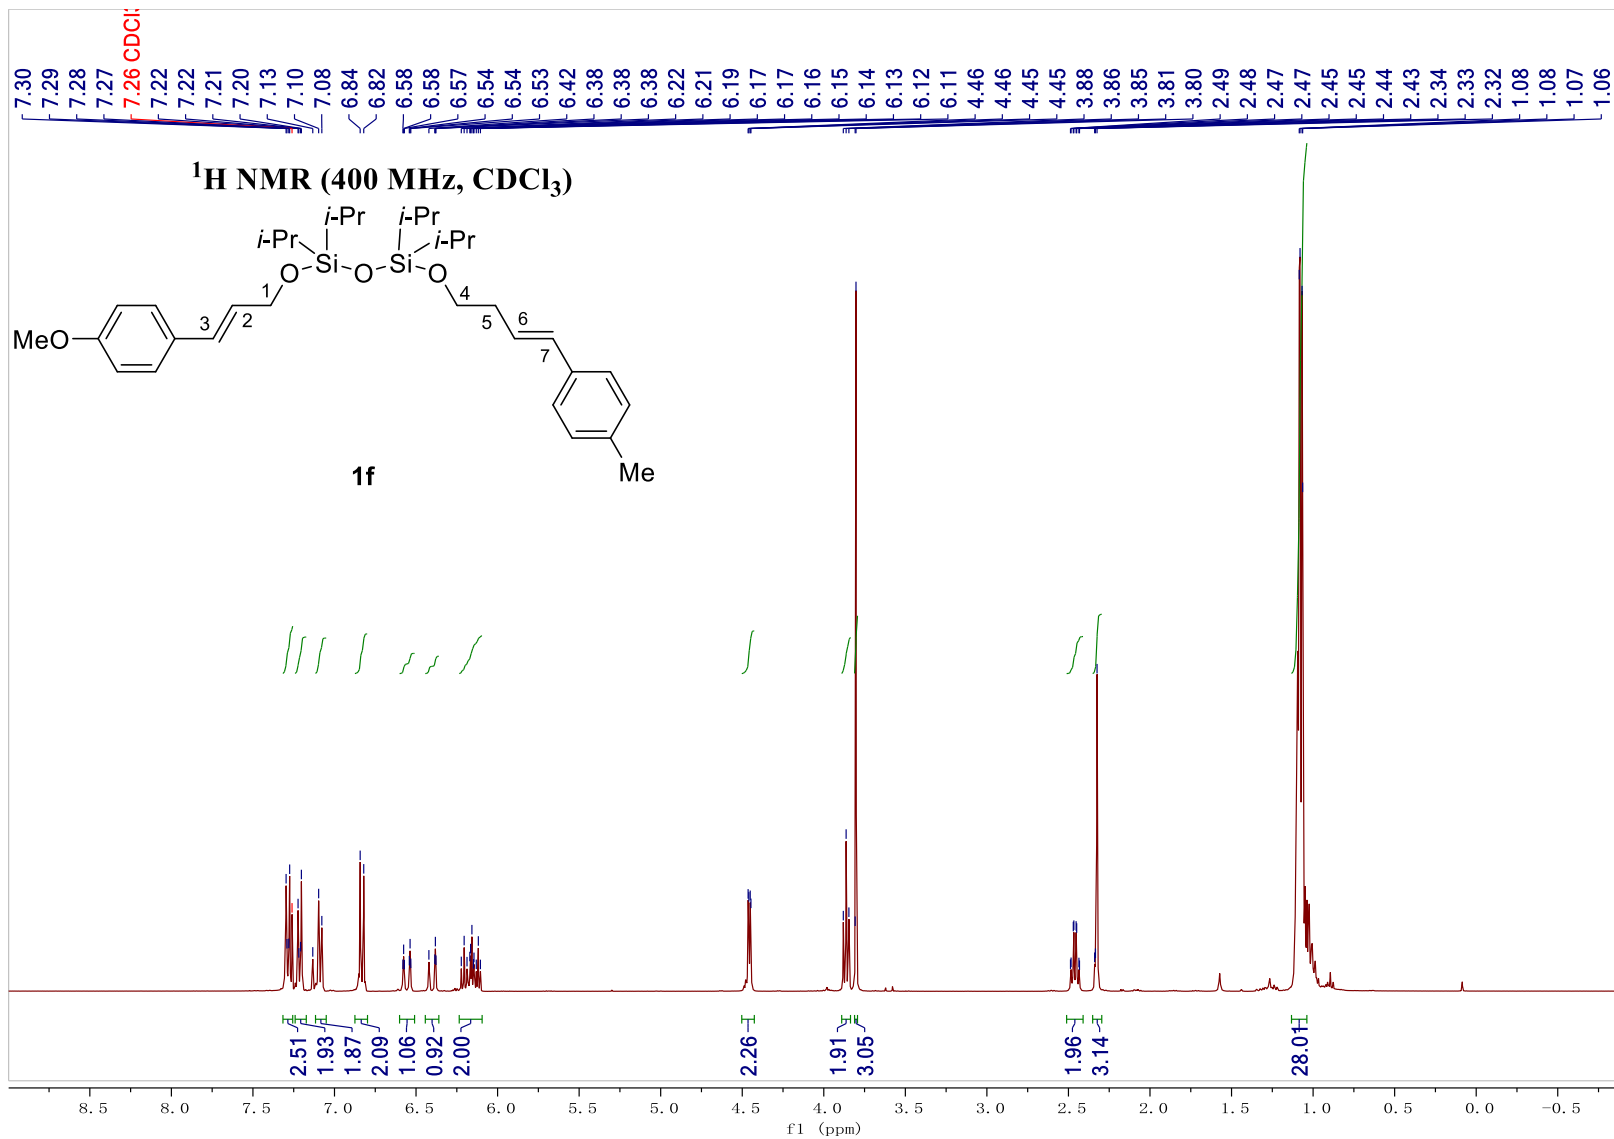

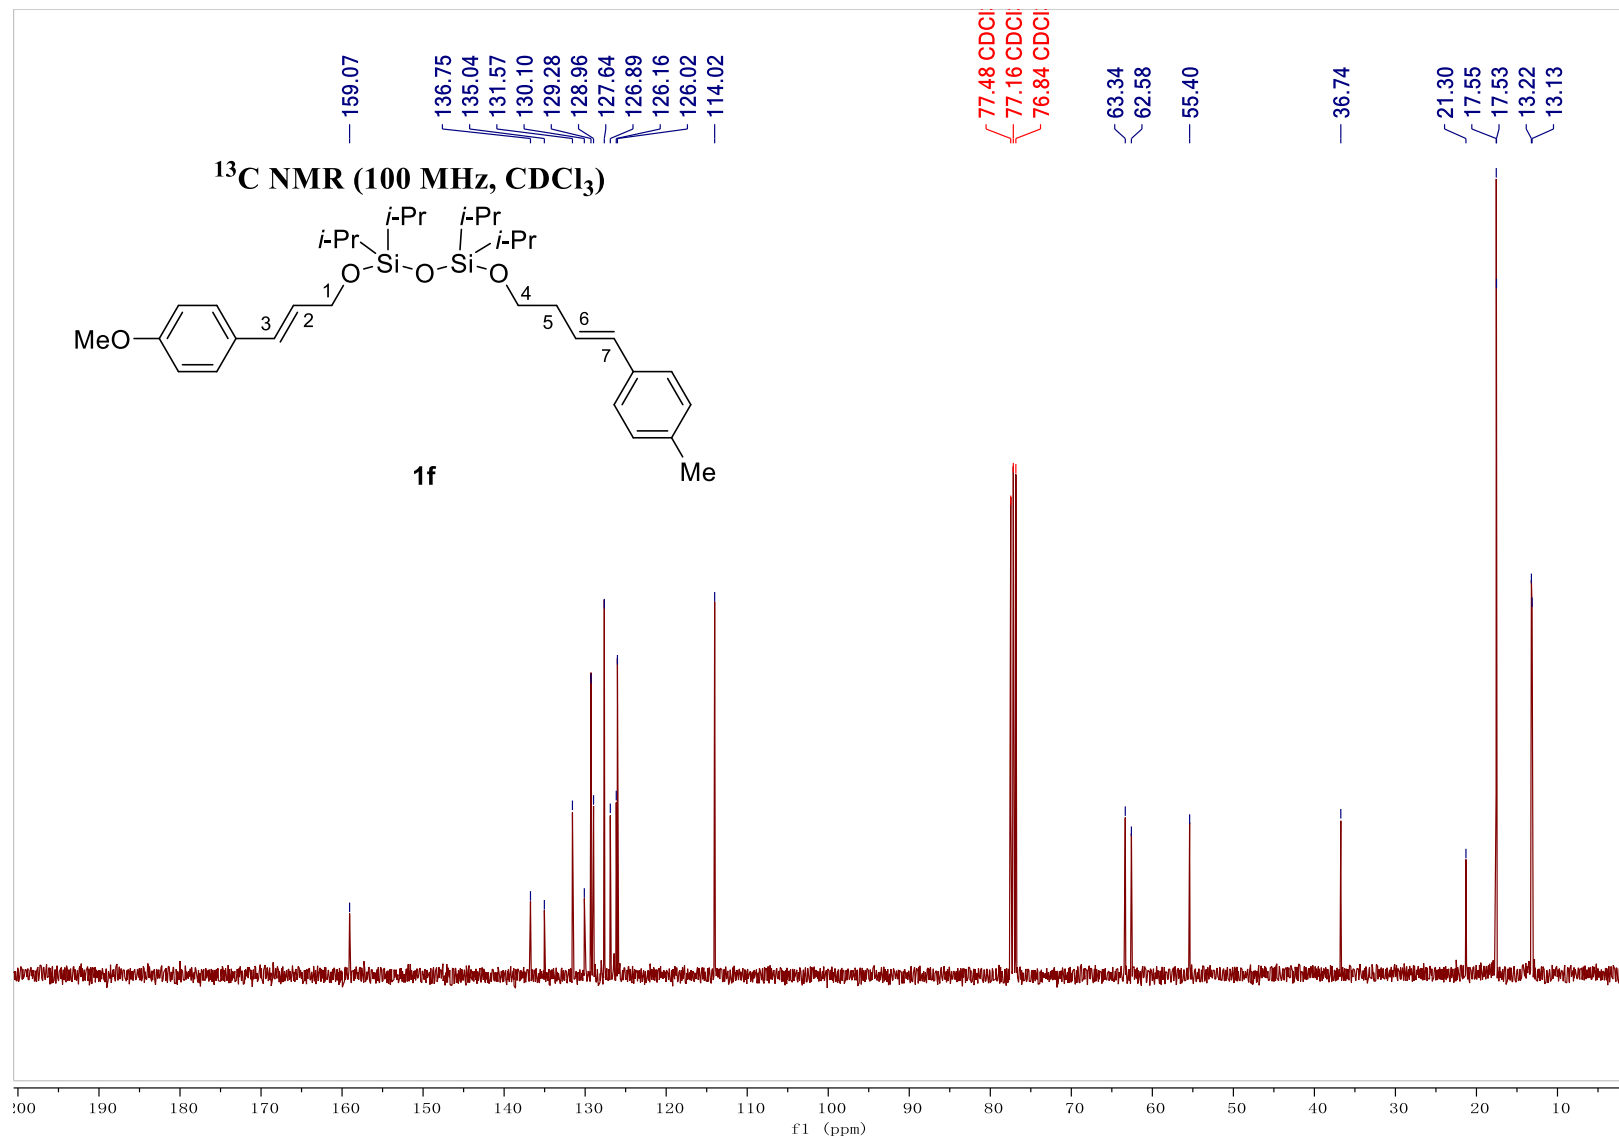

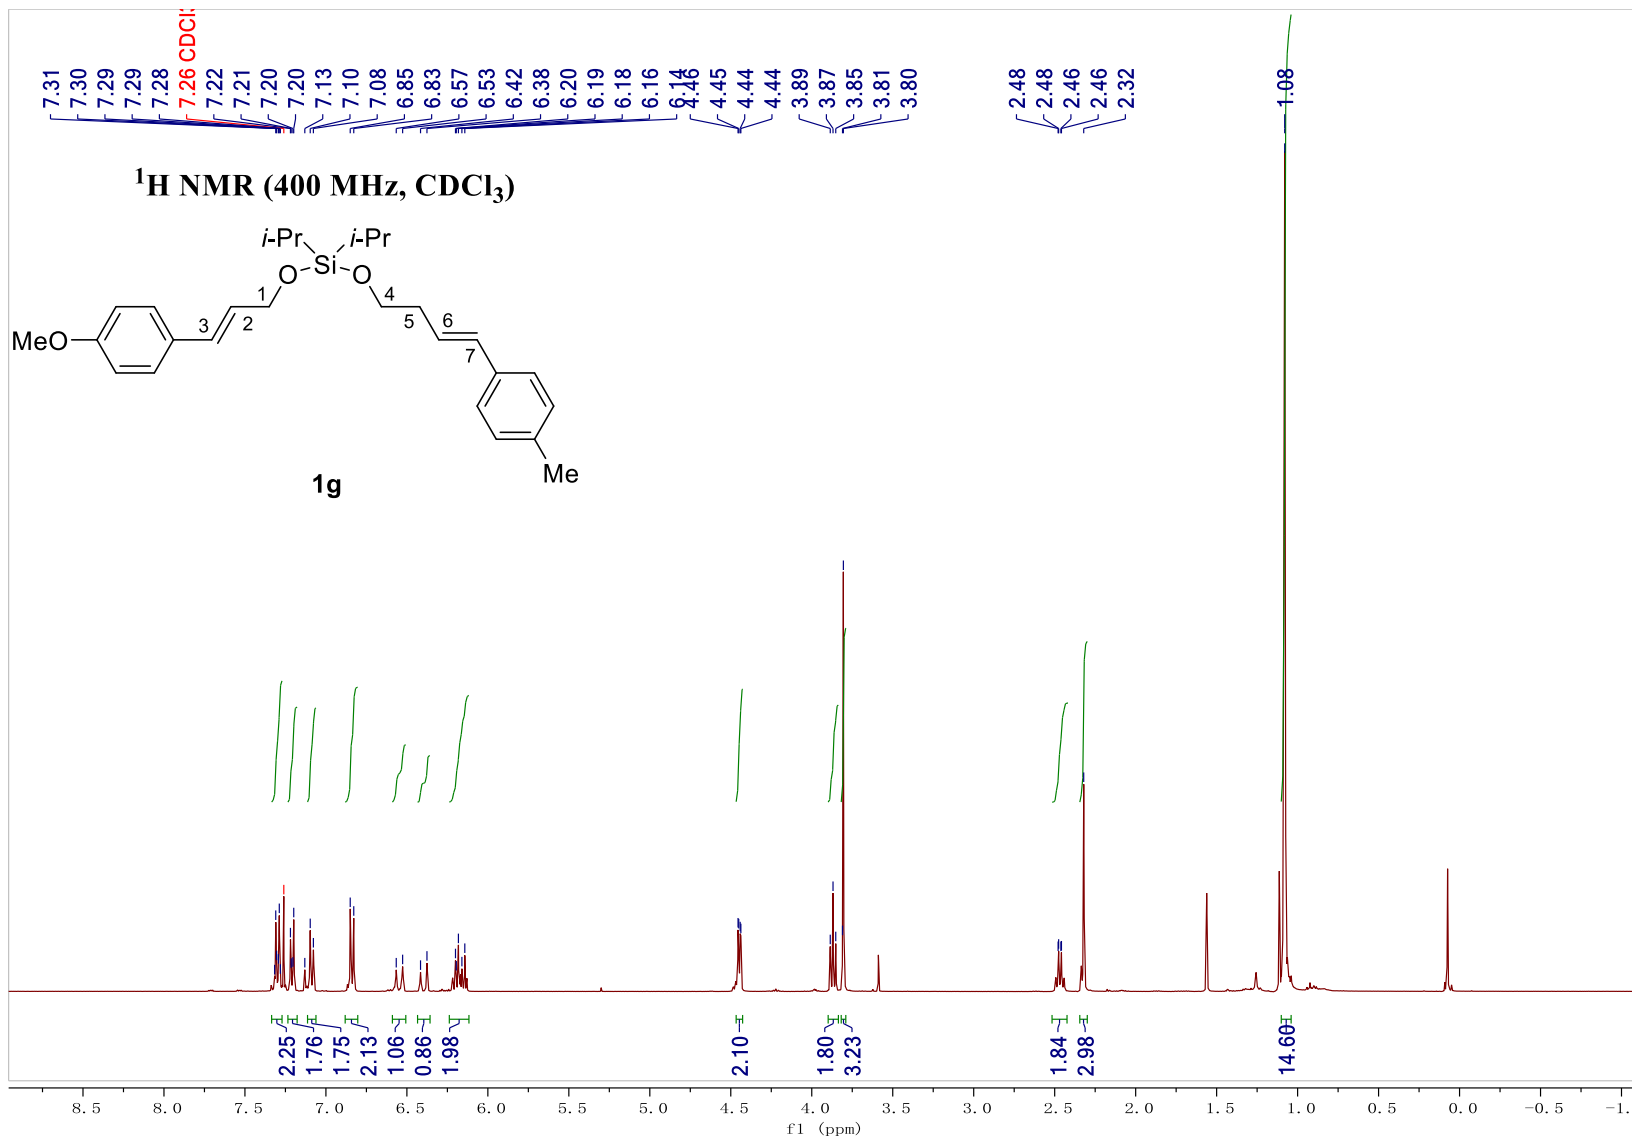

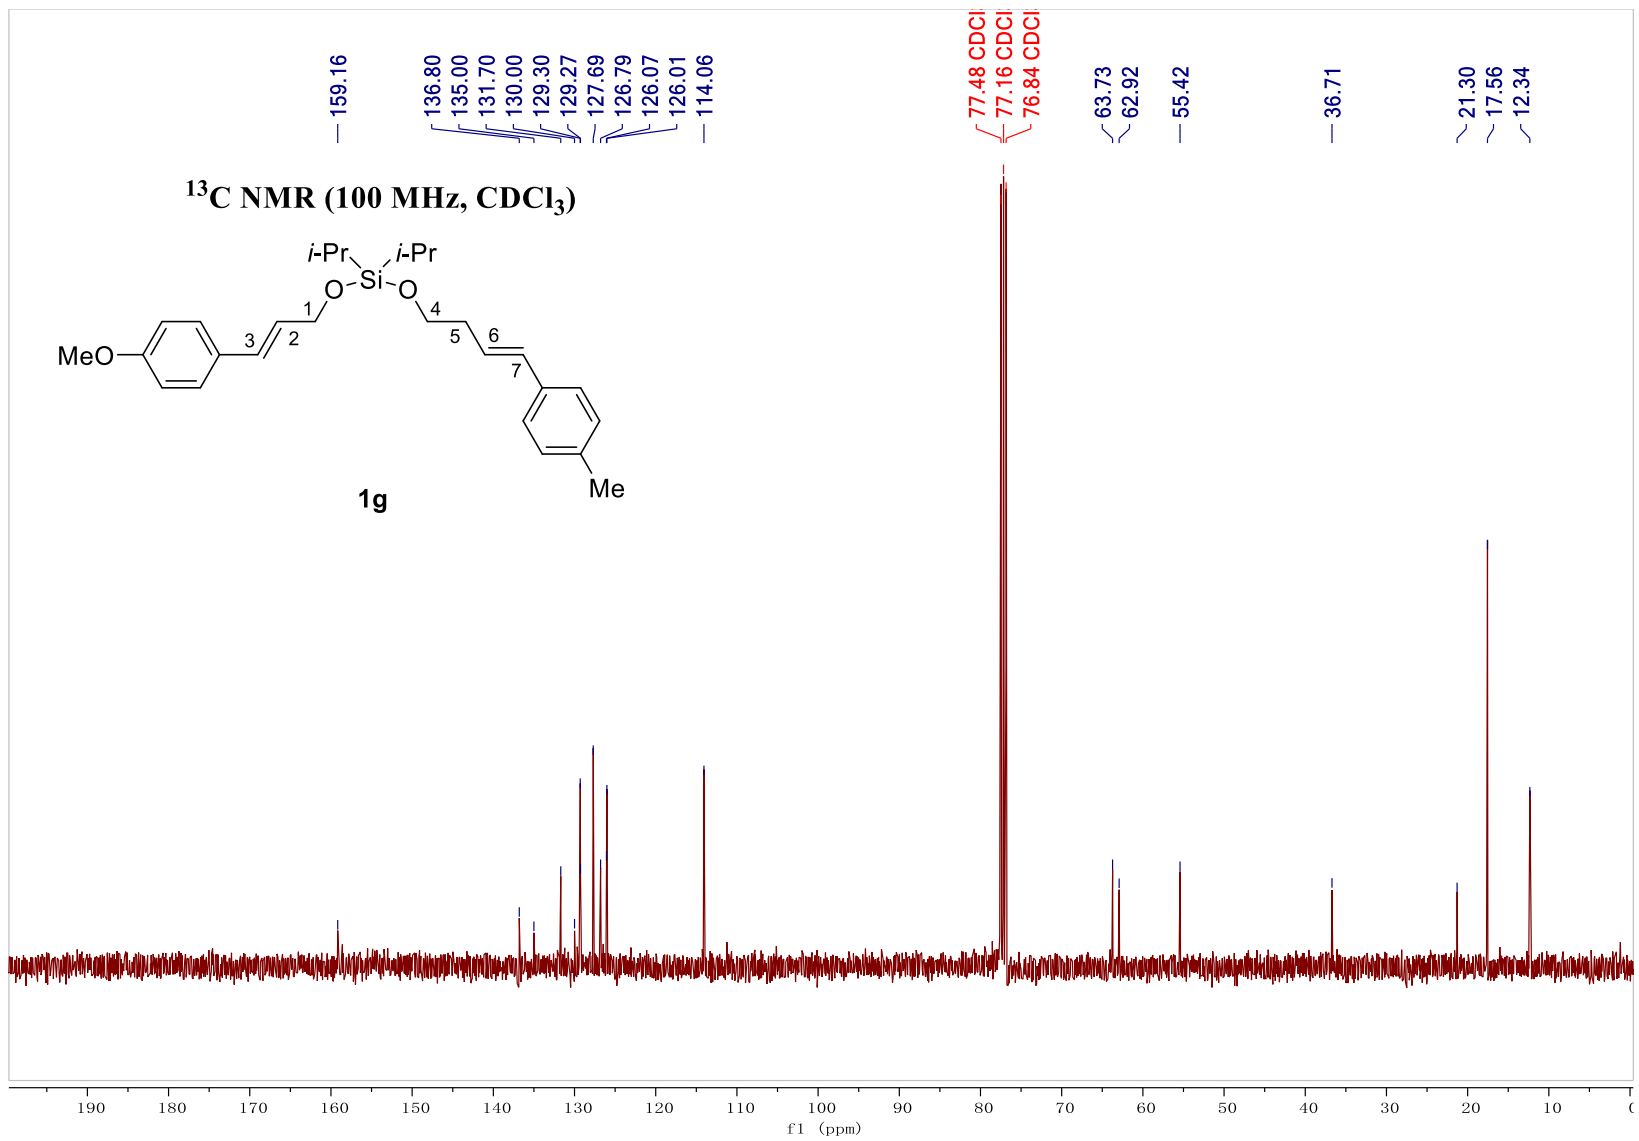

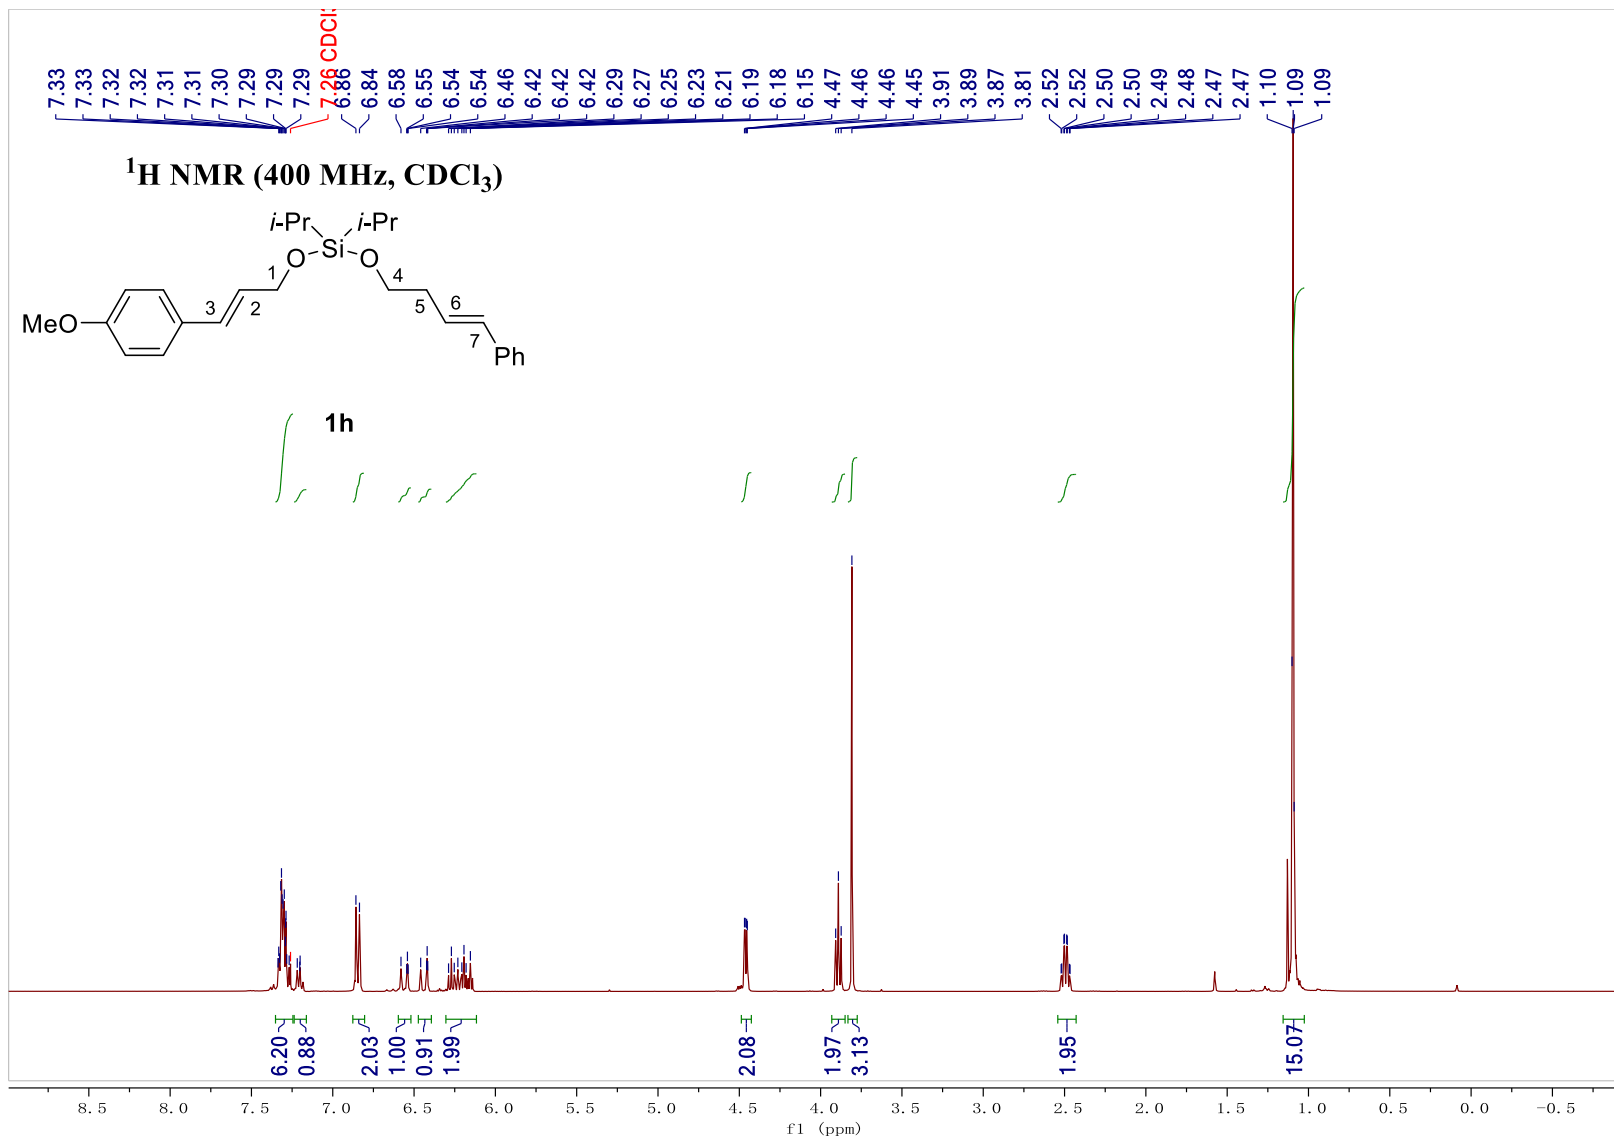



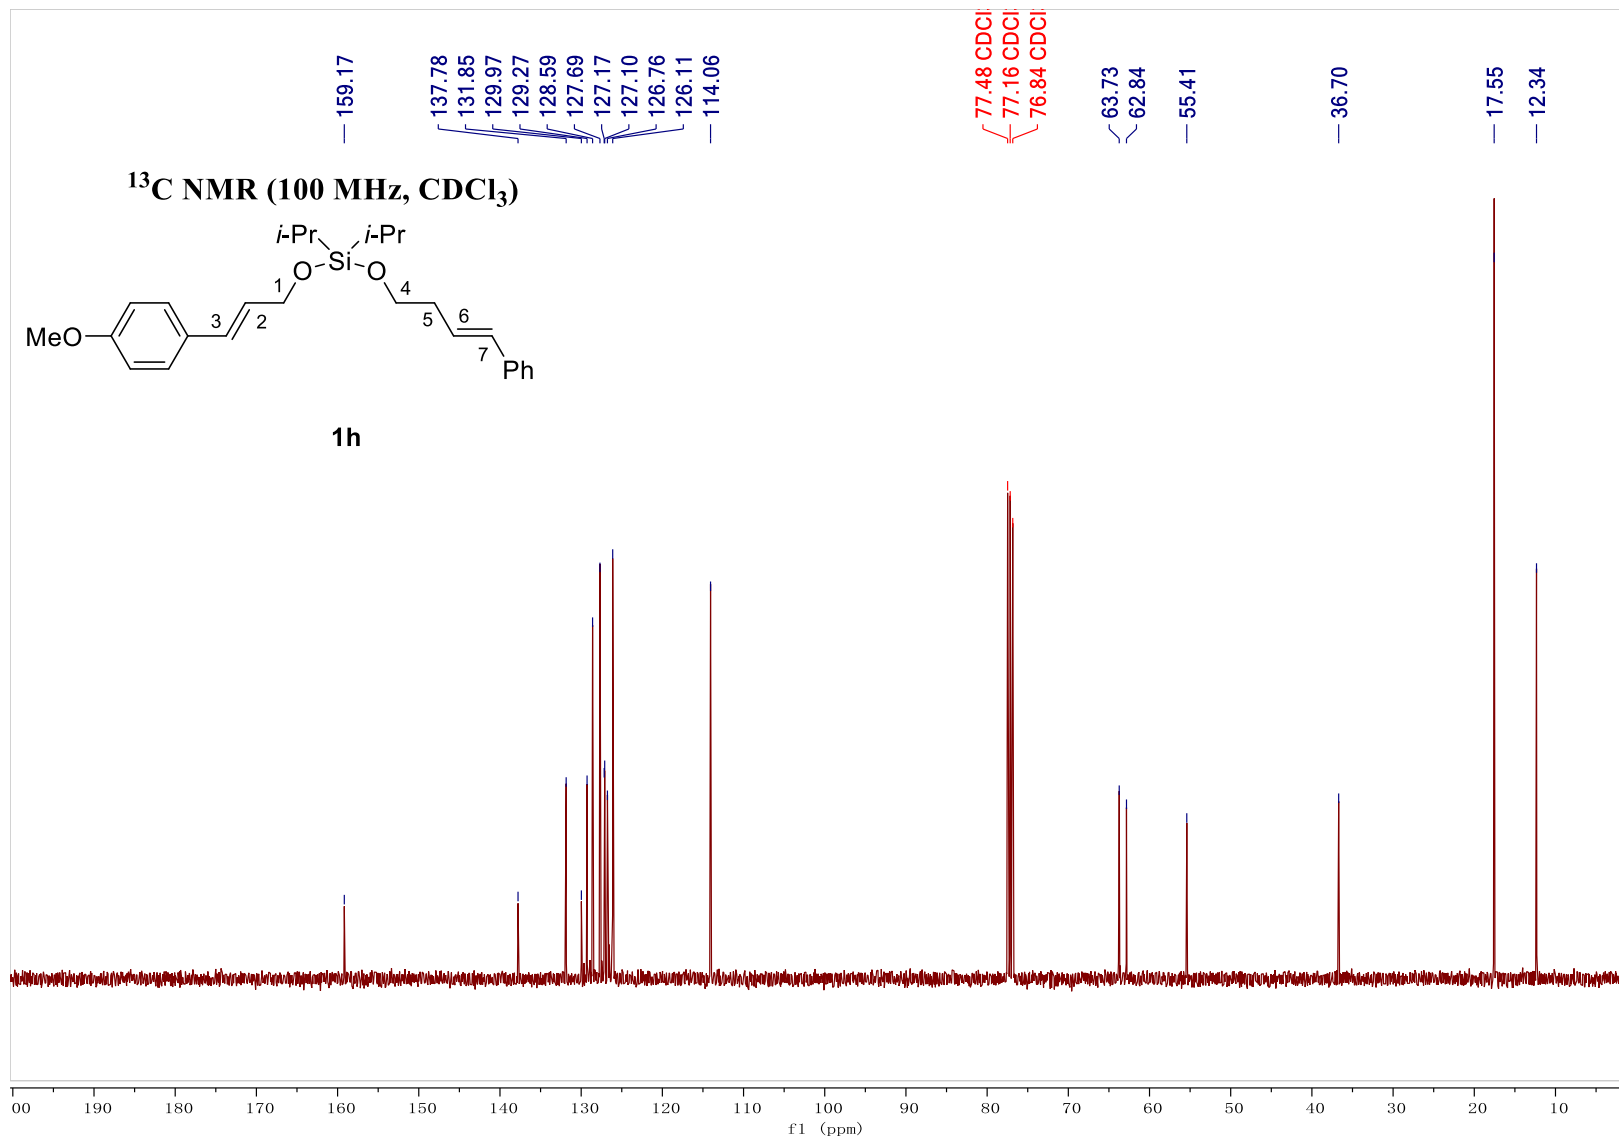

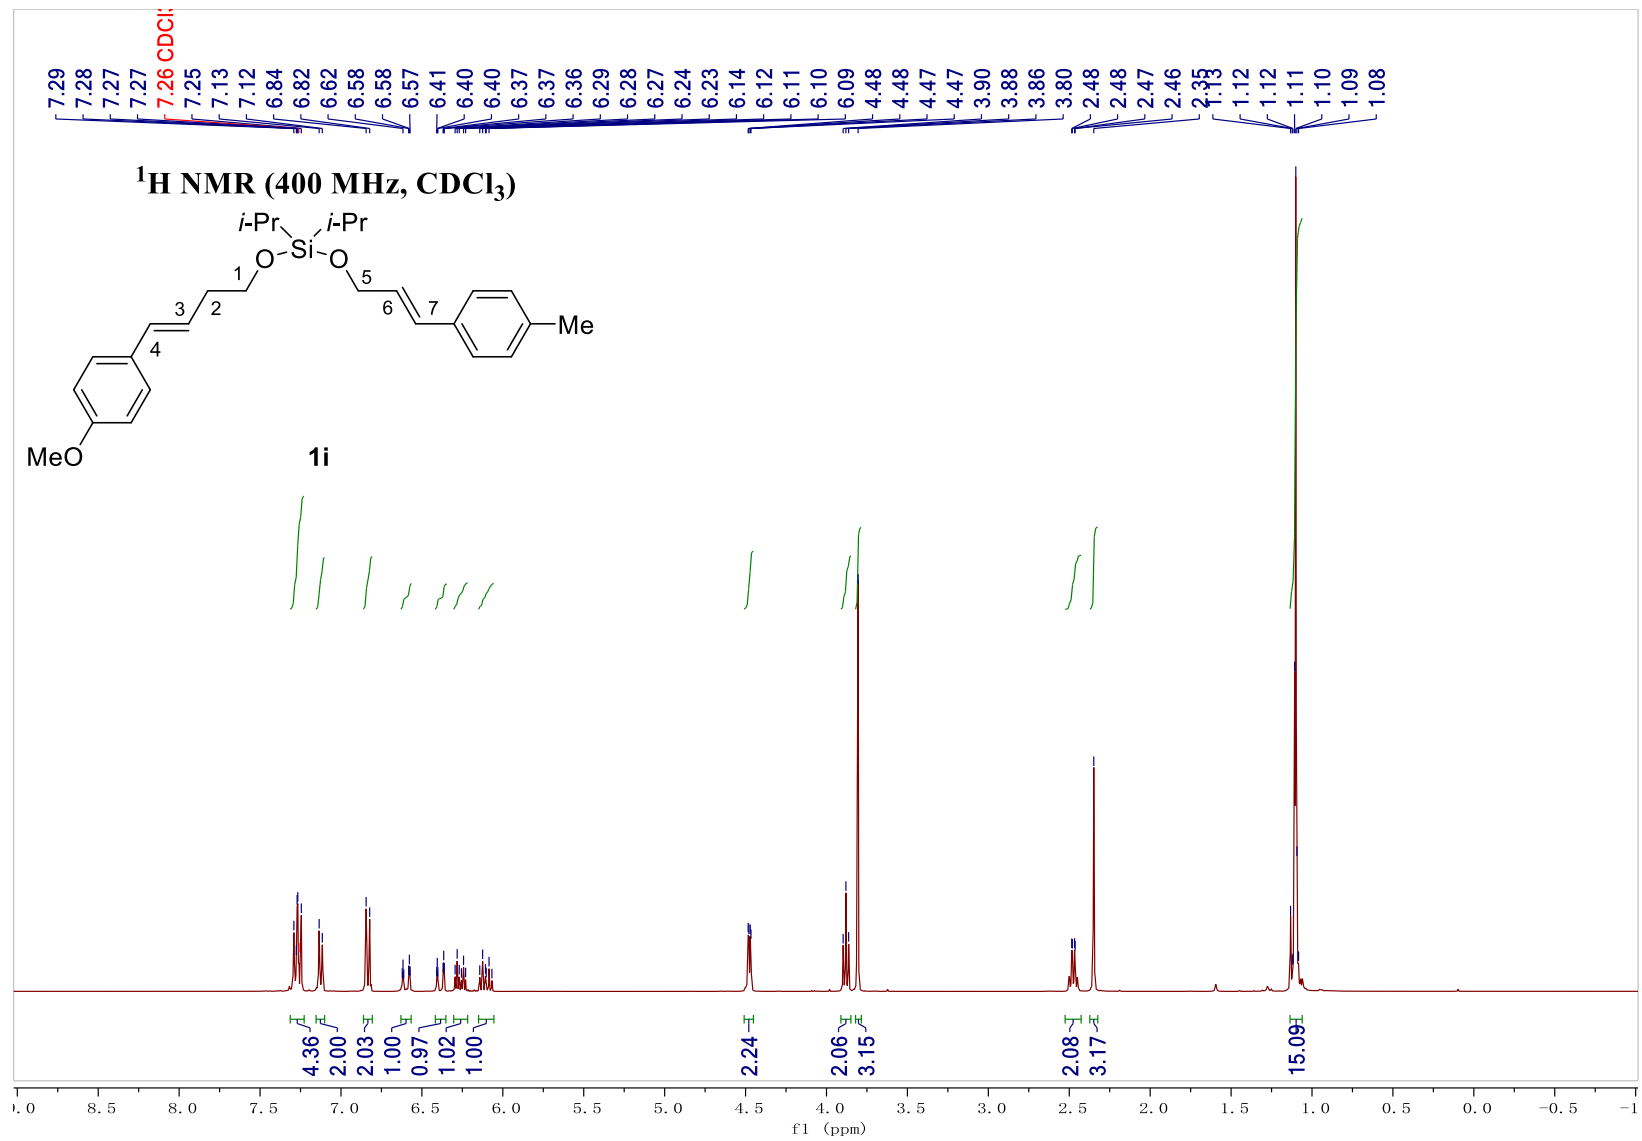

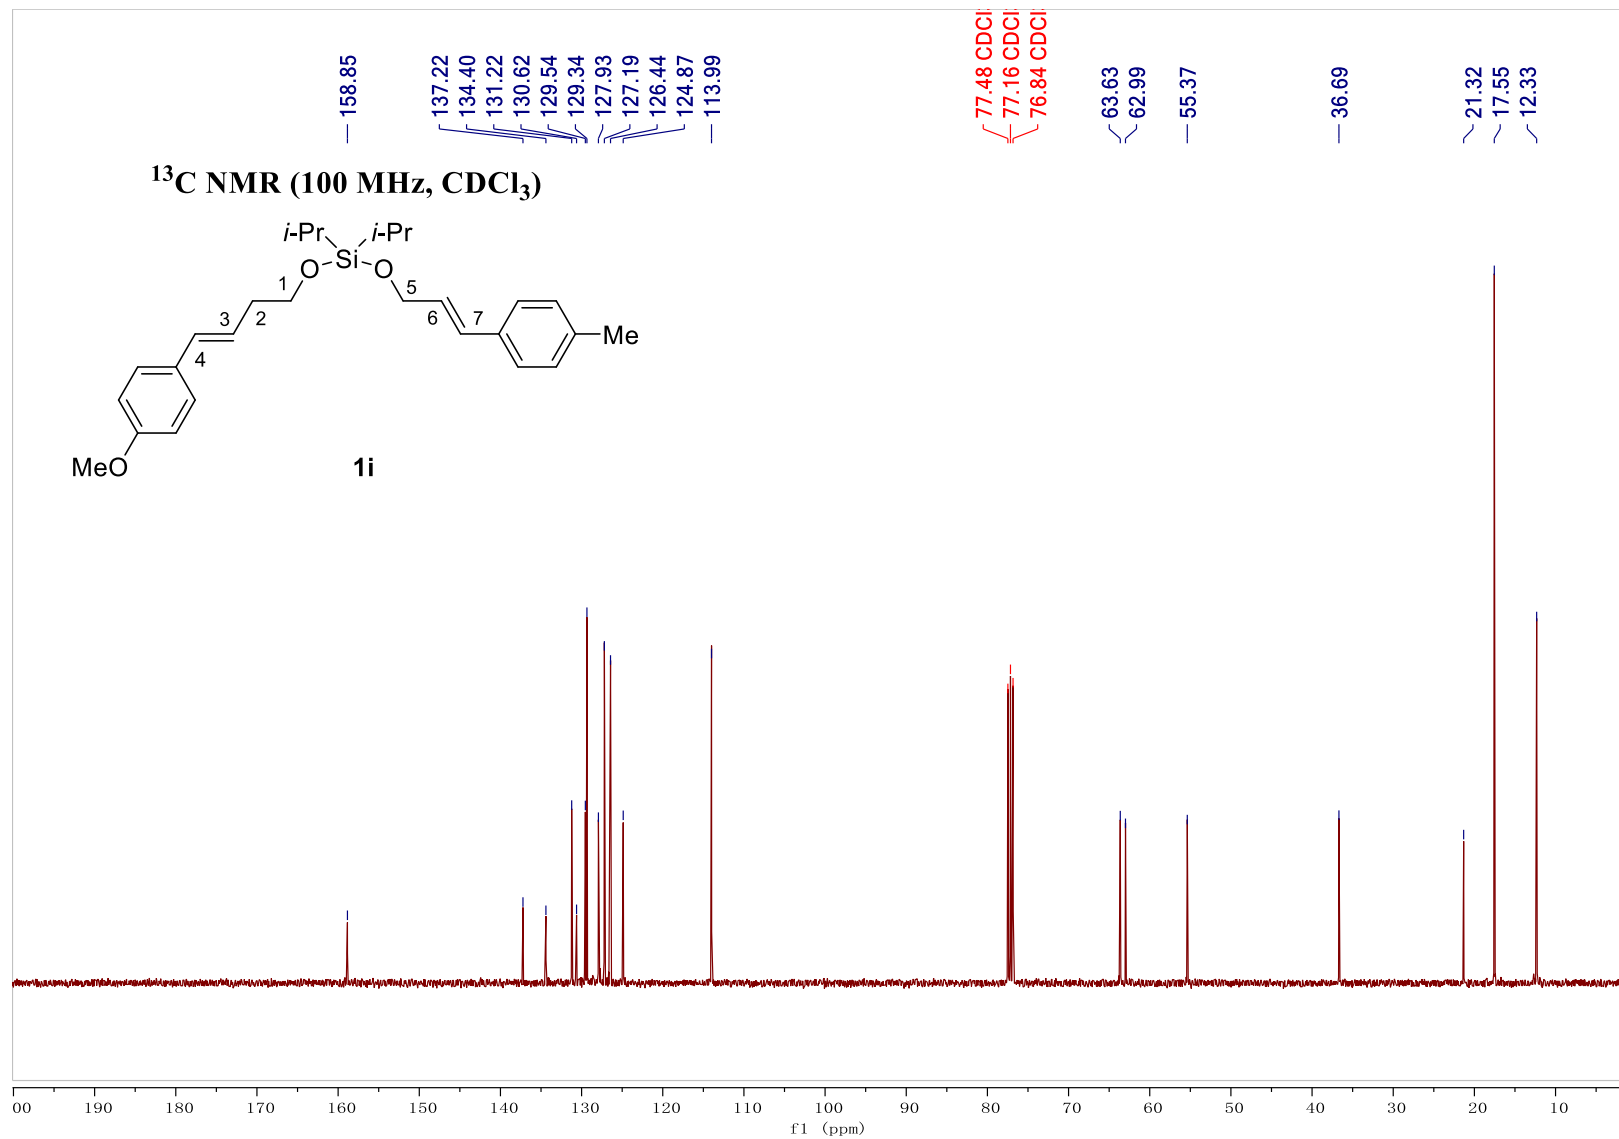

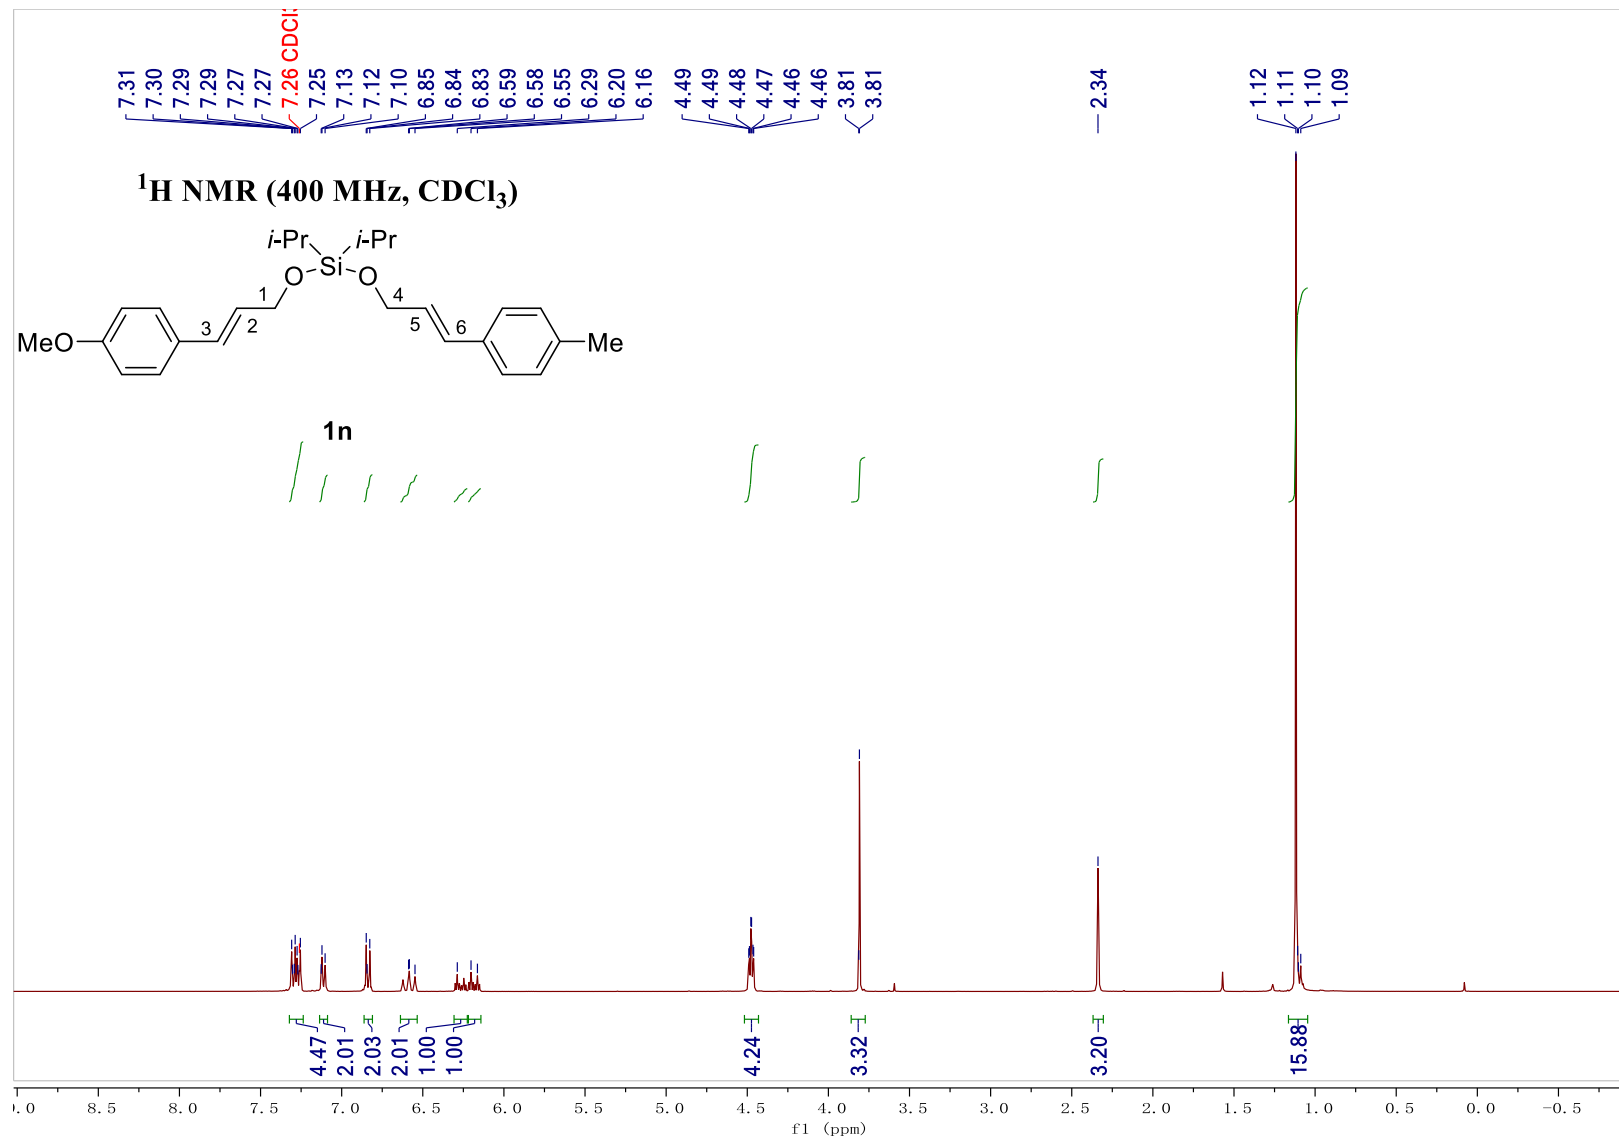

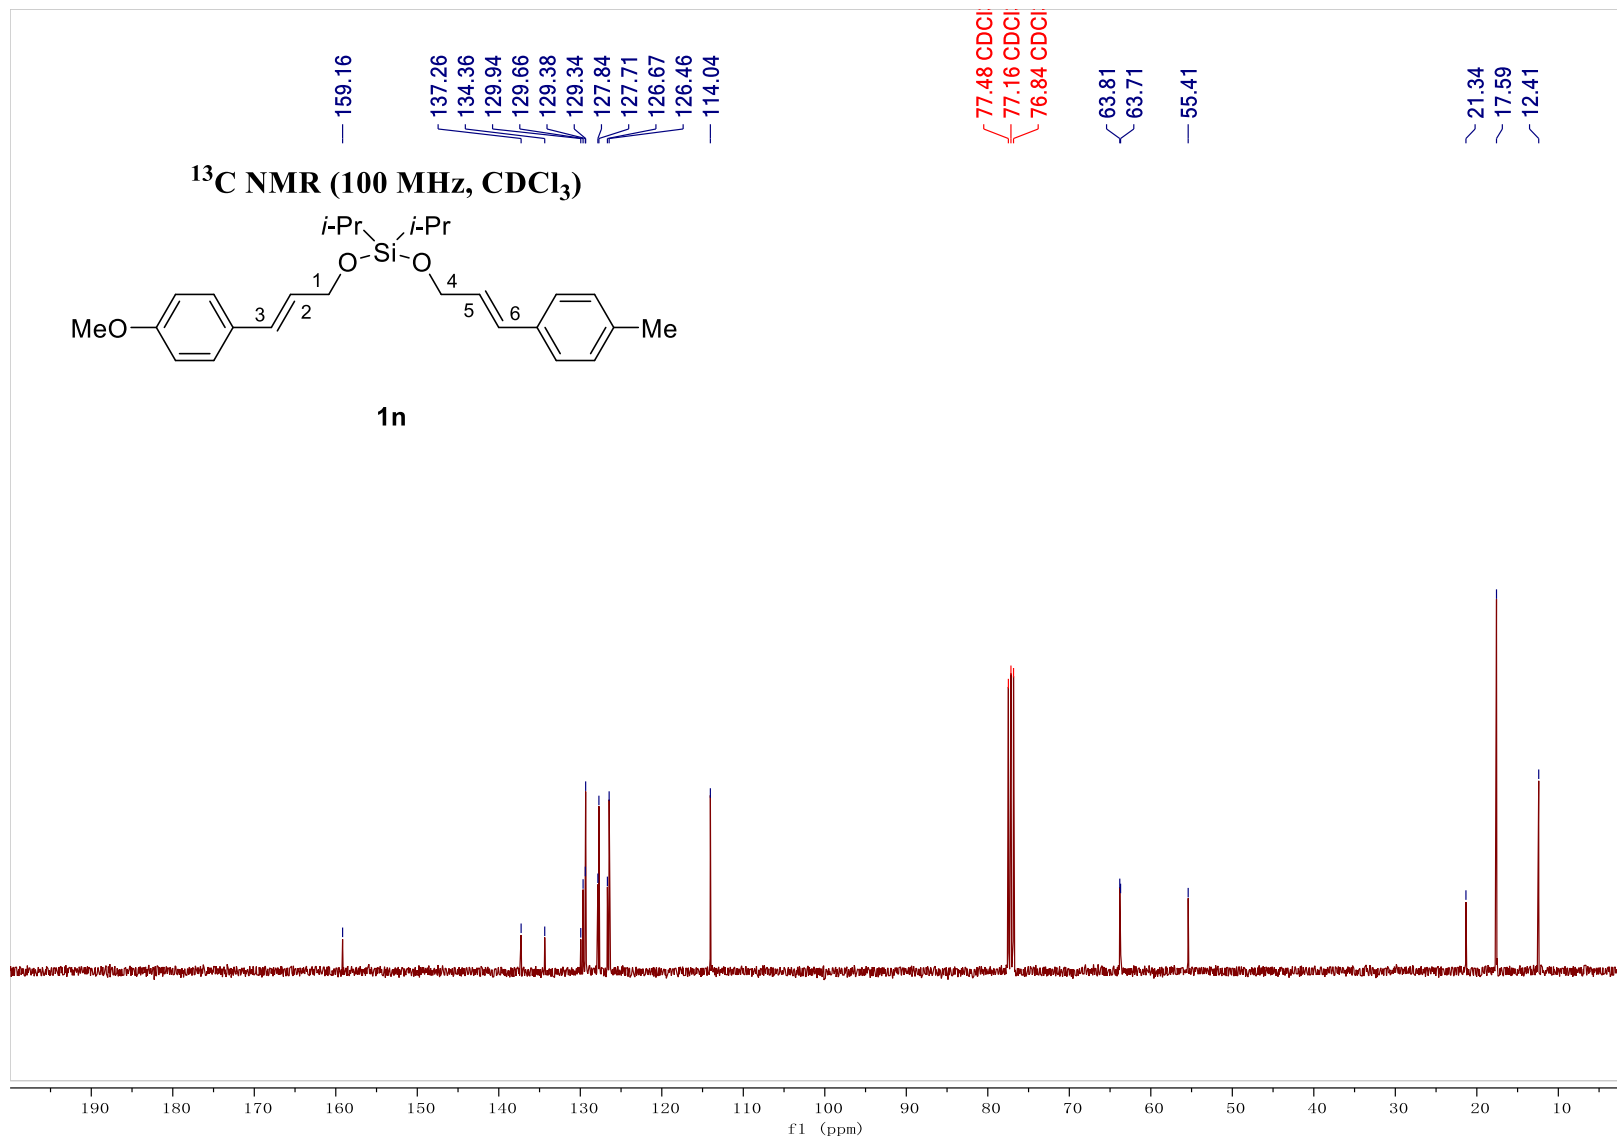

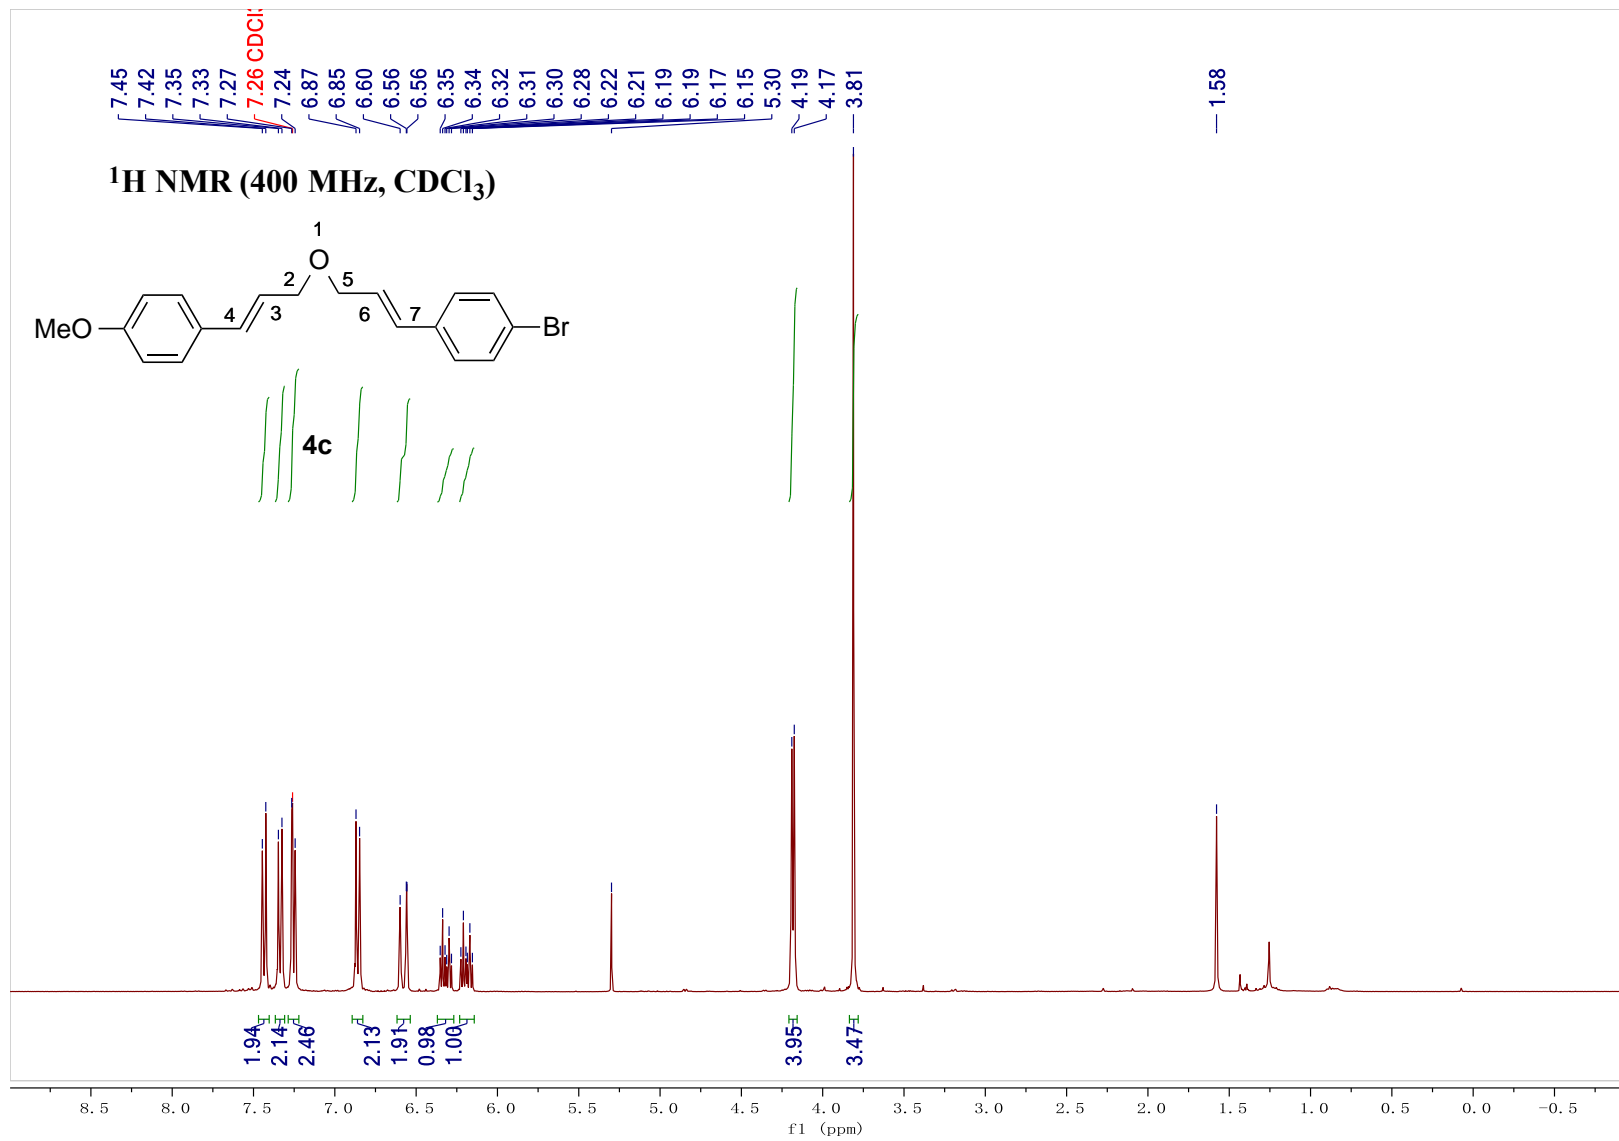

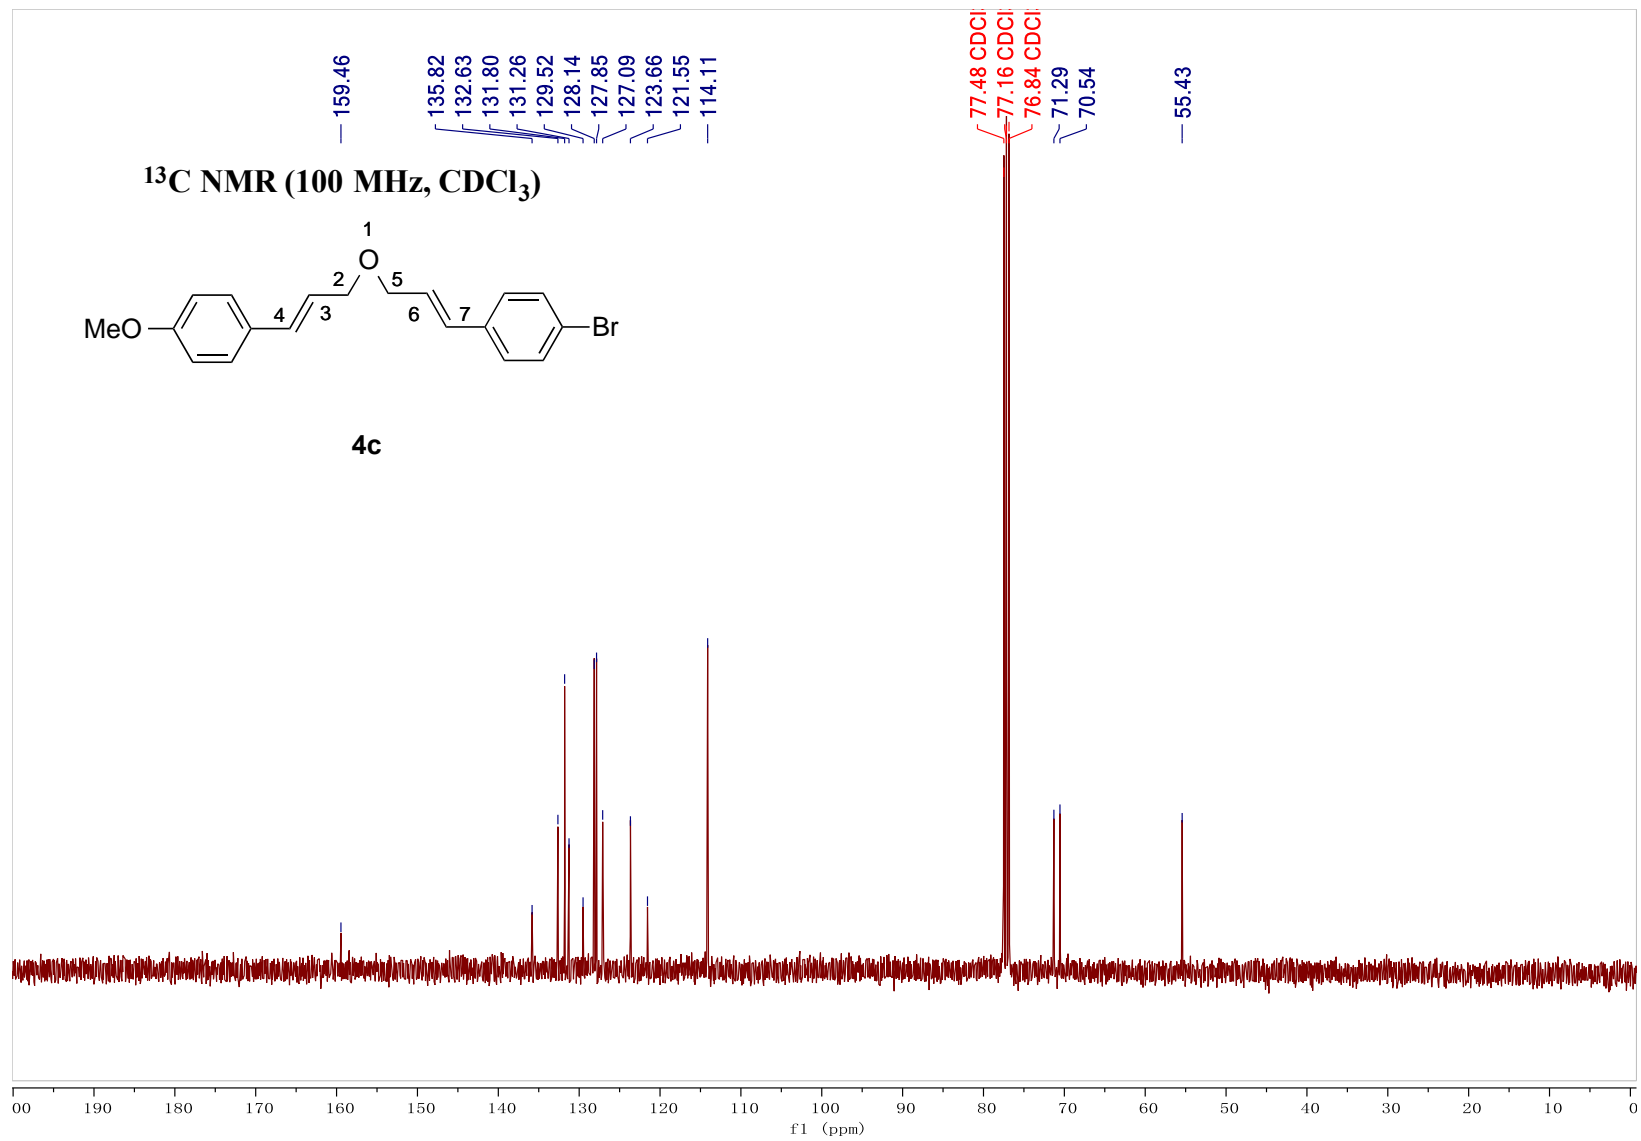

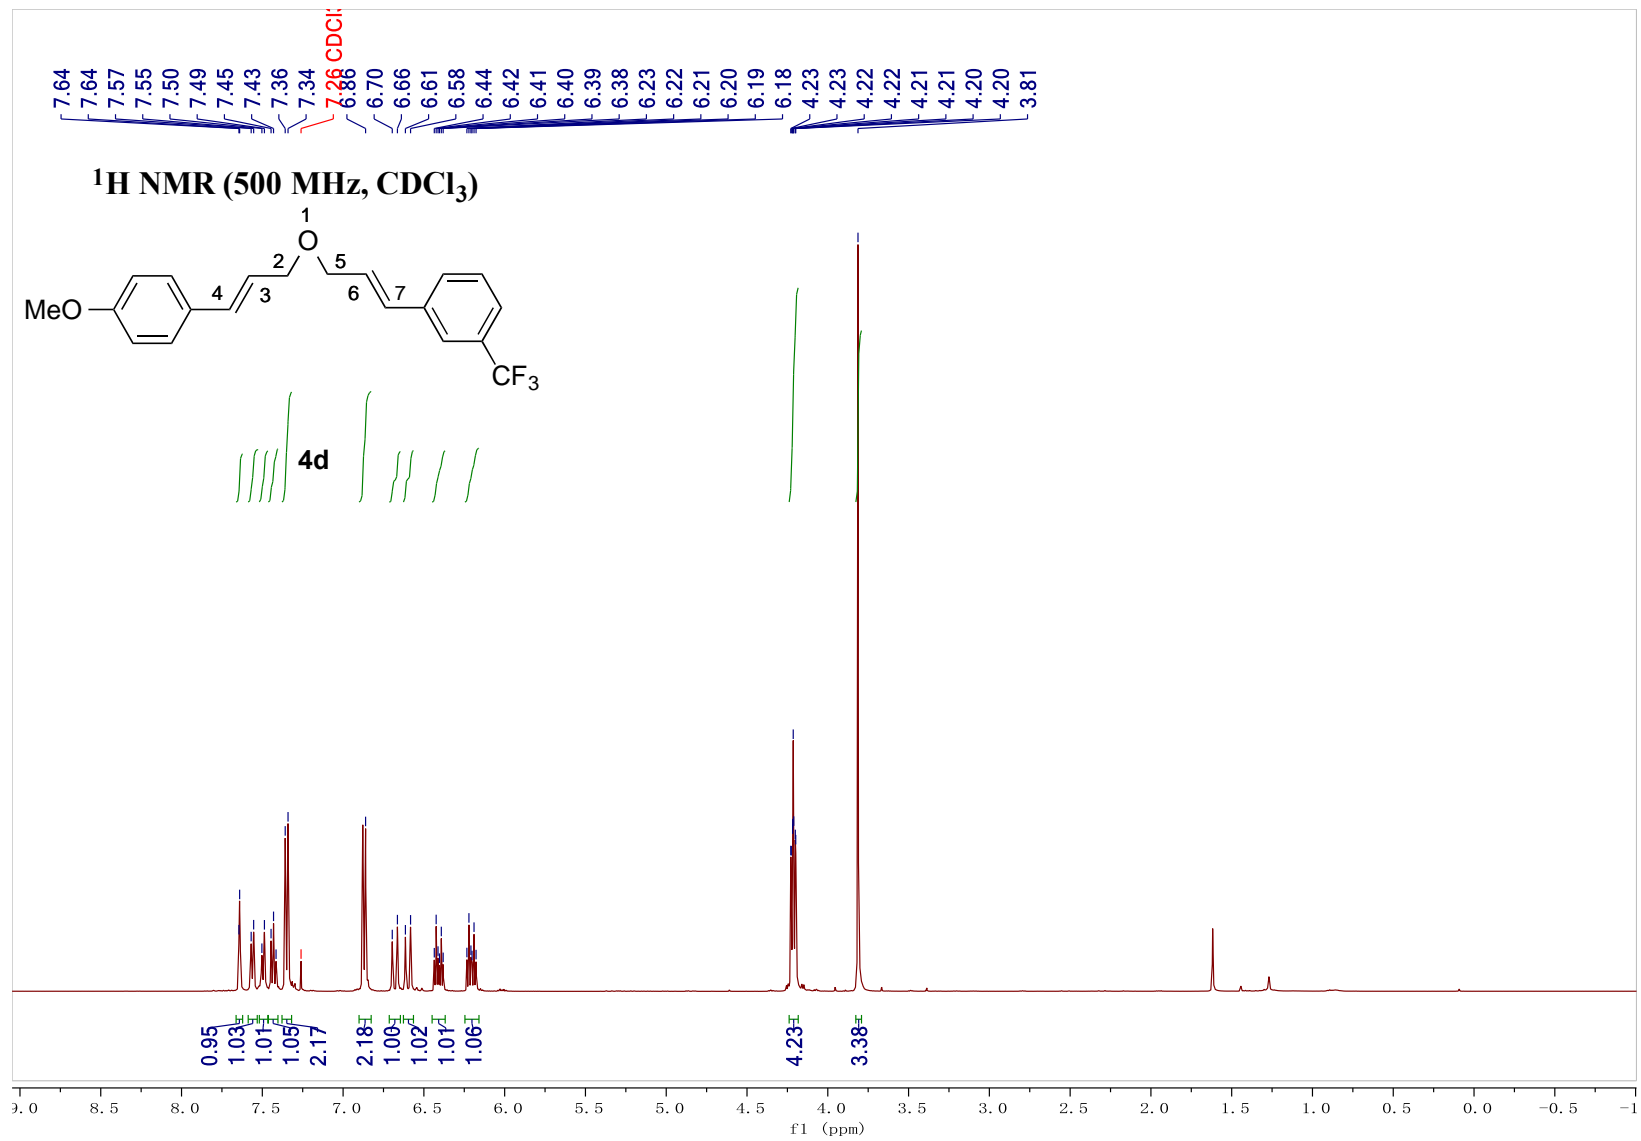



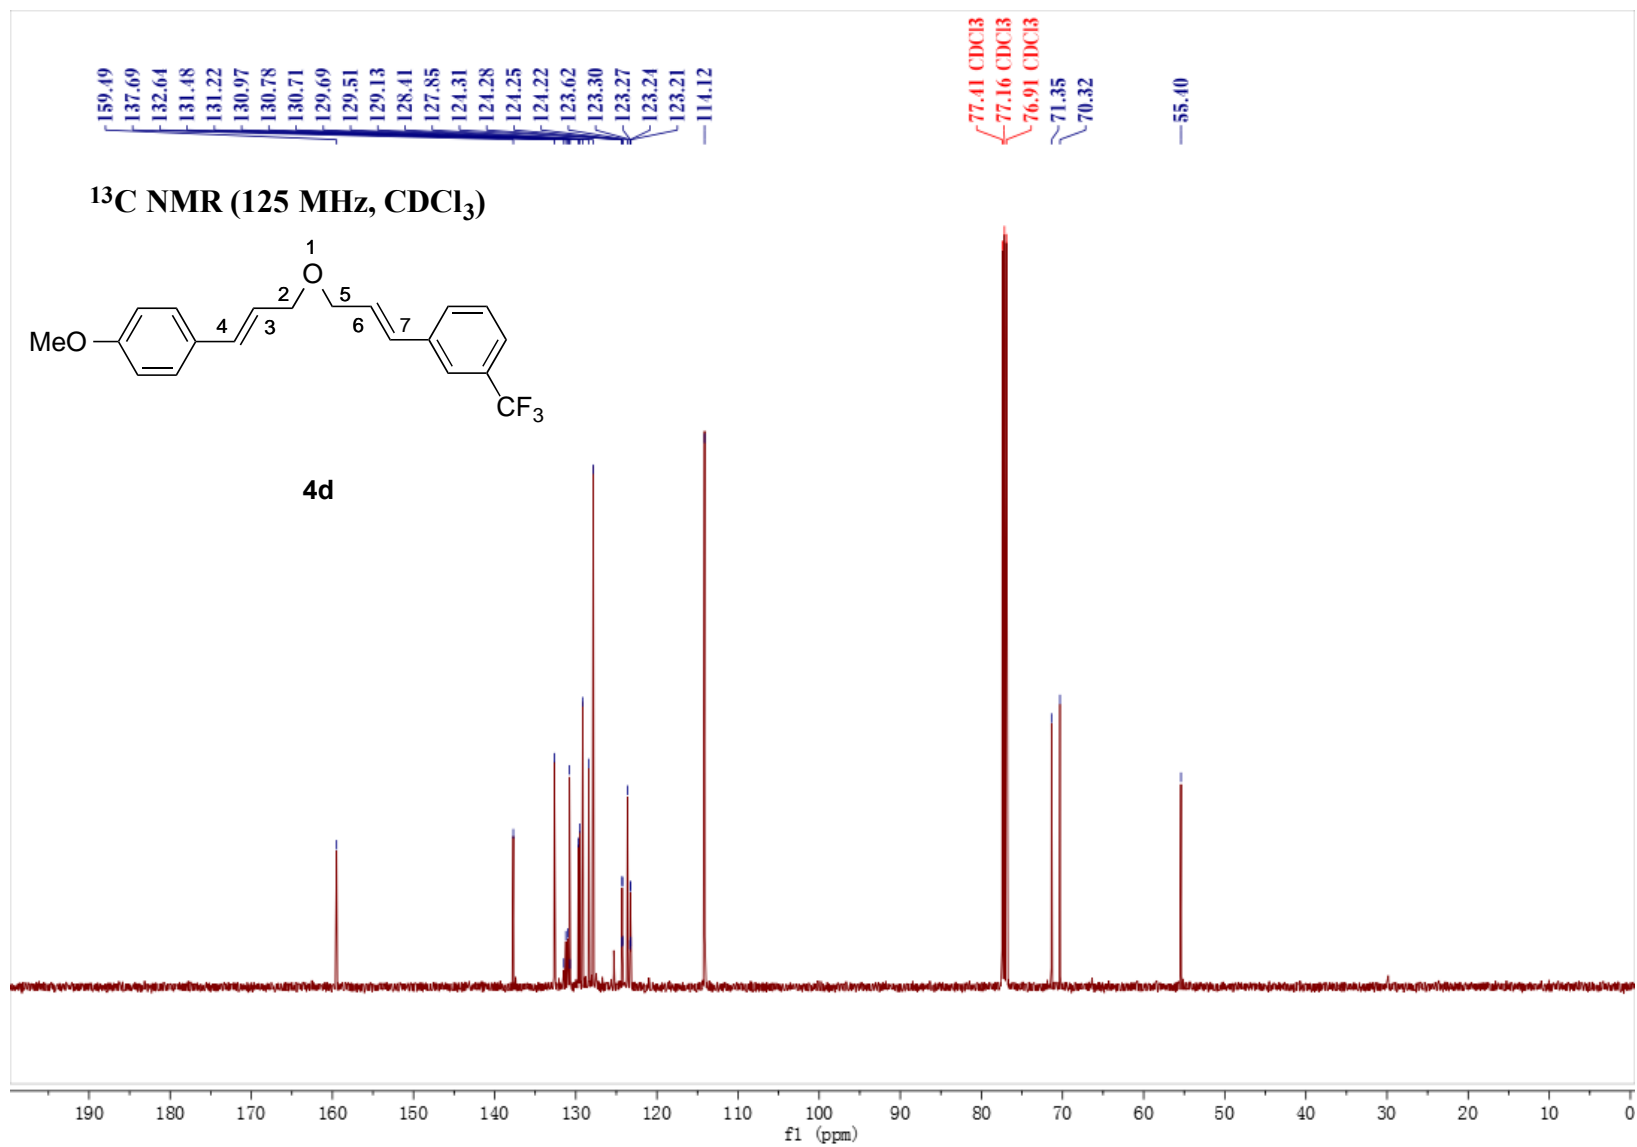

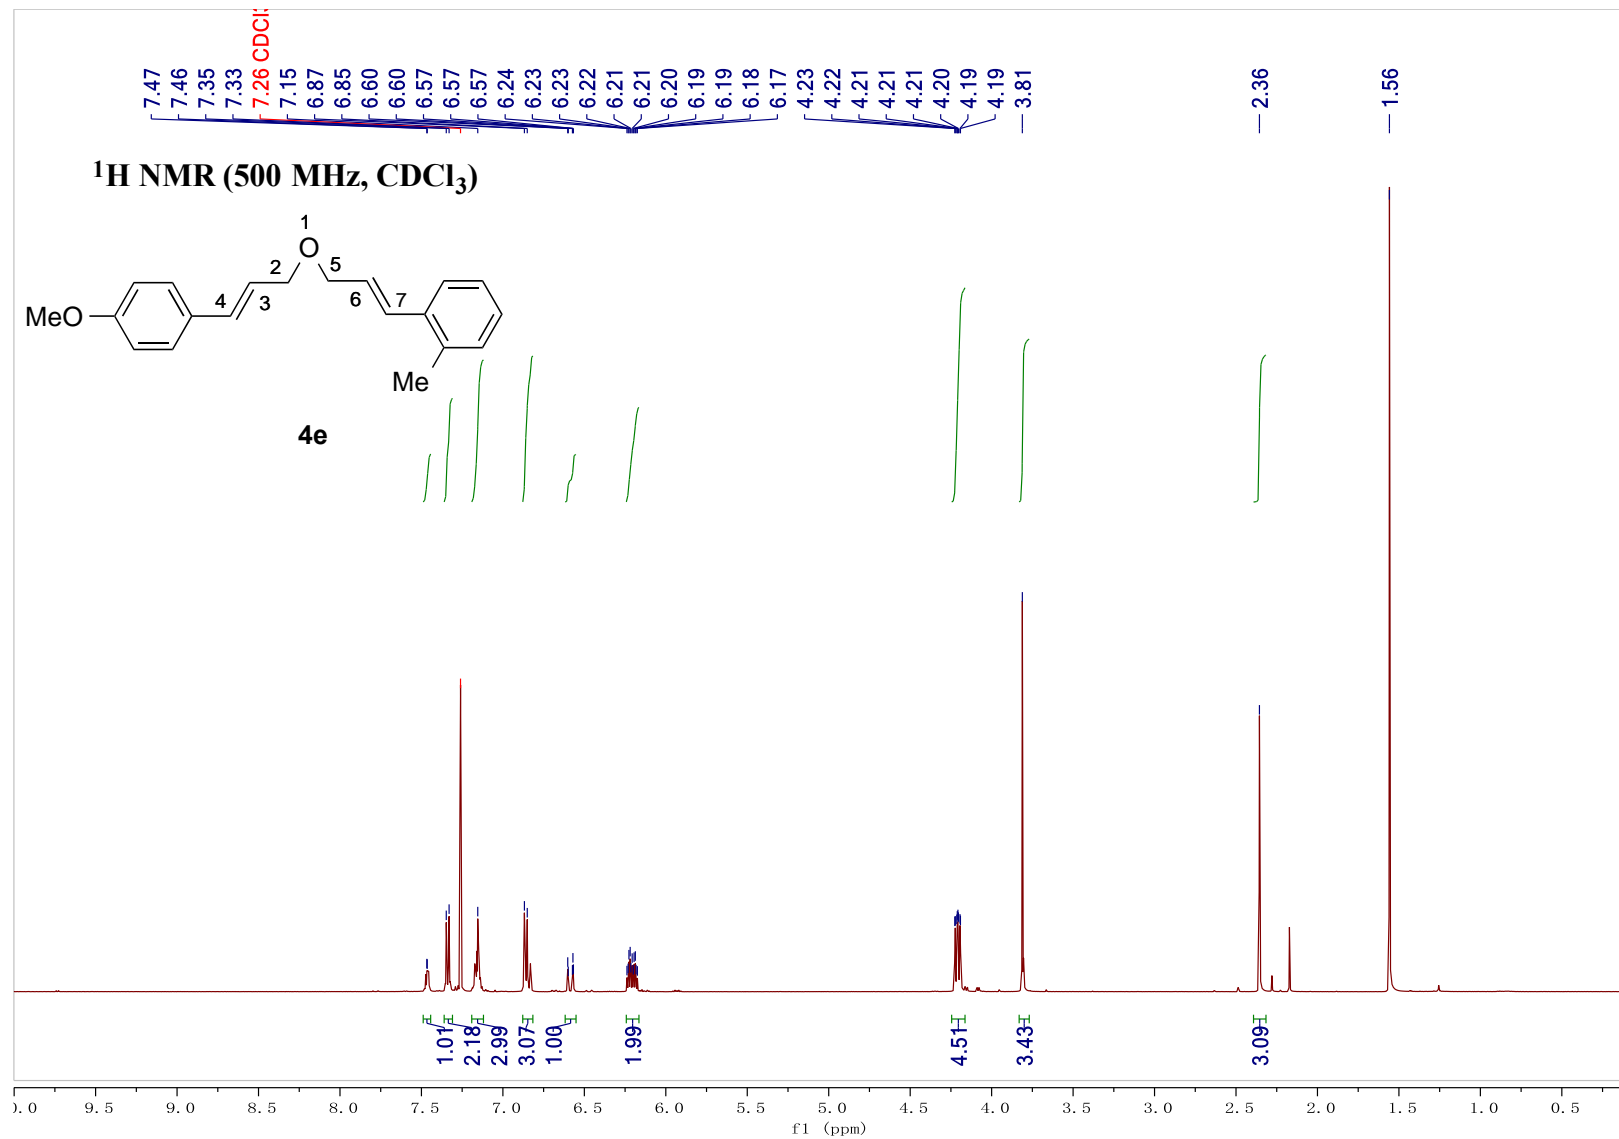

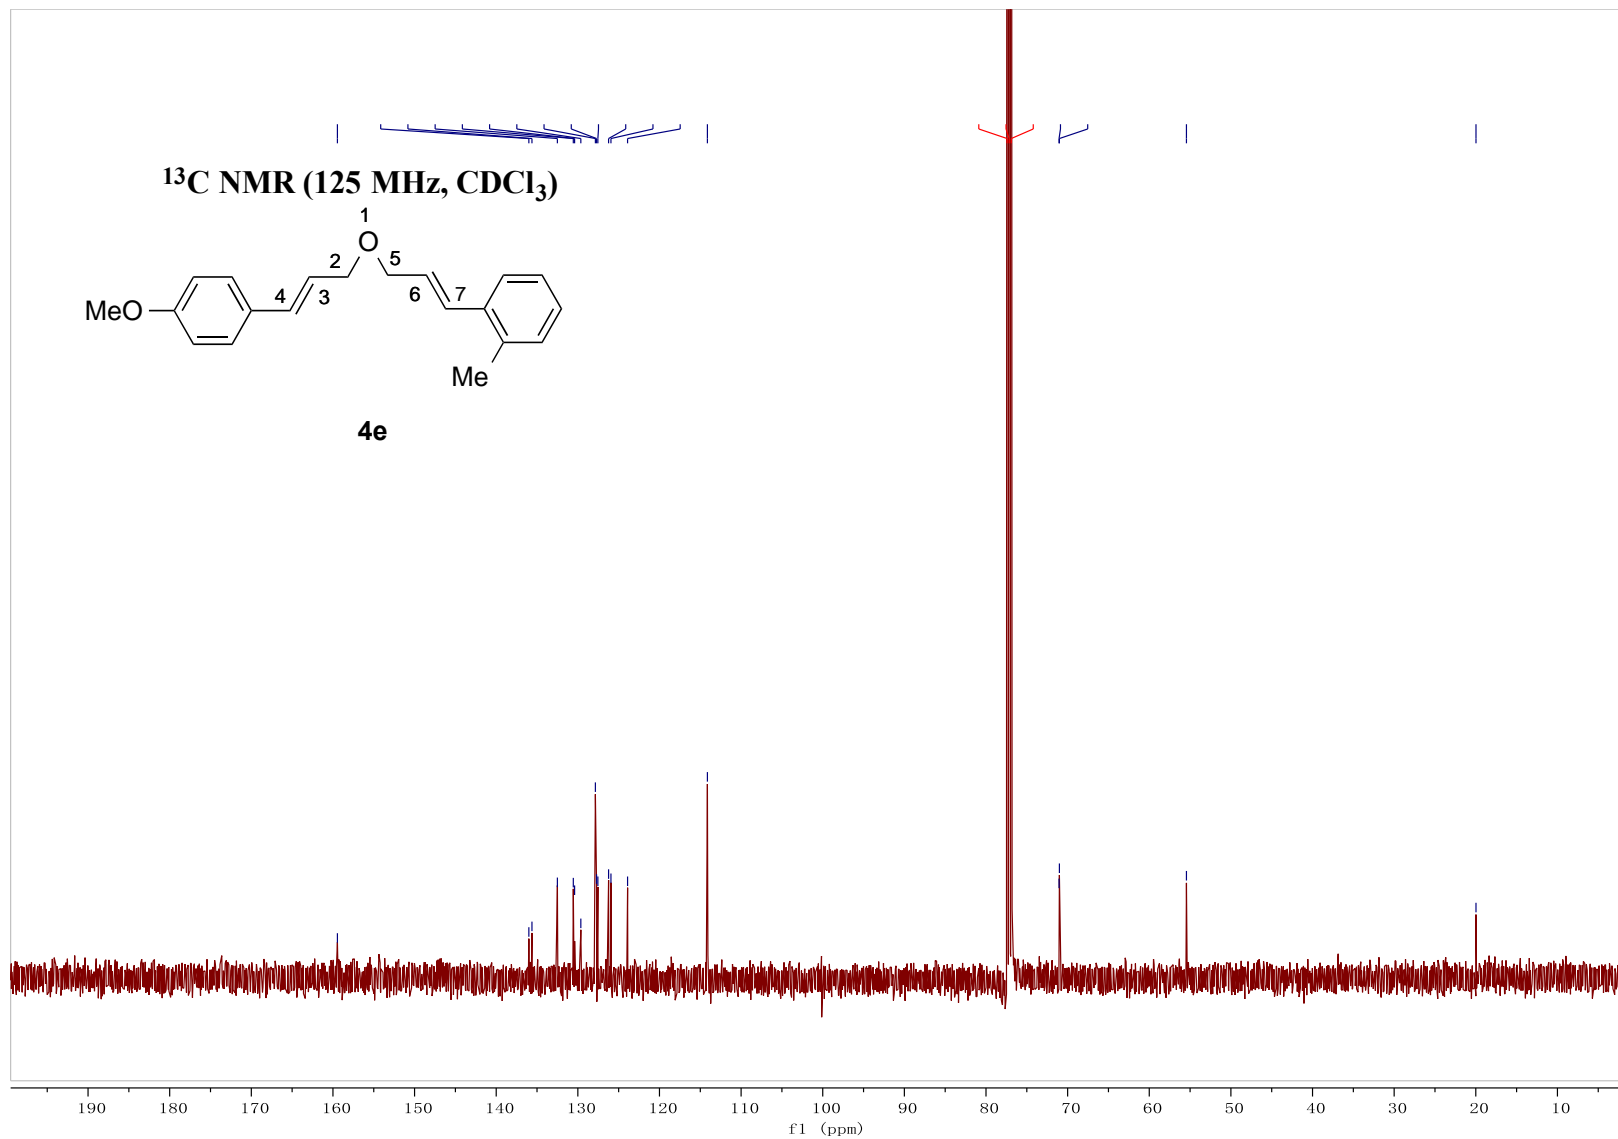

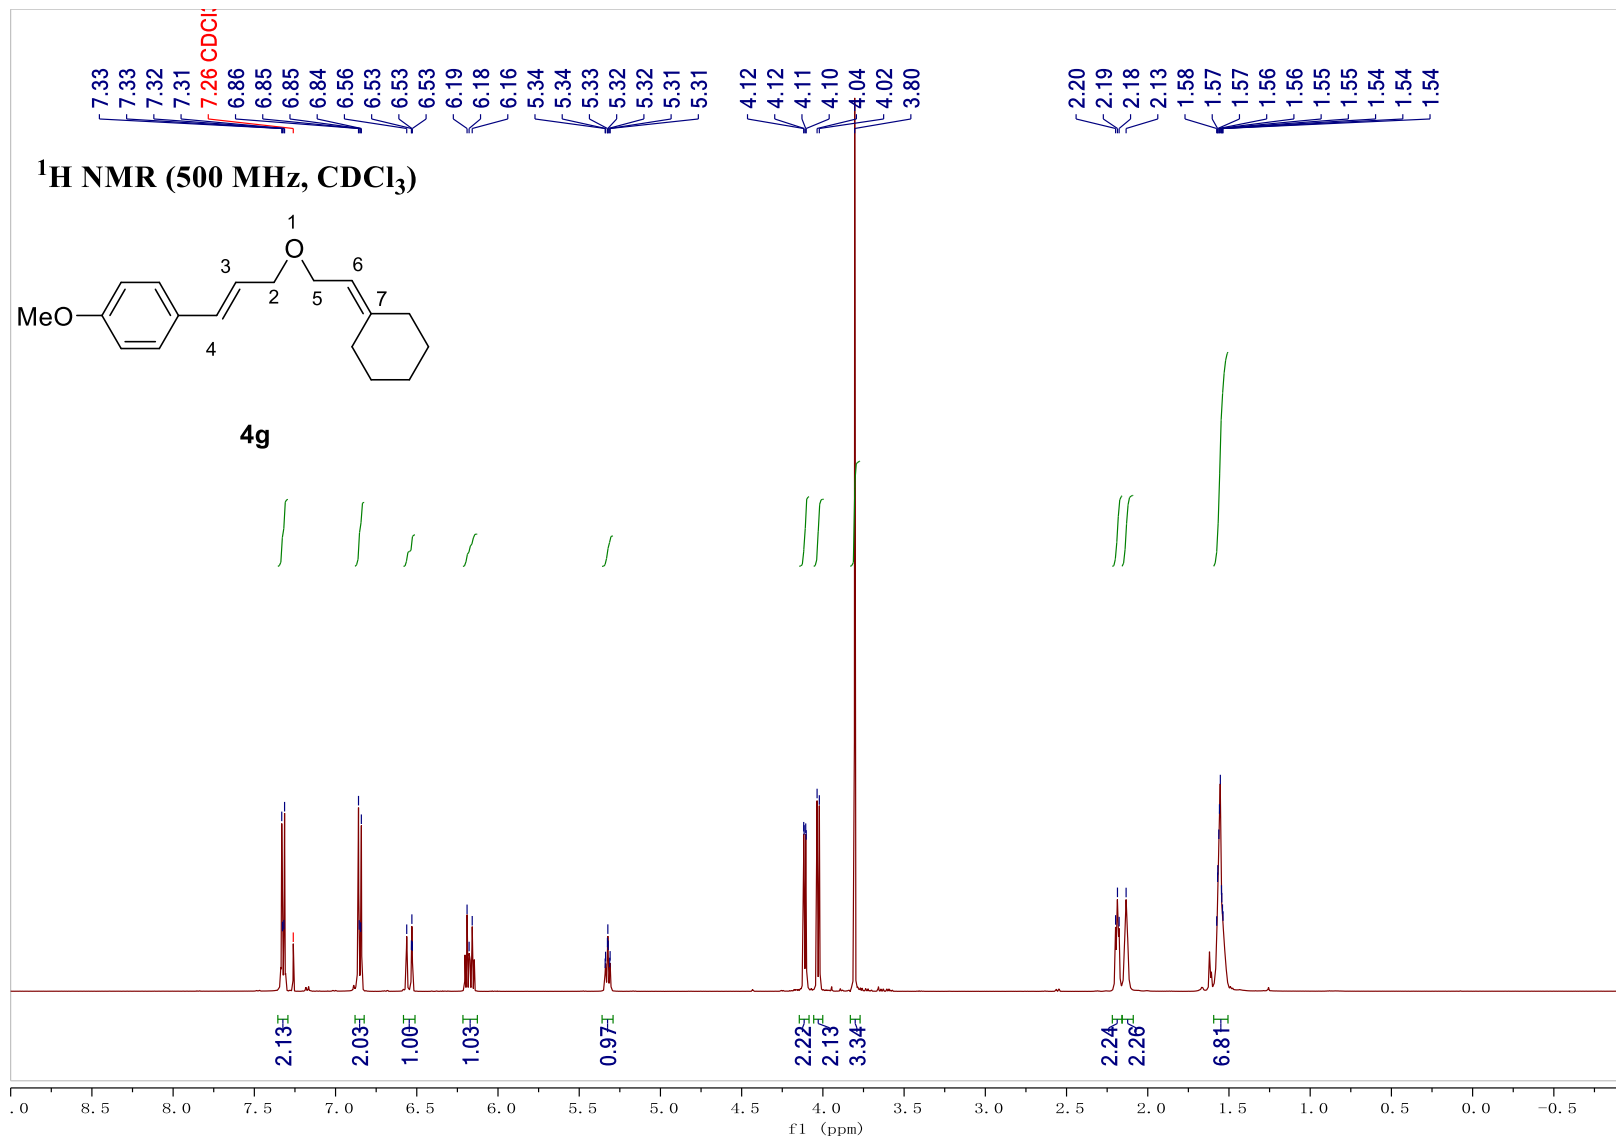

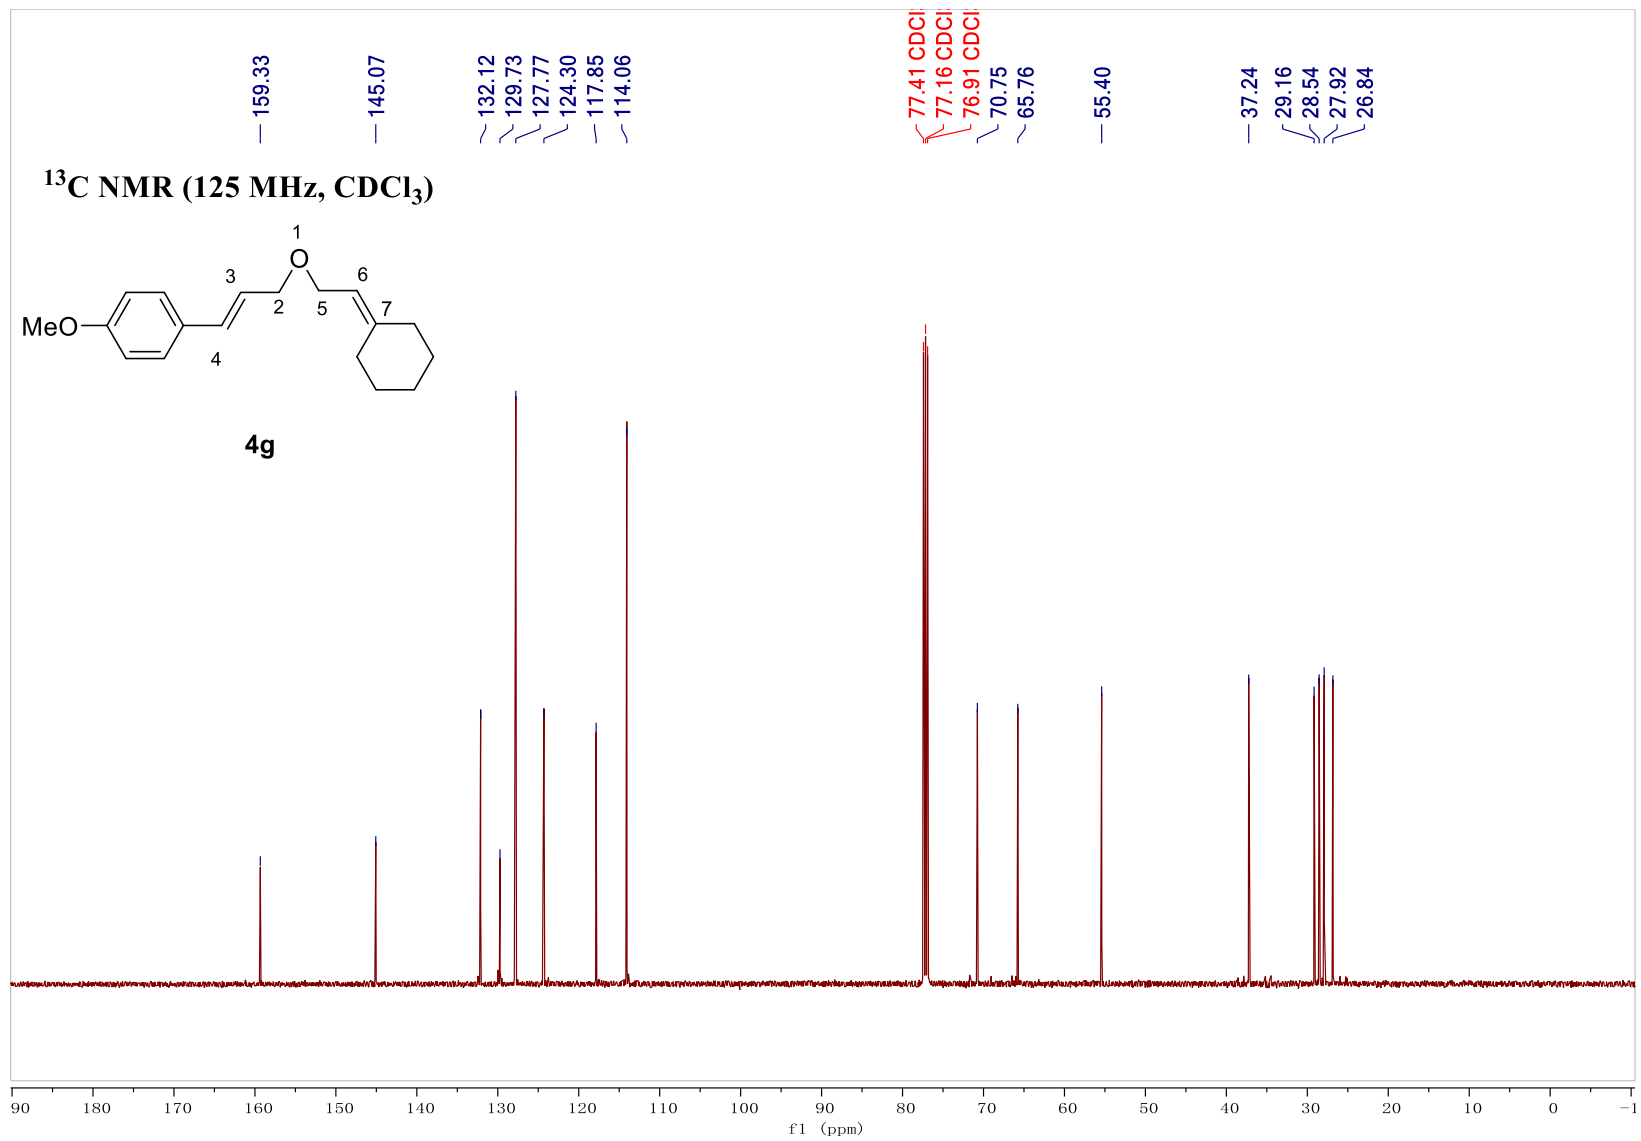

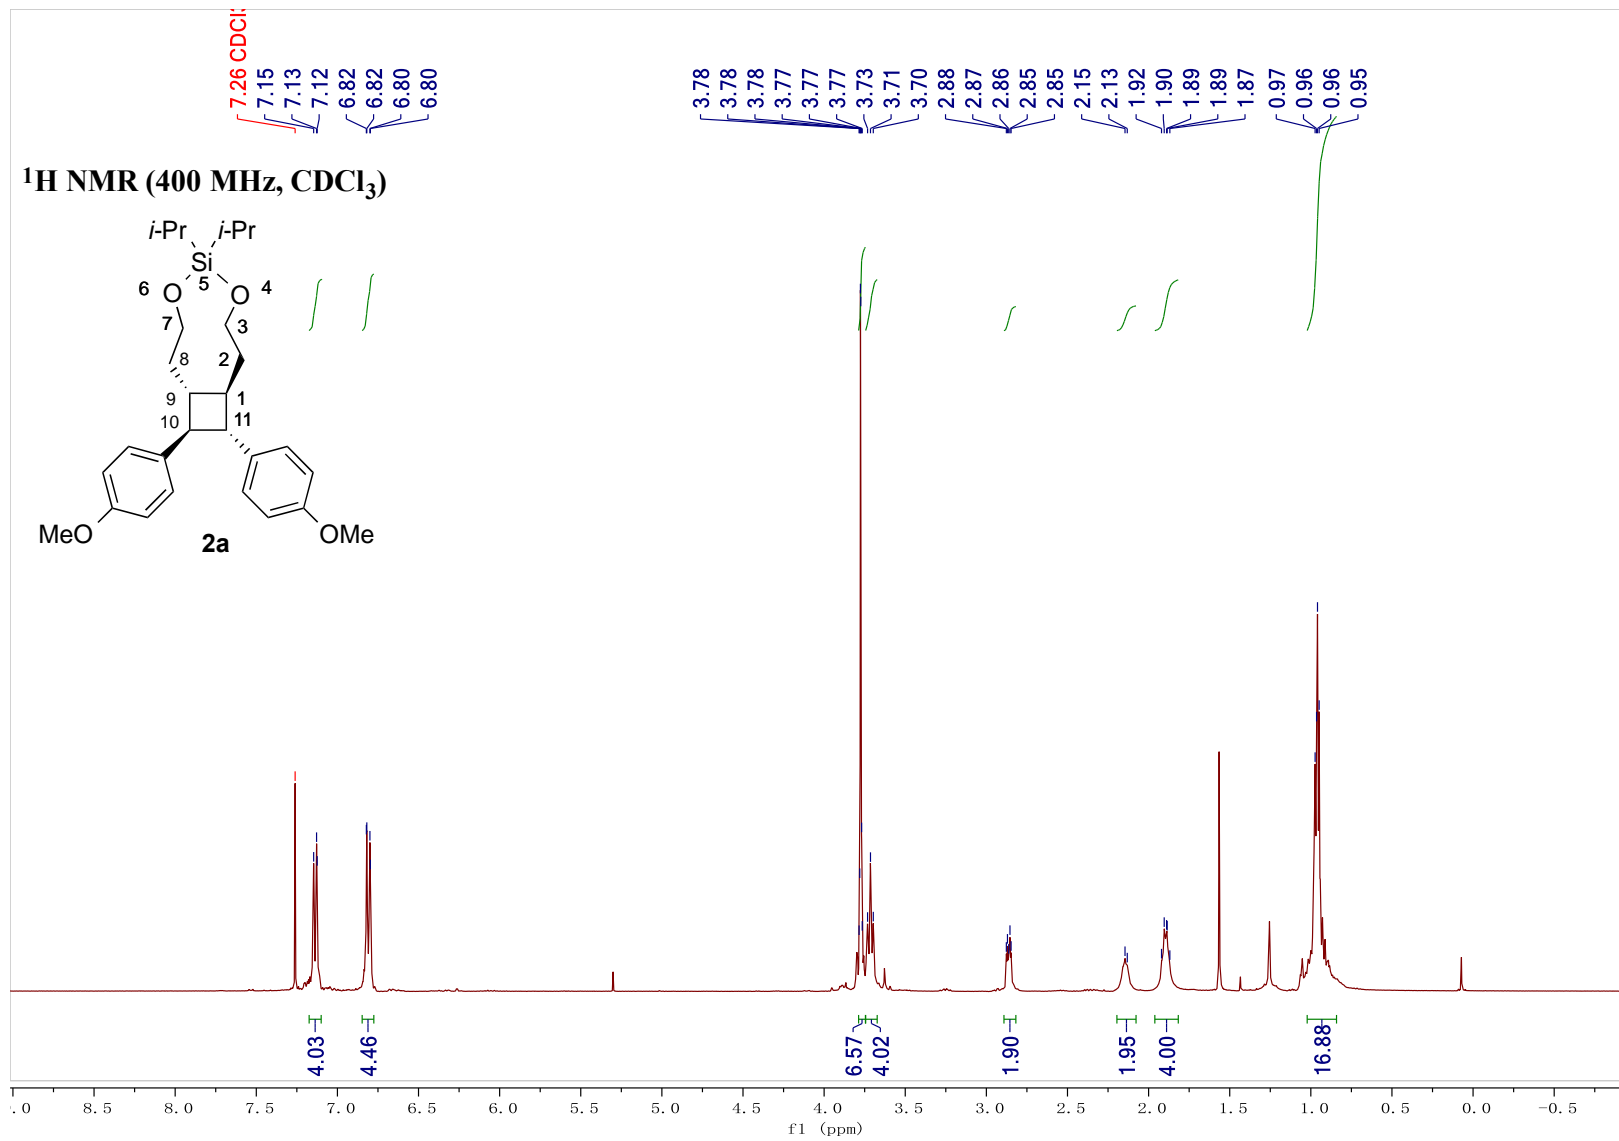

**<sup>13</sup>C NMR (100 MHz, CDCl<sub>3</sub>)**

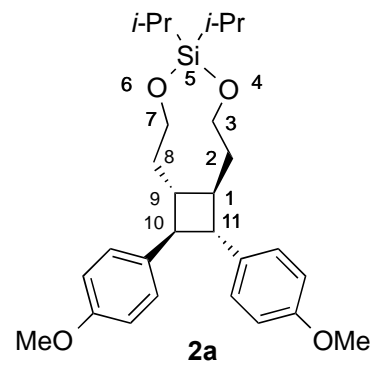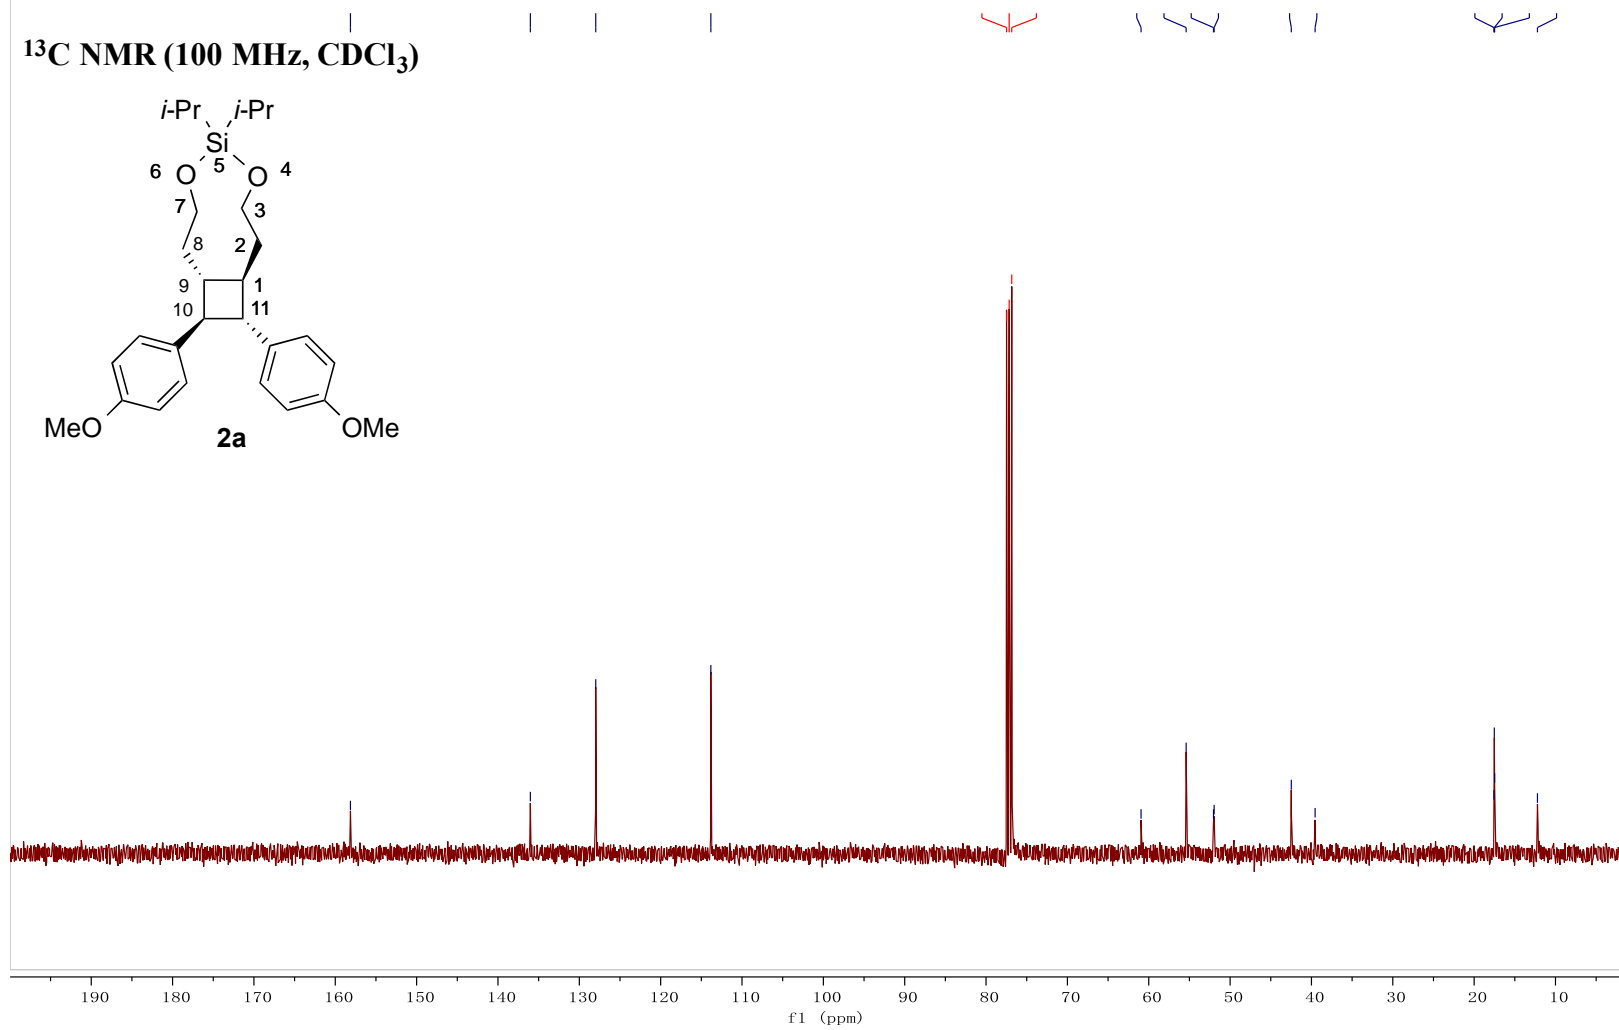

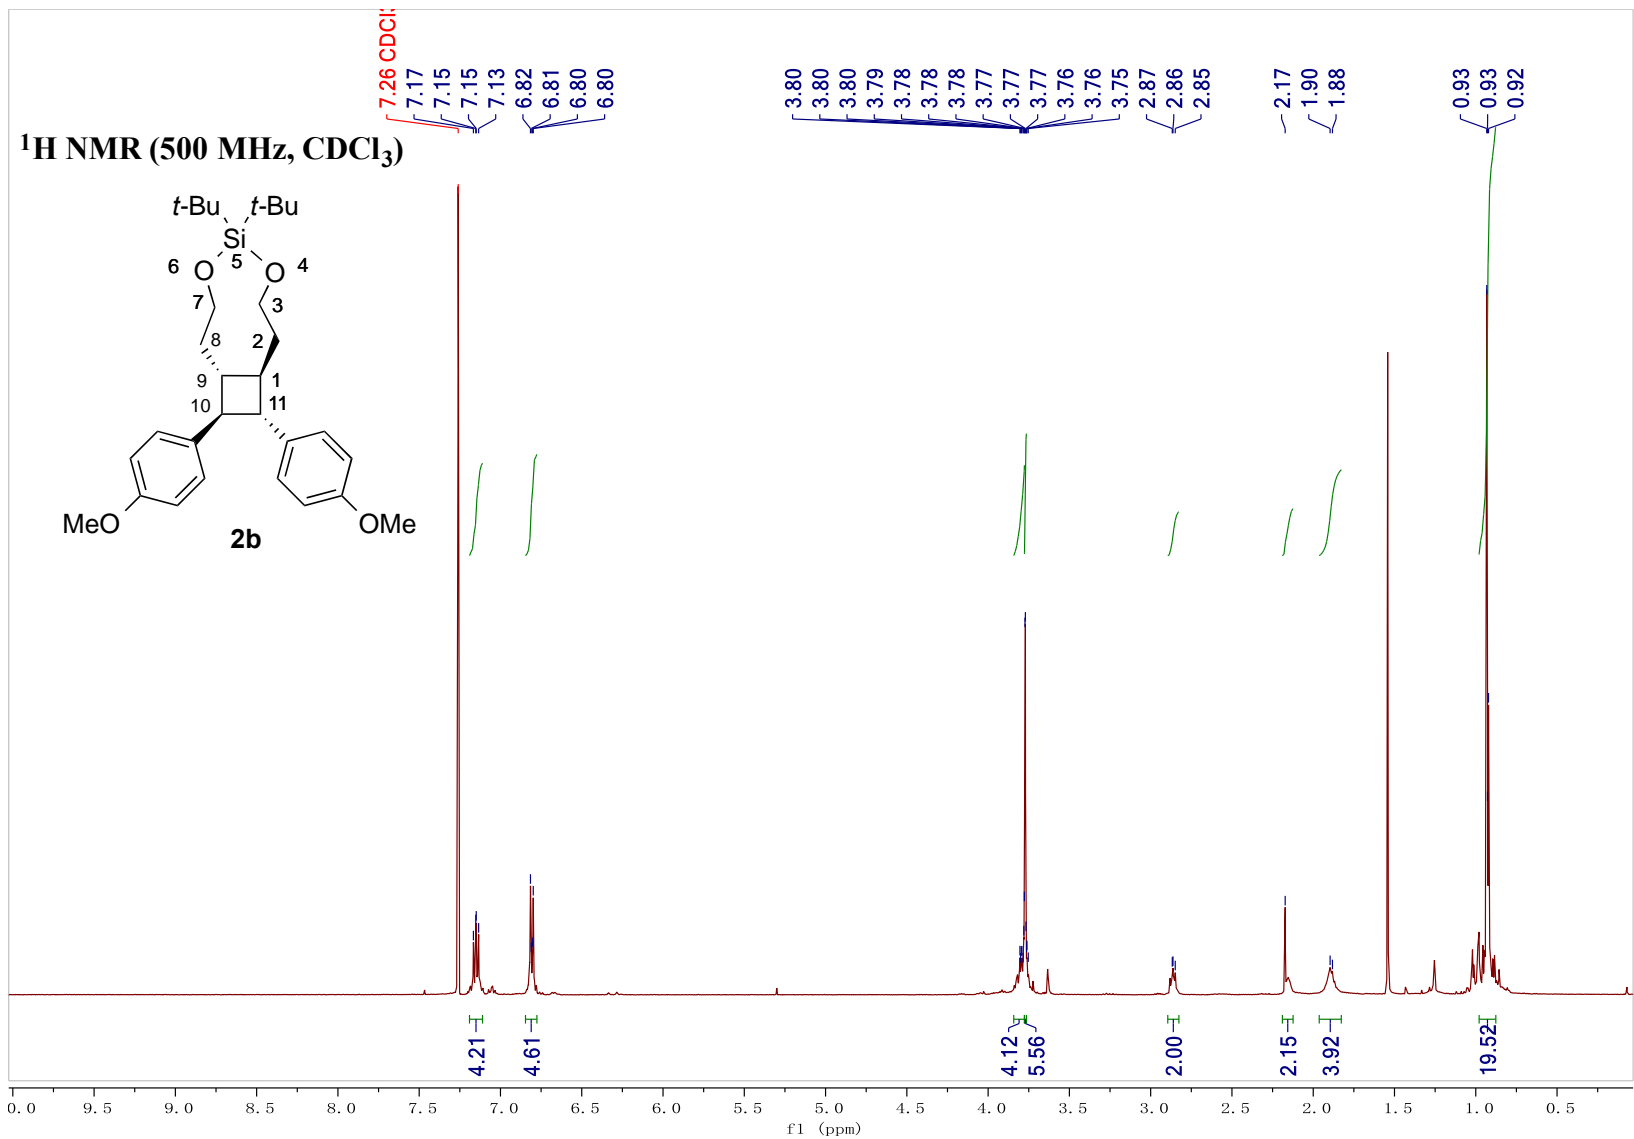



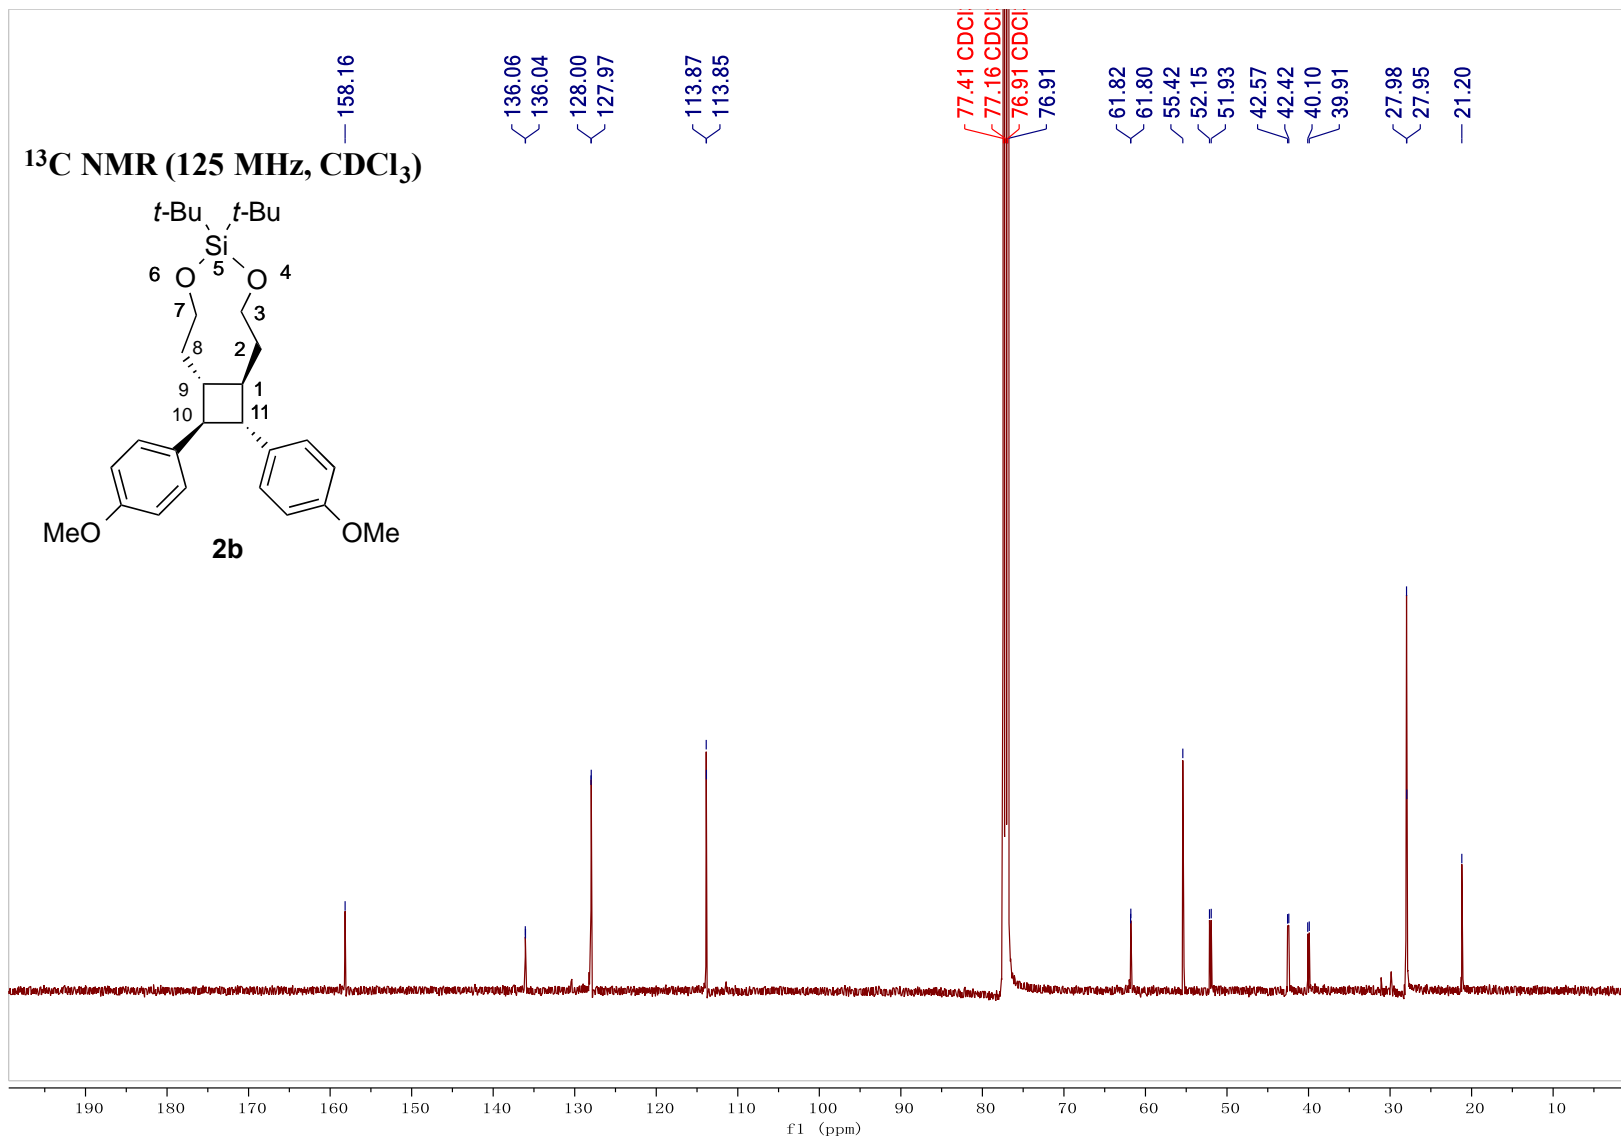

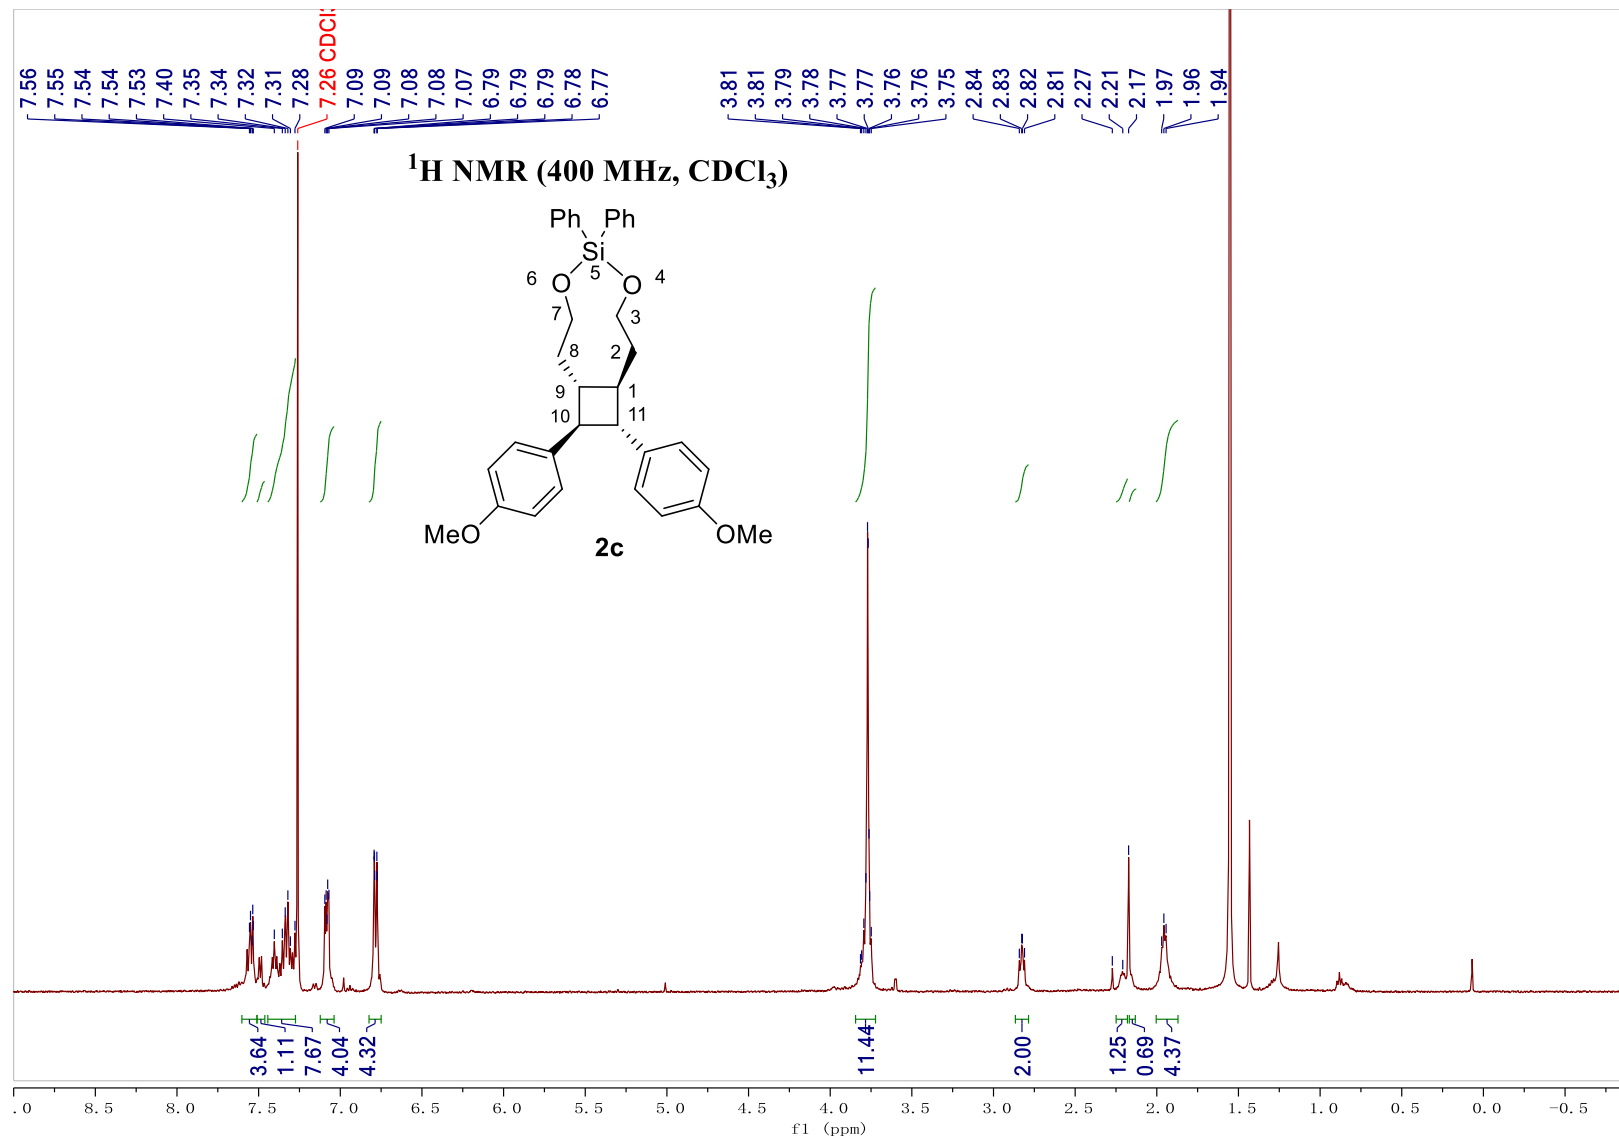

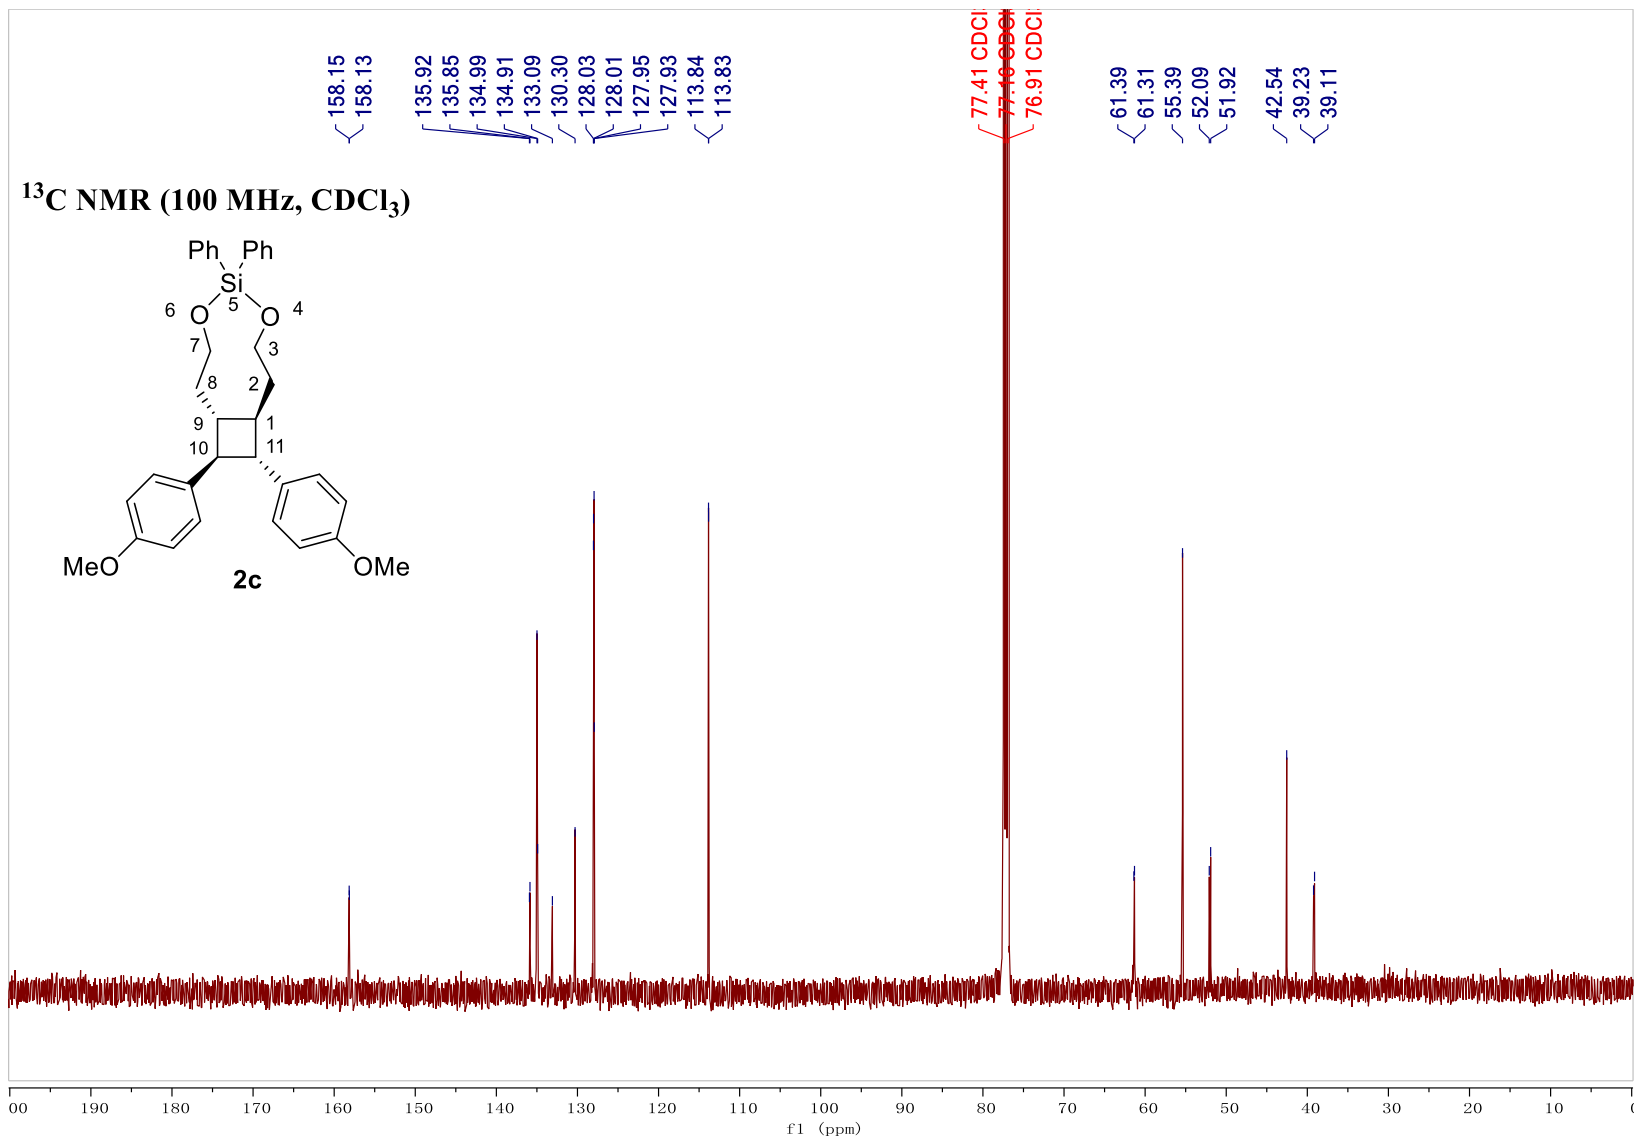

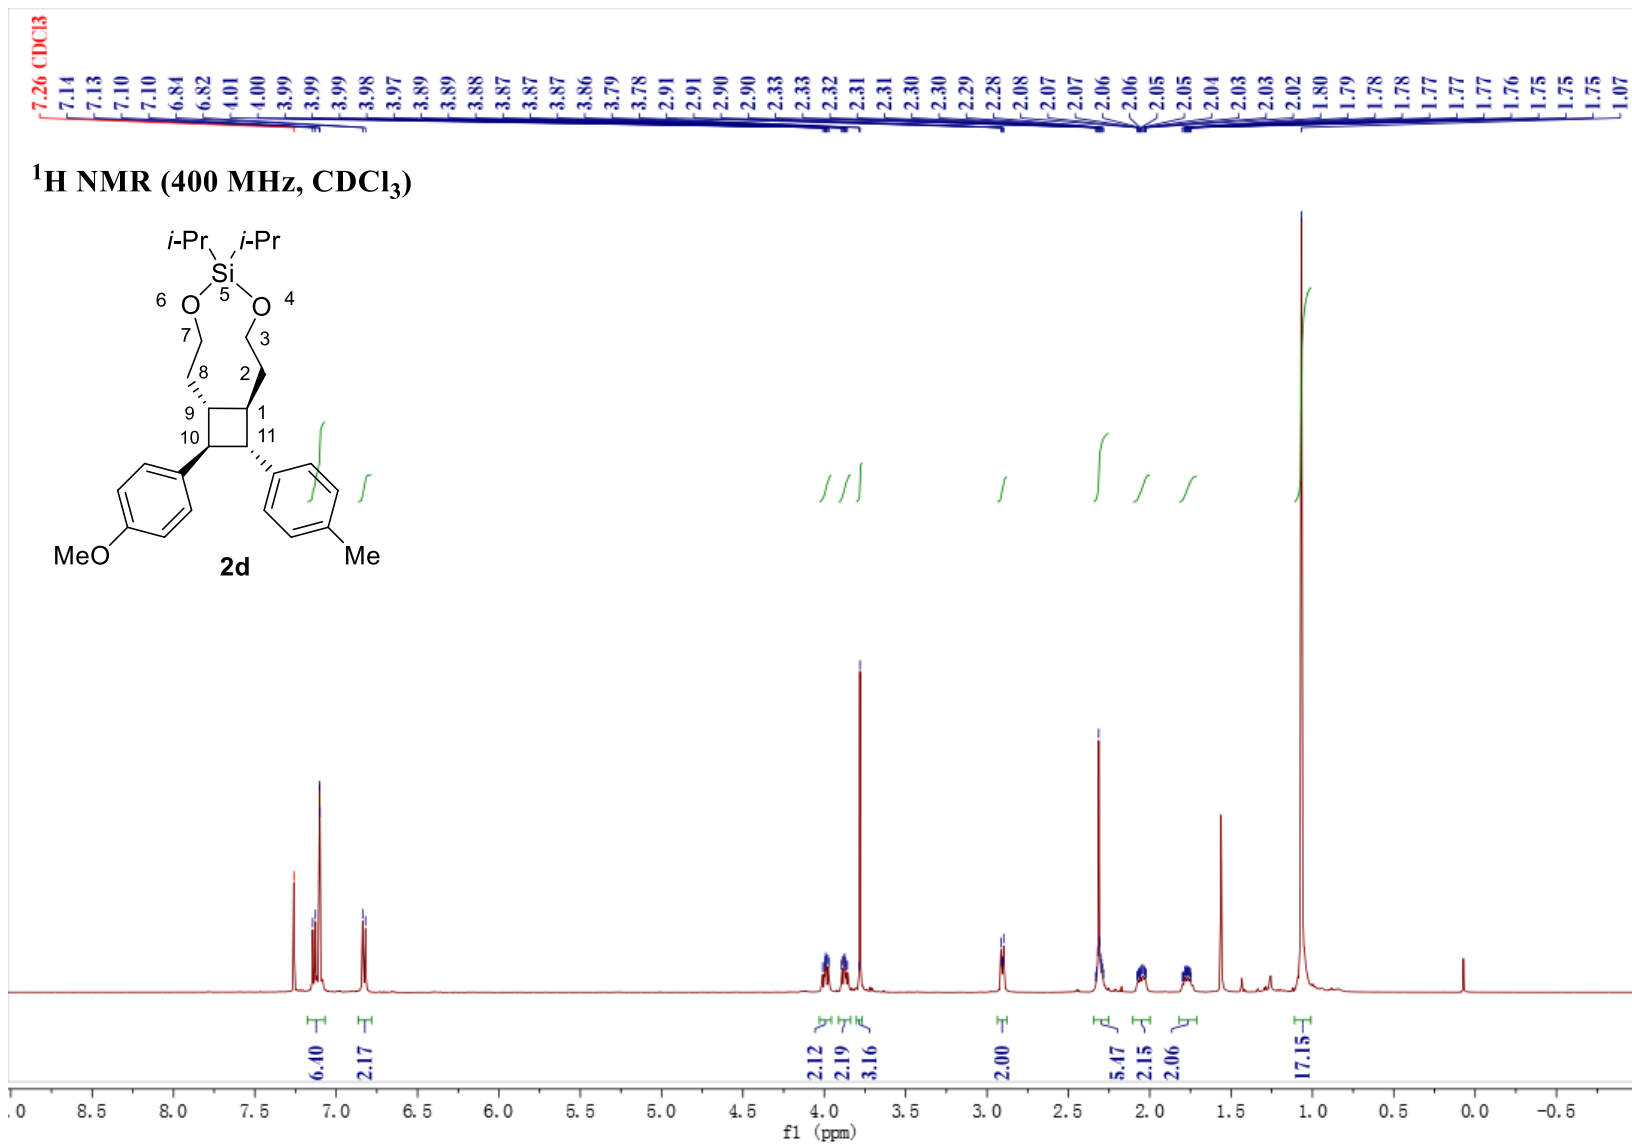

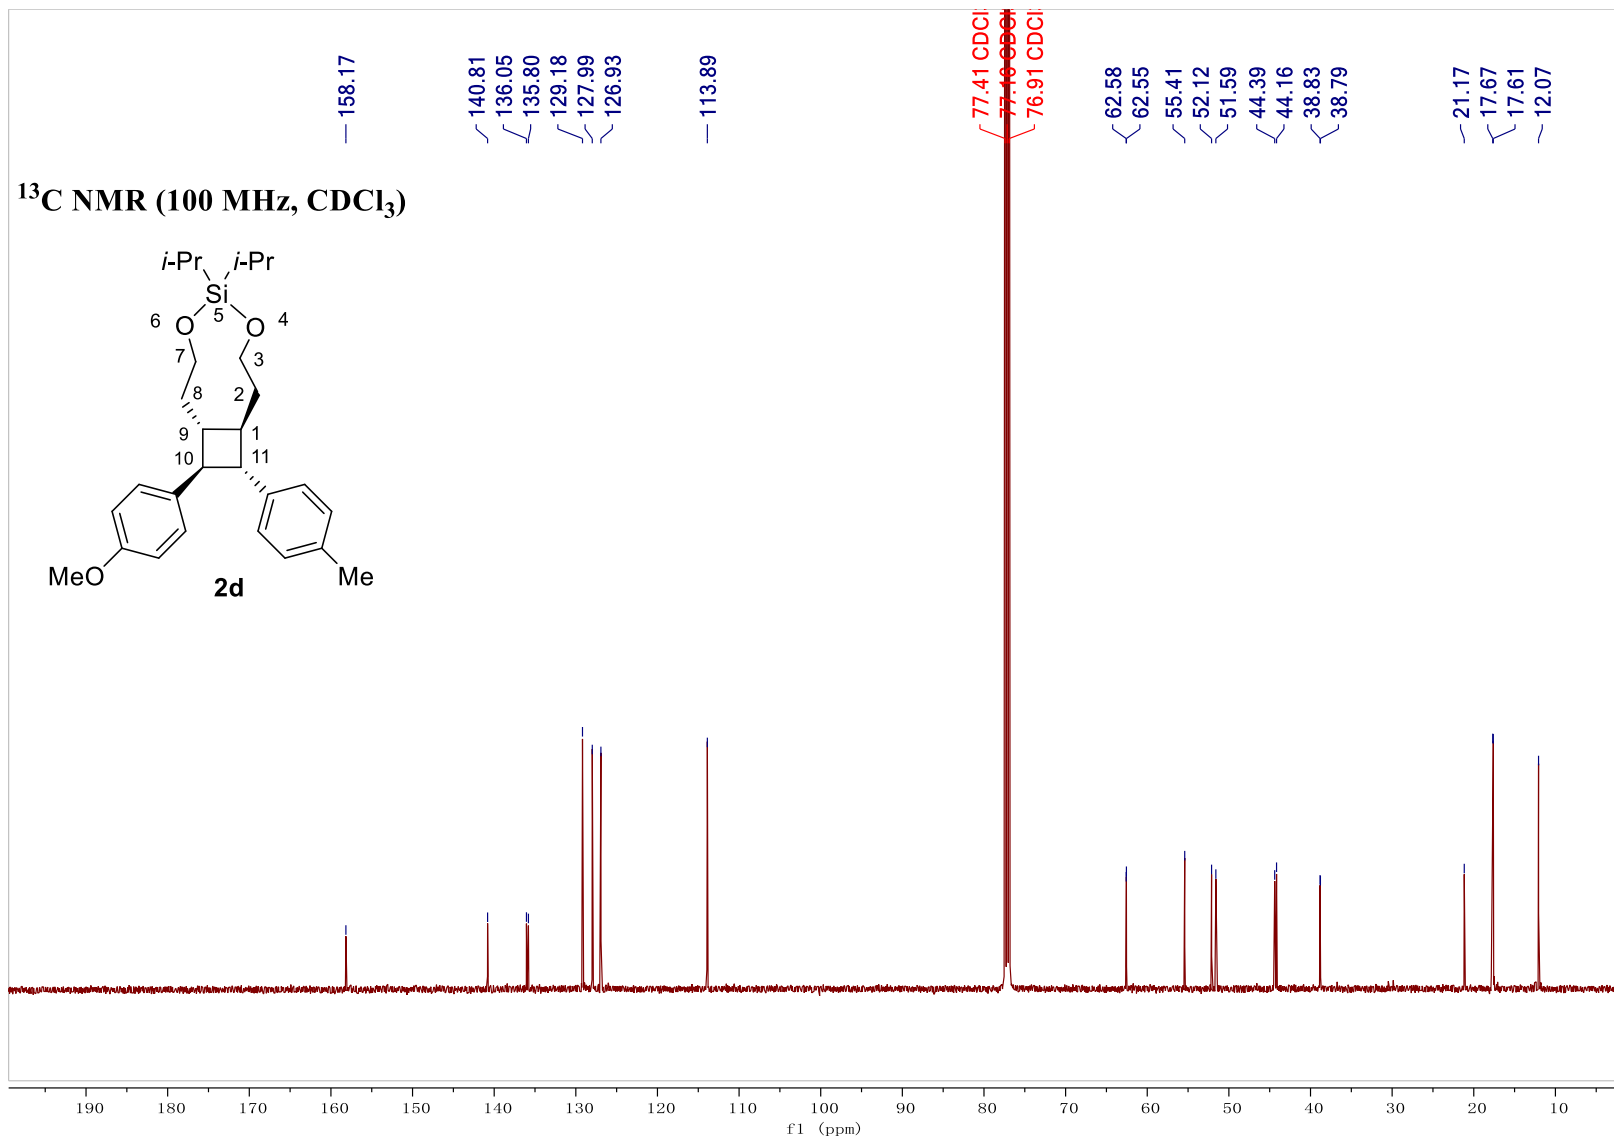

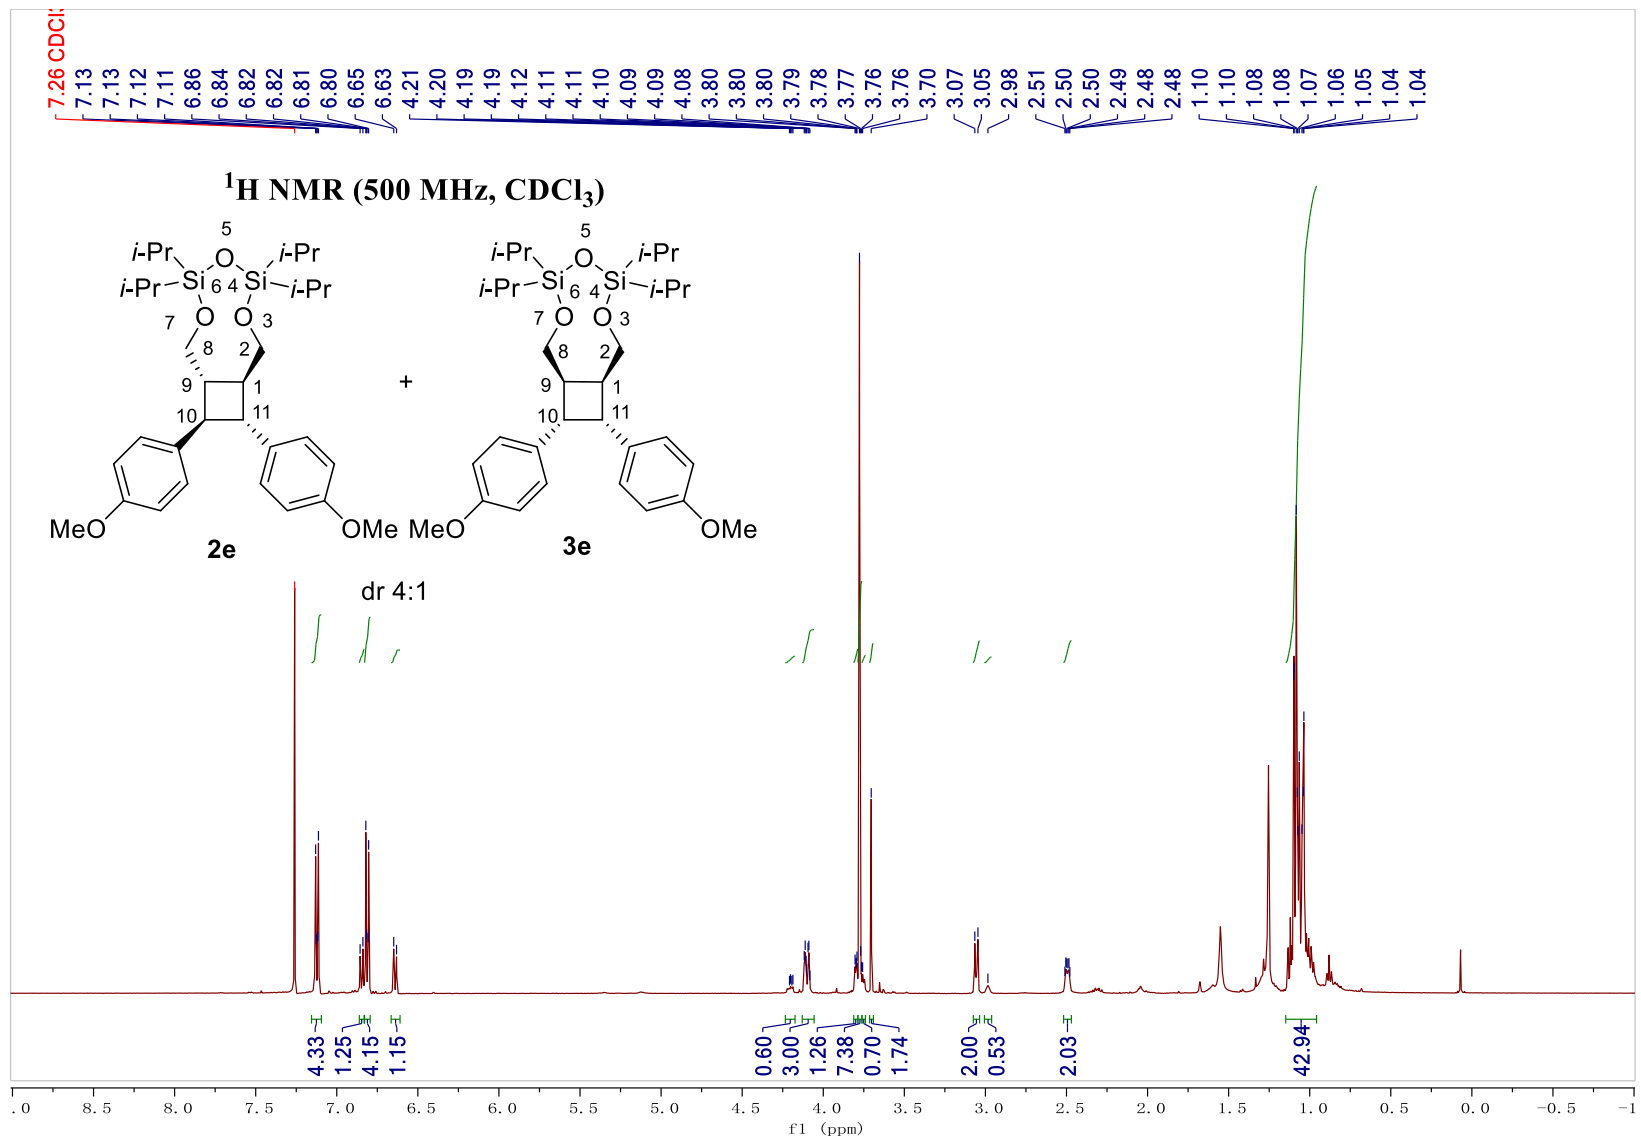

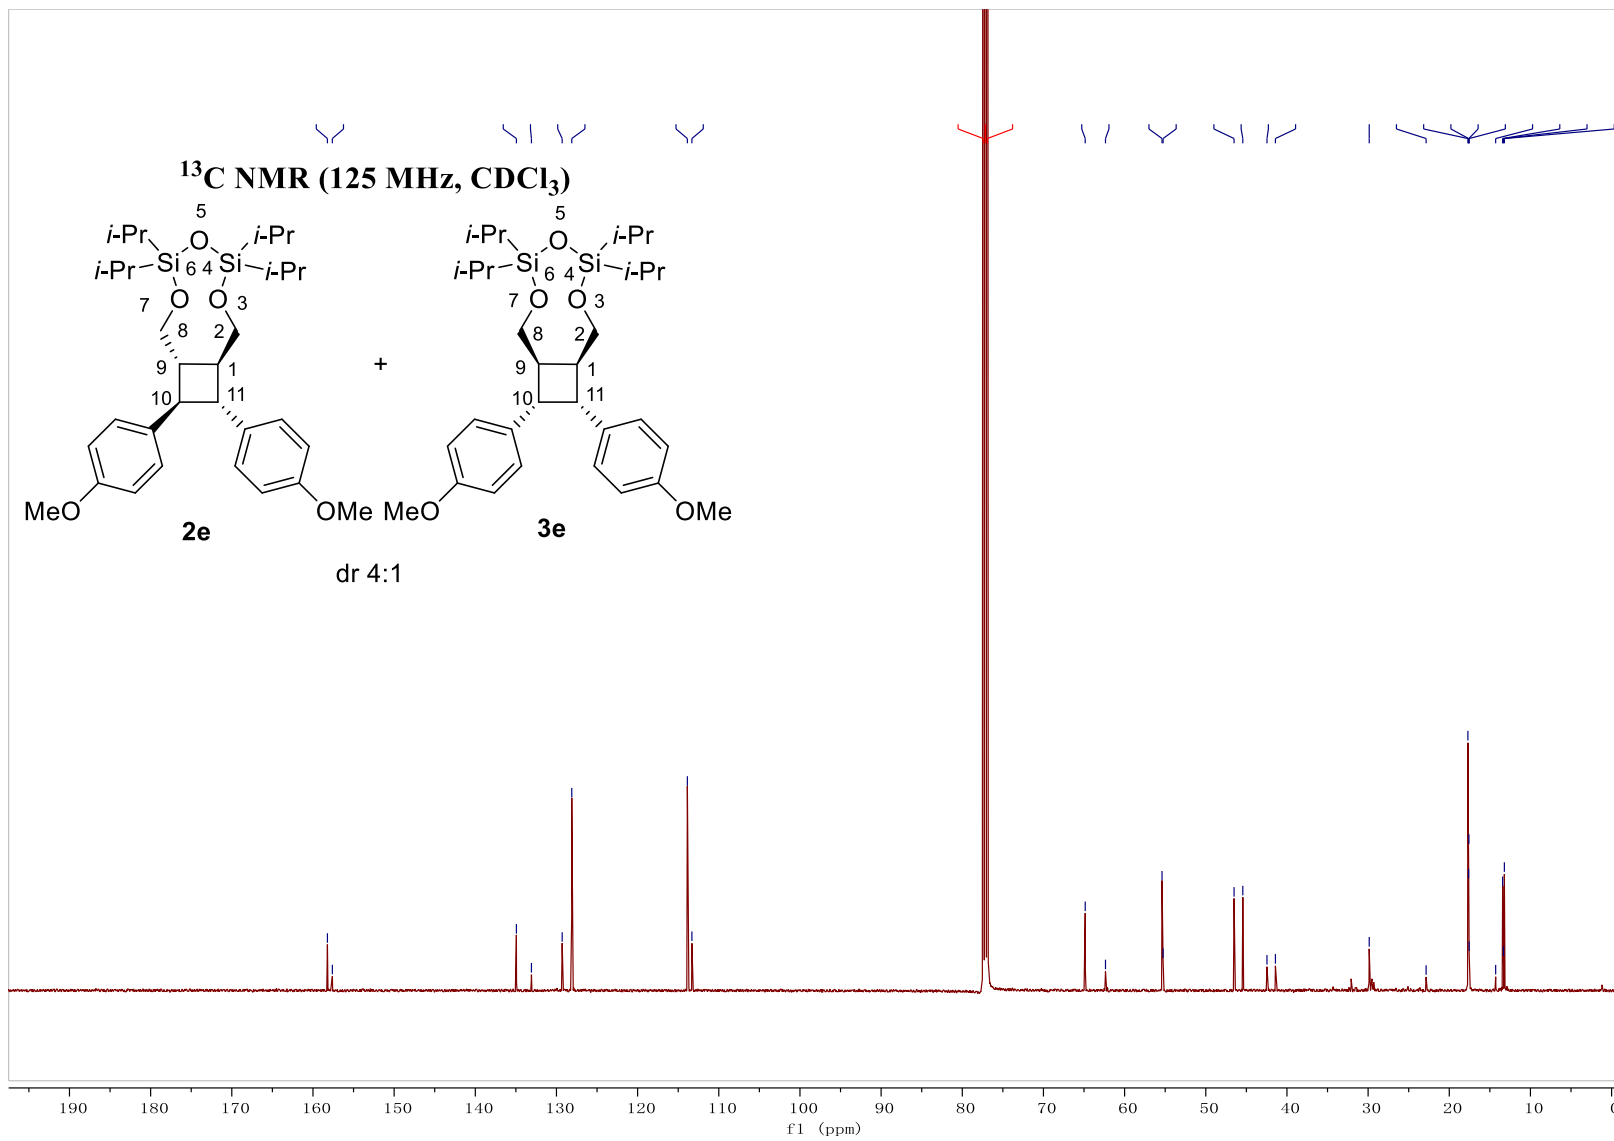

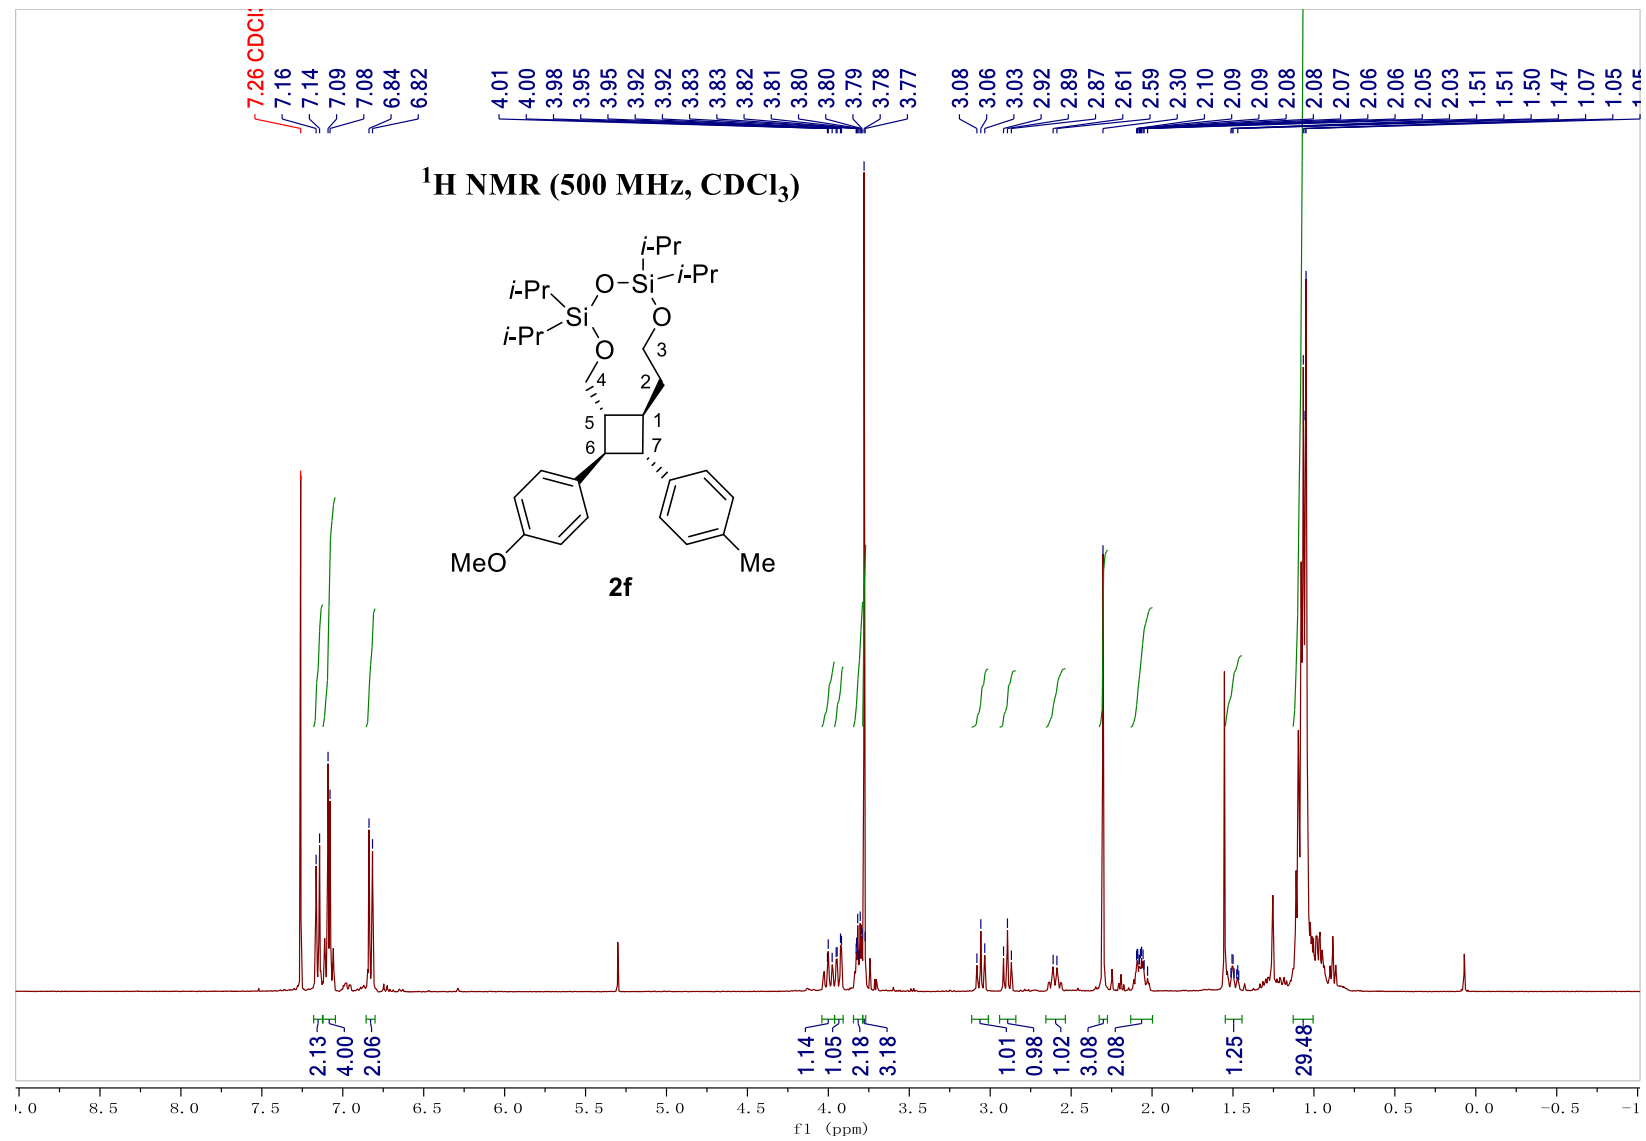



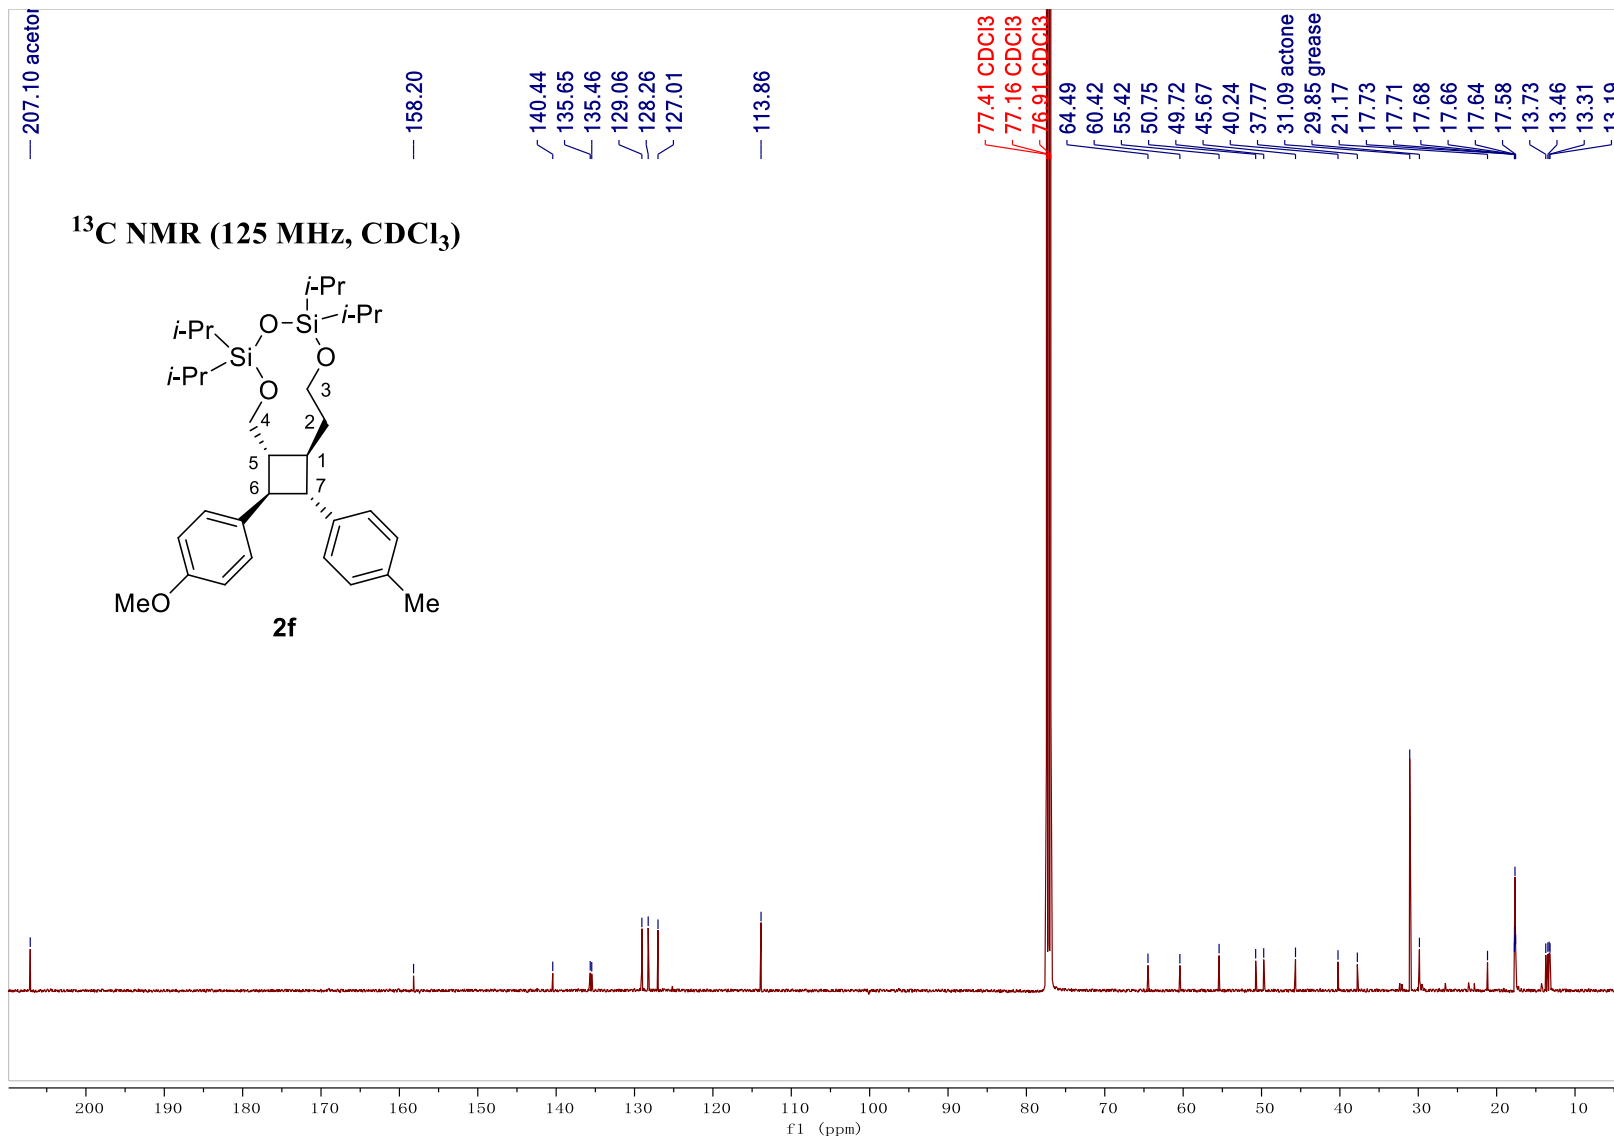

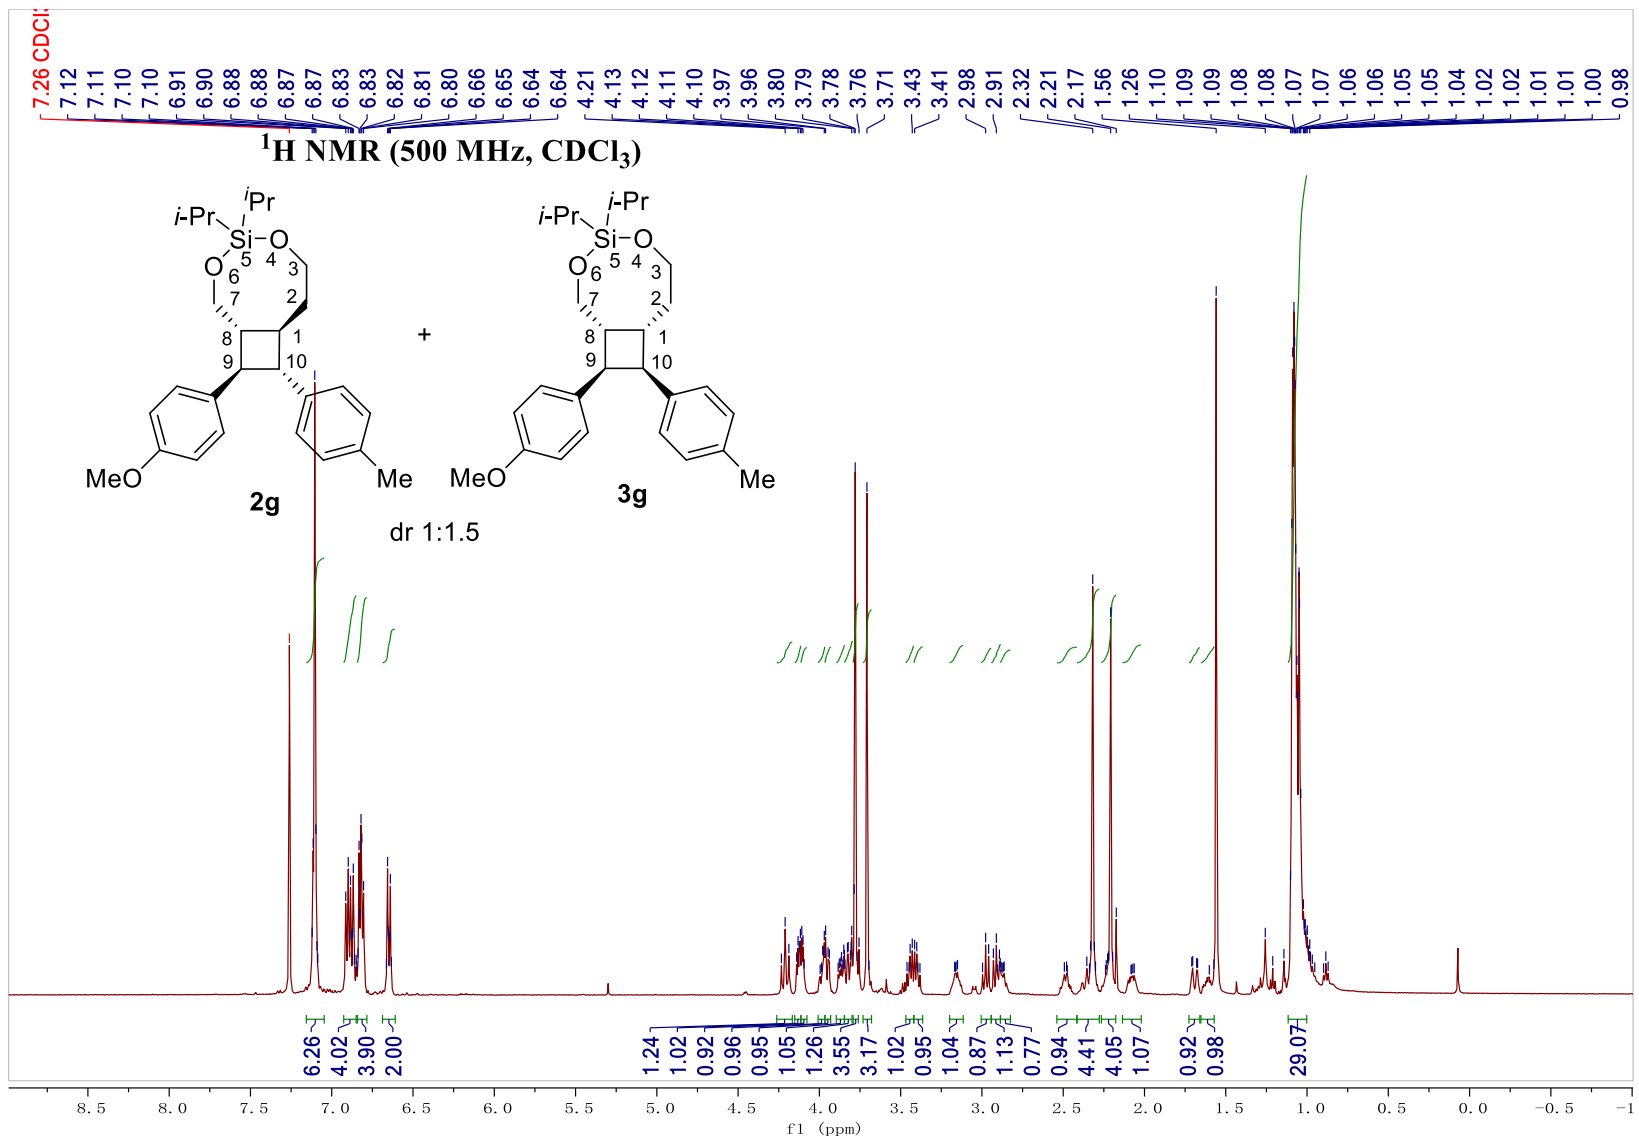

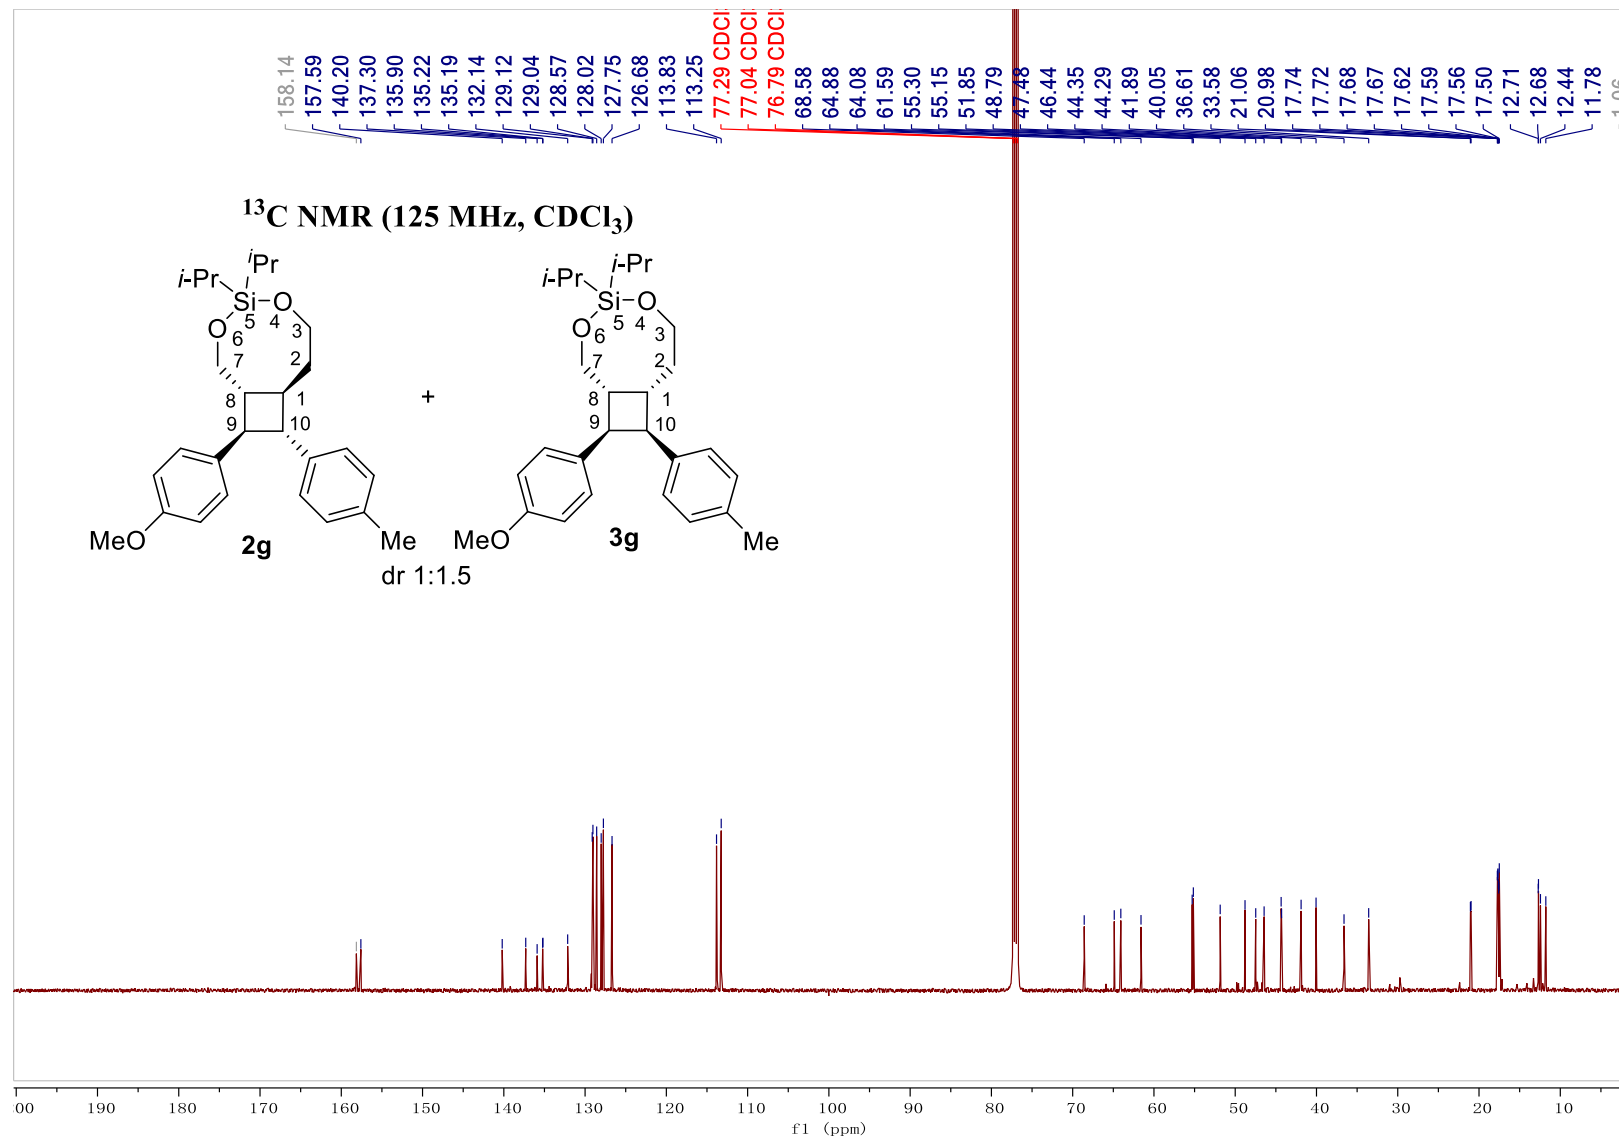

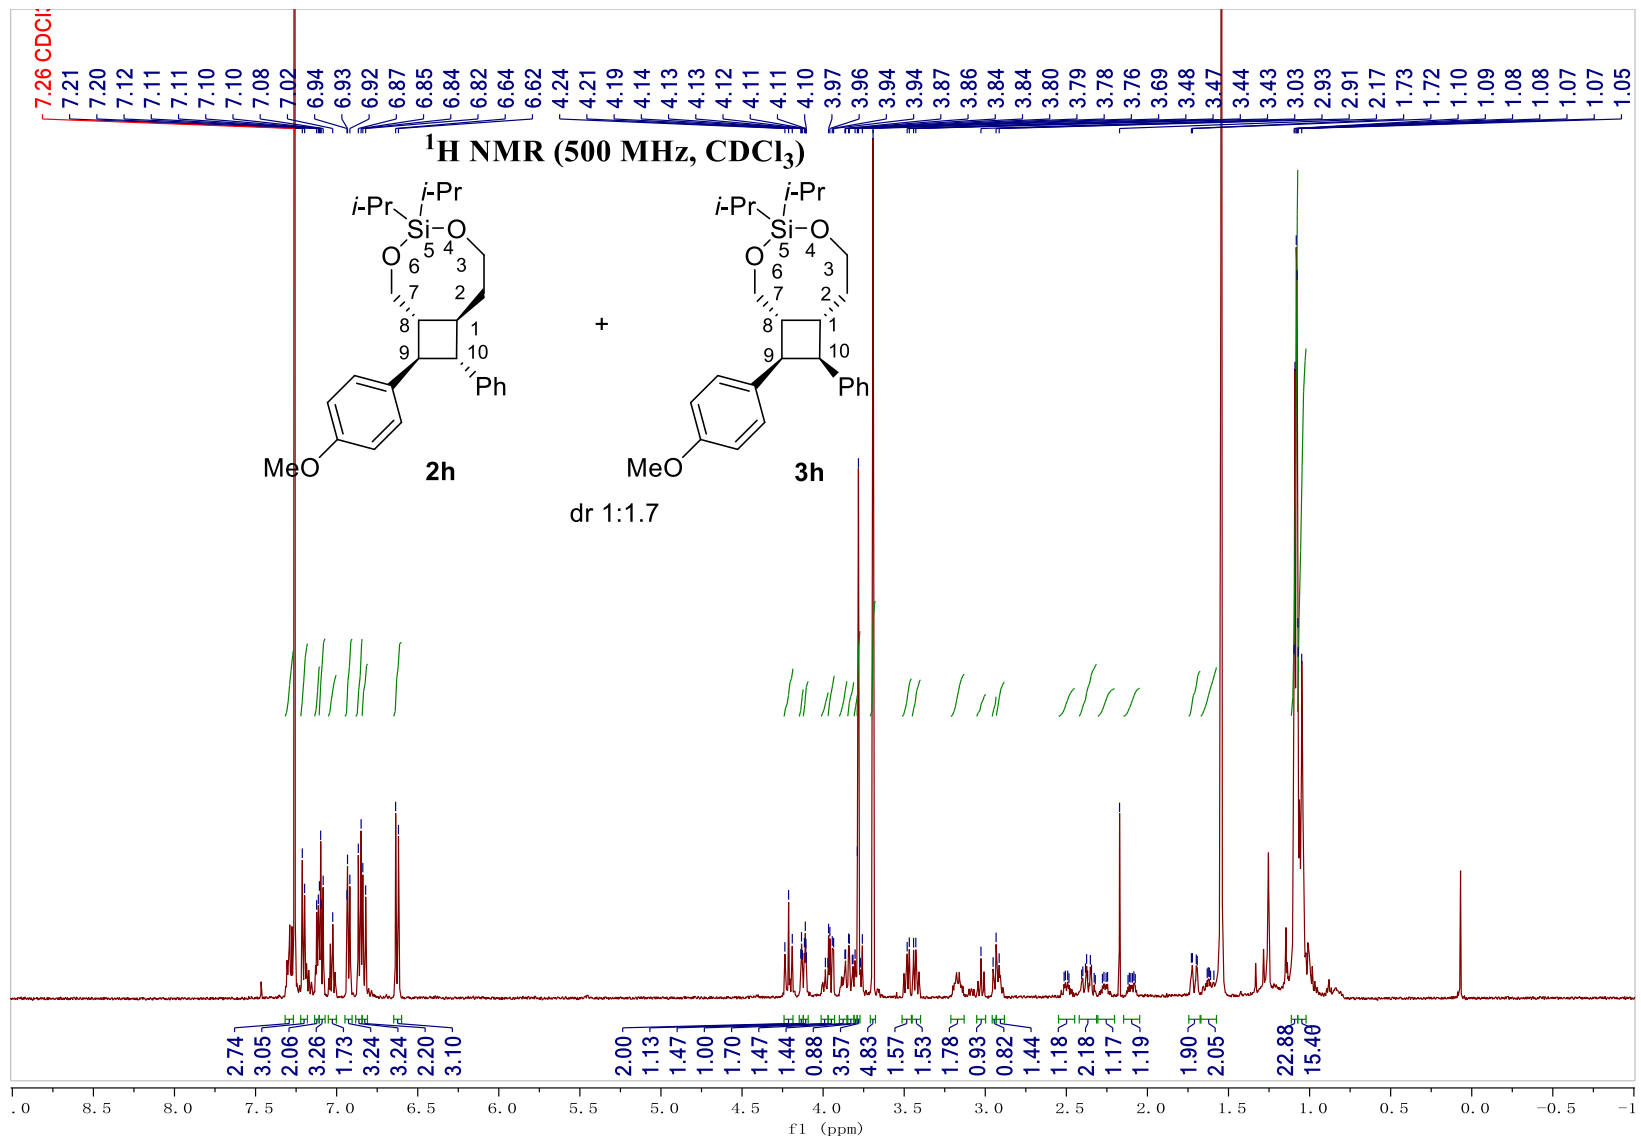

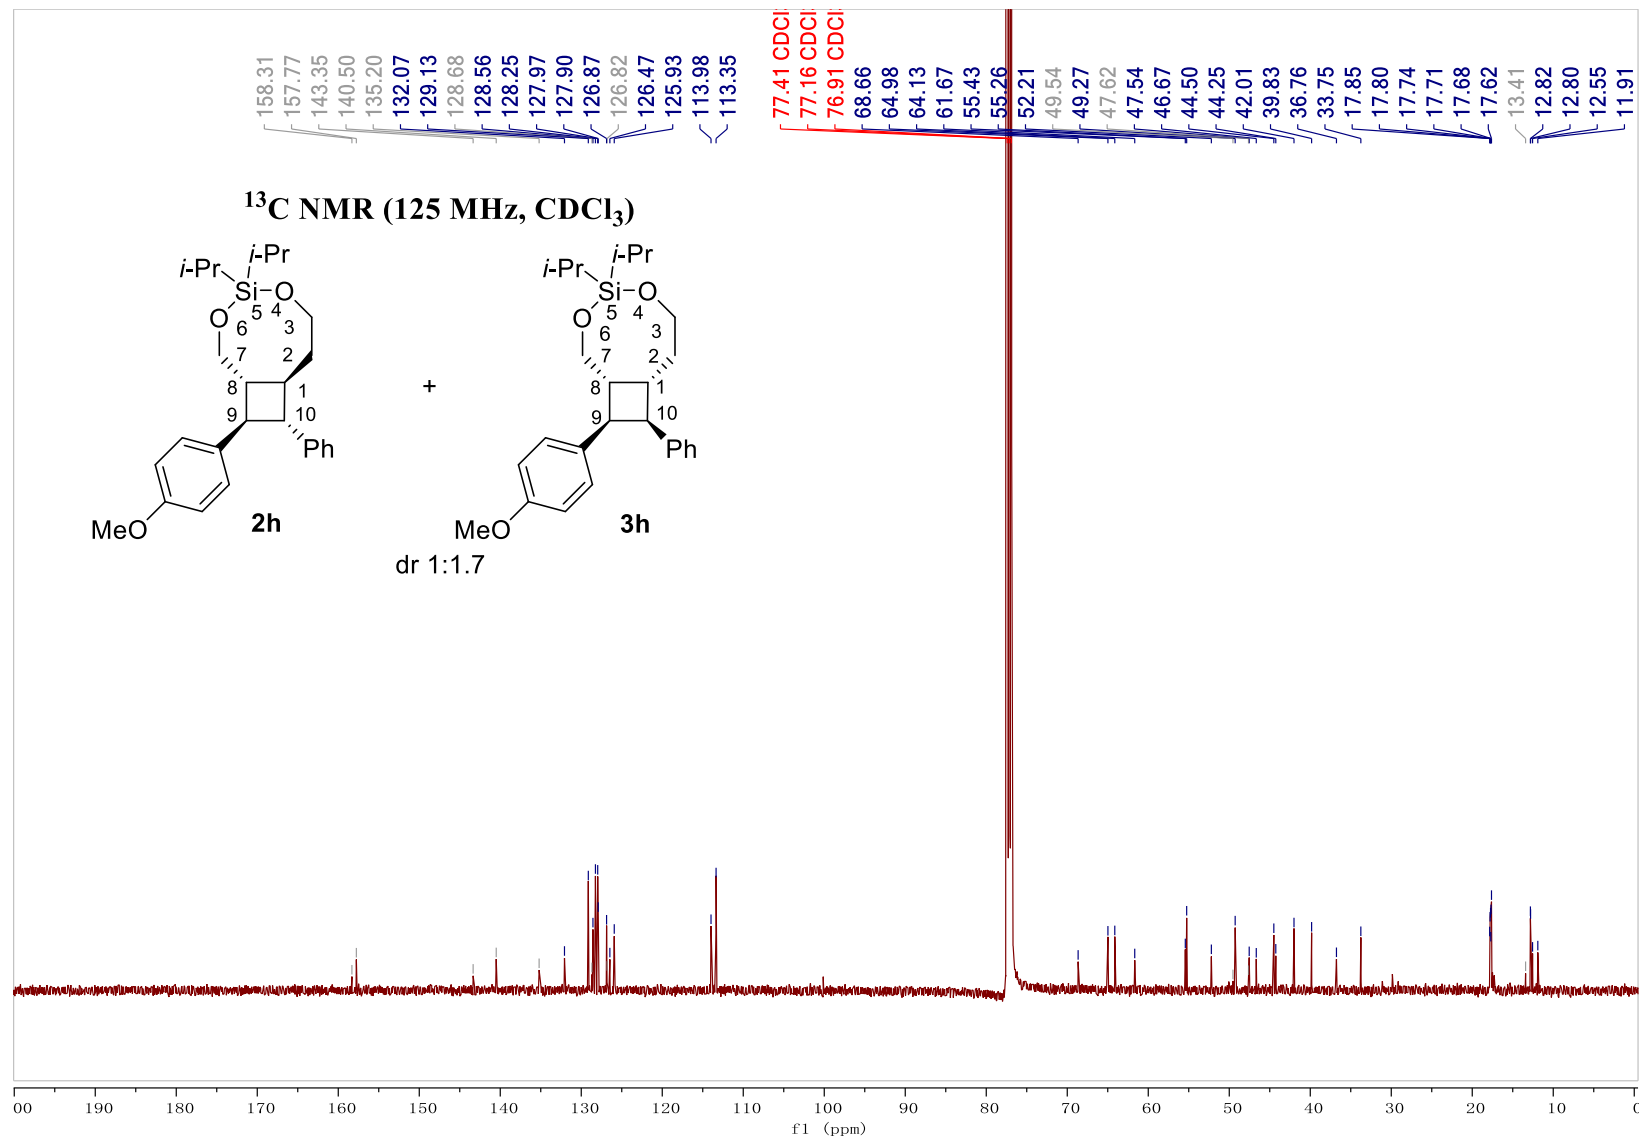

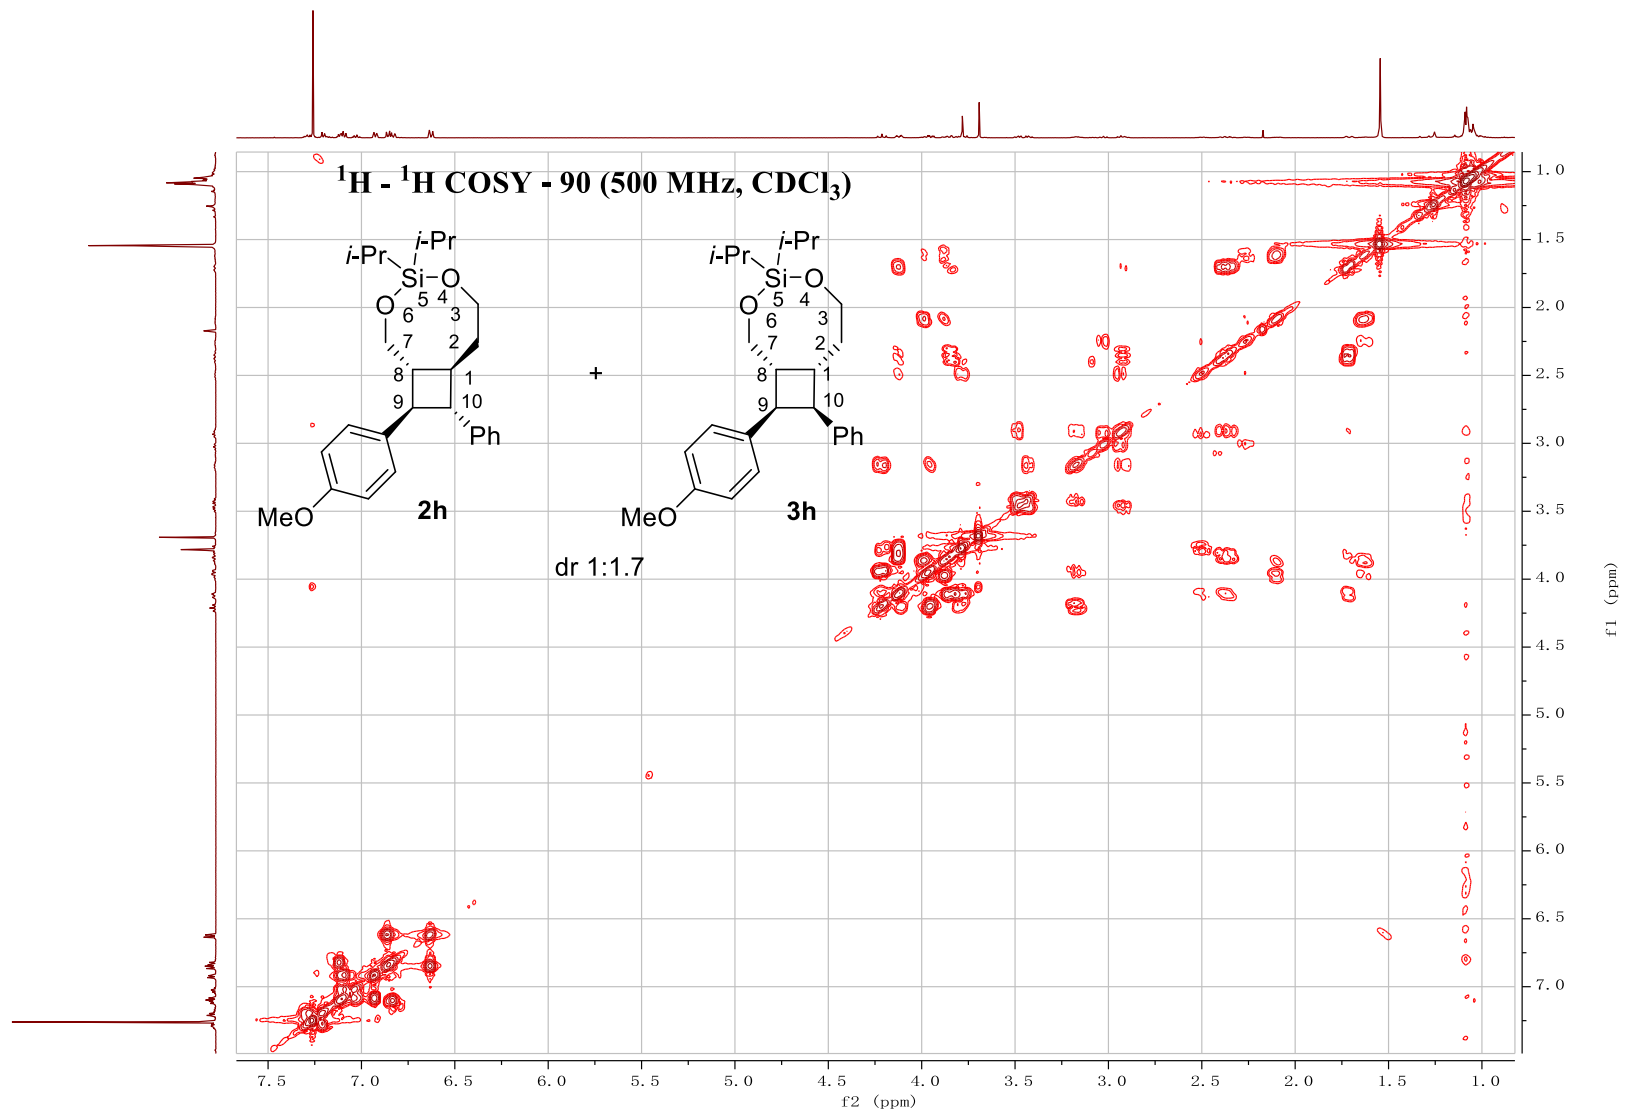

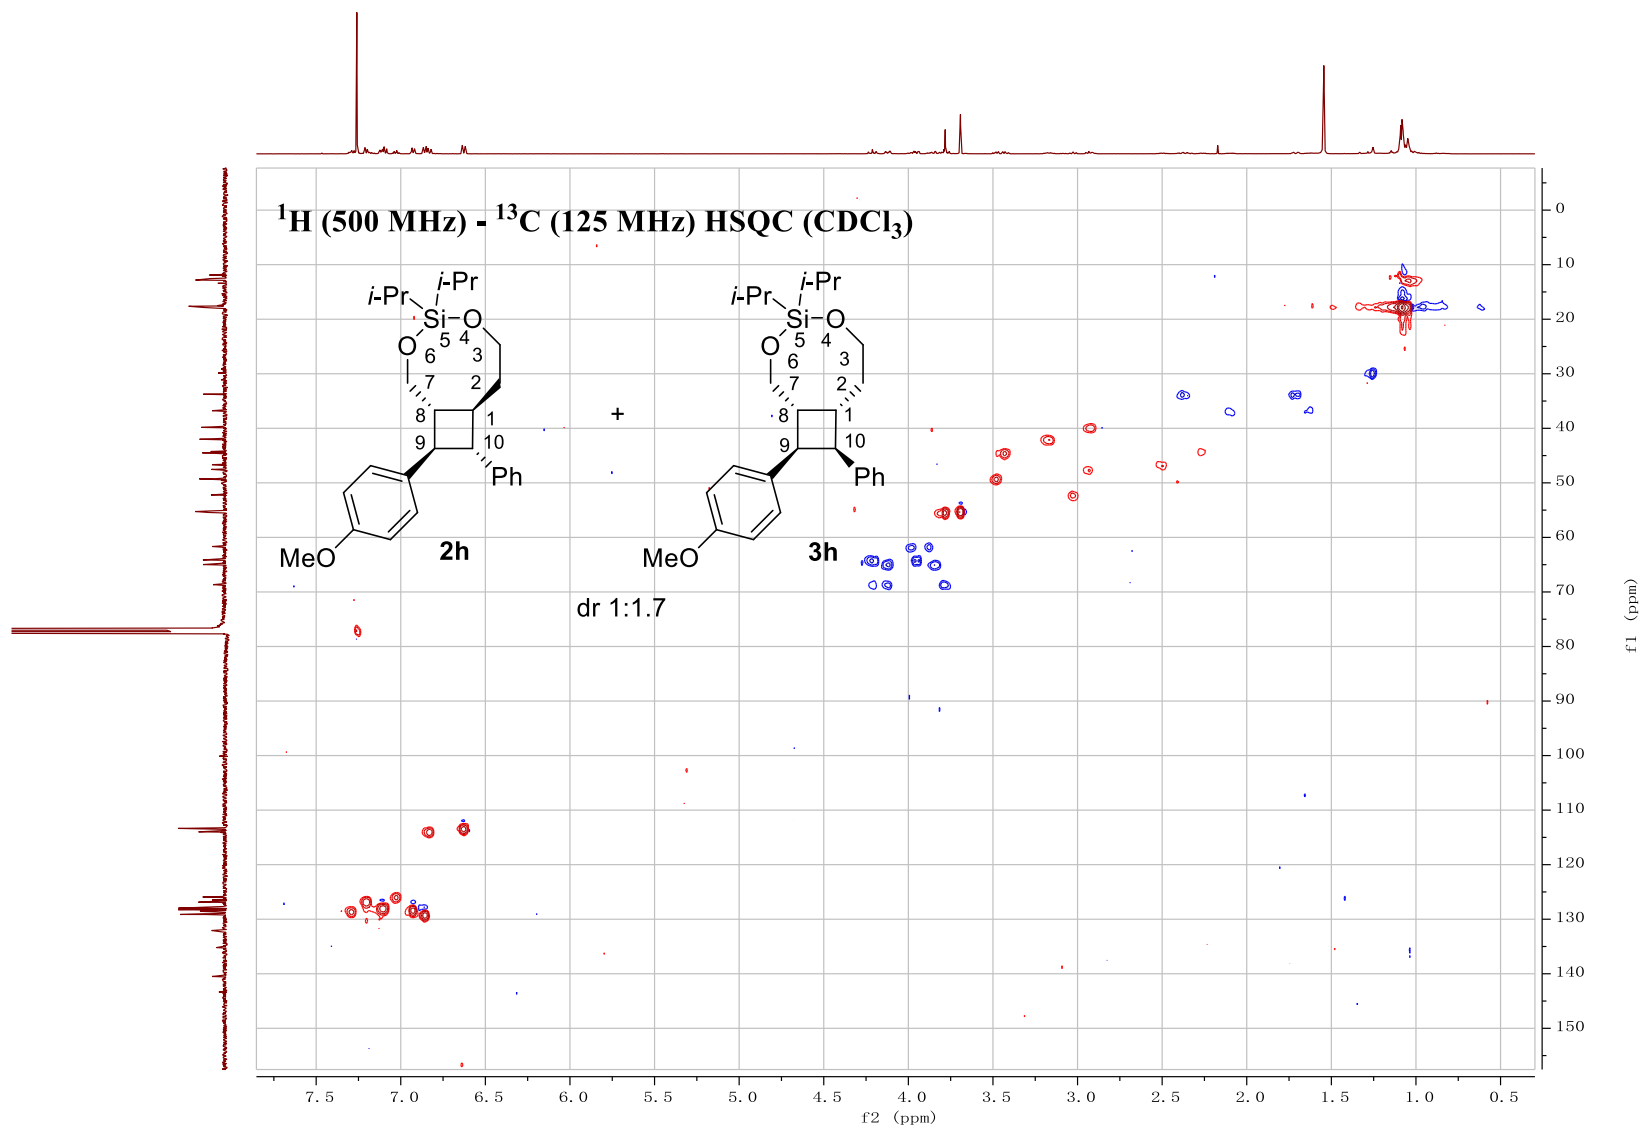

NOESY-2D (500 MHz, CDCl<sub>3</sub>)

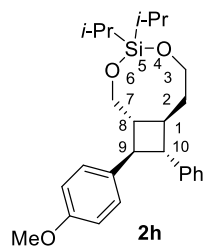

+

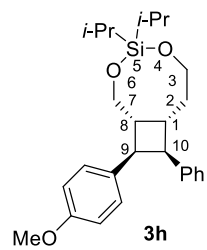

dr 1:1.7

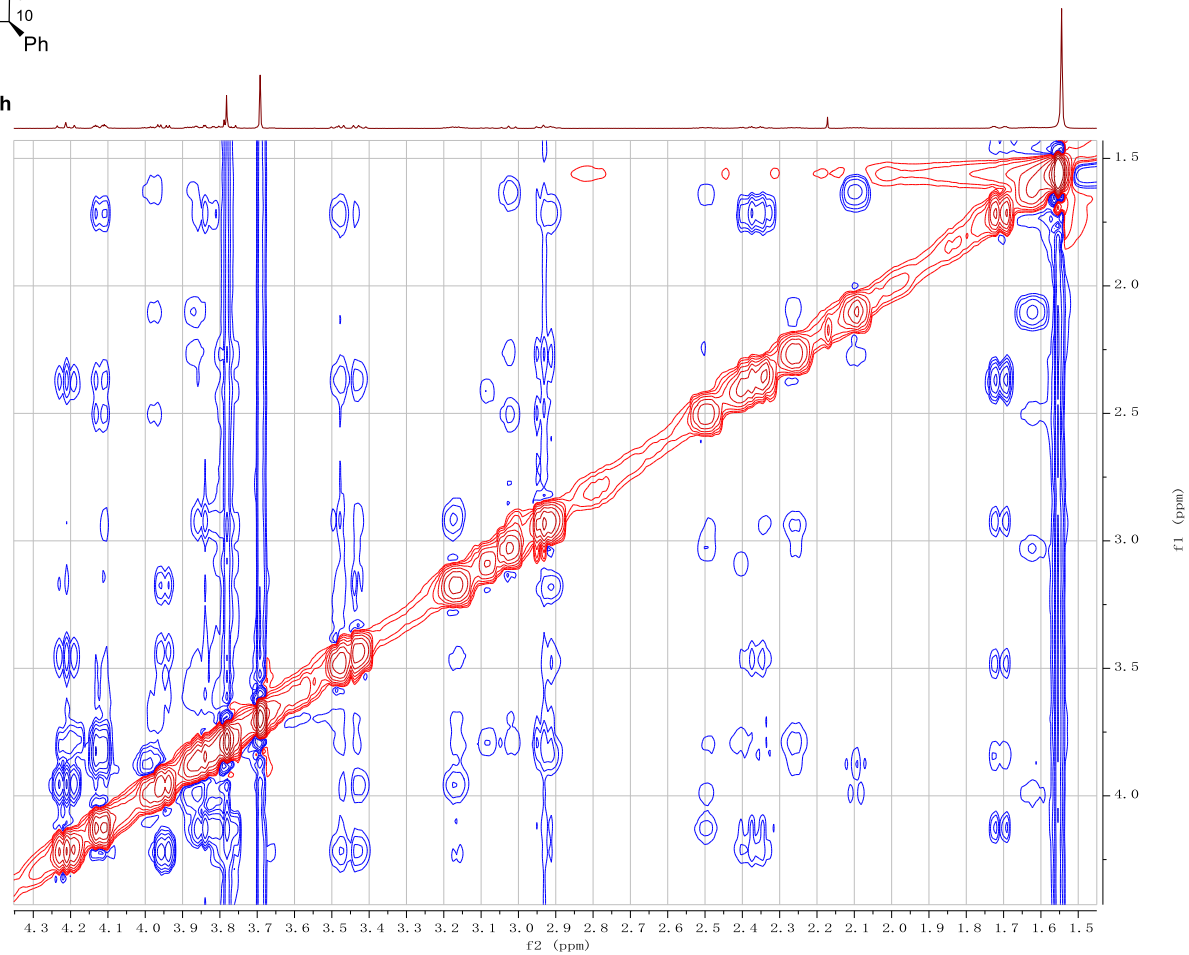



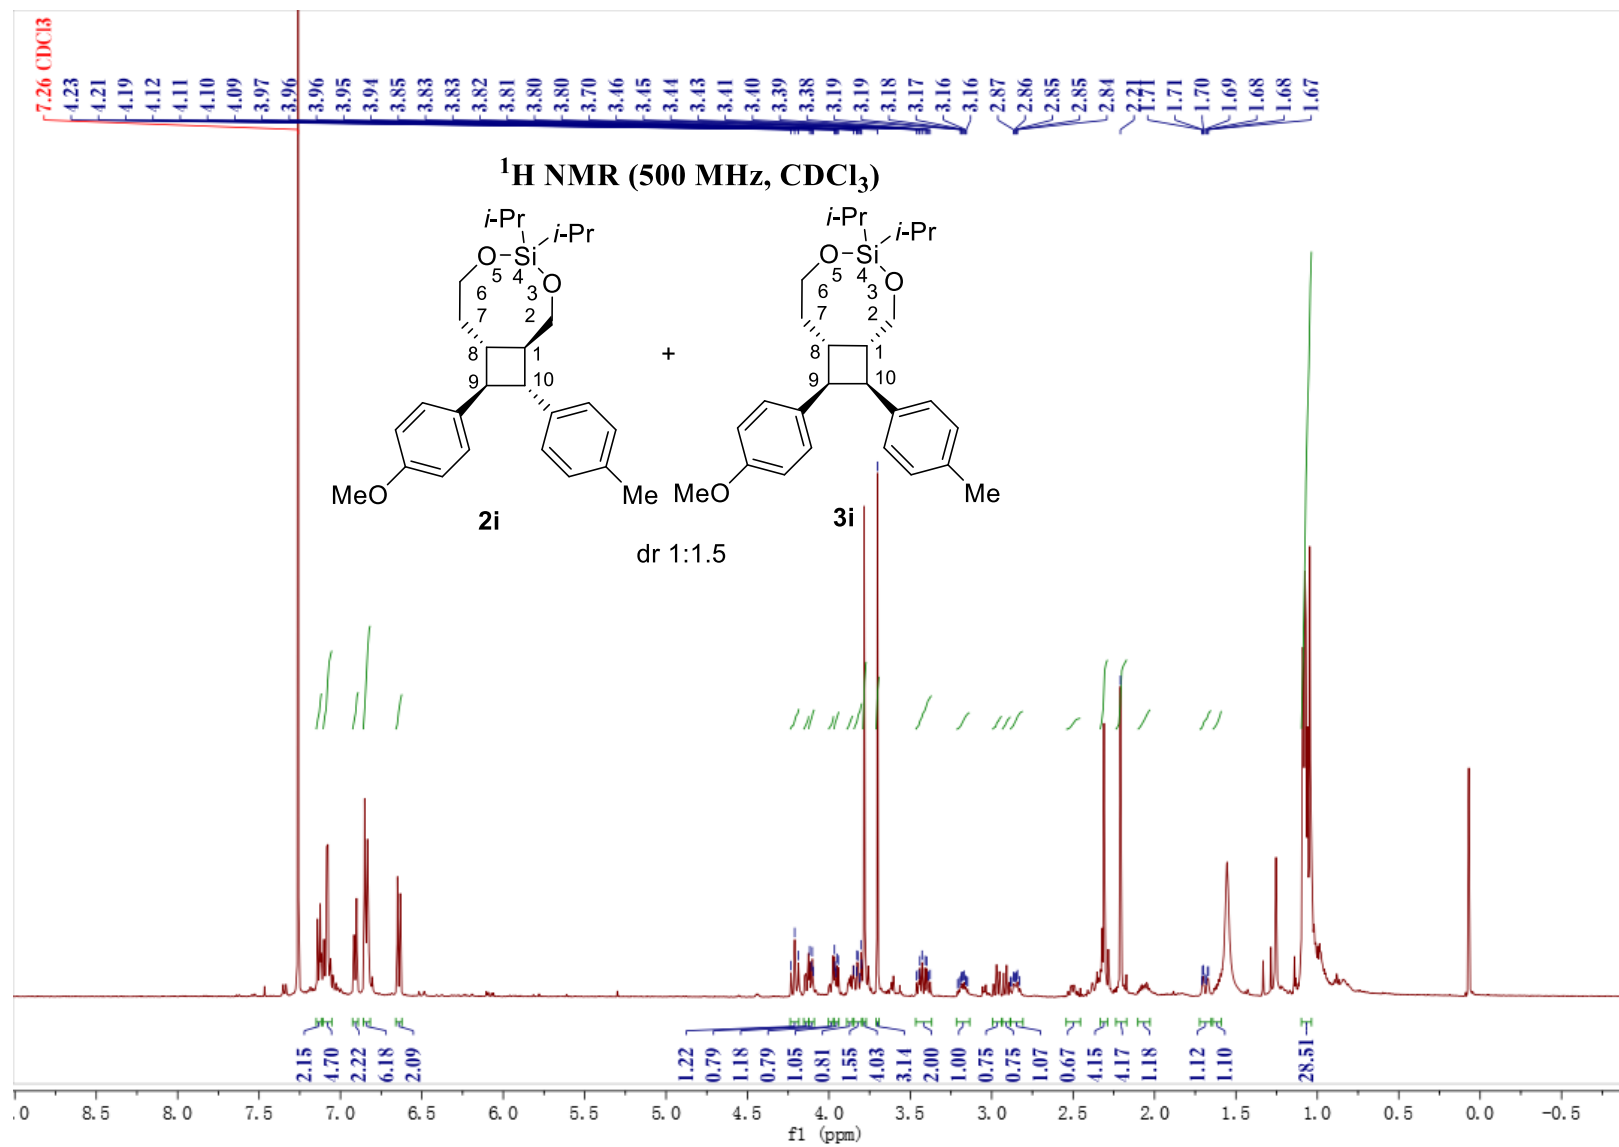

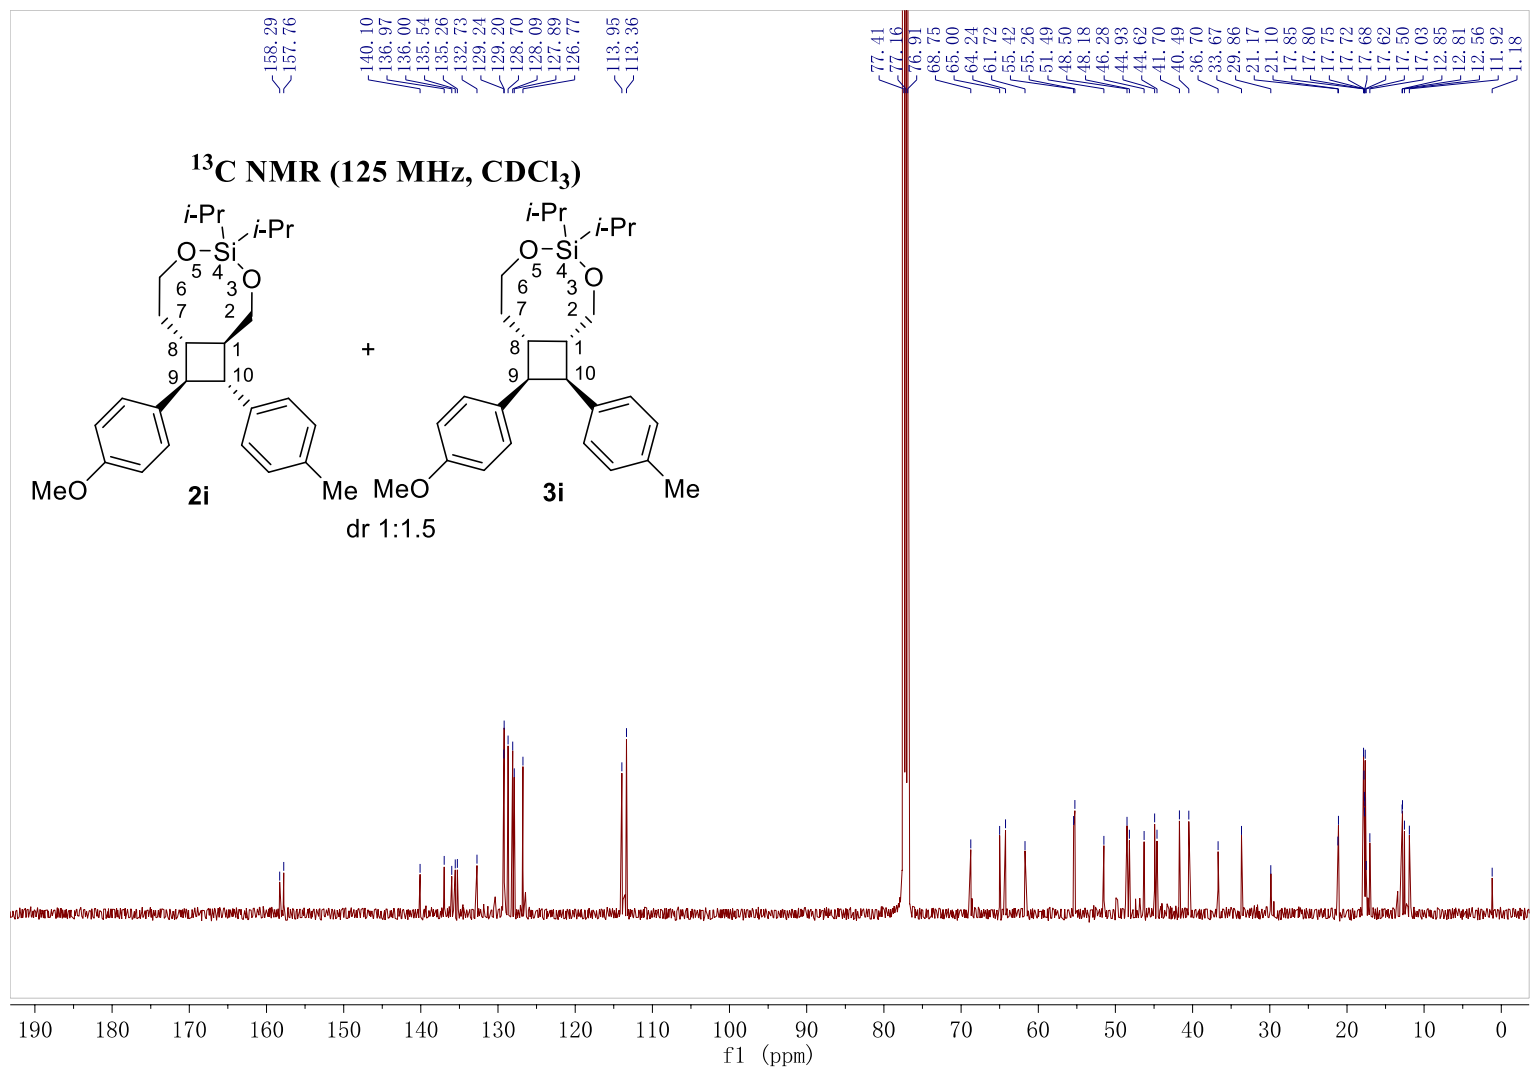

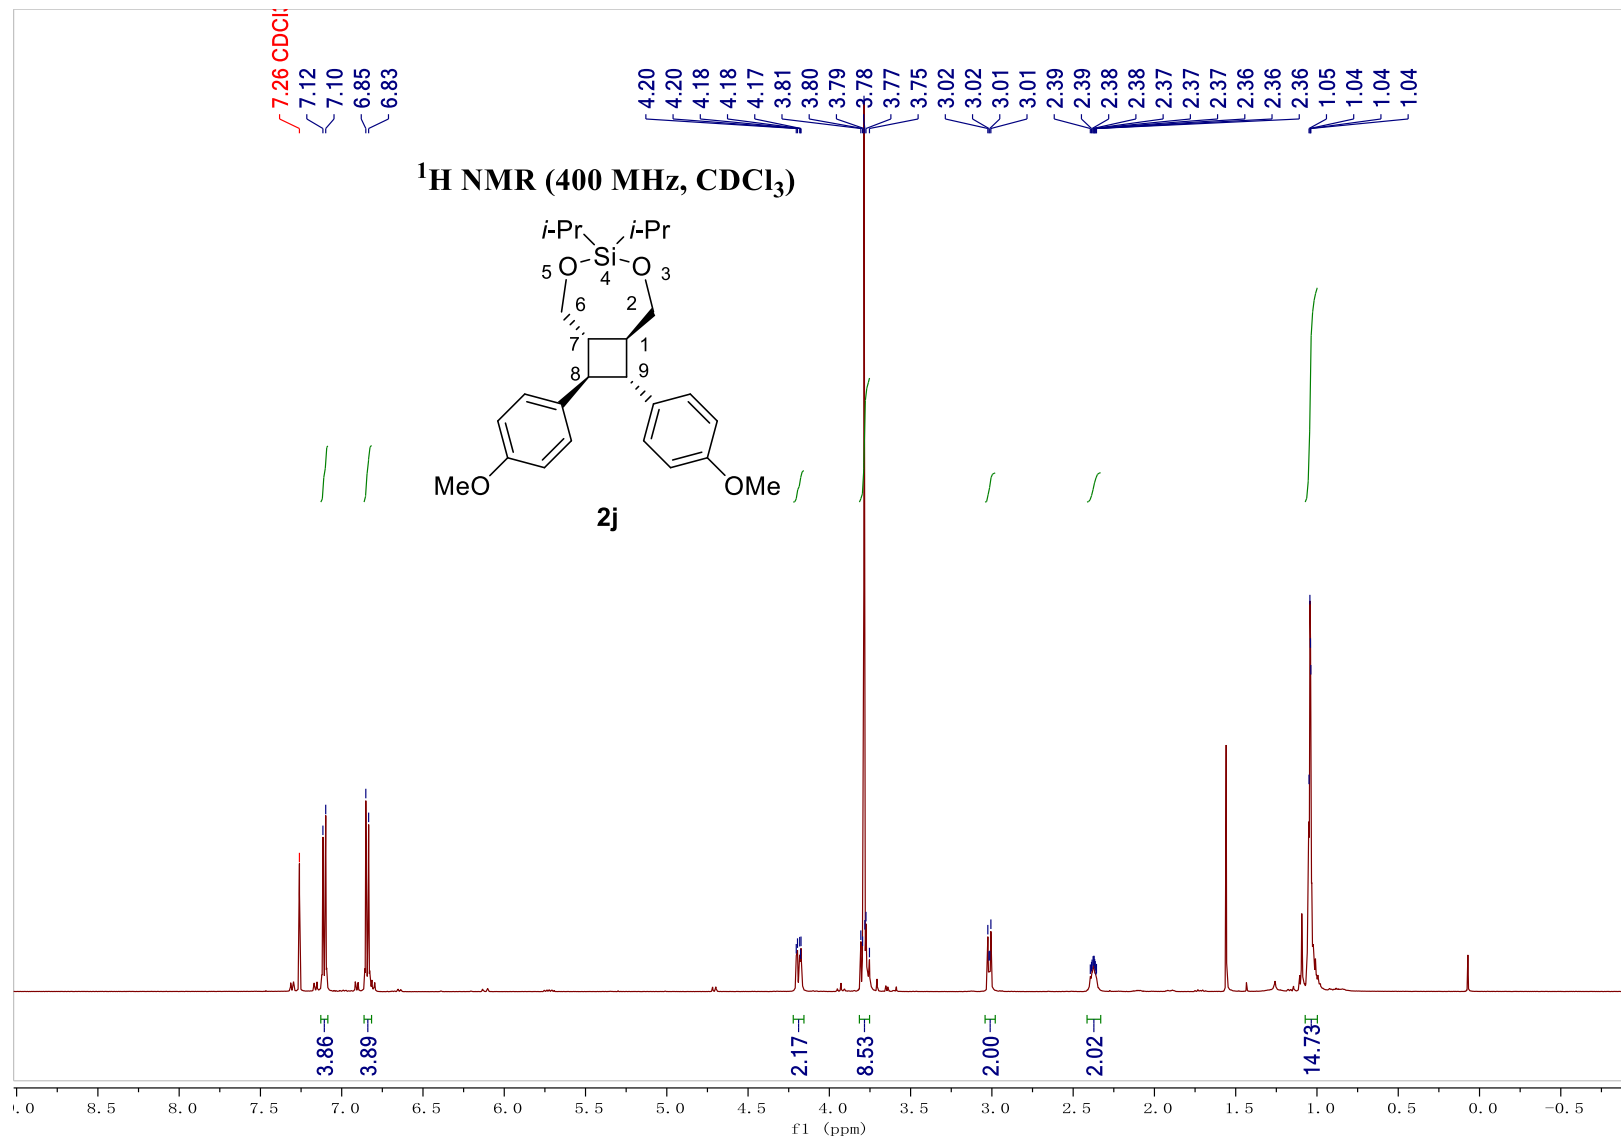

**<sup>13</sup>C NMR (100 MHz, CDCl<sub>3</sub>)**

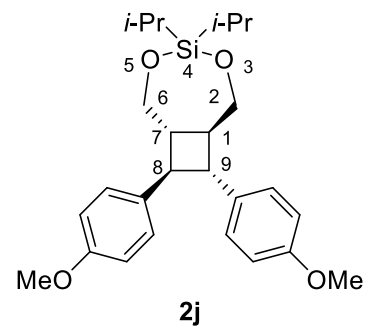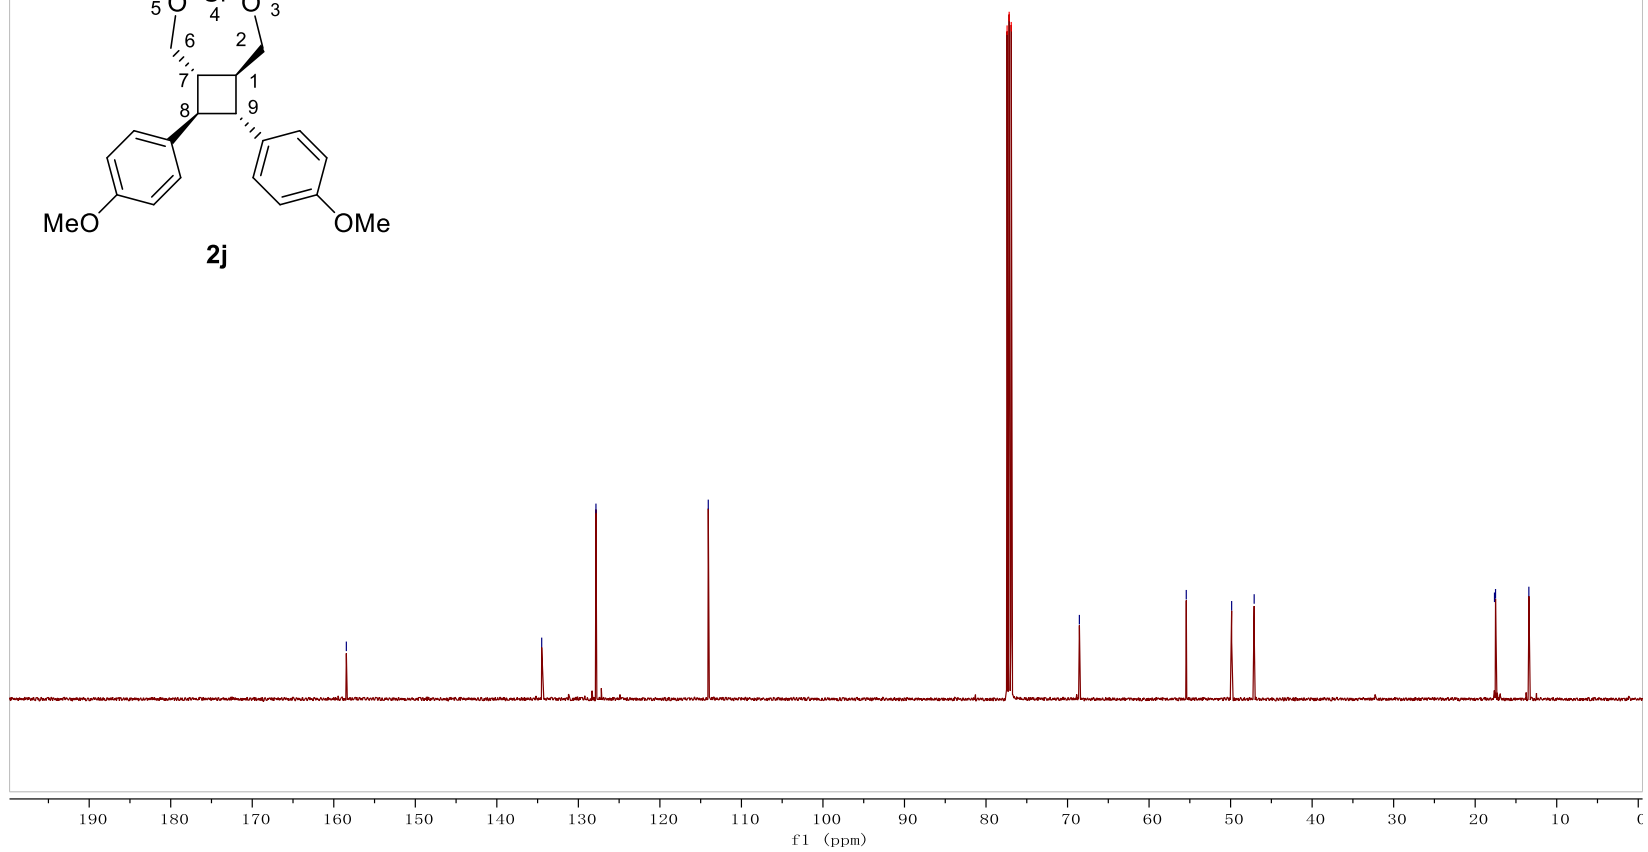

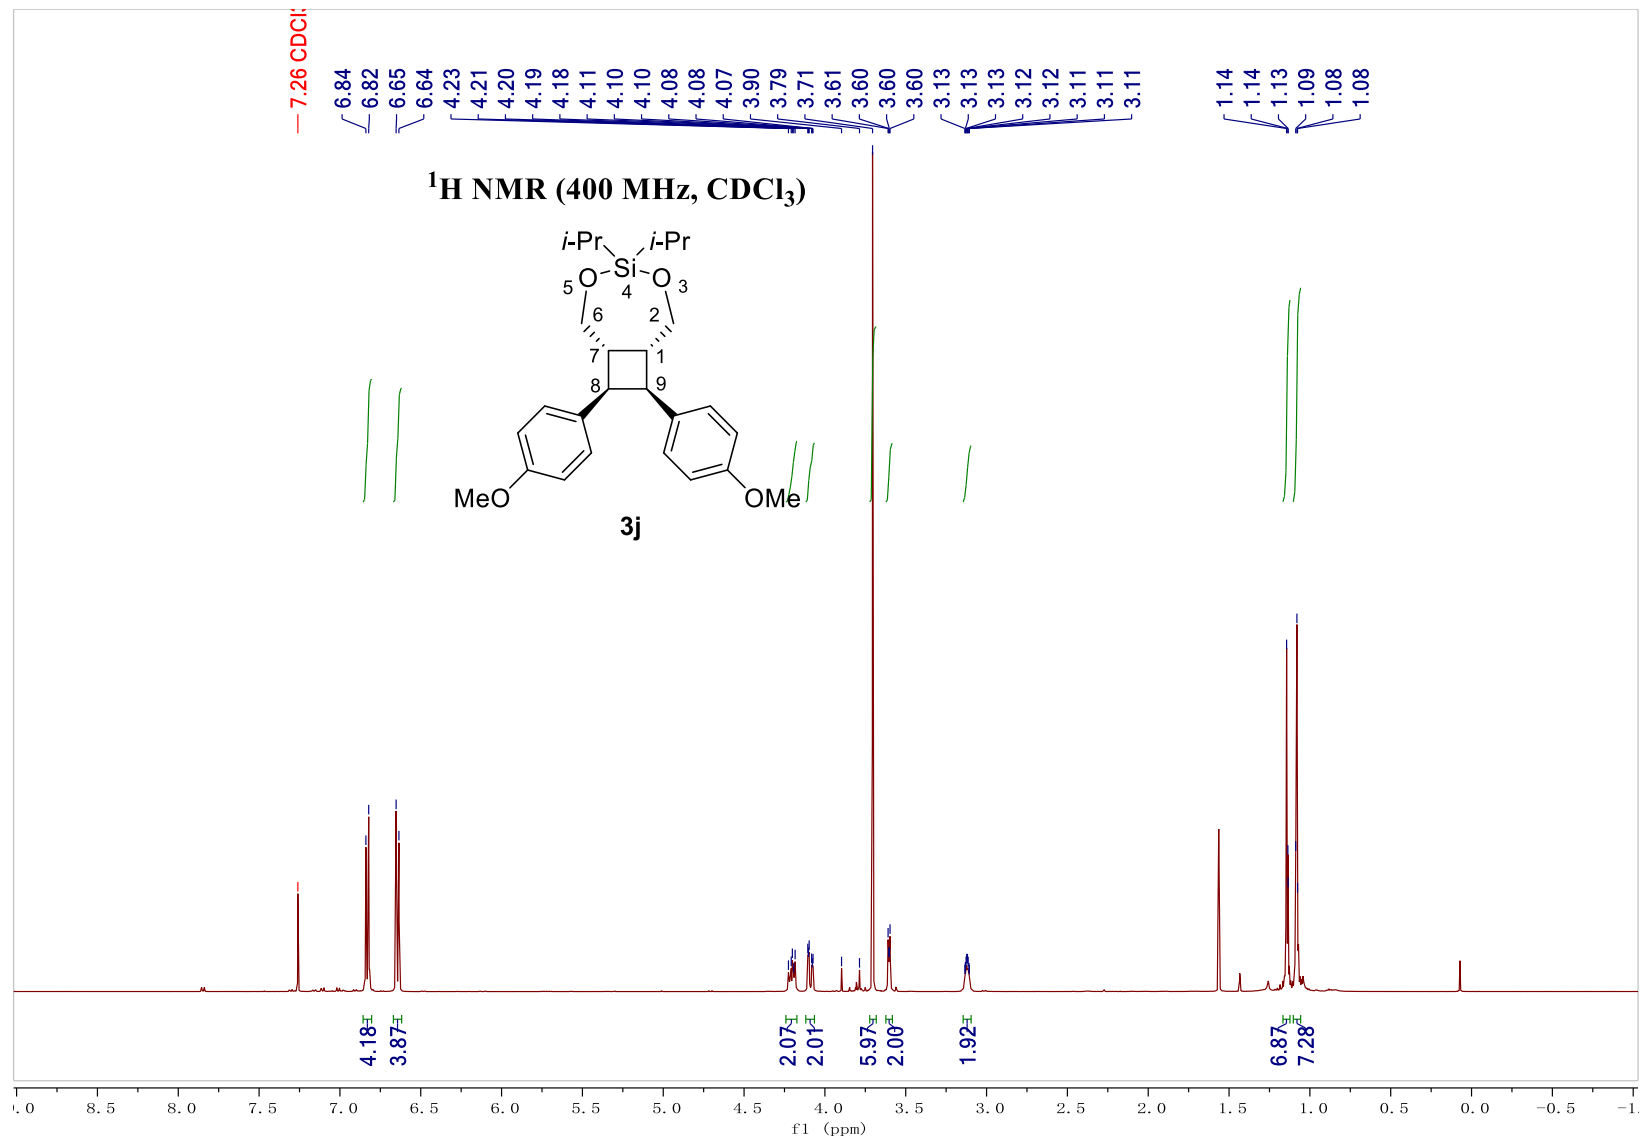

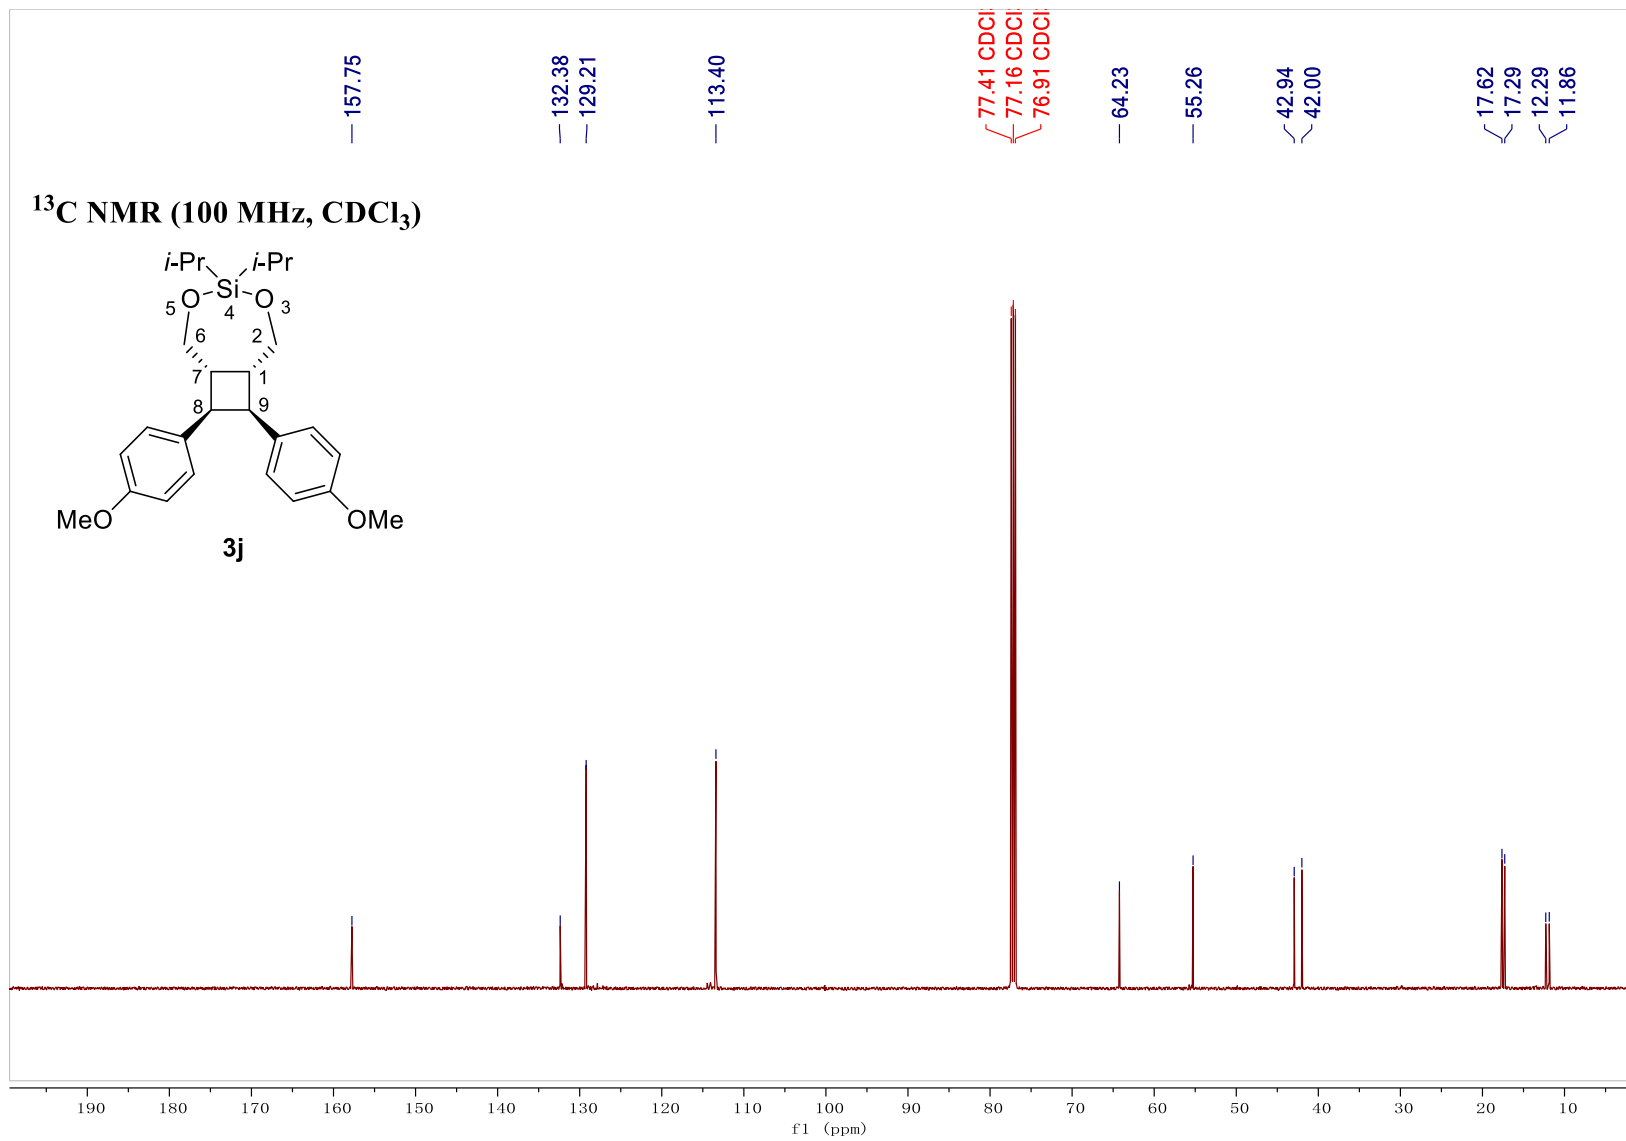

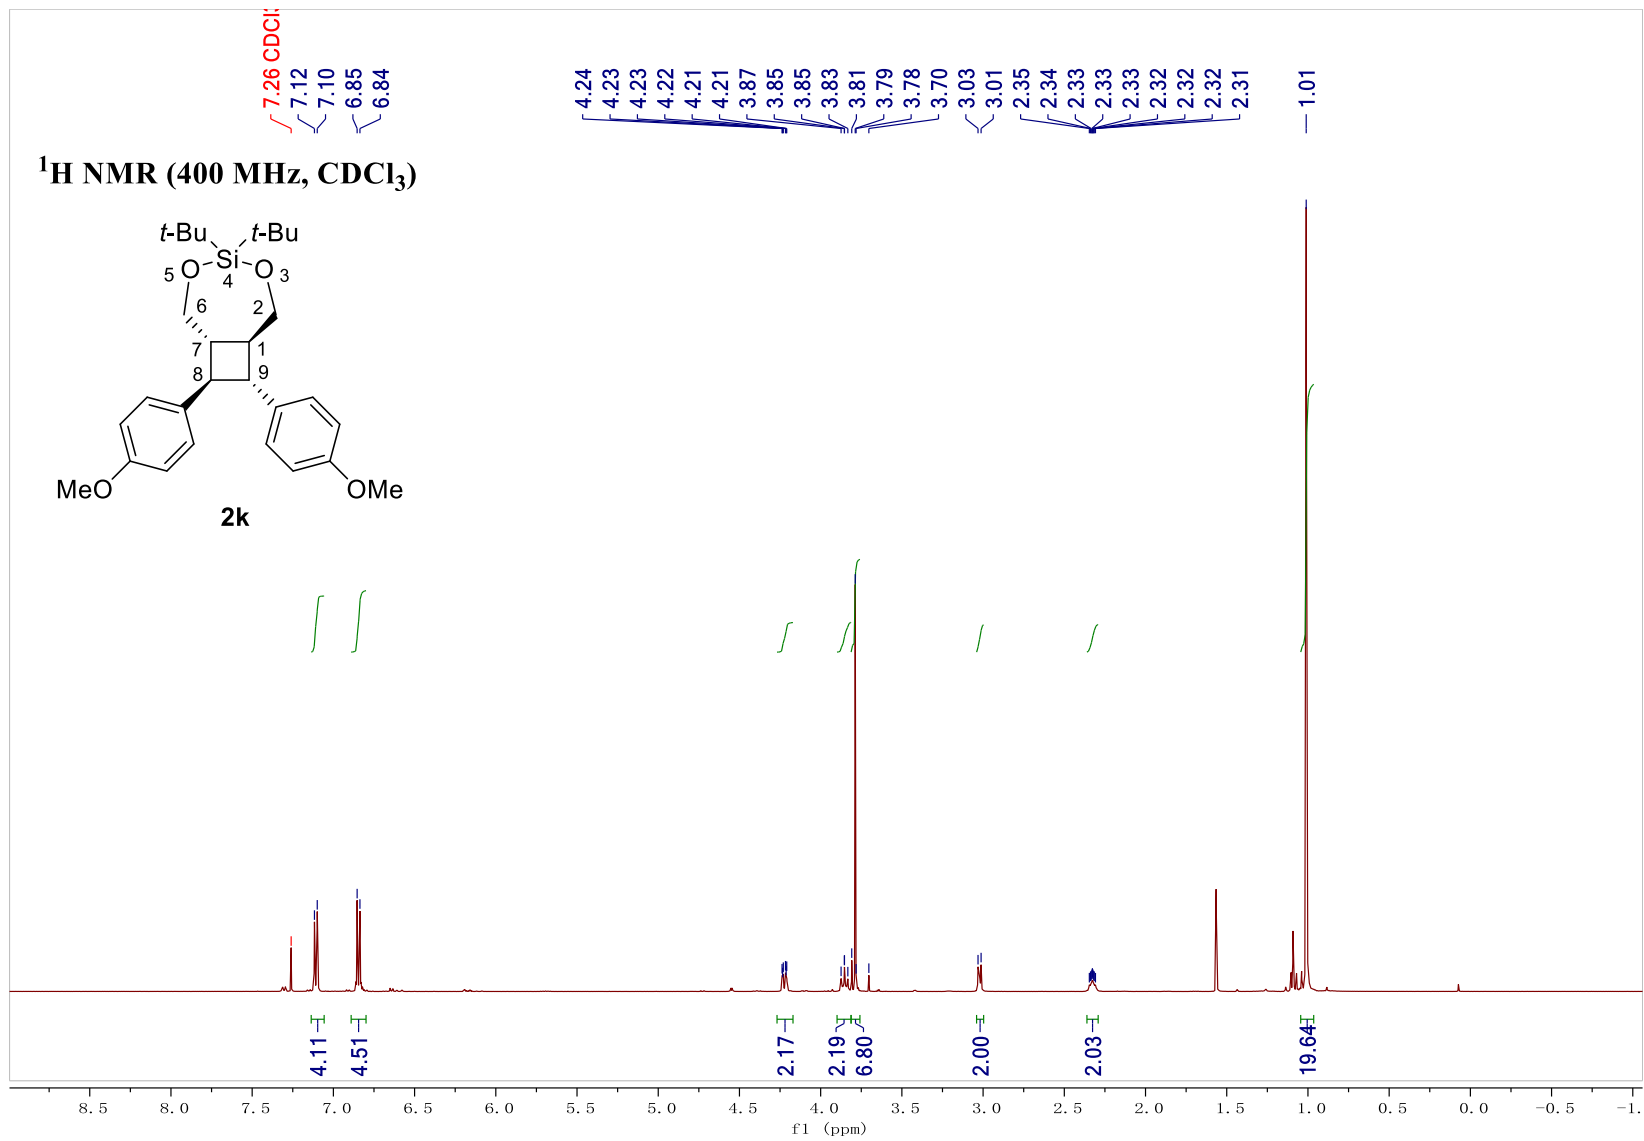

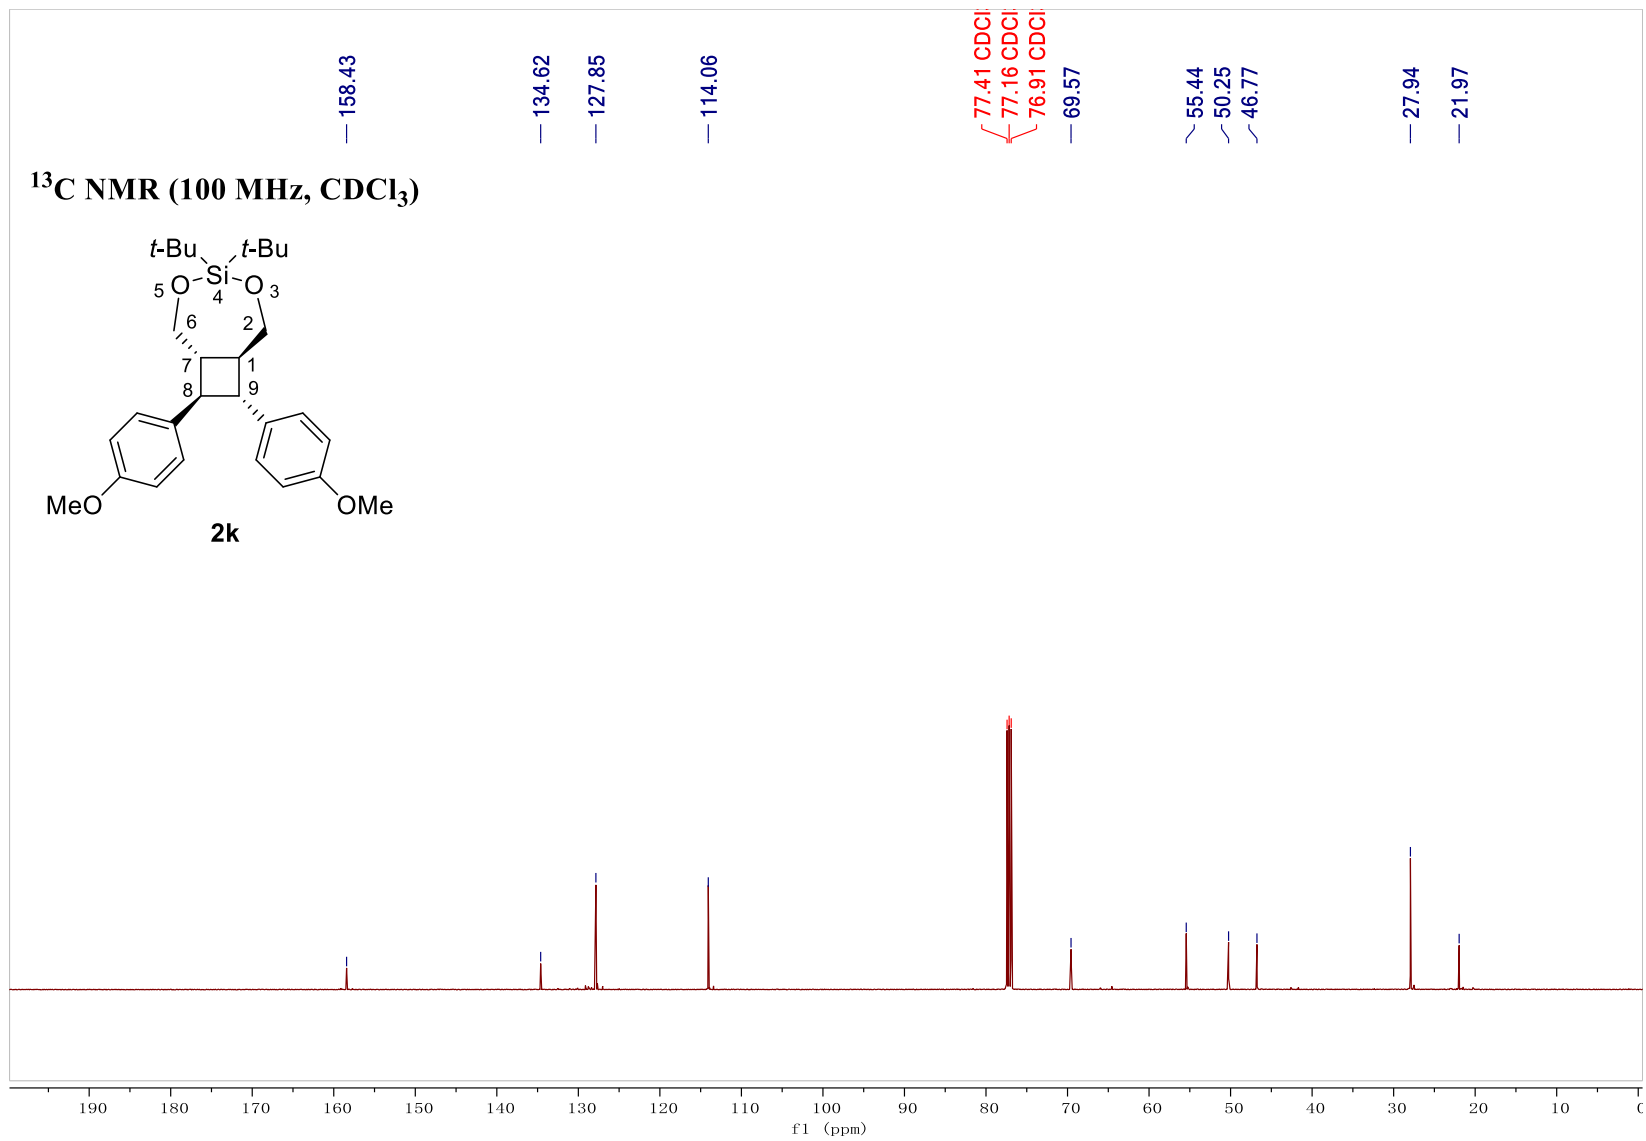



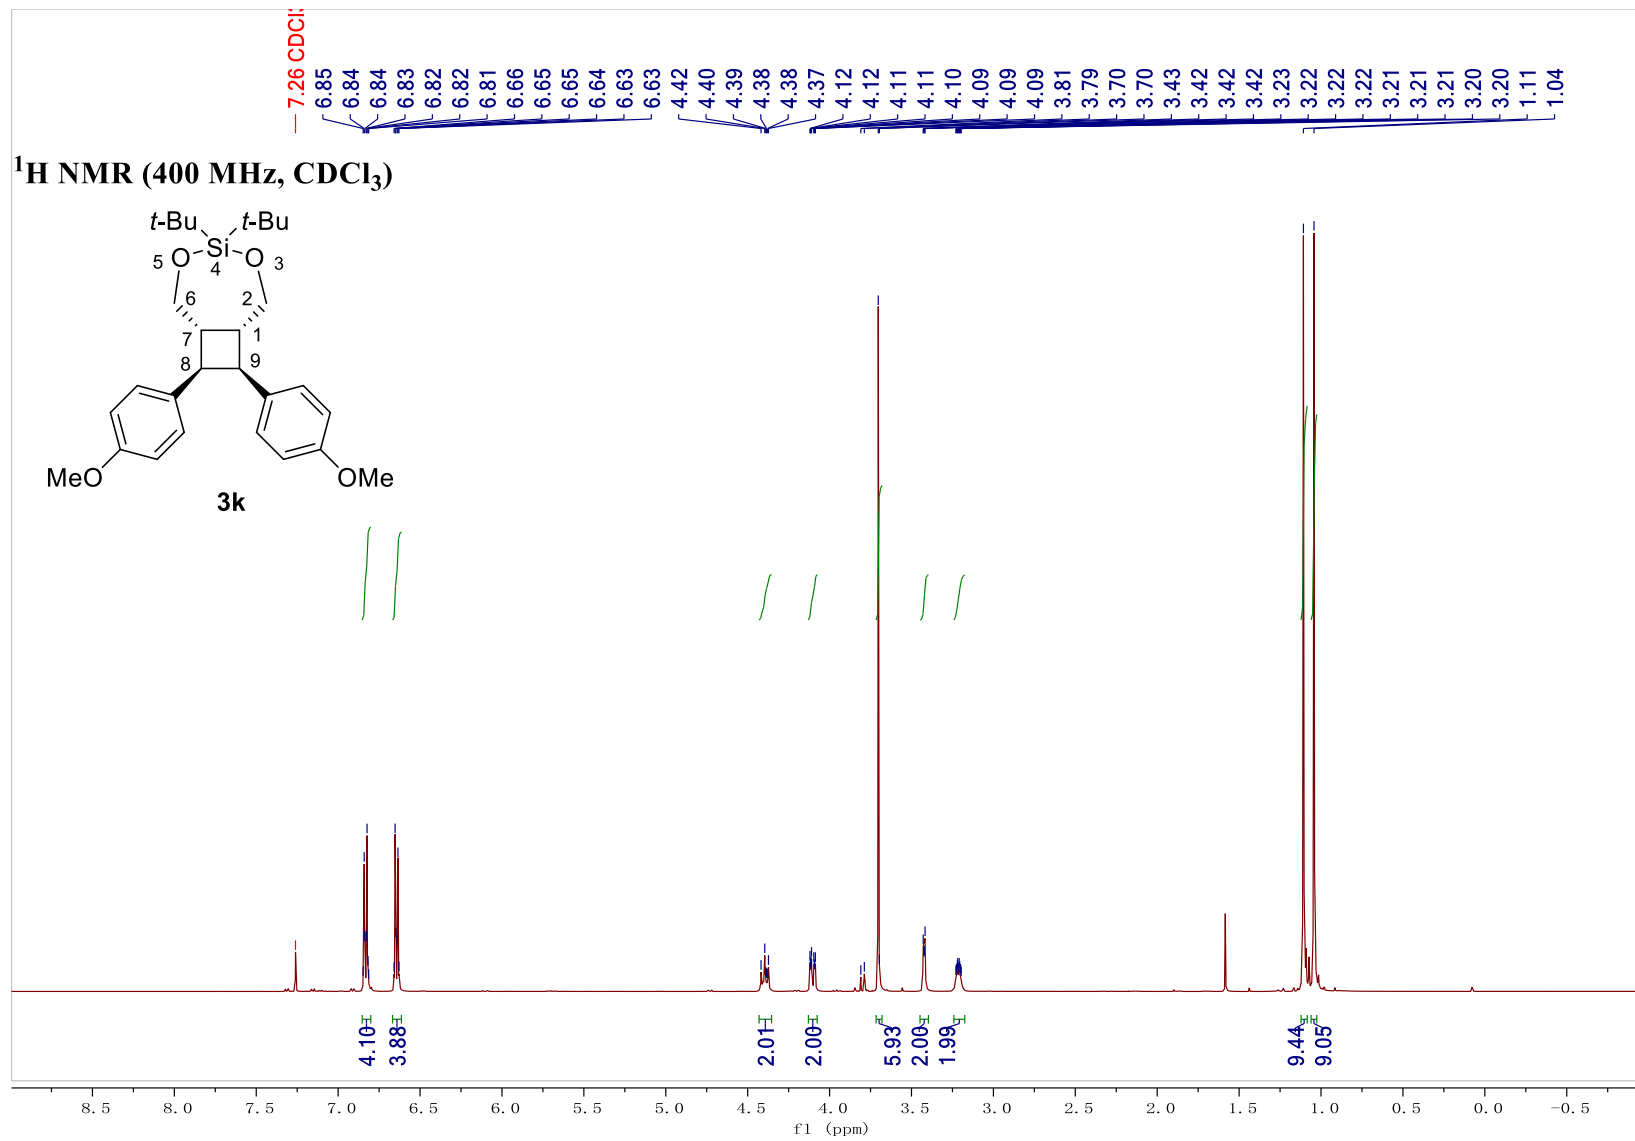

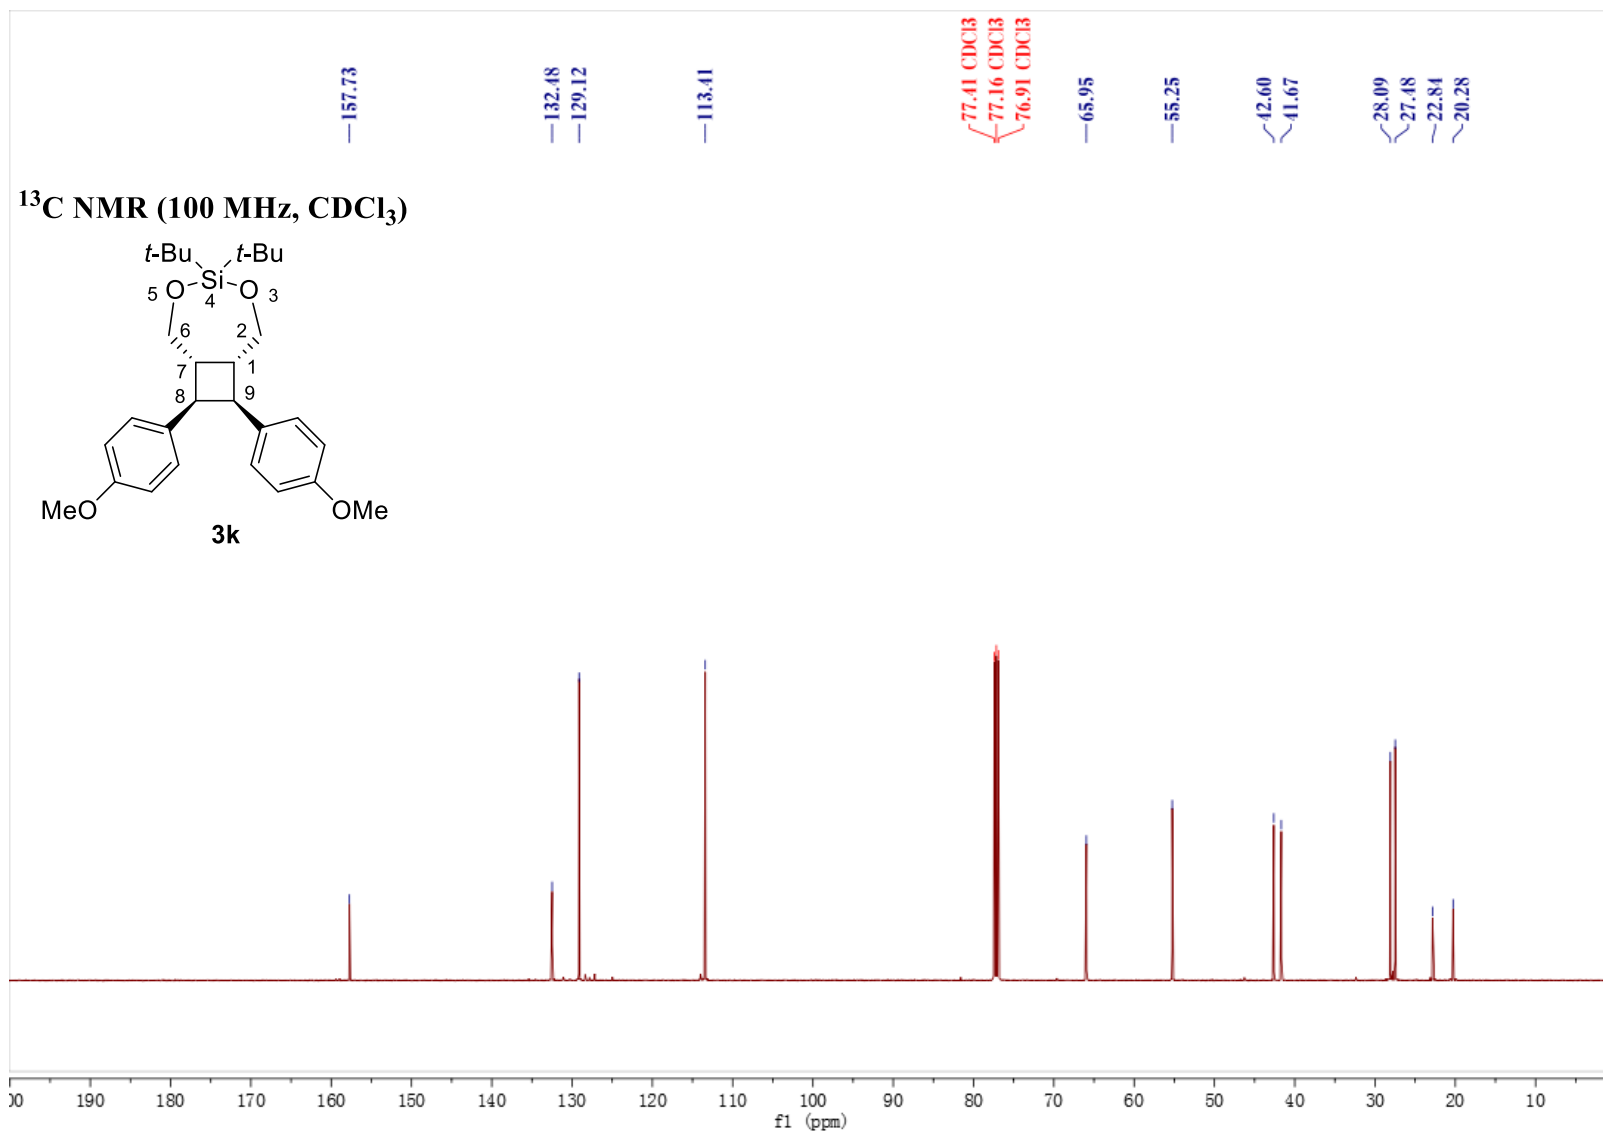

**$^1\text{H} - ^1\text{H}$  COSY - 90 (400 MHz,  $\text{CDCl}_3$ )**

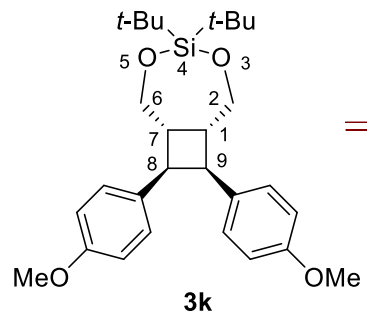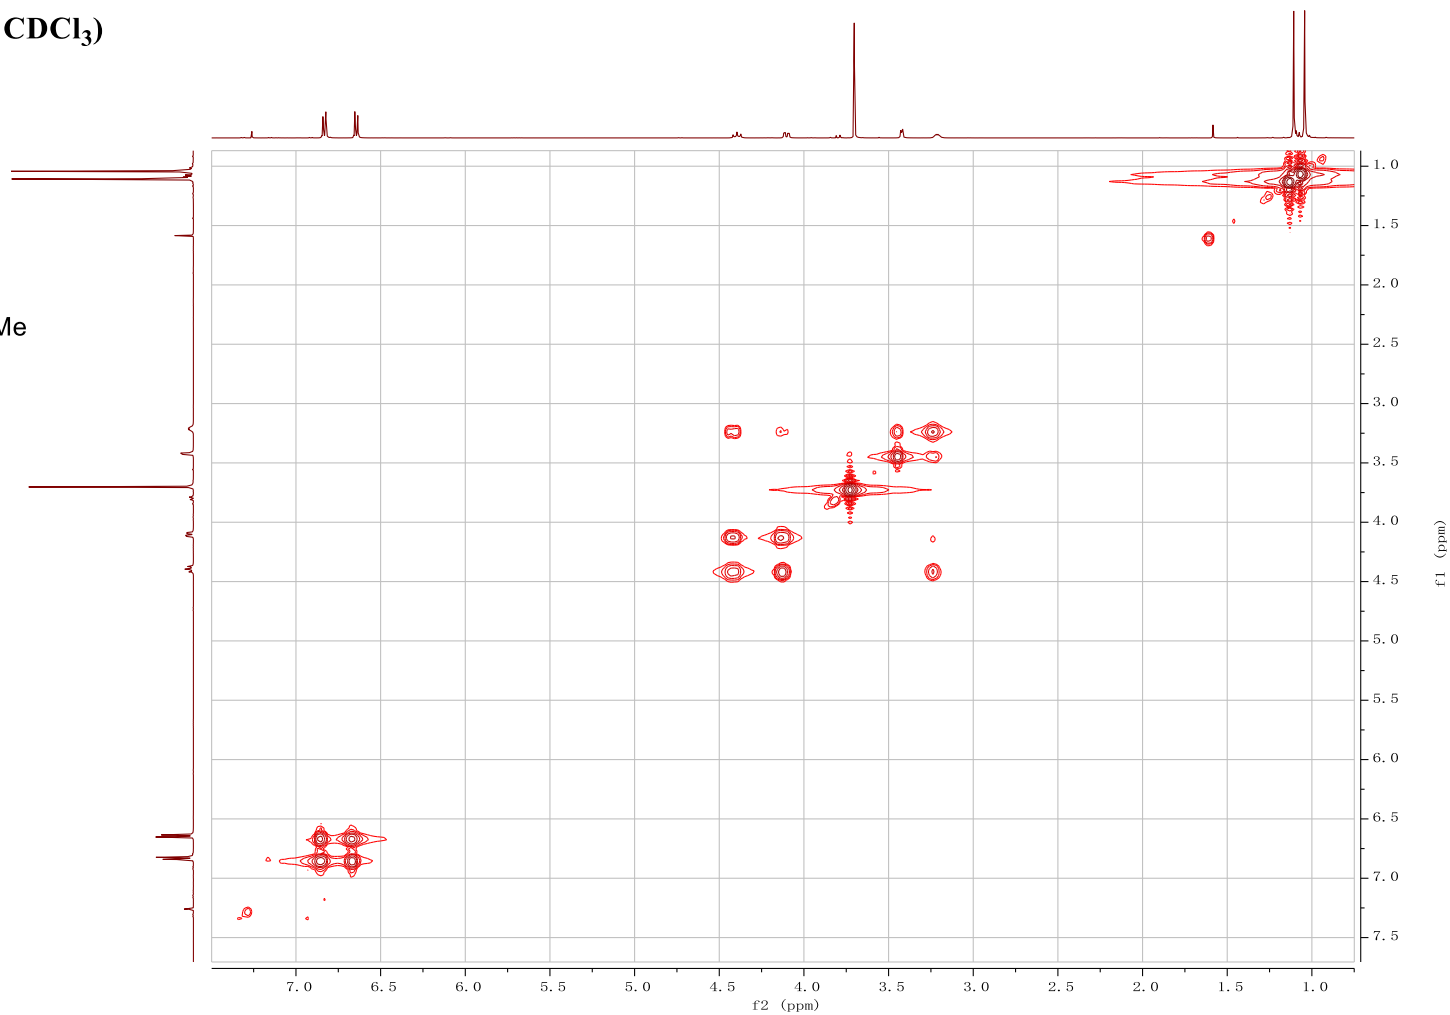

$^1\text{H}$  (400 MHz) -  $^{13}\text{C}$  (100 MHz) HSQC ( $\text{CDCl}_3$ )

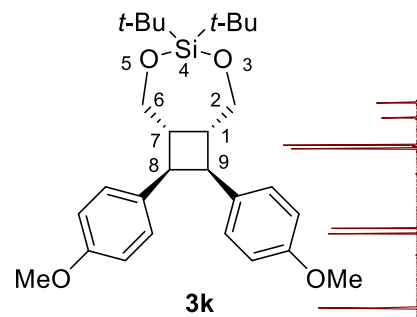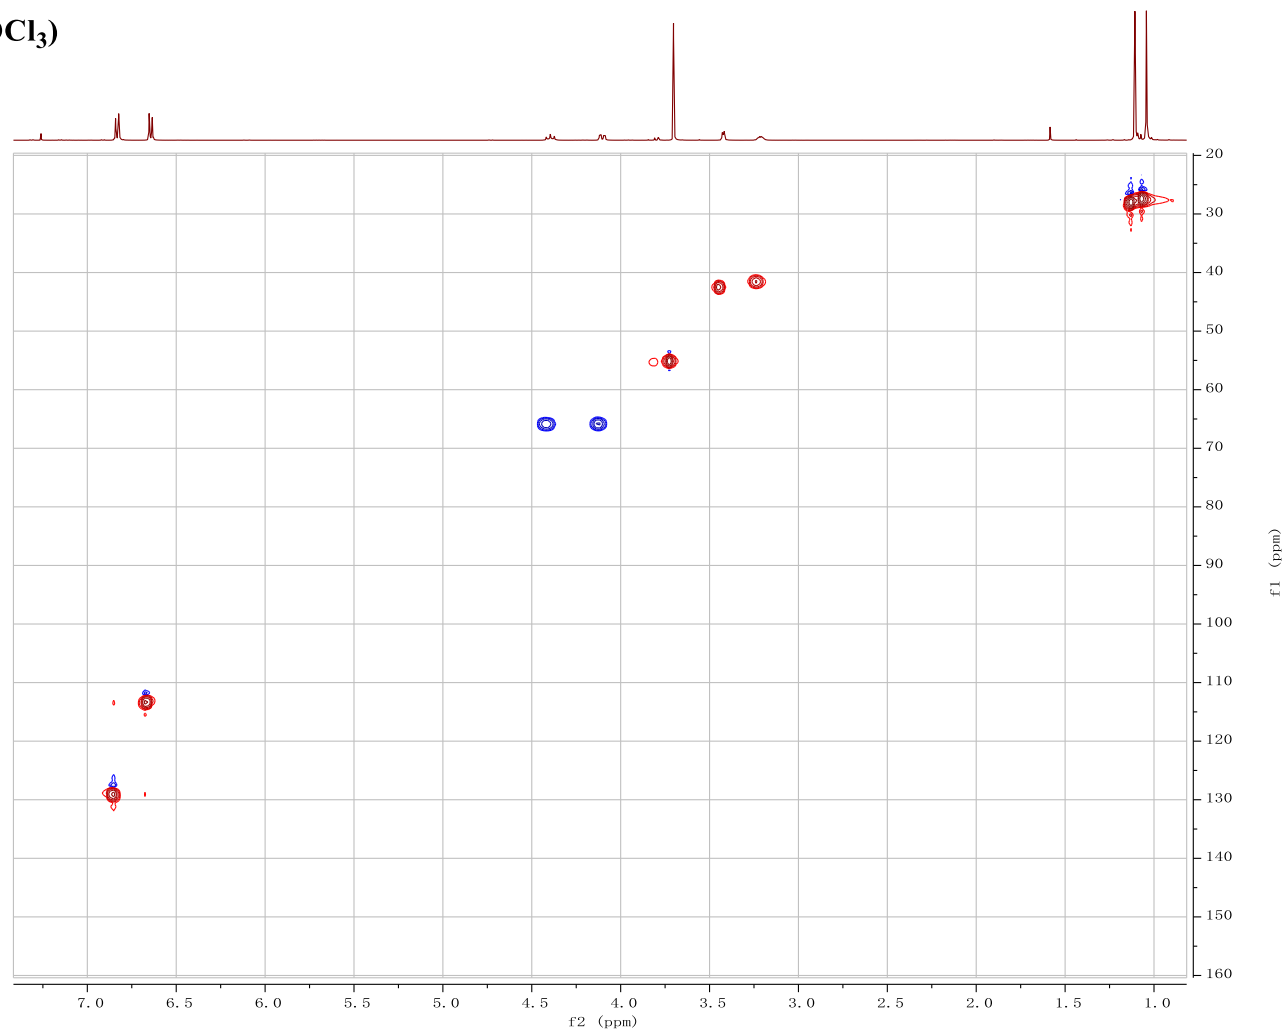

NOESY-2D (400 MHz, CDCl<sub>3</sub>)

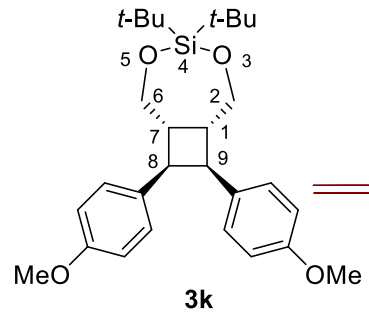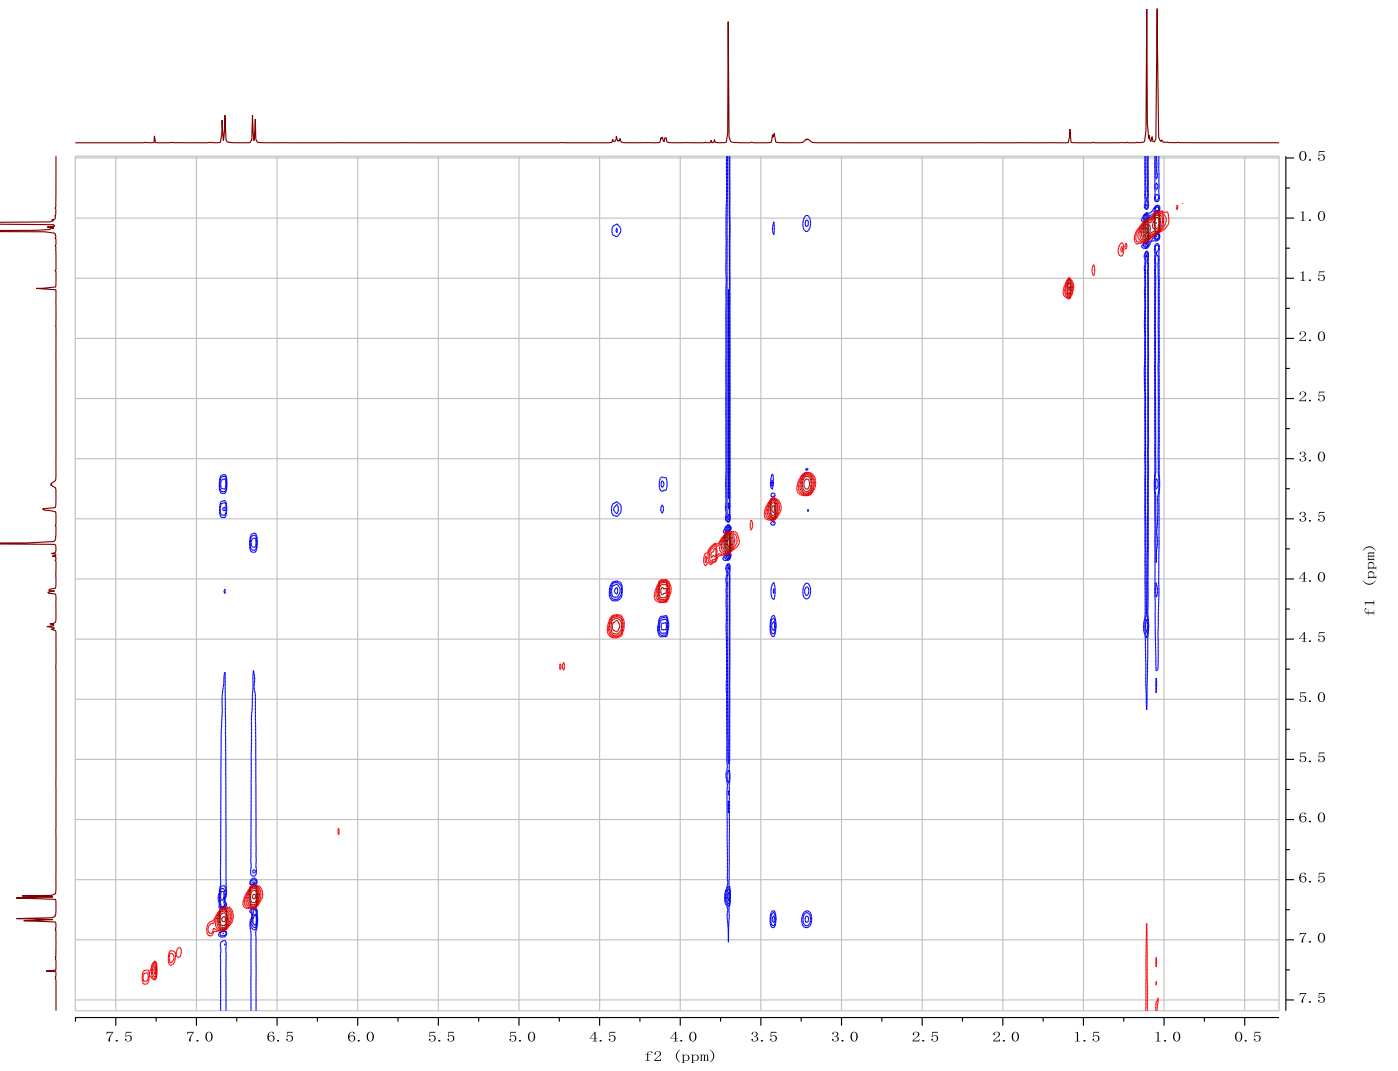

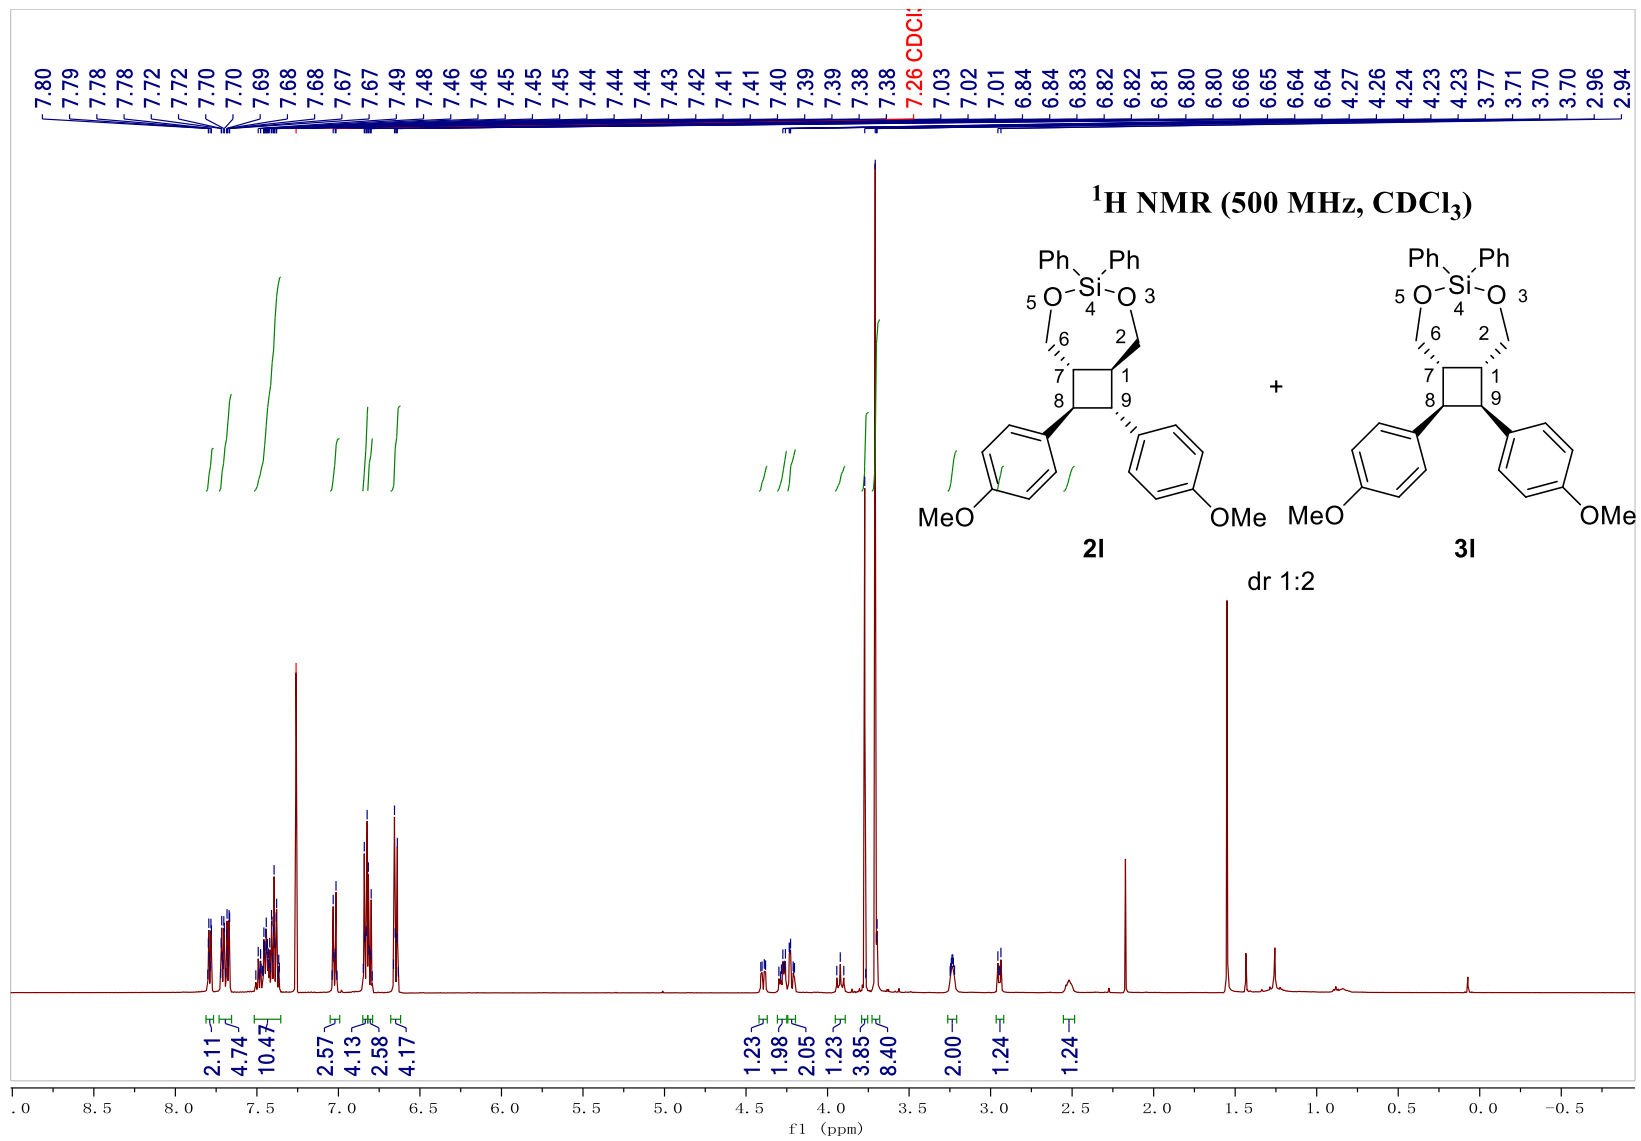

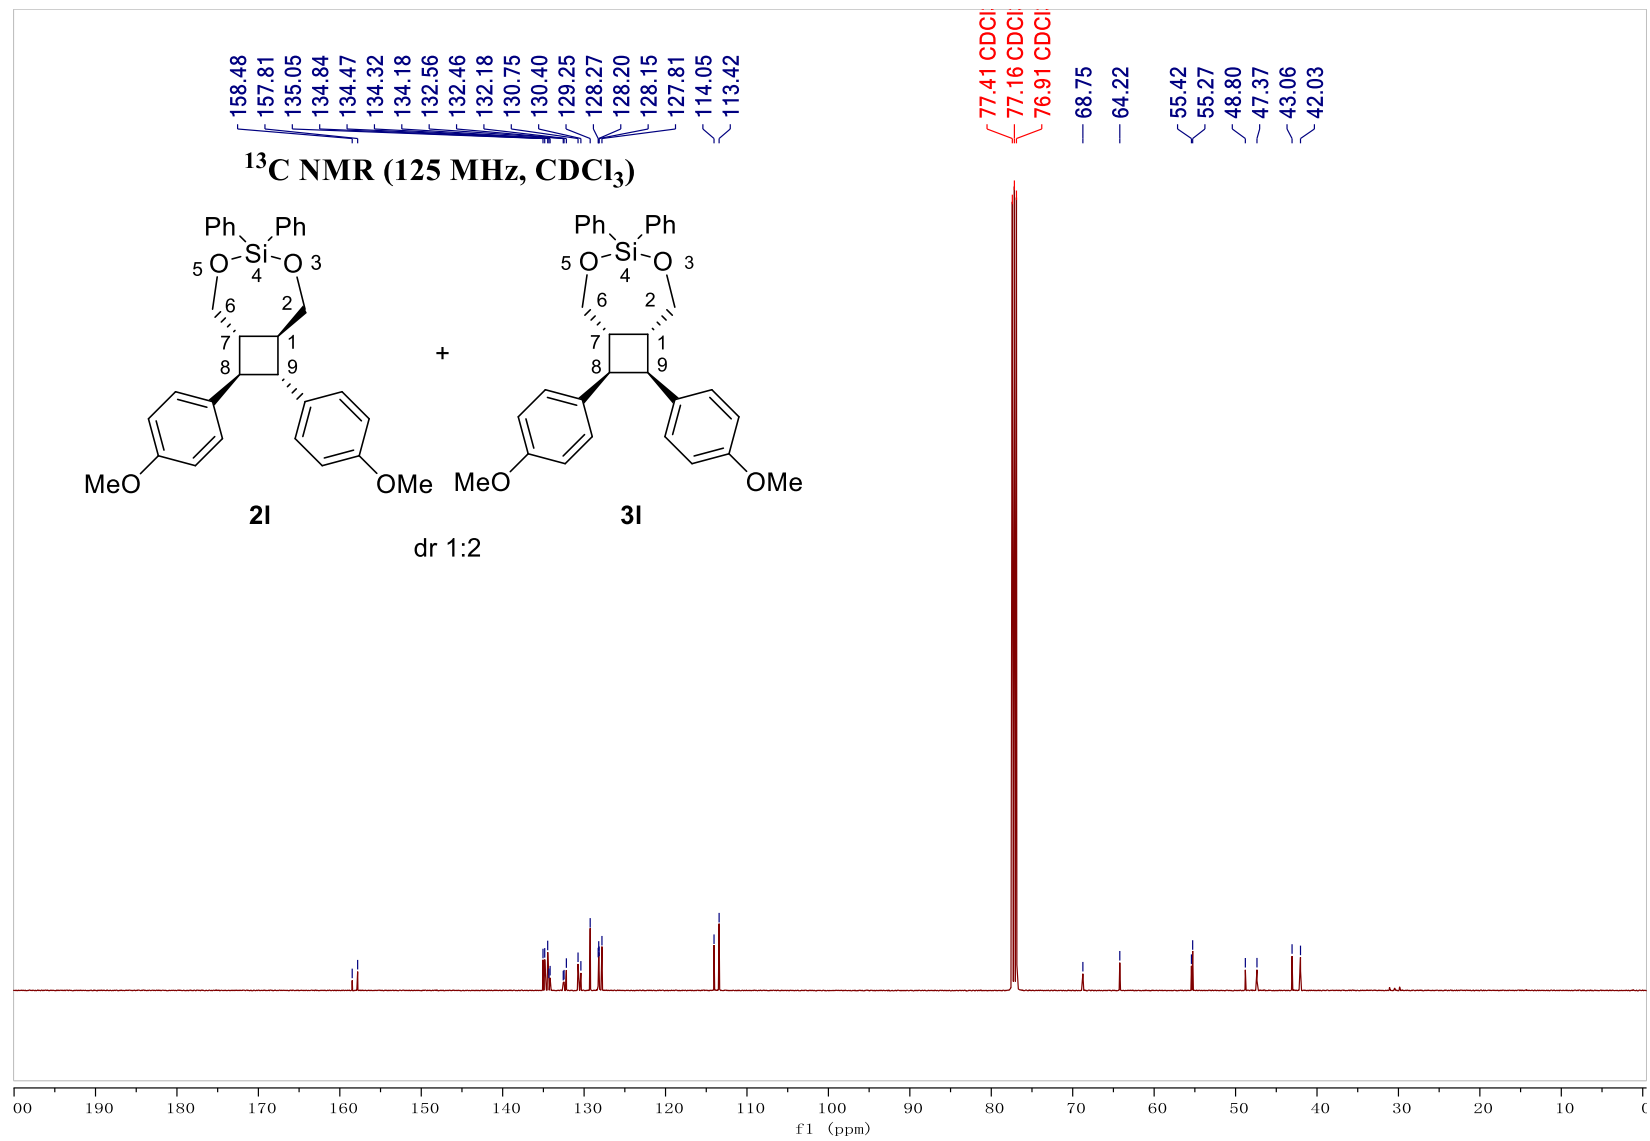

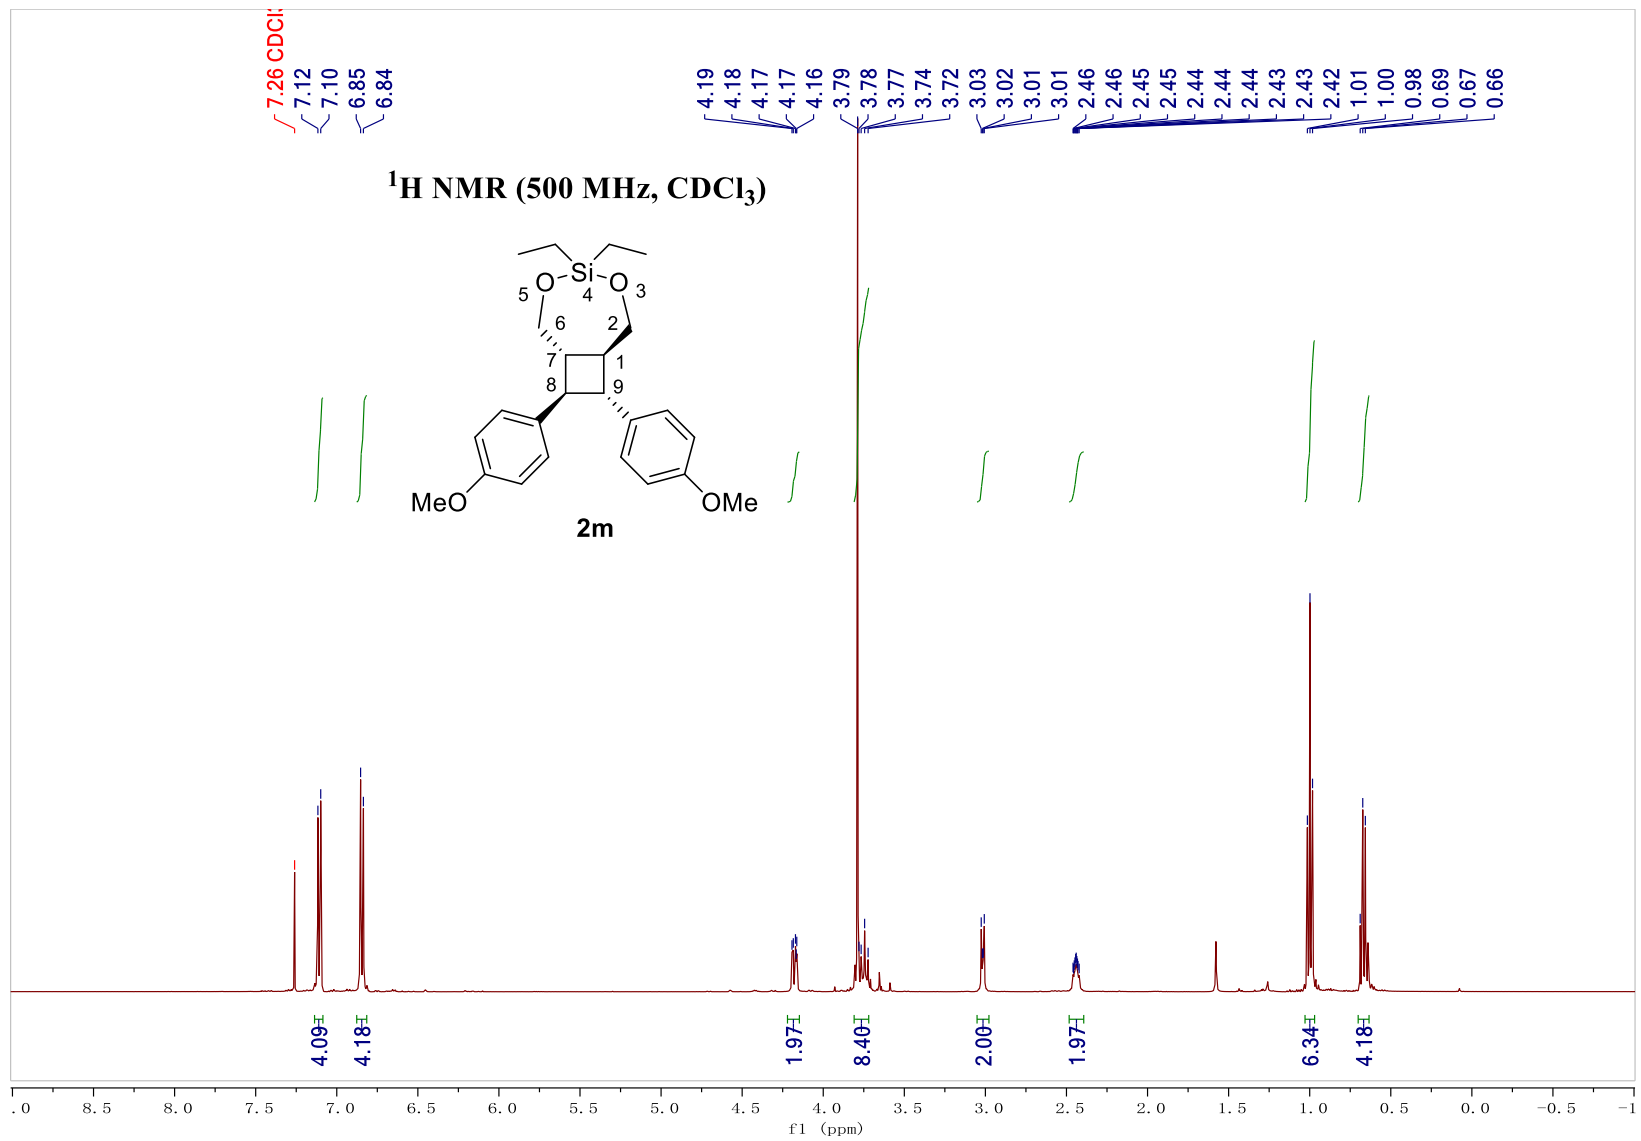



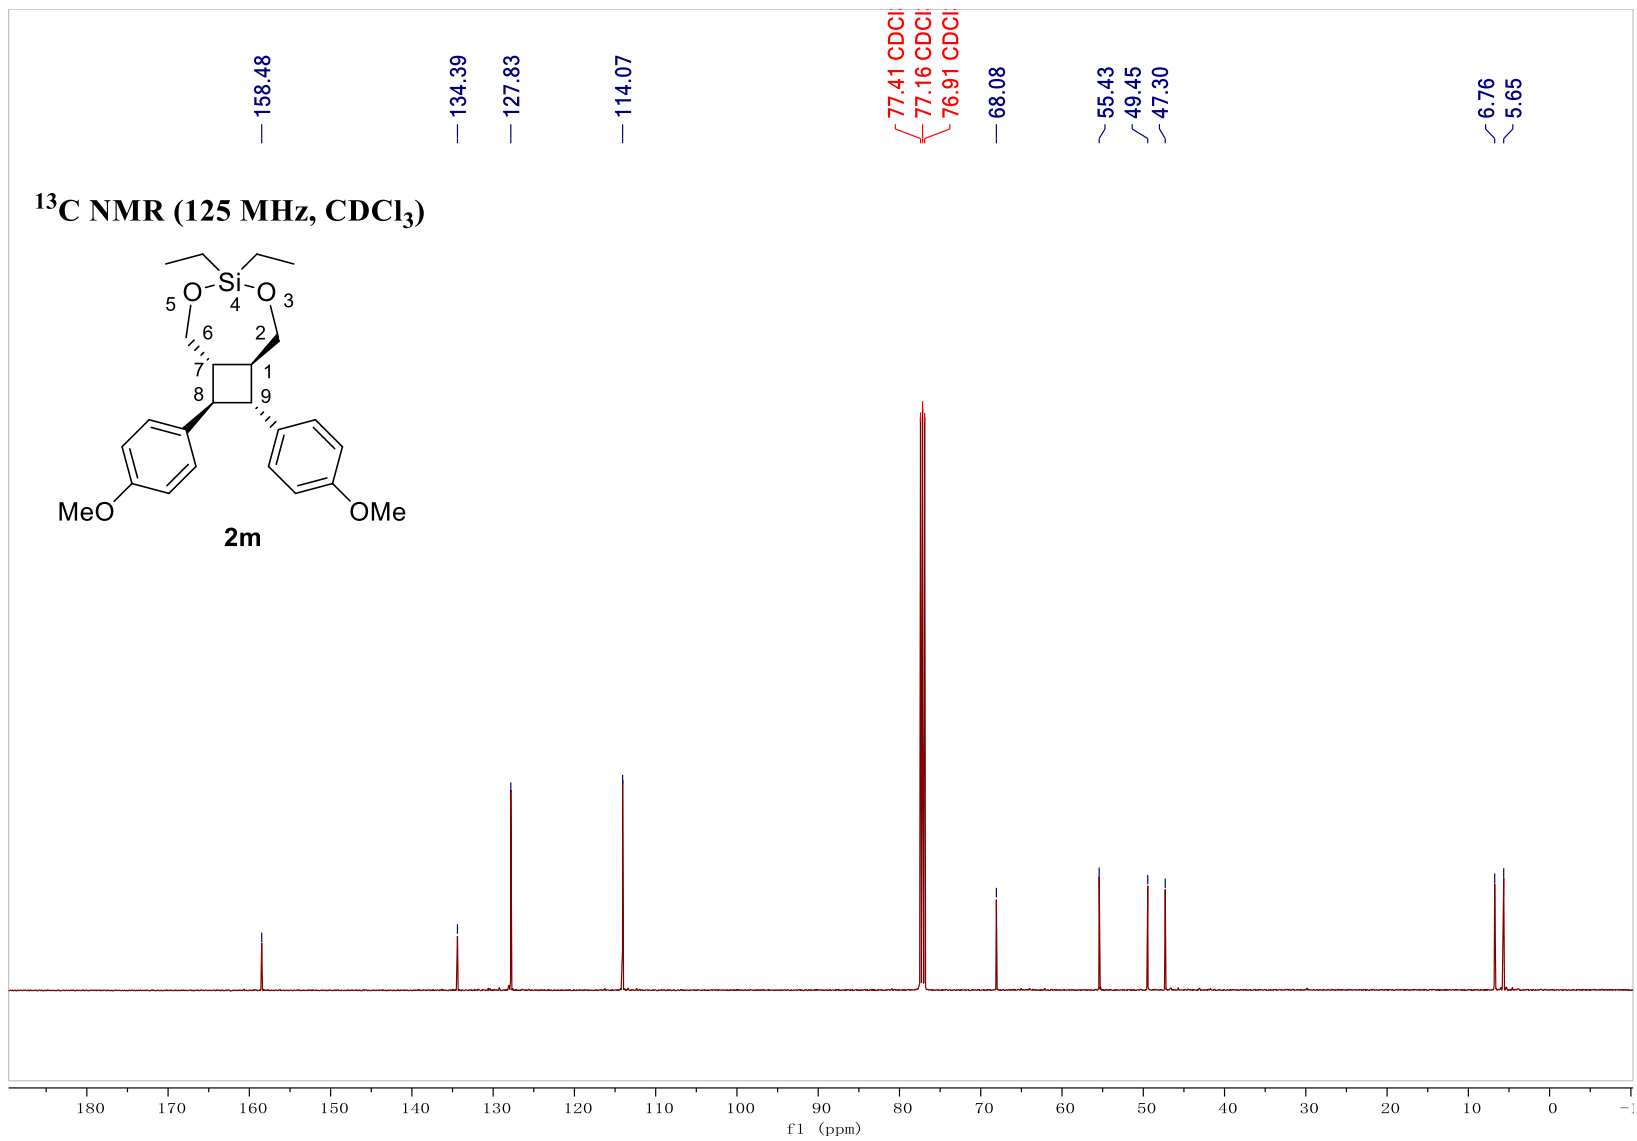

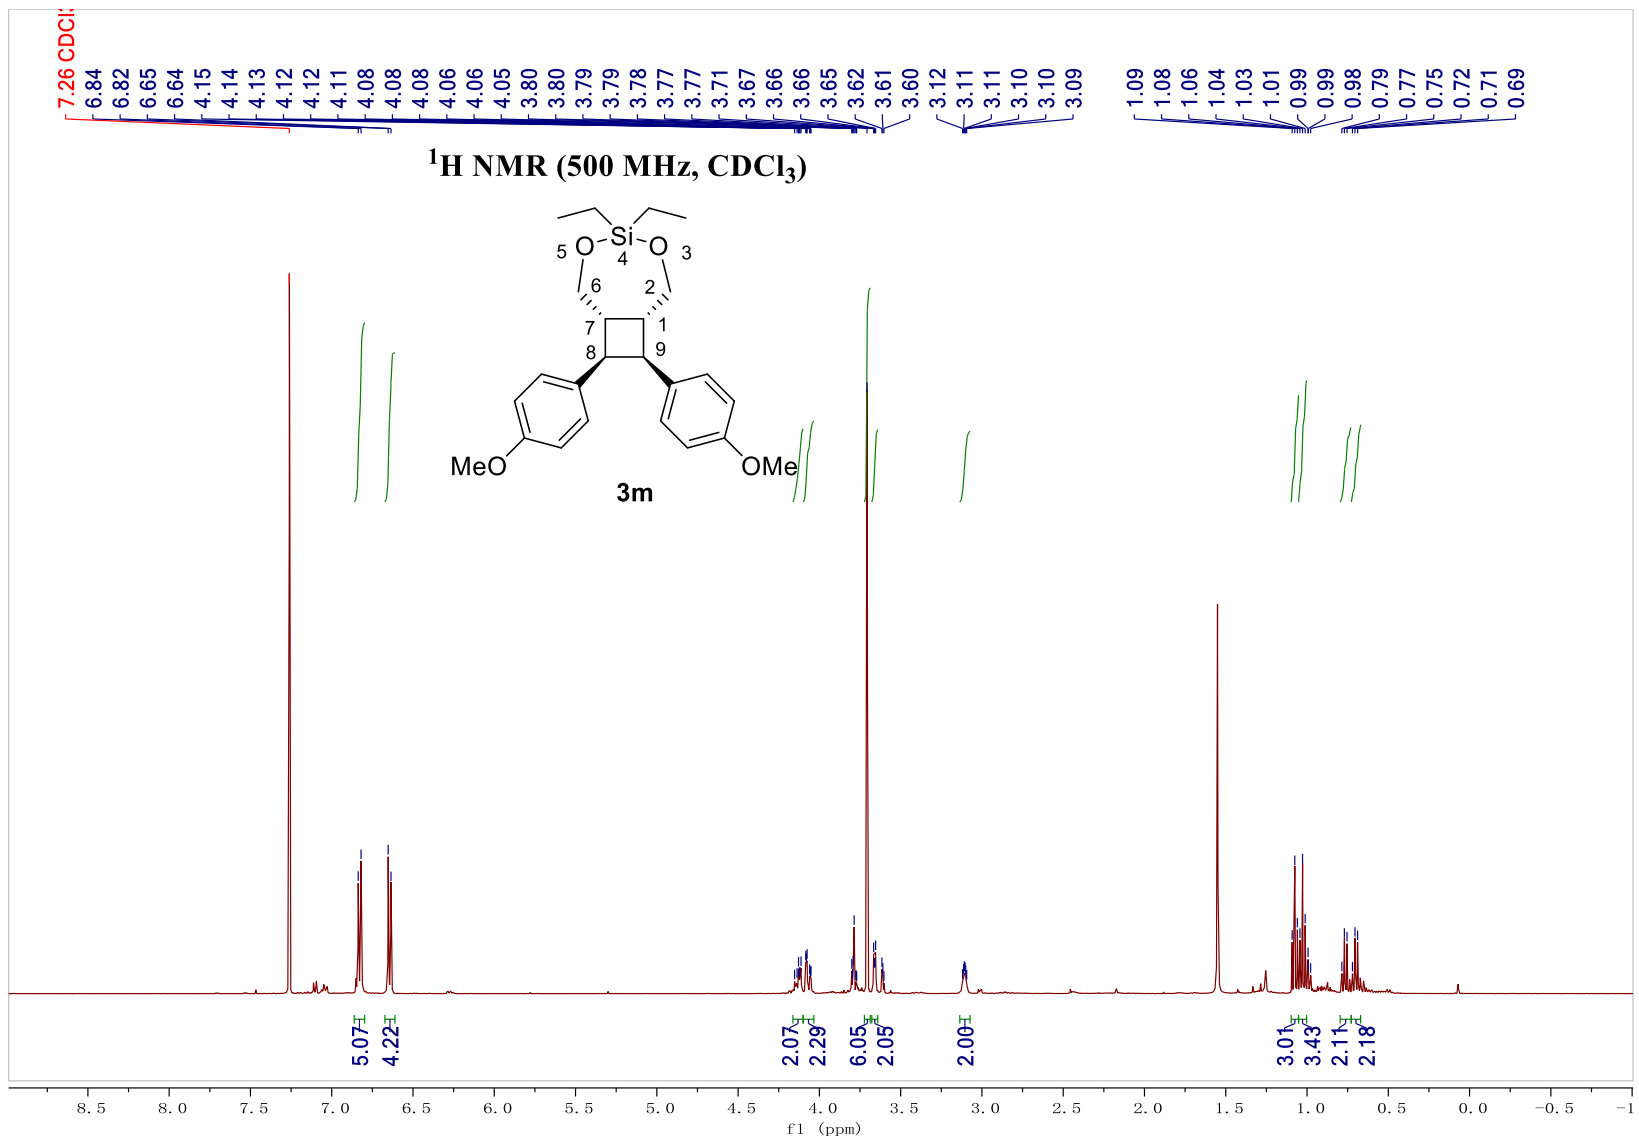

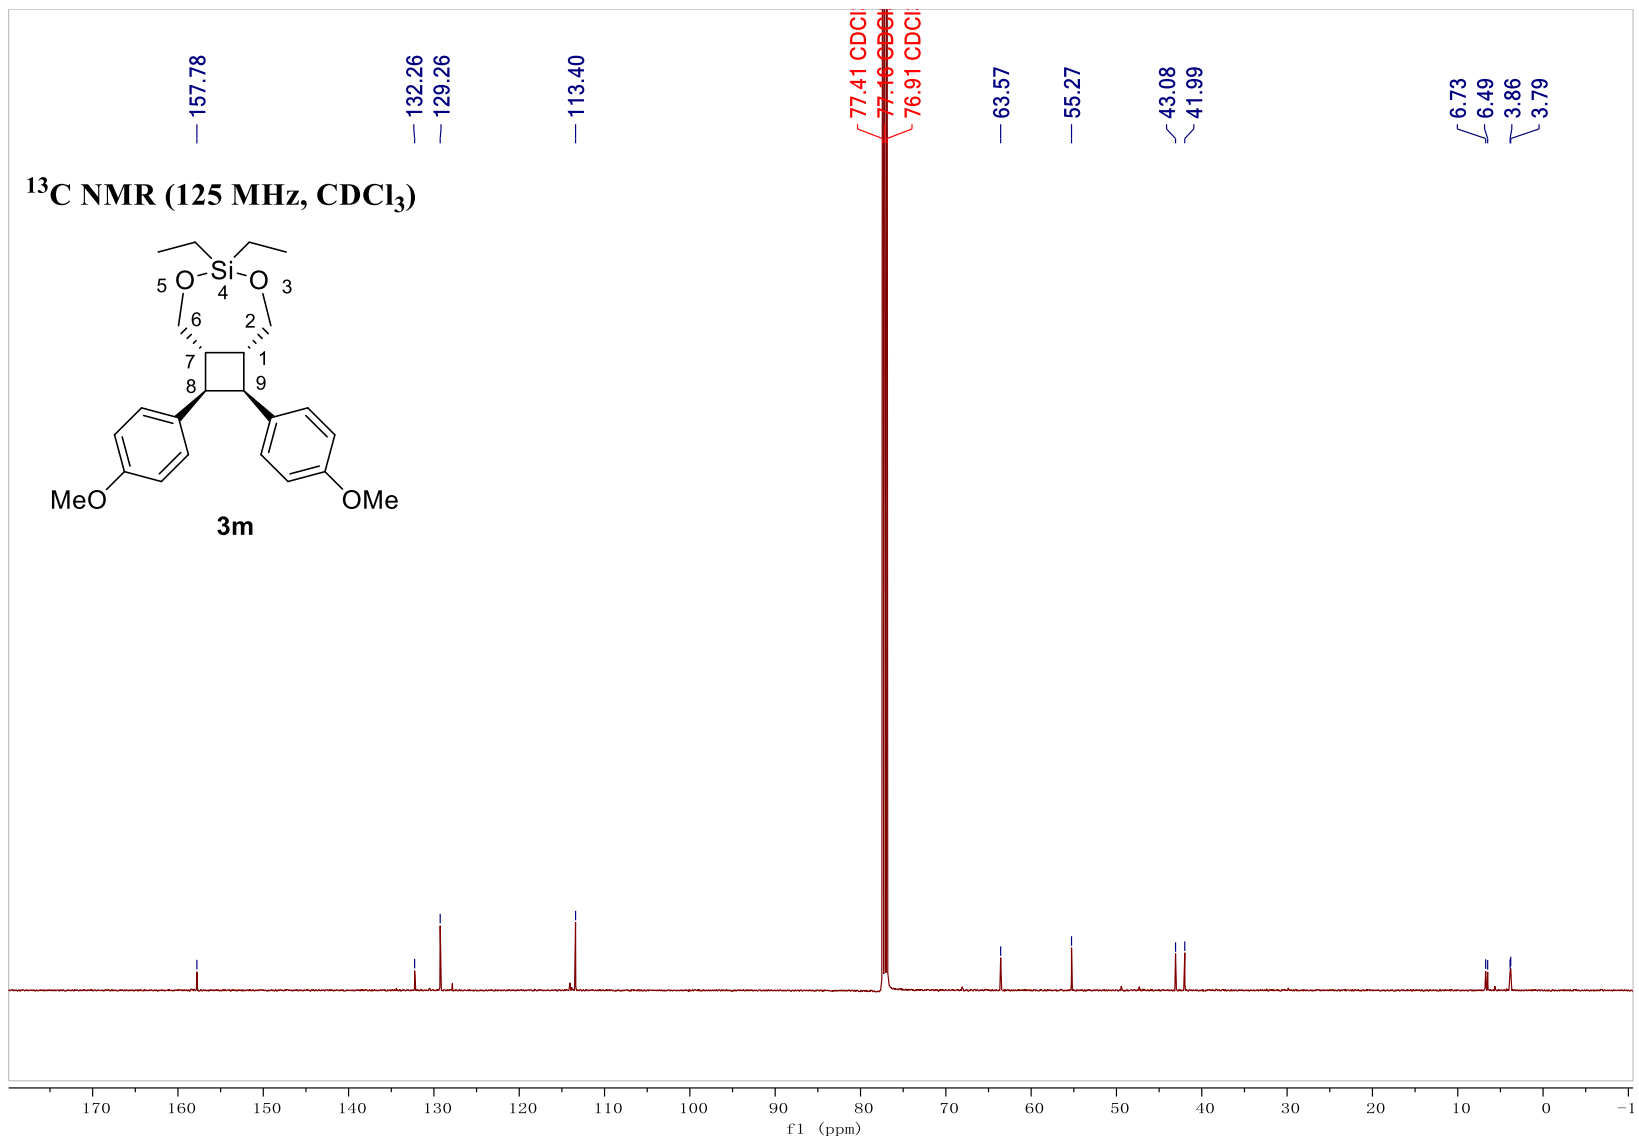

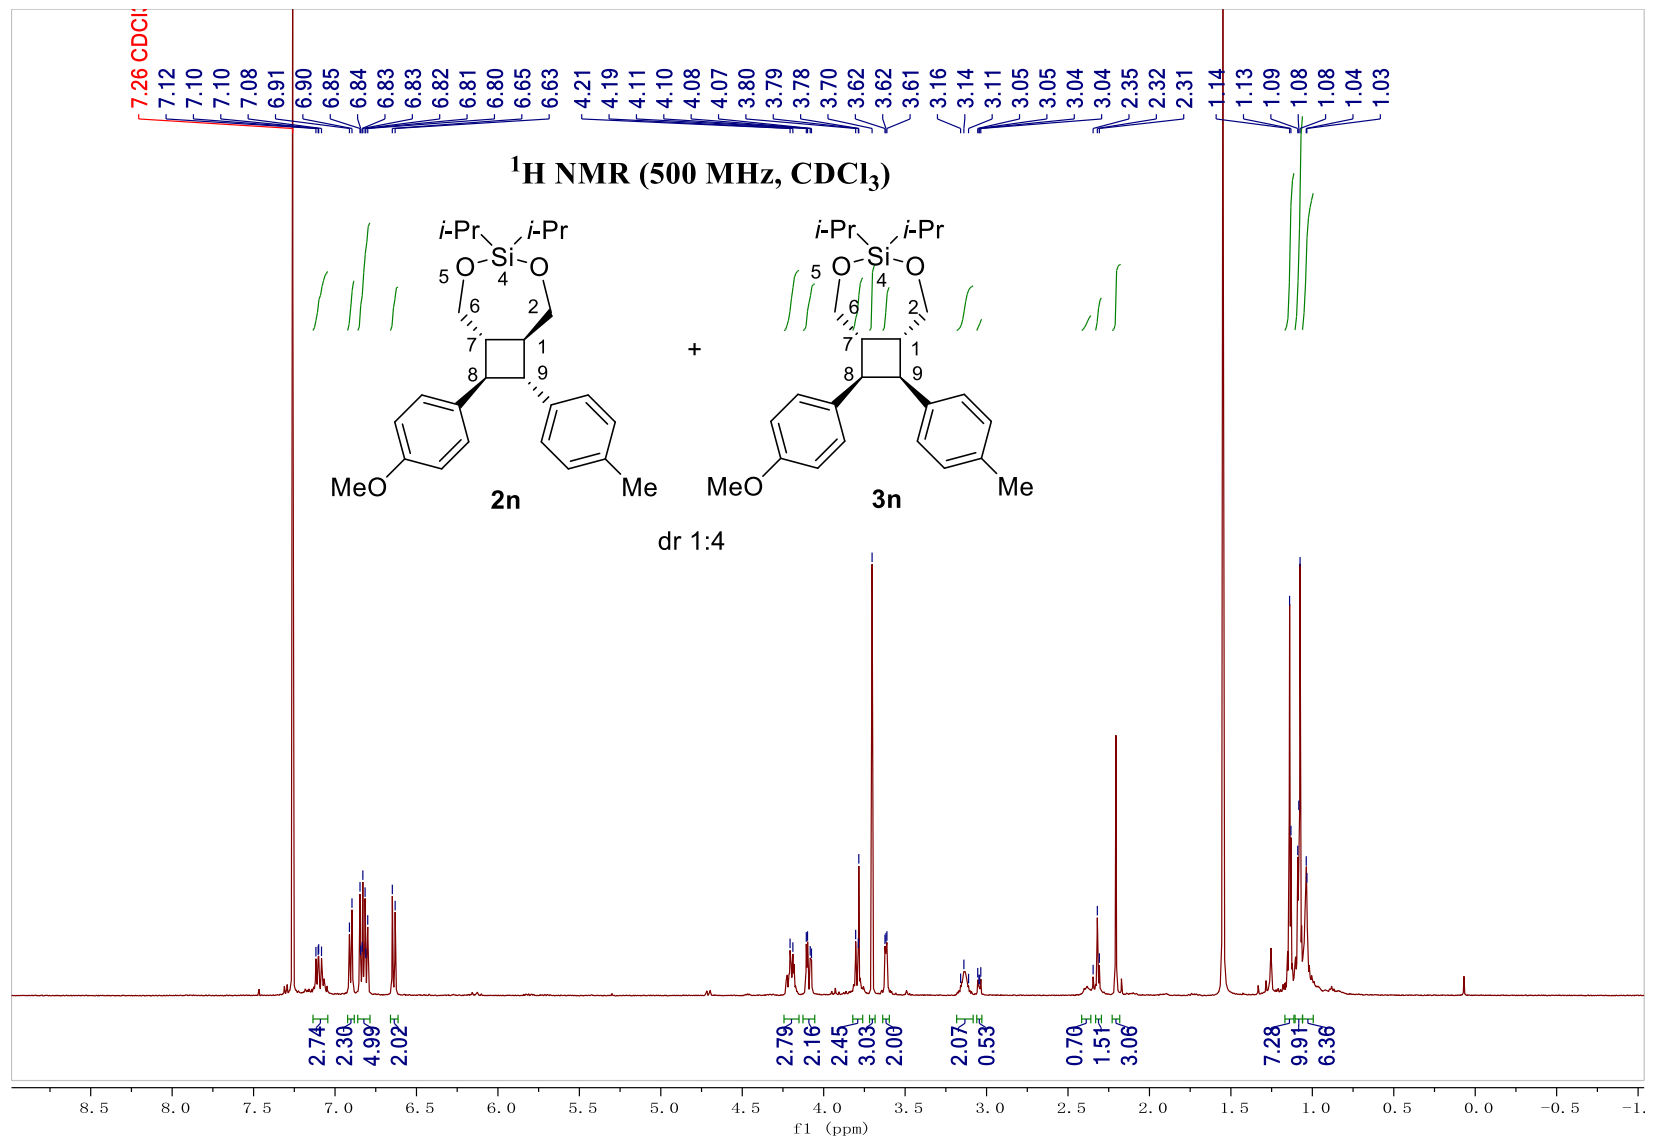

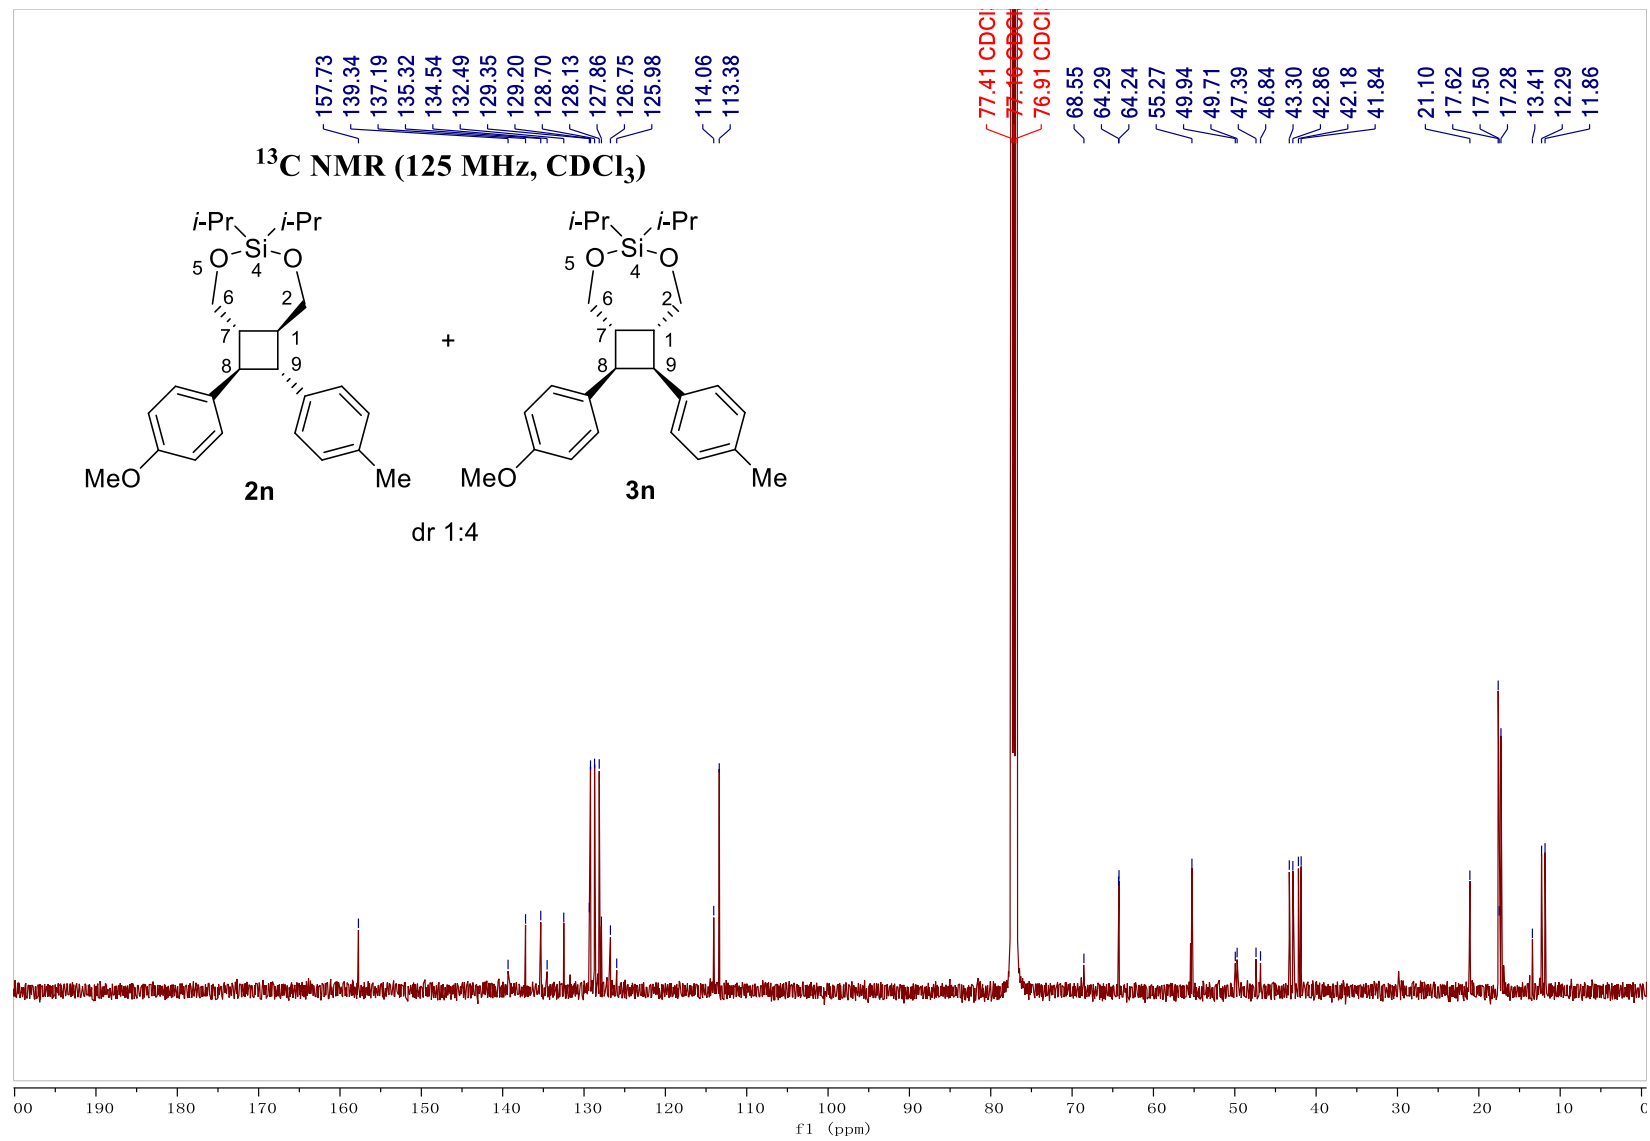

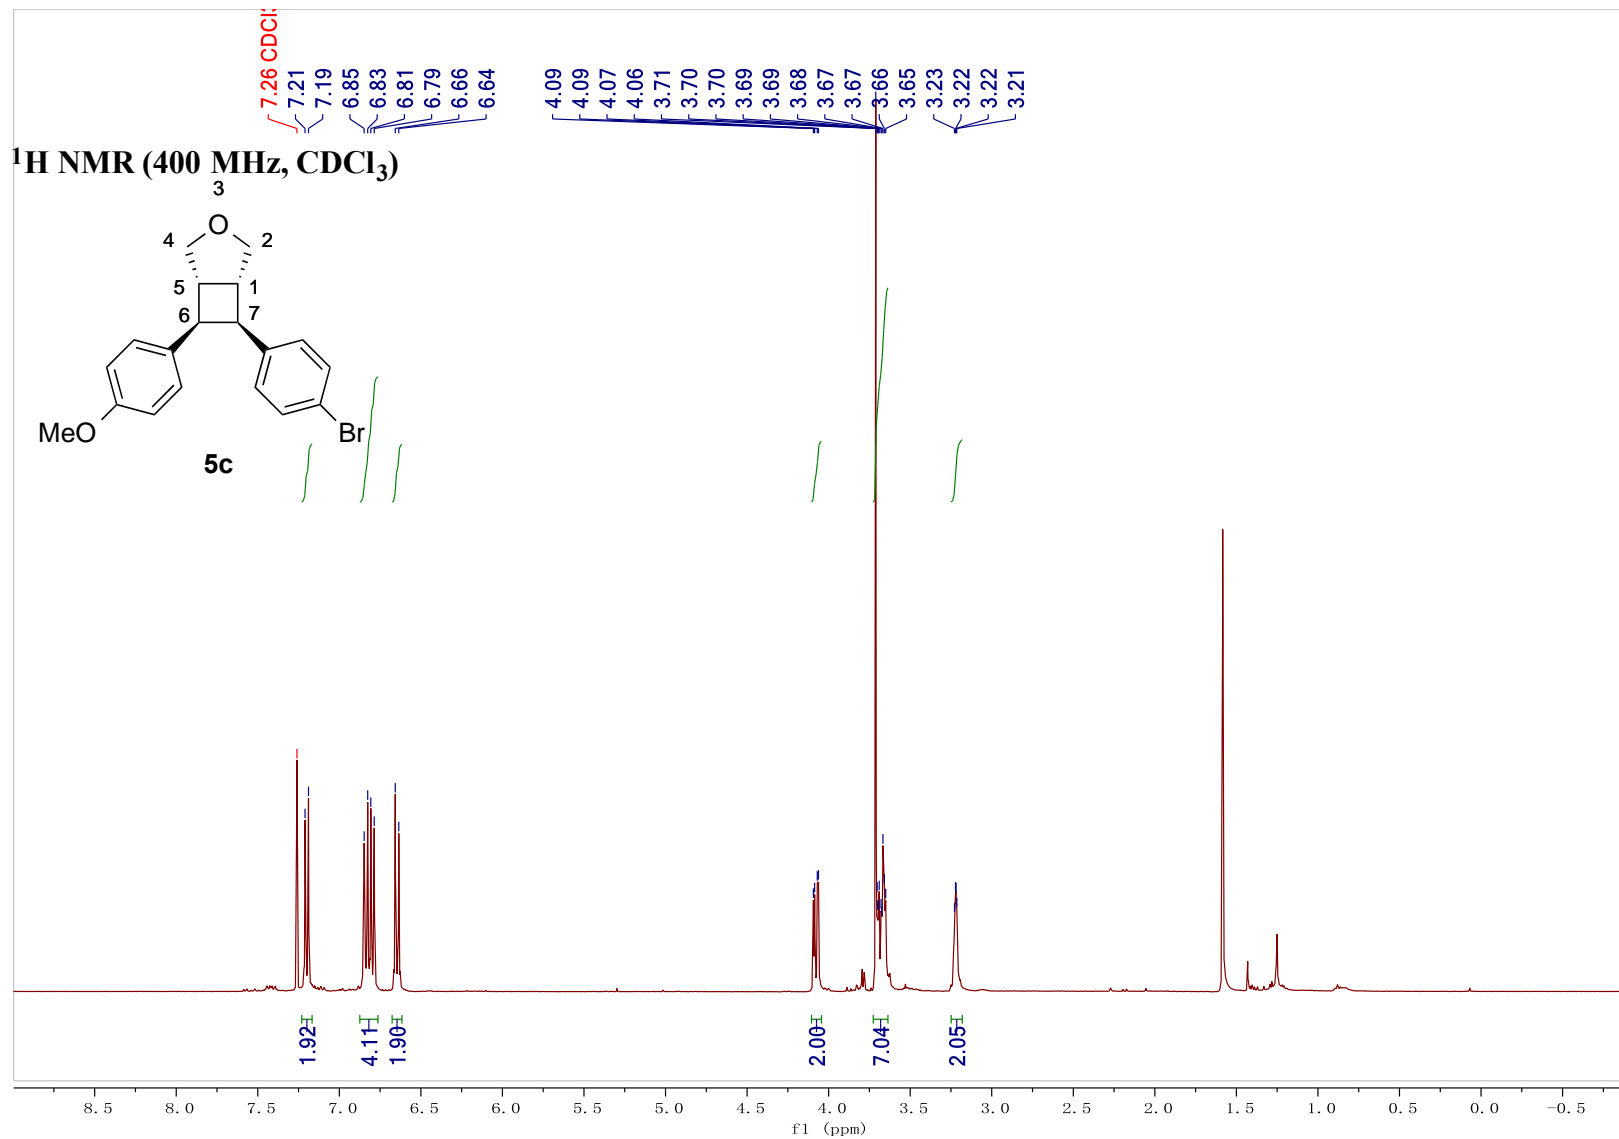

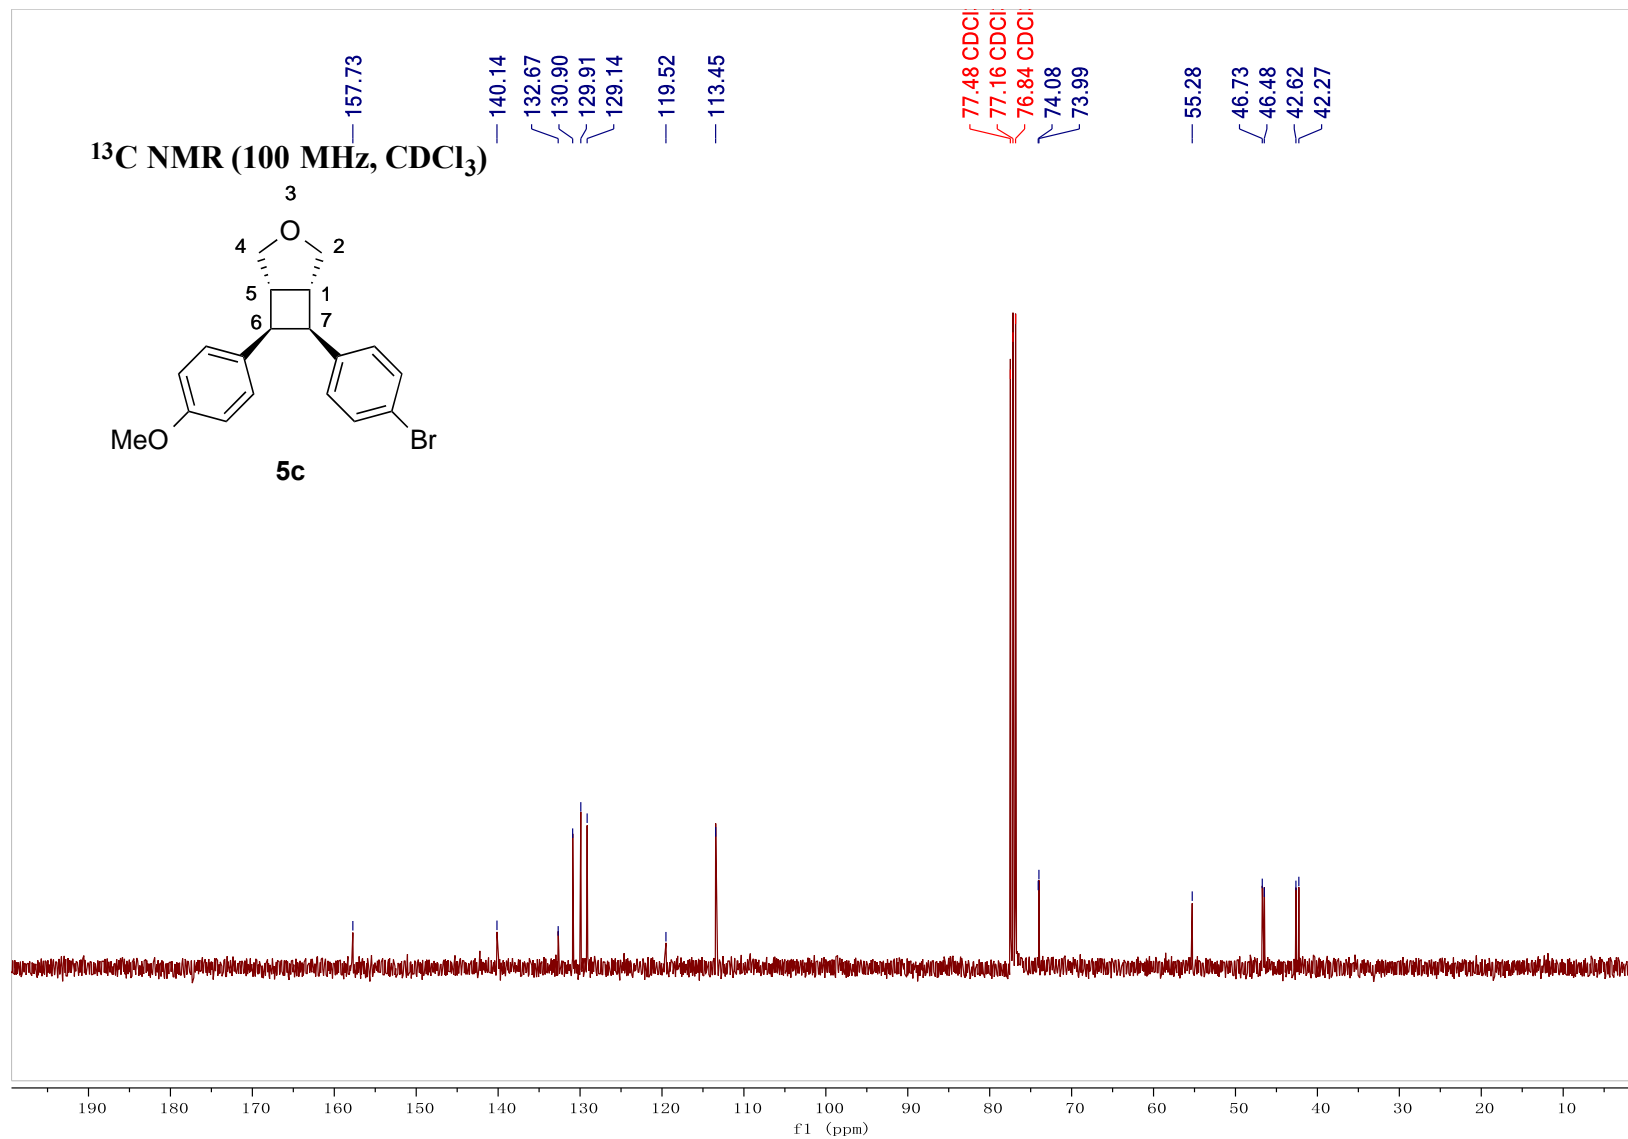

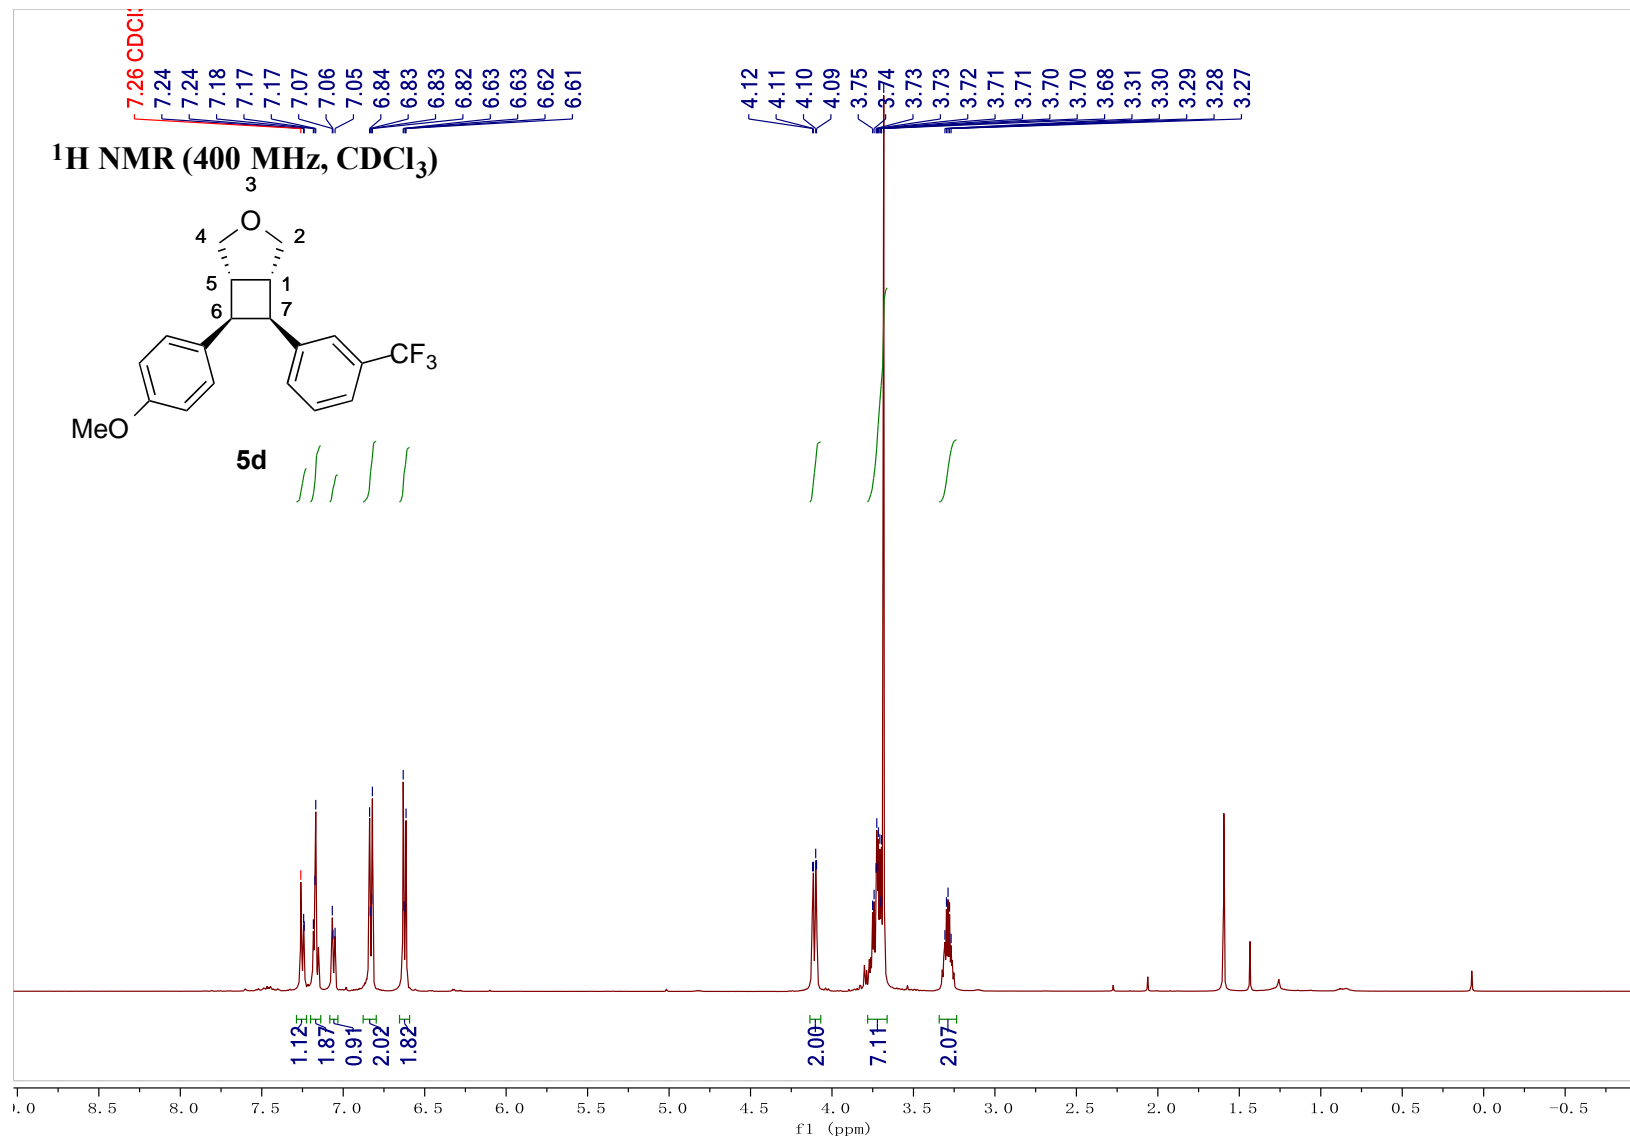



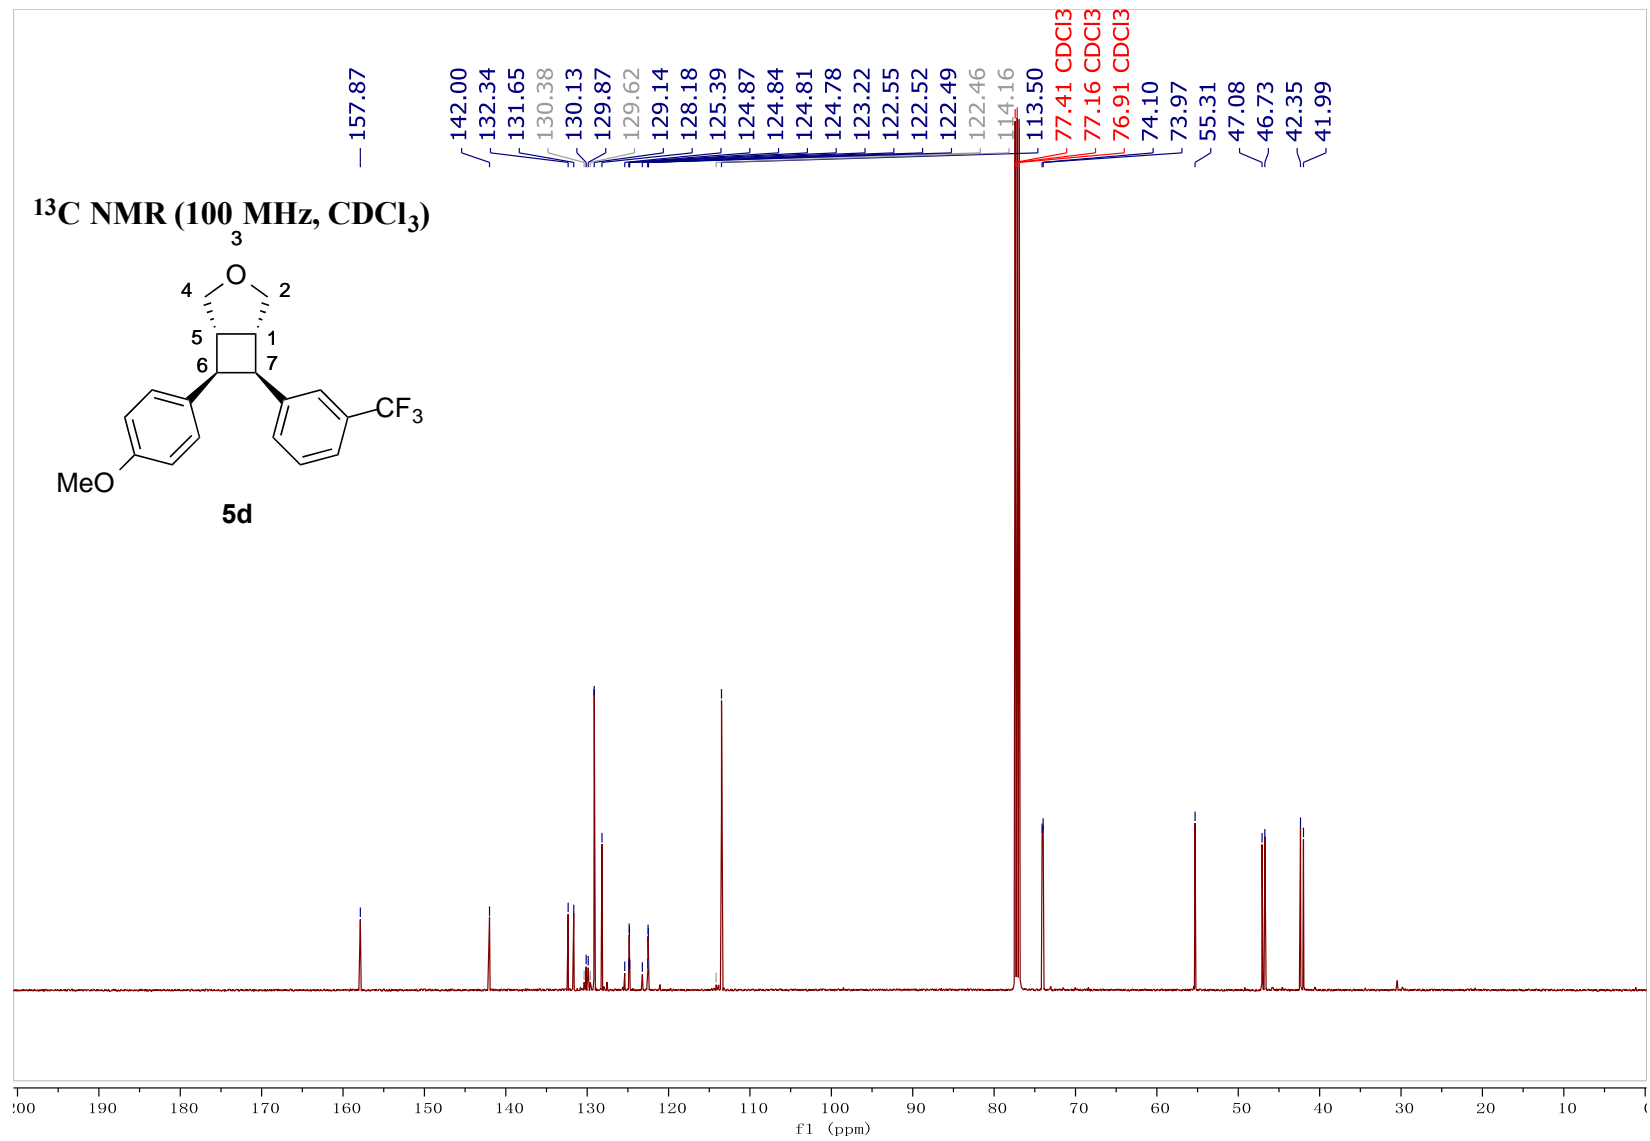

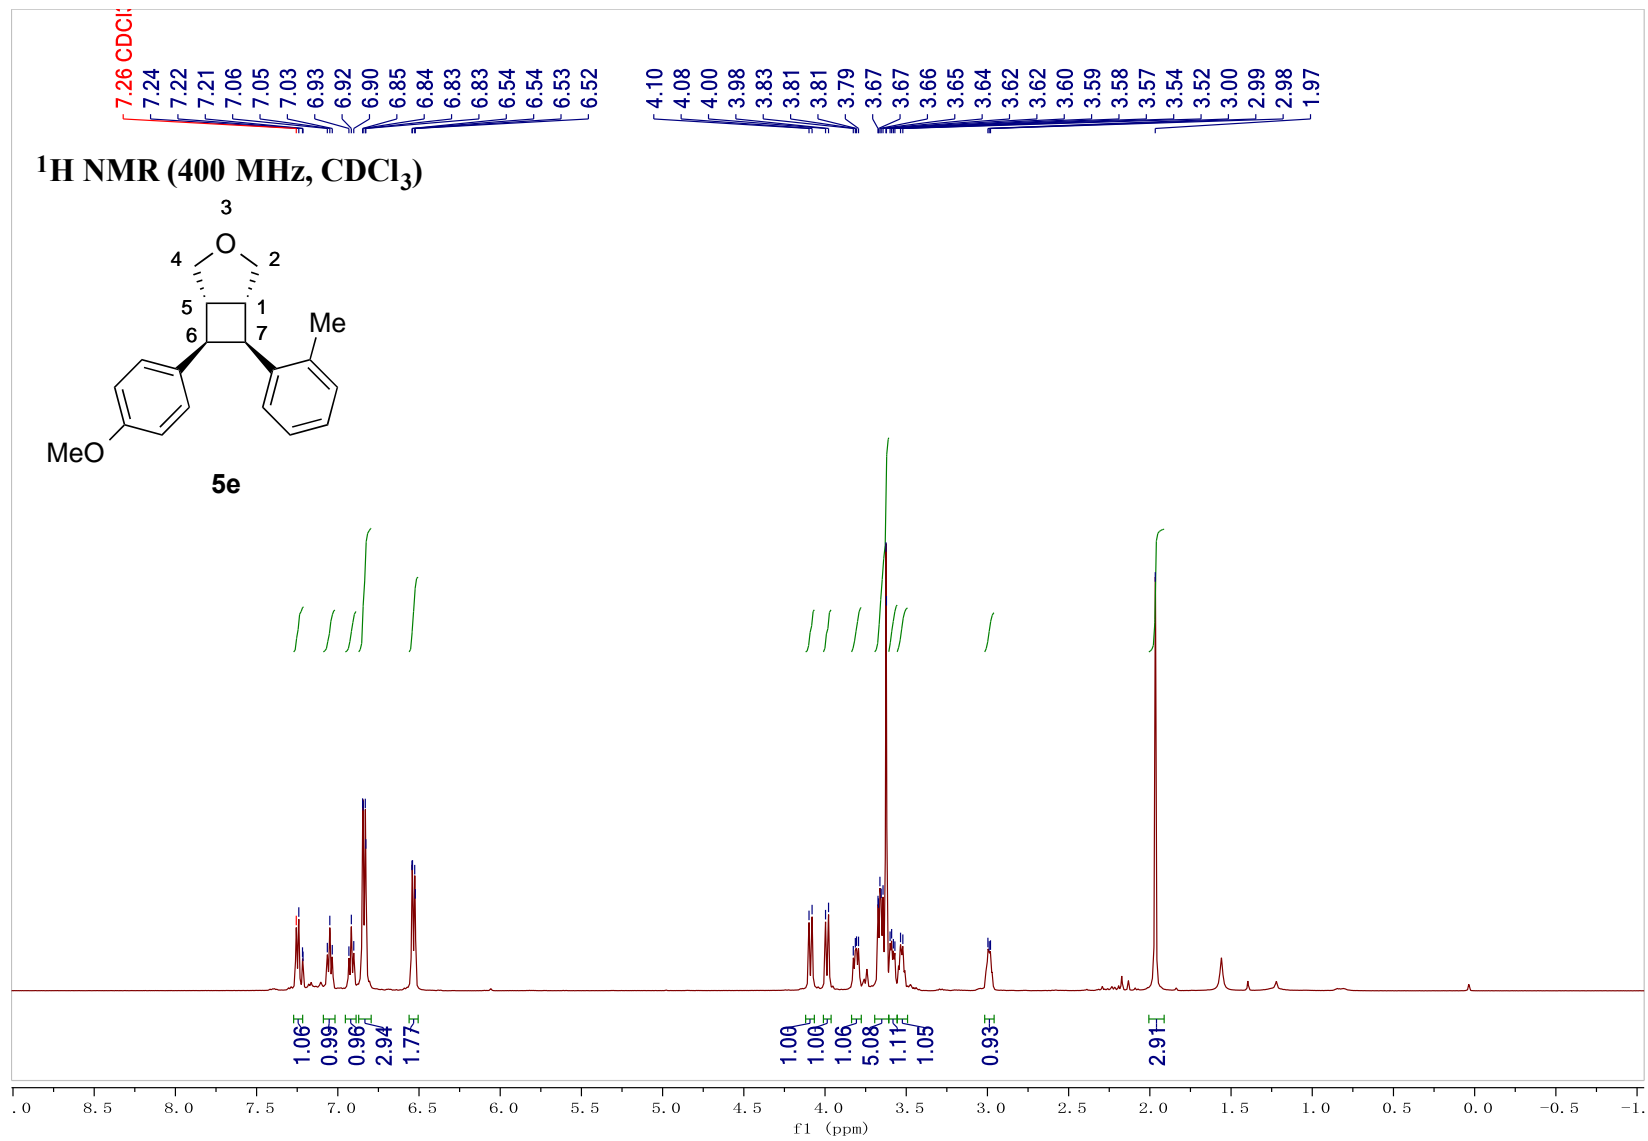

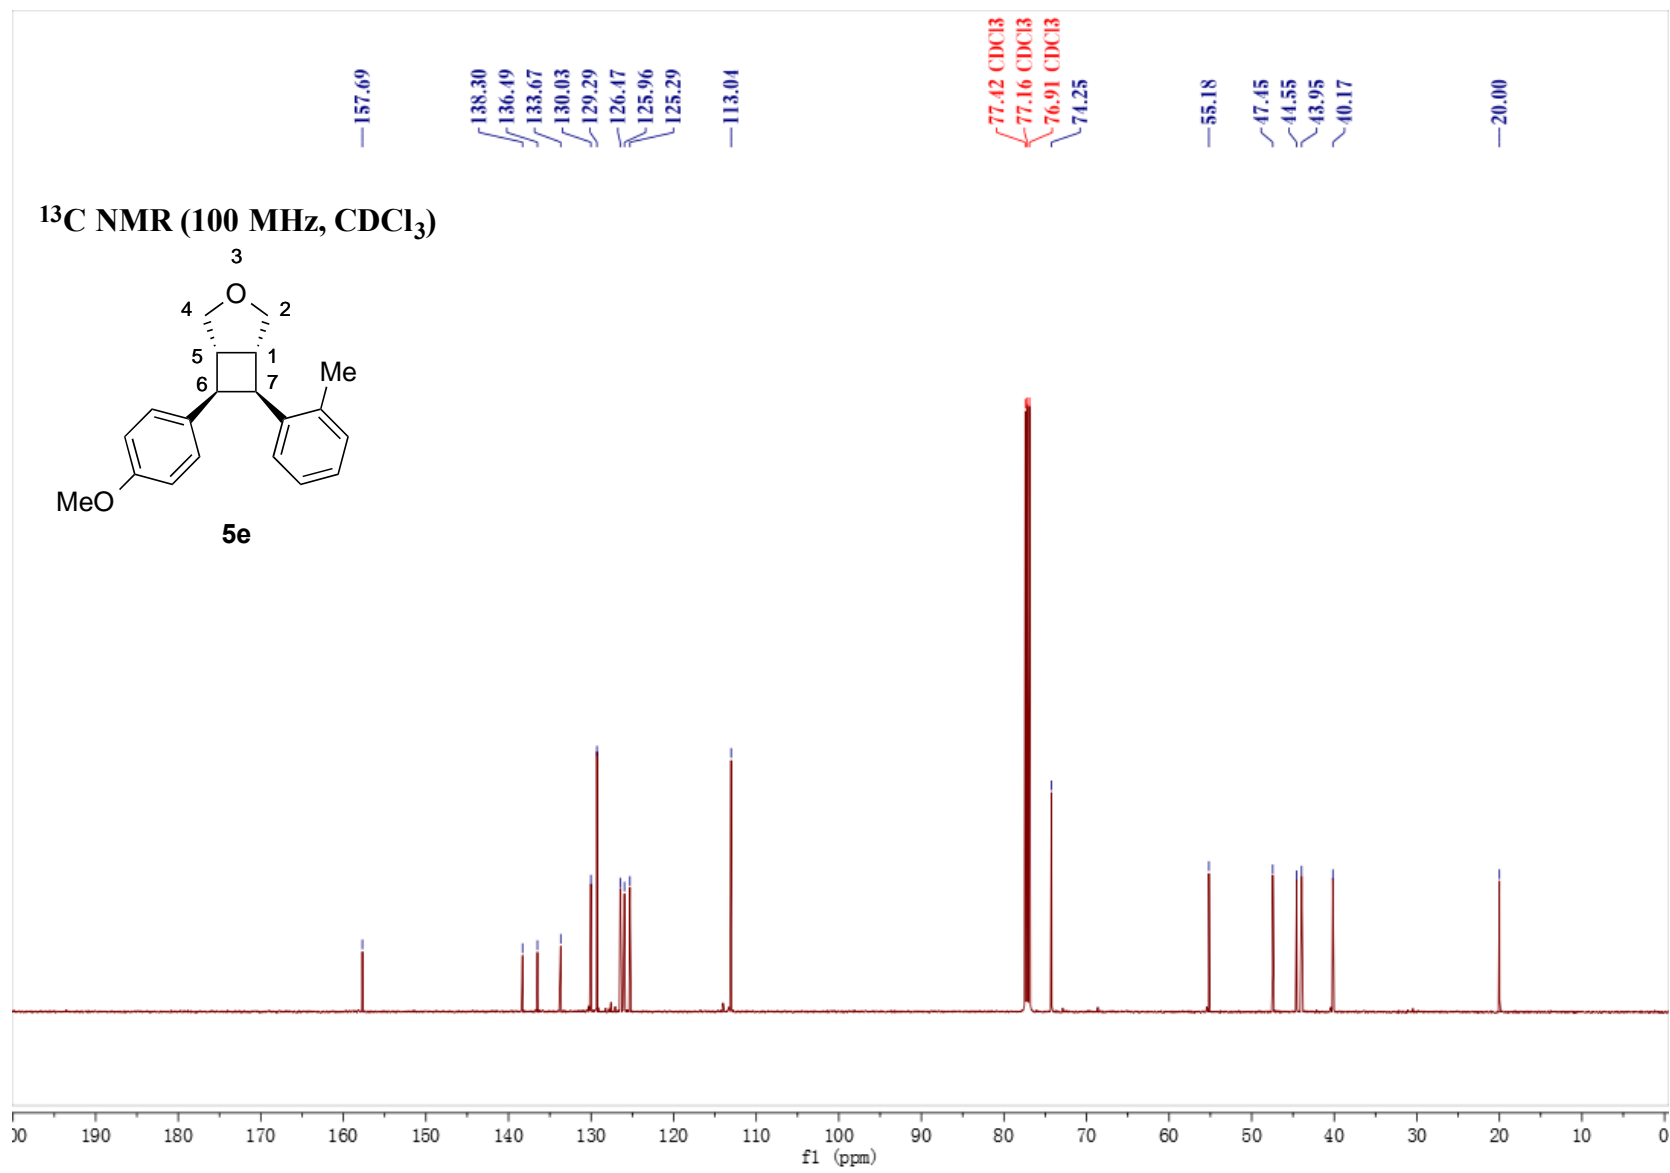

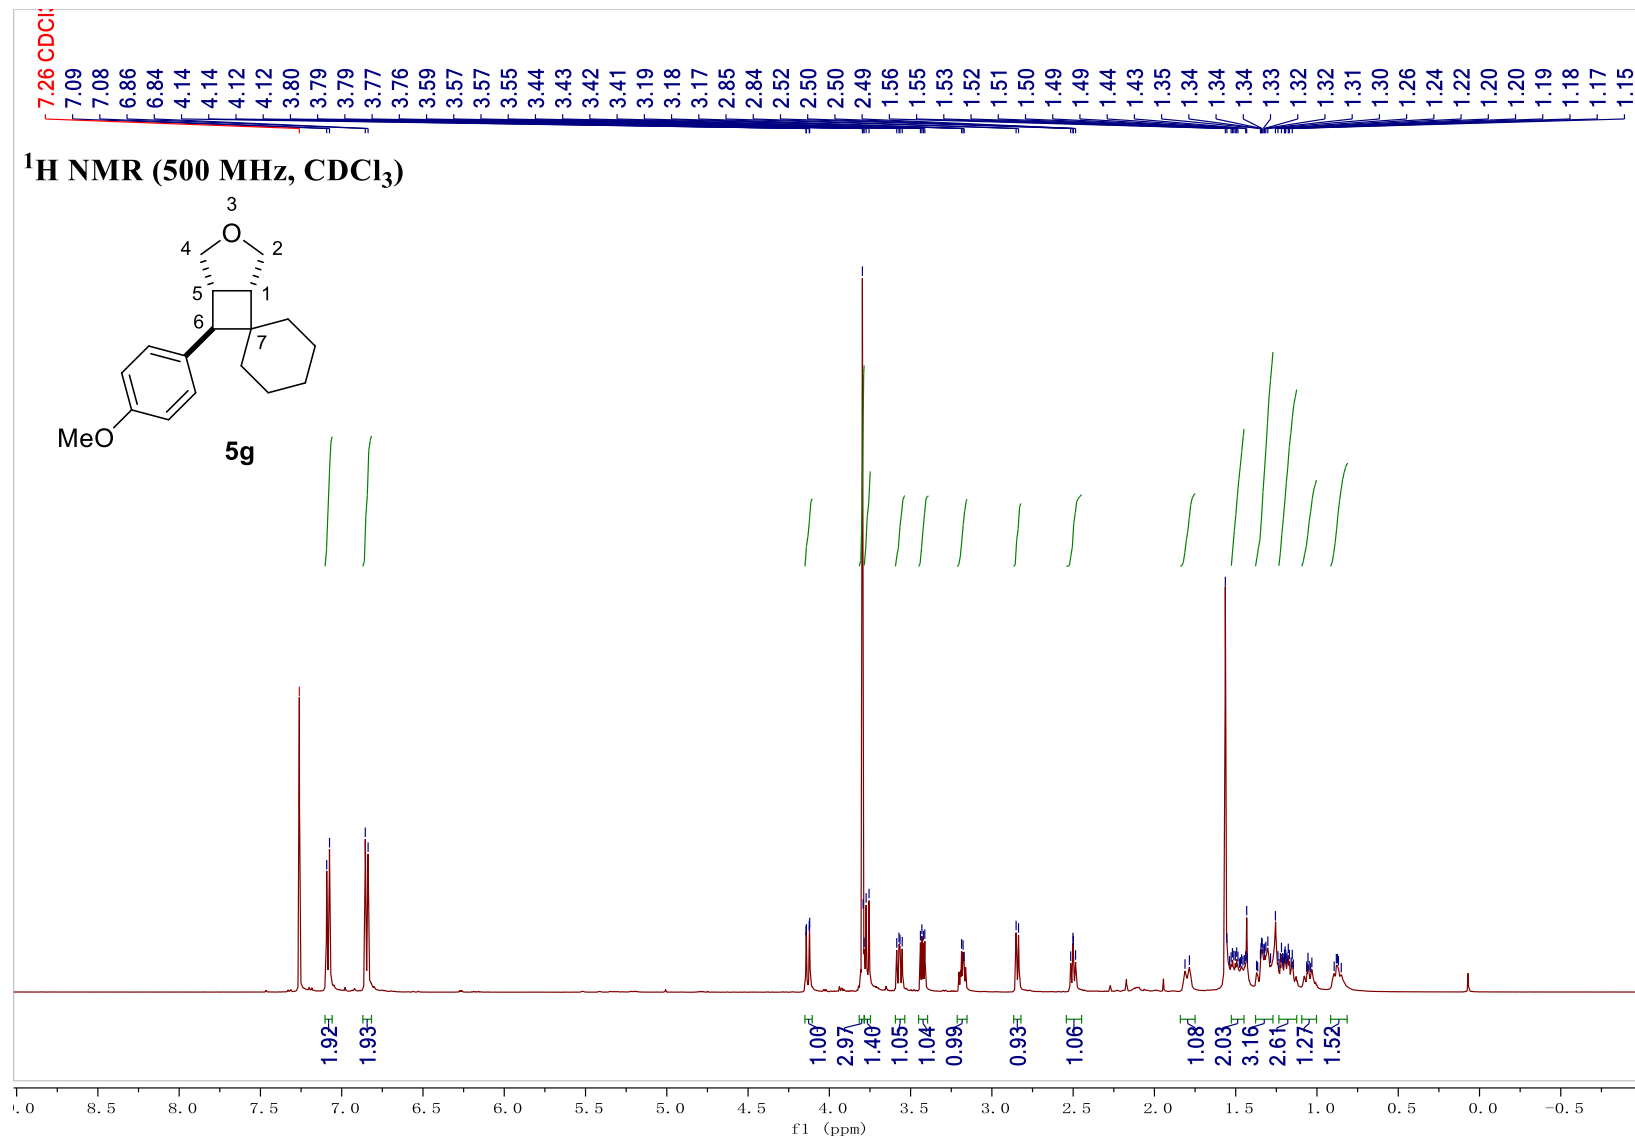

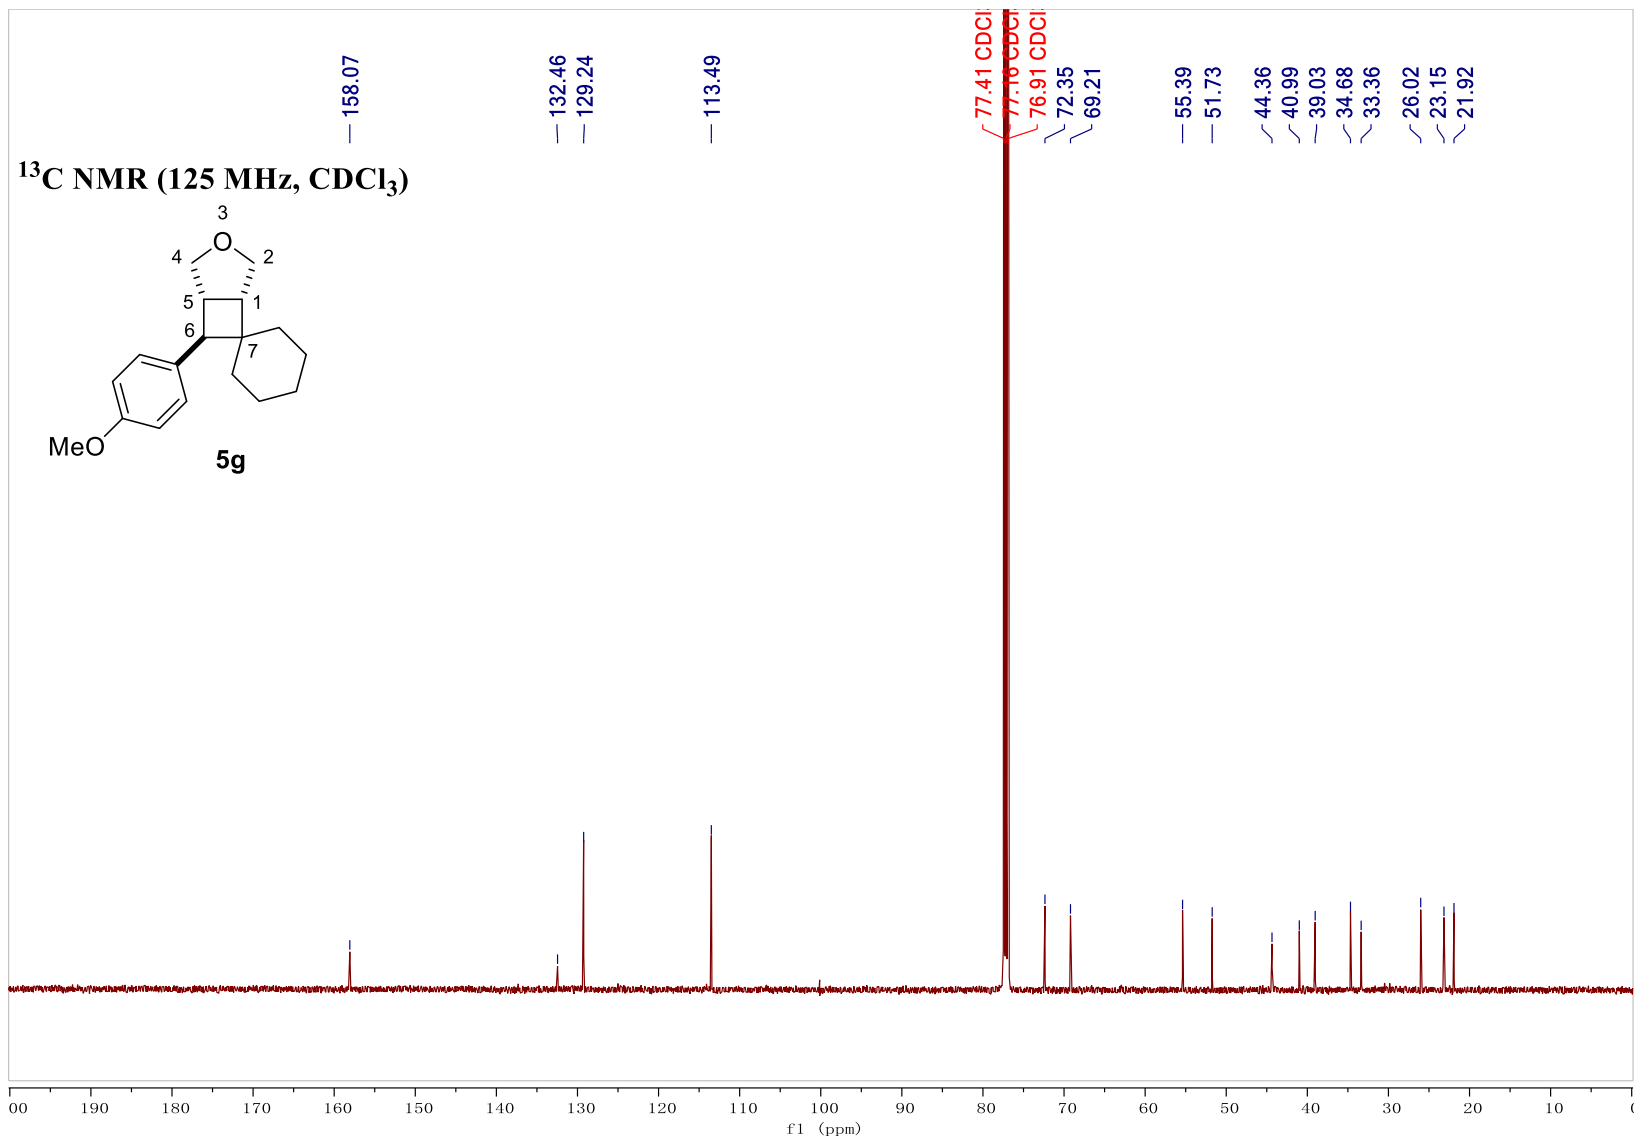

**$^1\text{H} - ^1\text{H}$  COSY - 90 (500 MHz,  $\text{CDCl}_3$ )**

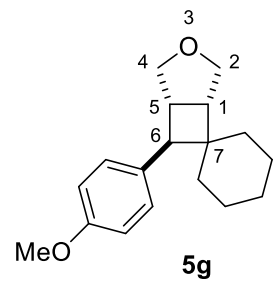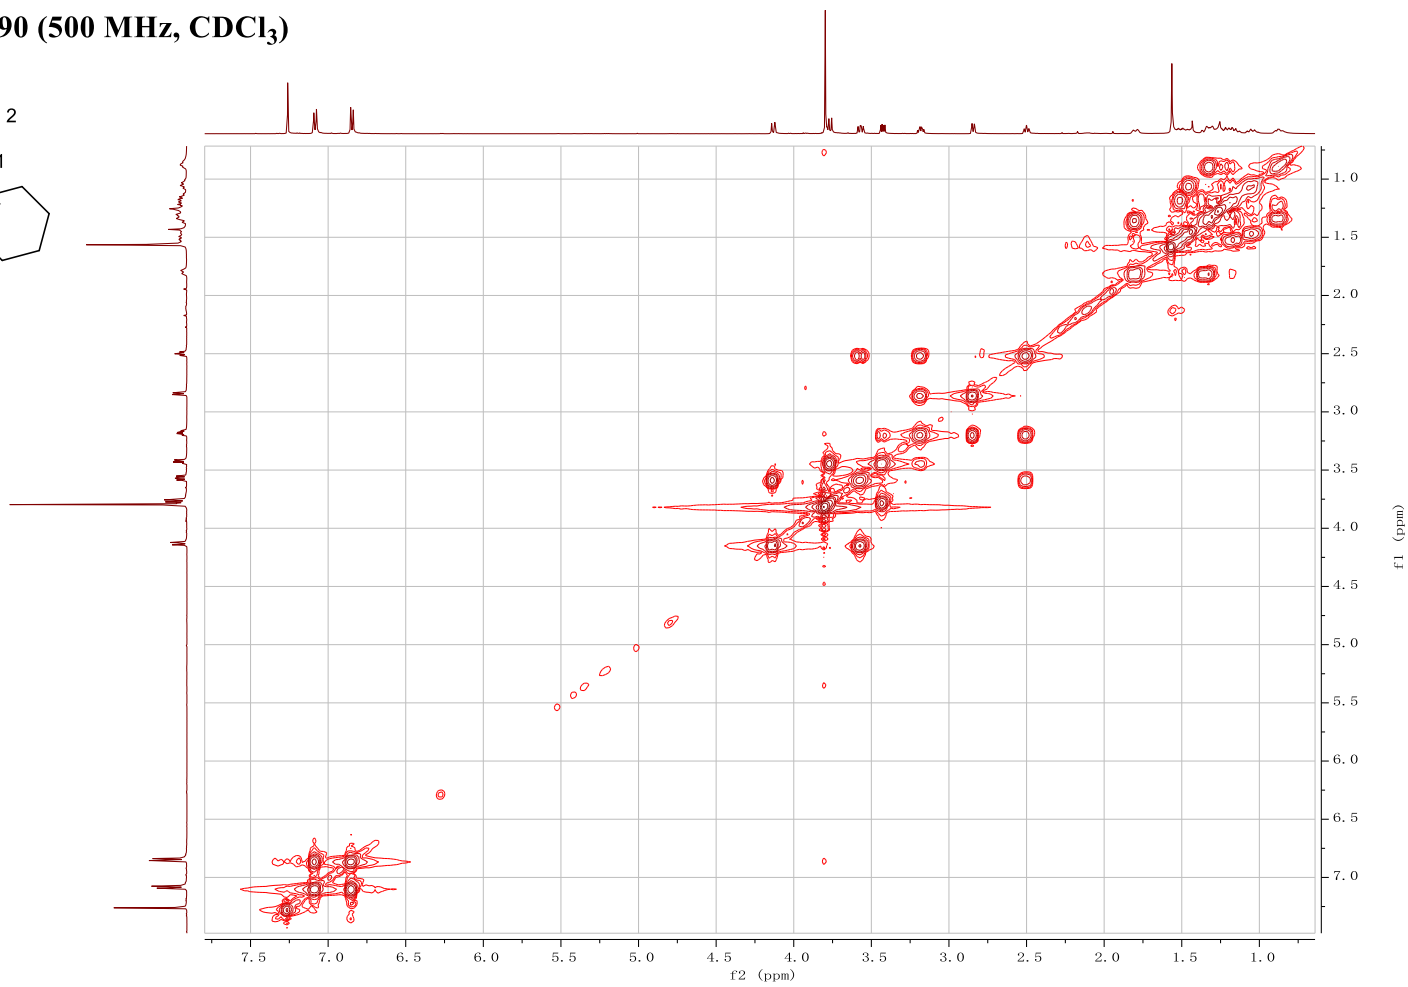

$^1\text{H}$  (500 MHz) -  $^{13}\text{C}$  (125 MHz) HSQC ( $\text{CDCl}_3$ )

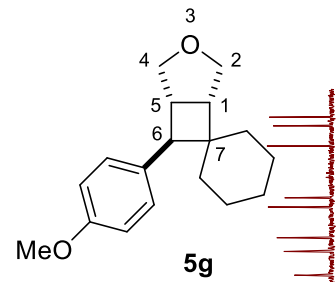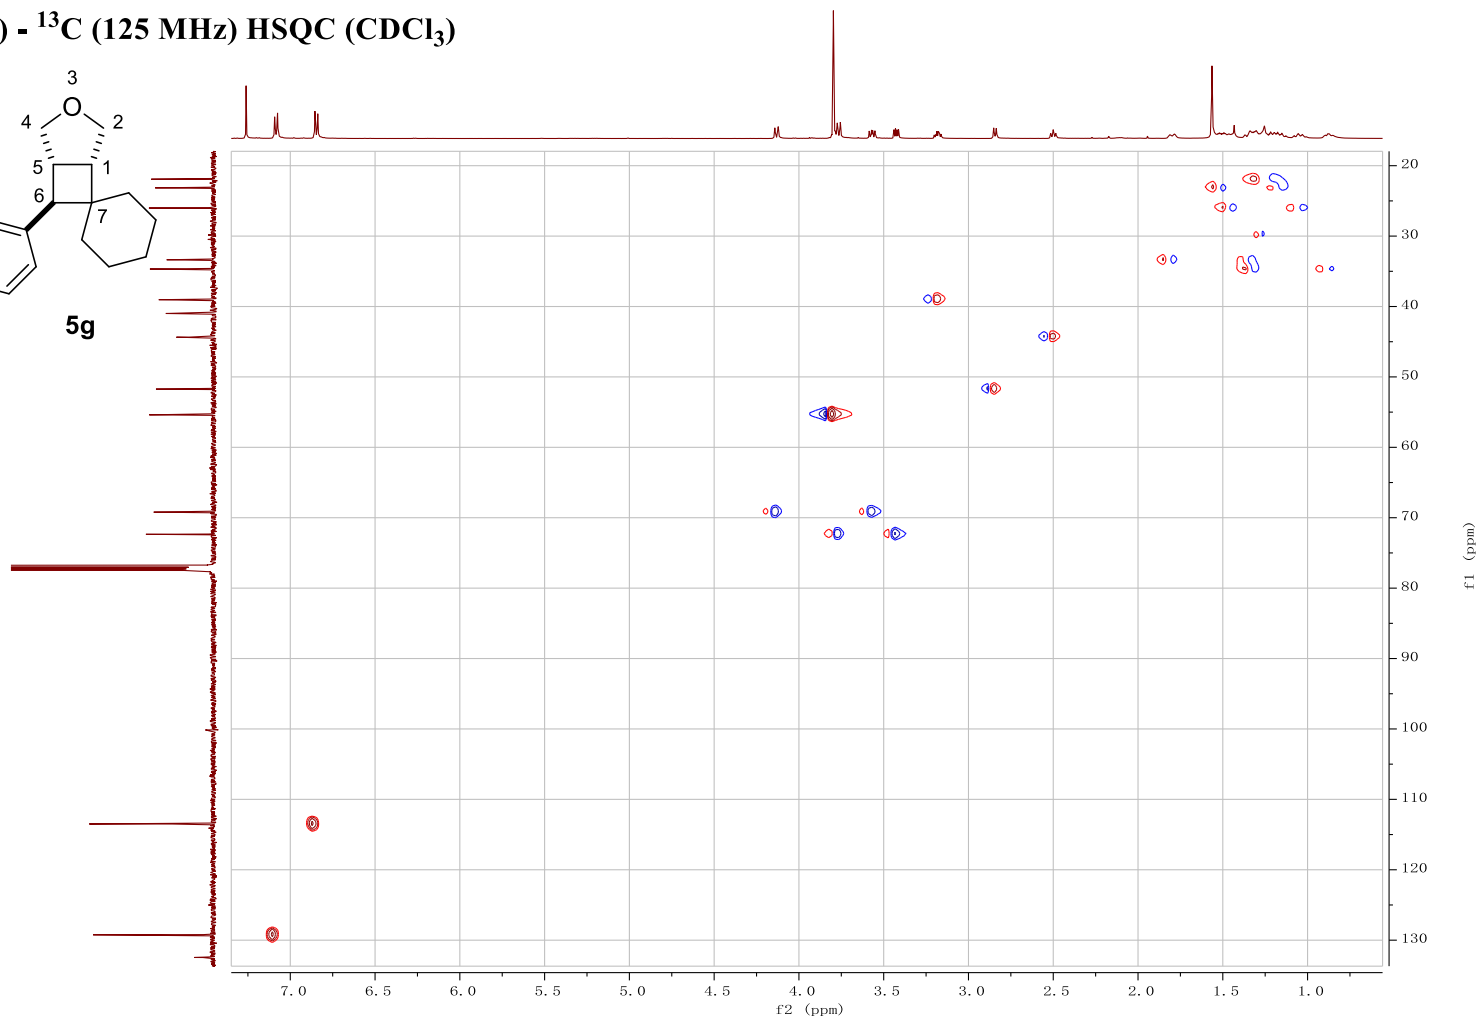

NOESY-2D (500 MHz, CDCl<sub>3</sub>)

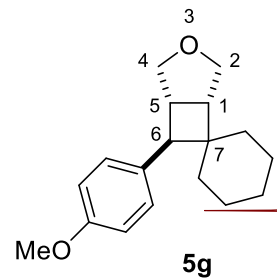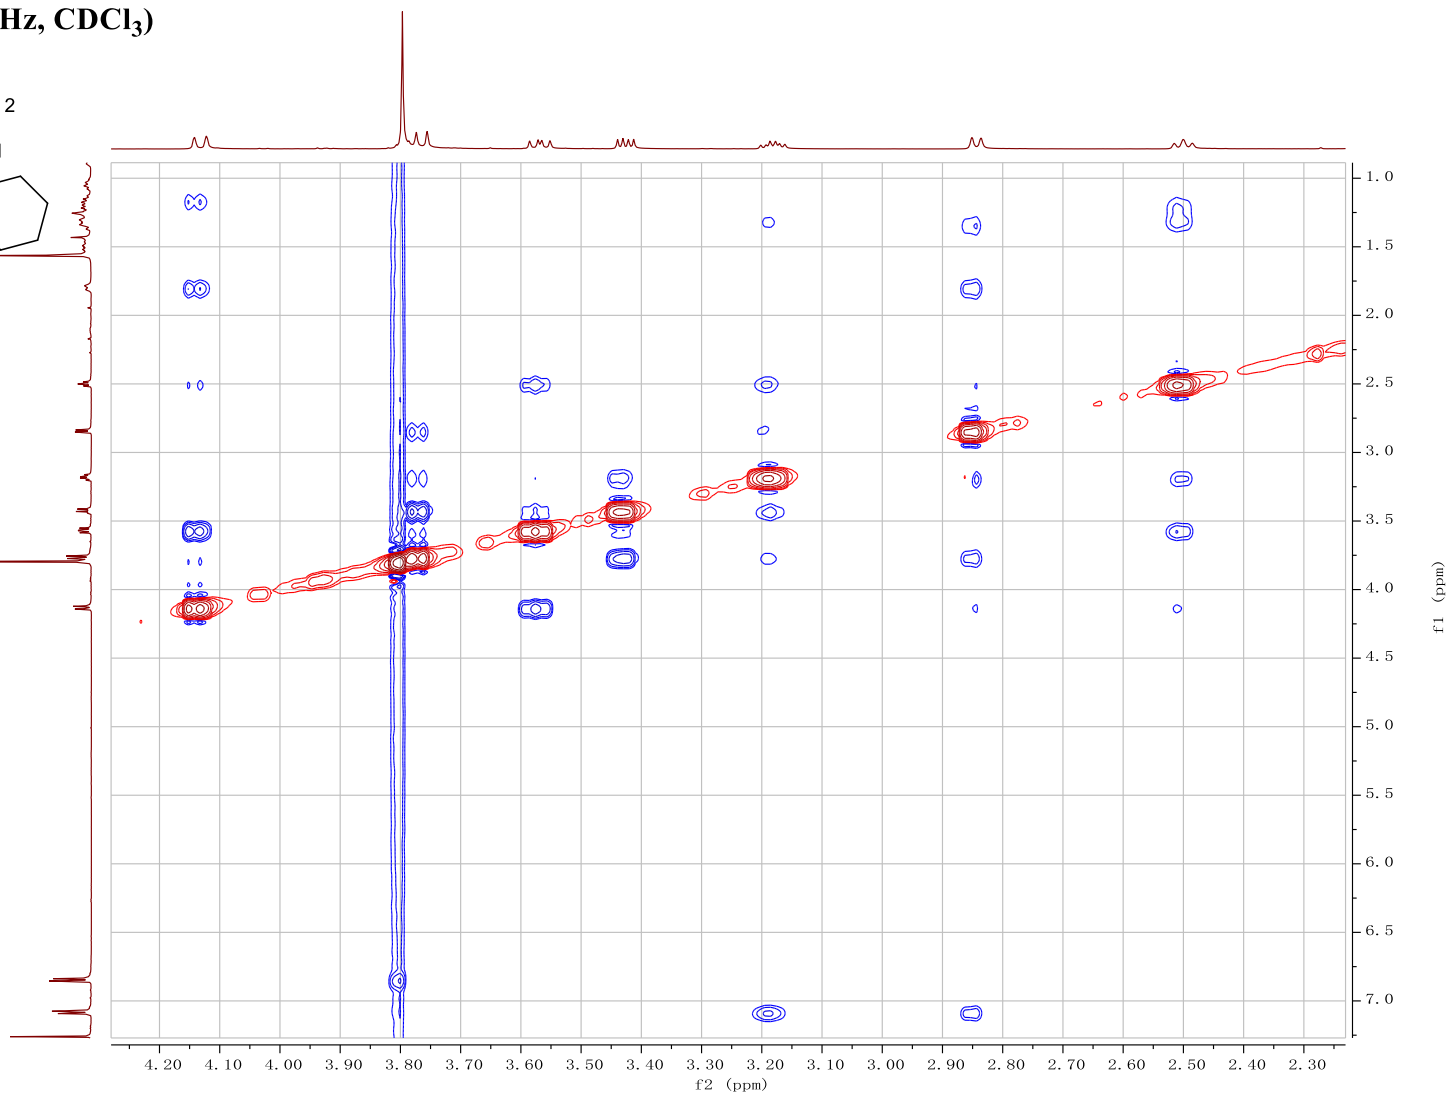



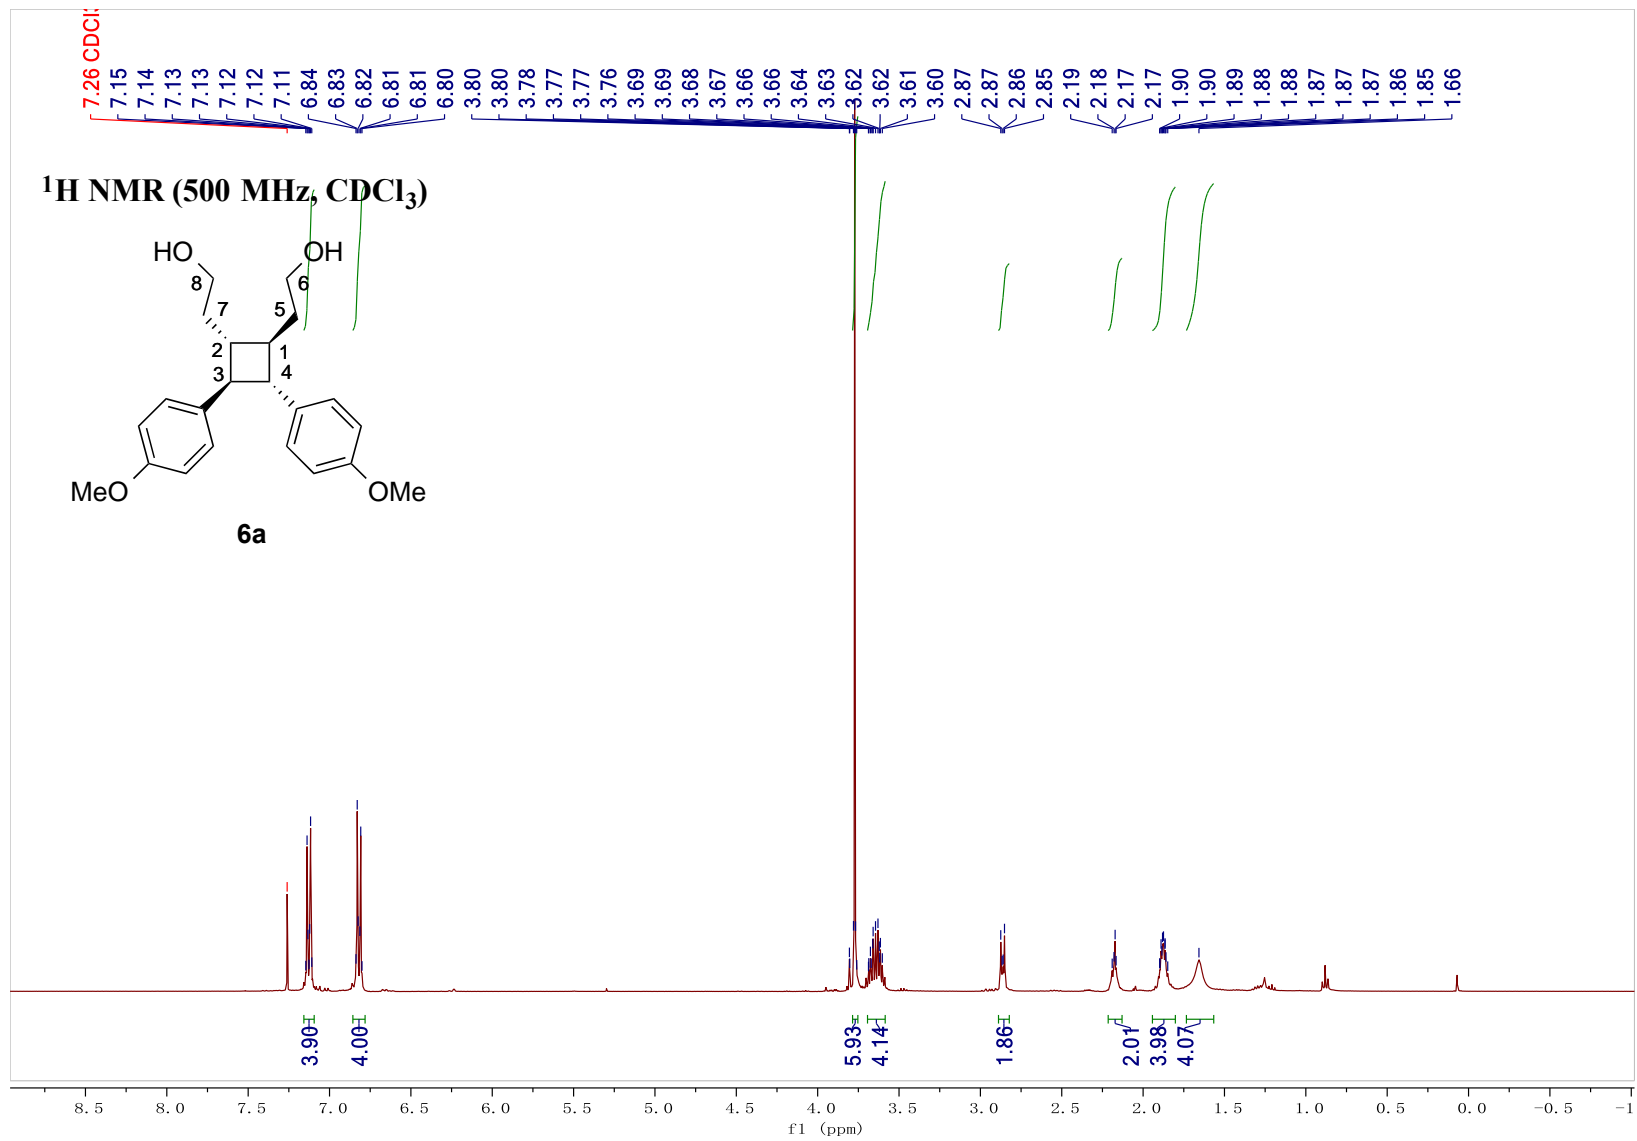

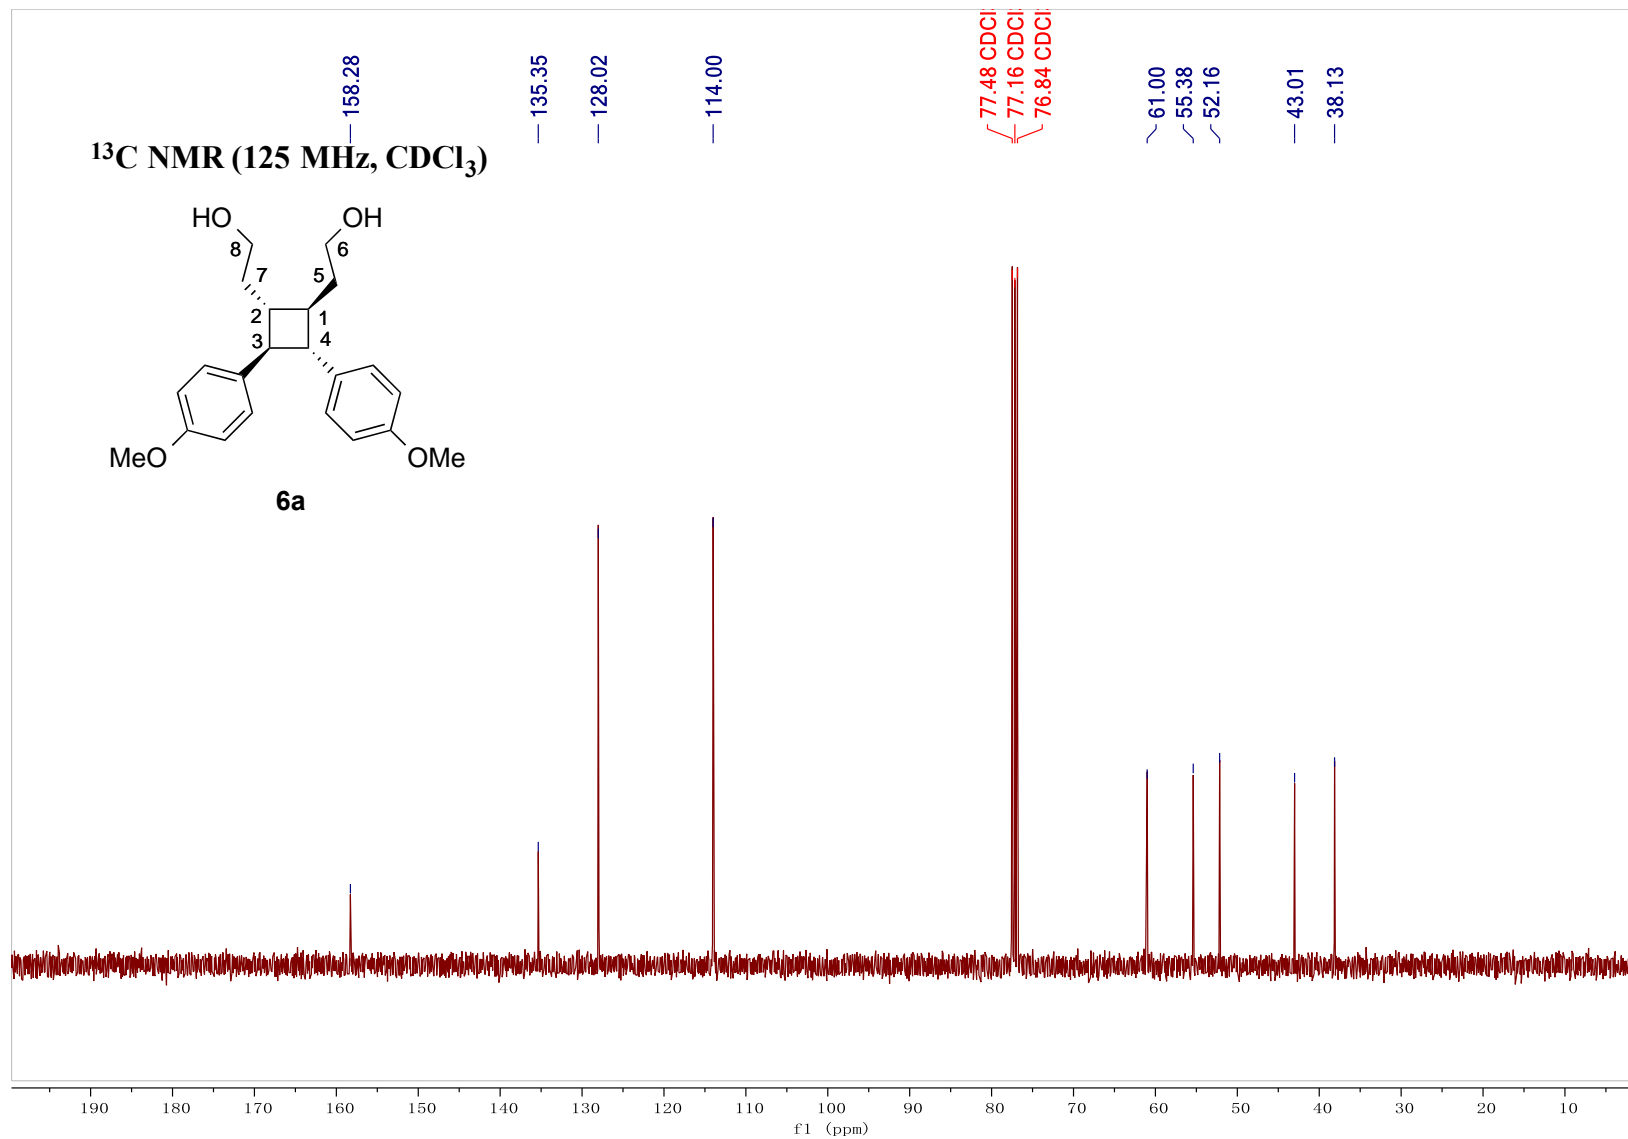

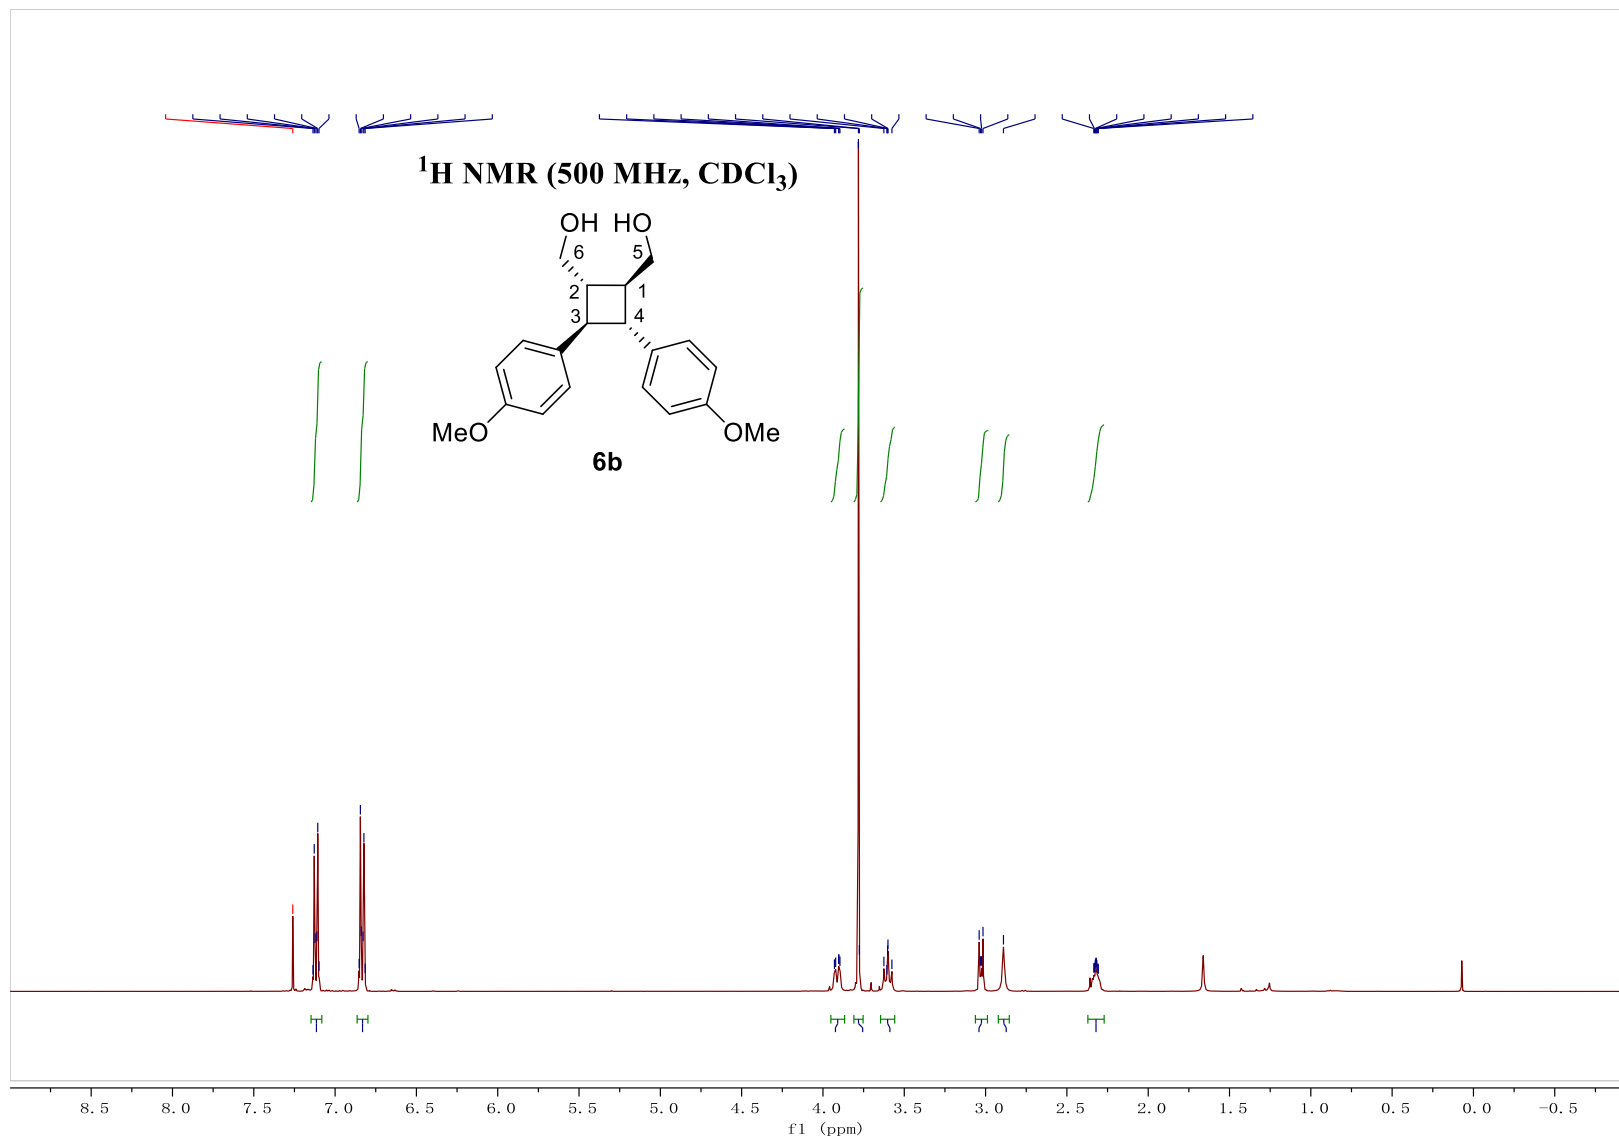

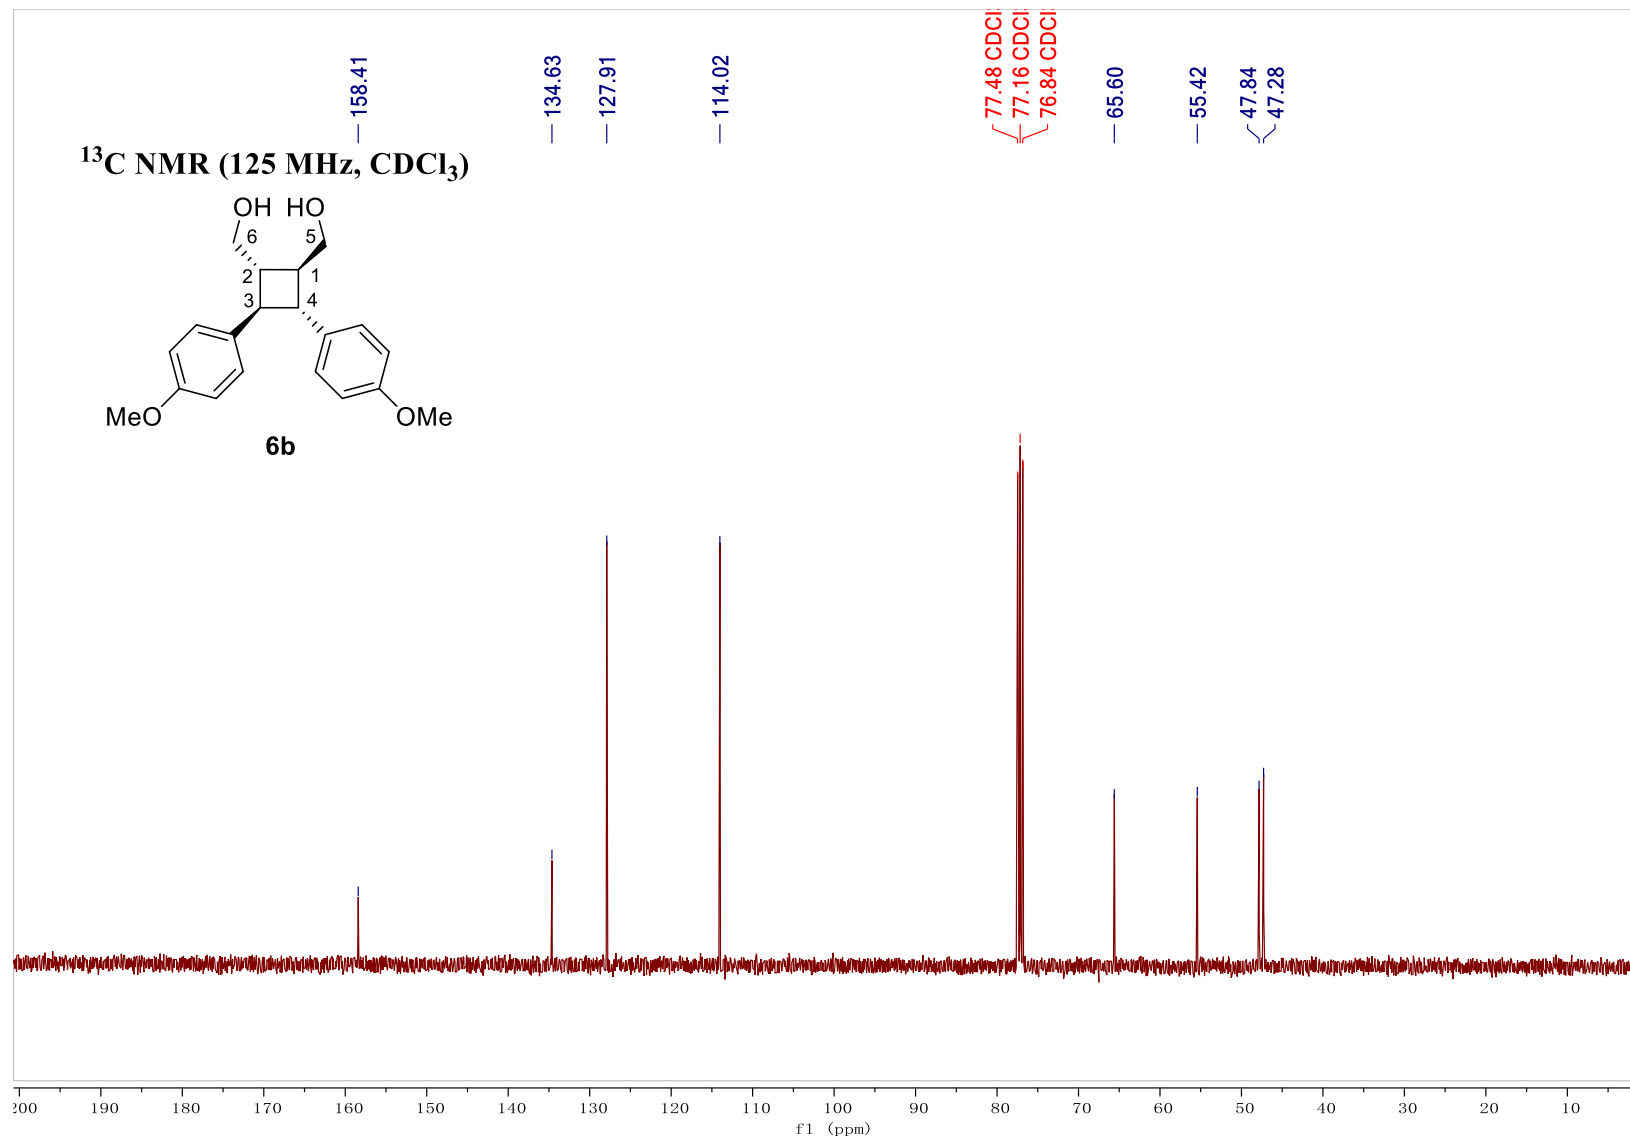

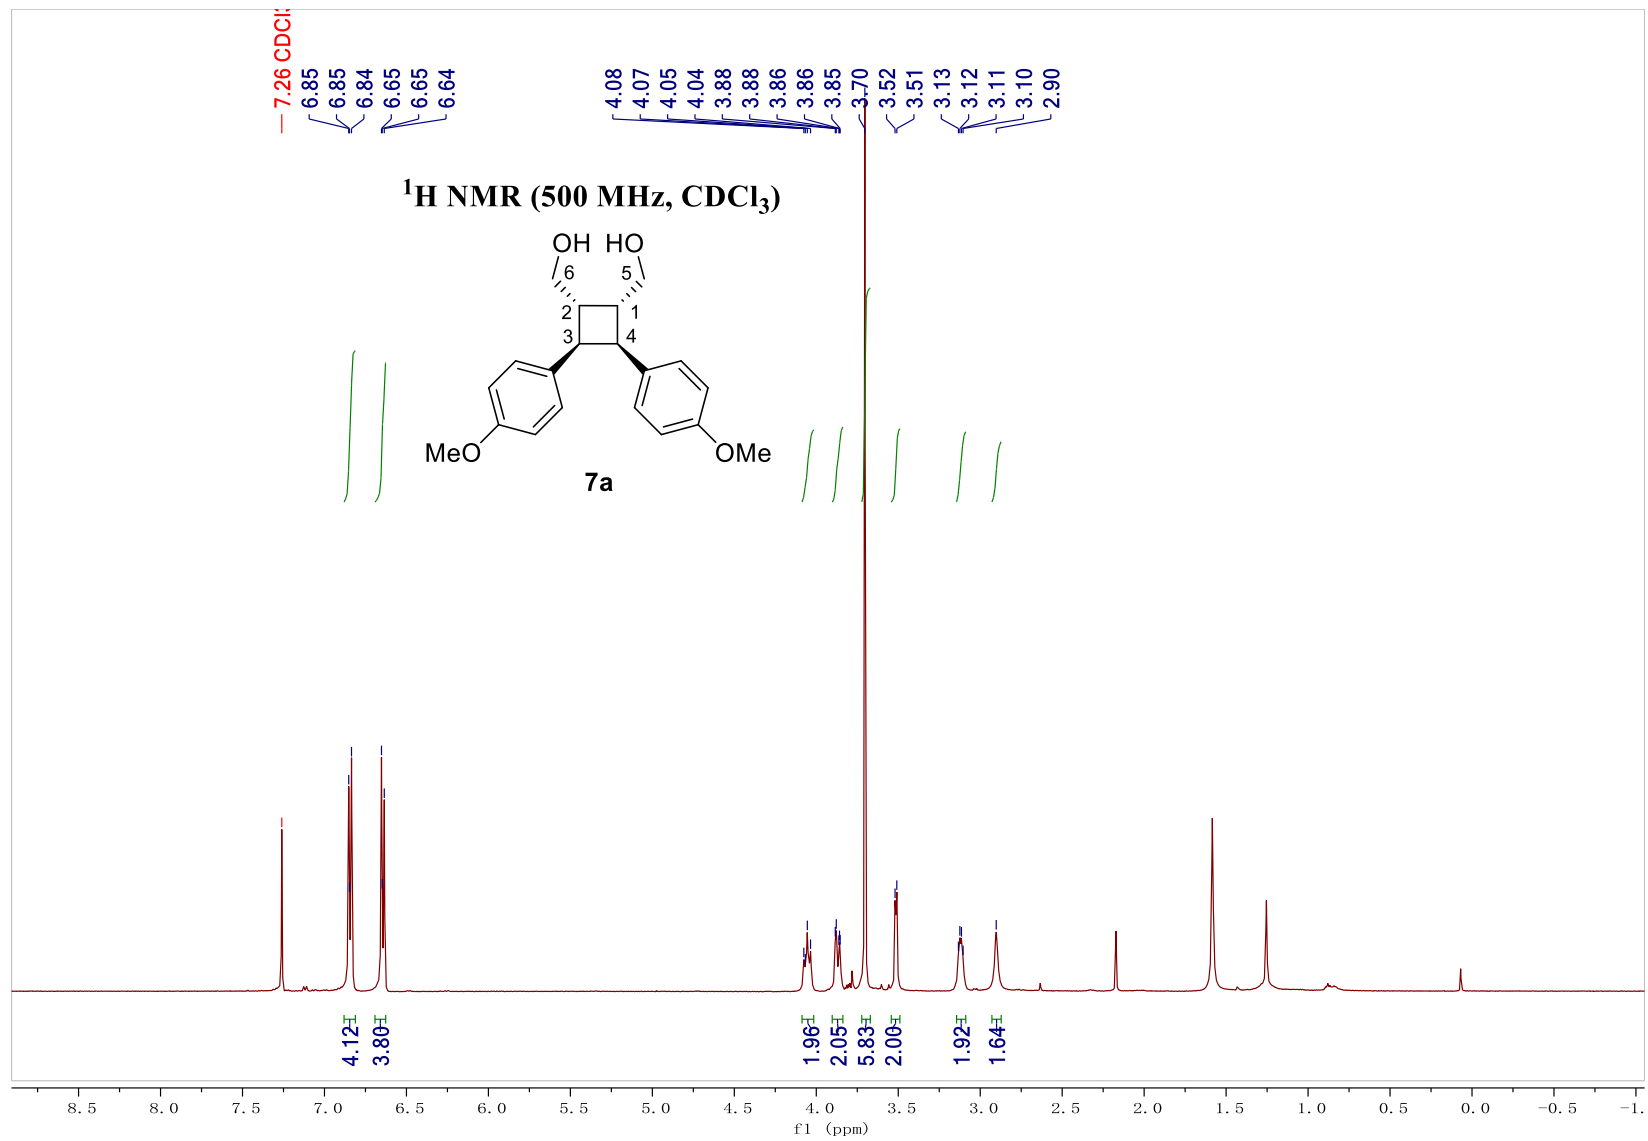

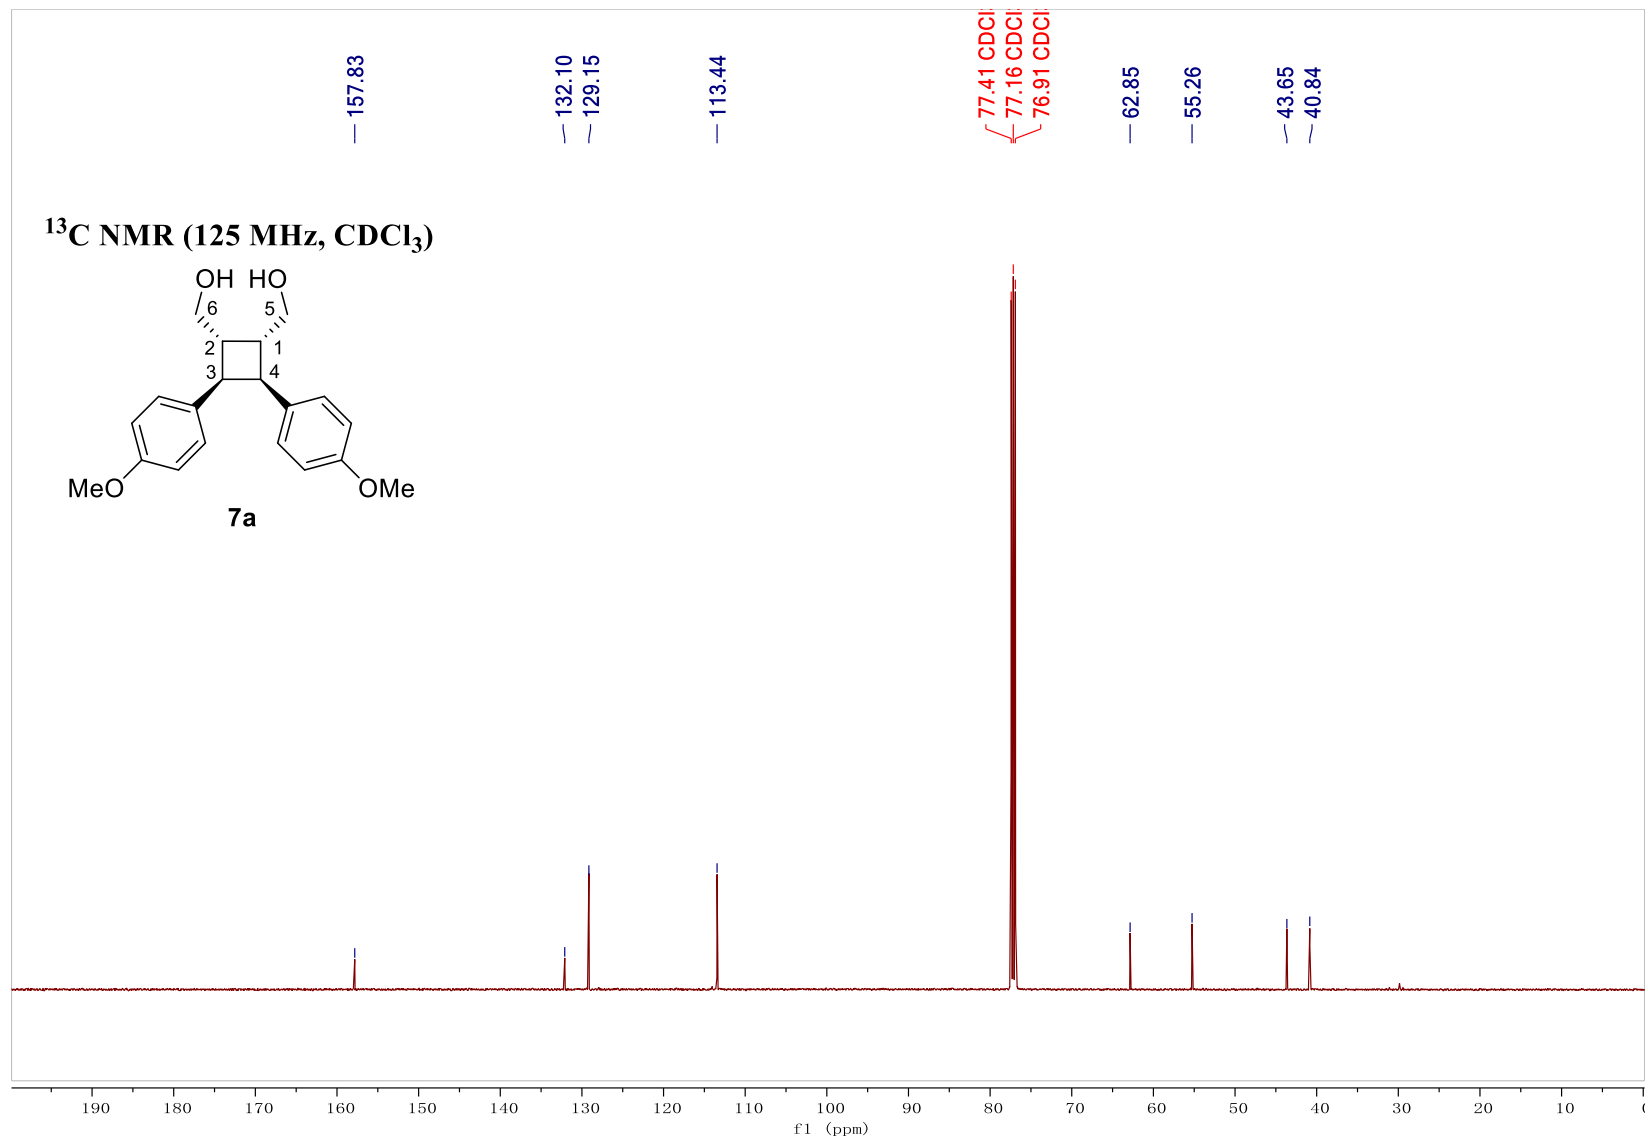

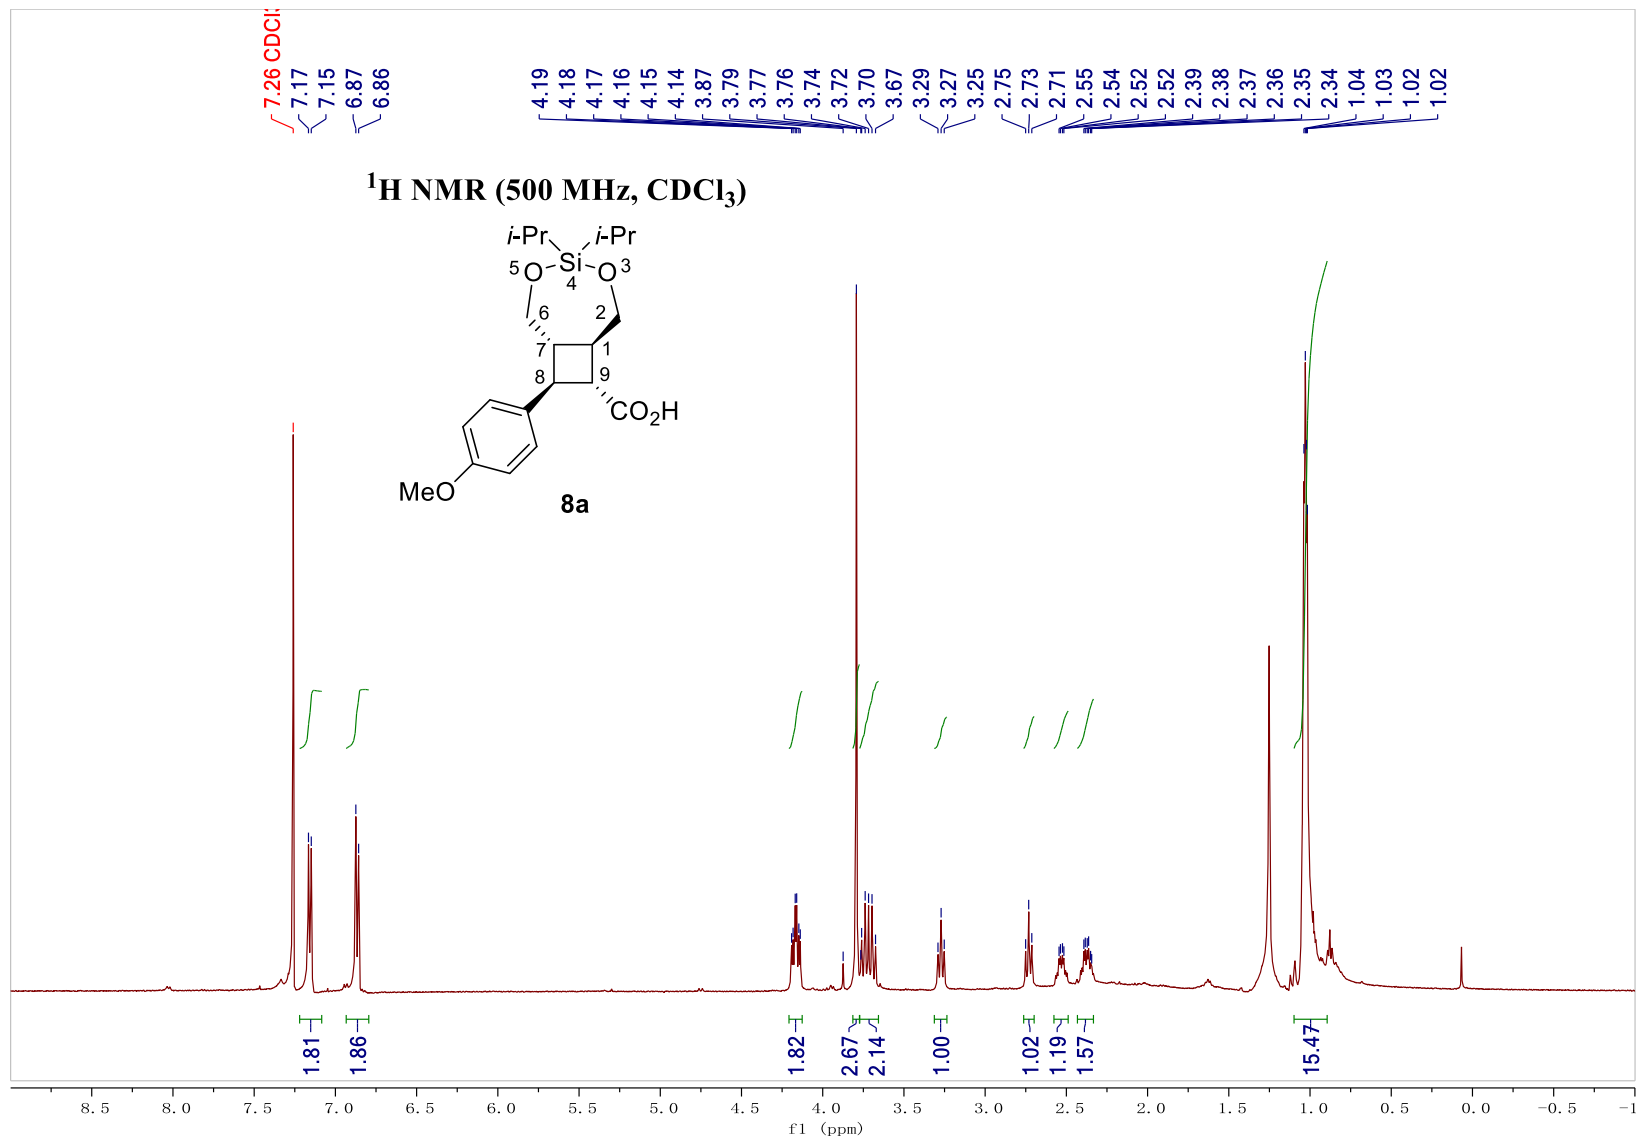

**$^{13}\text{C}$  NMR (125 MHz,  $\text{CDCl}_3$ )**

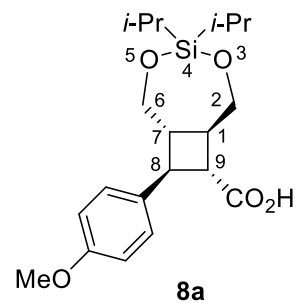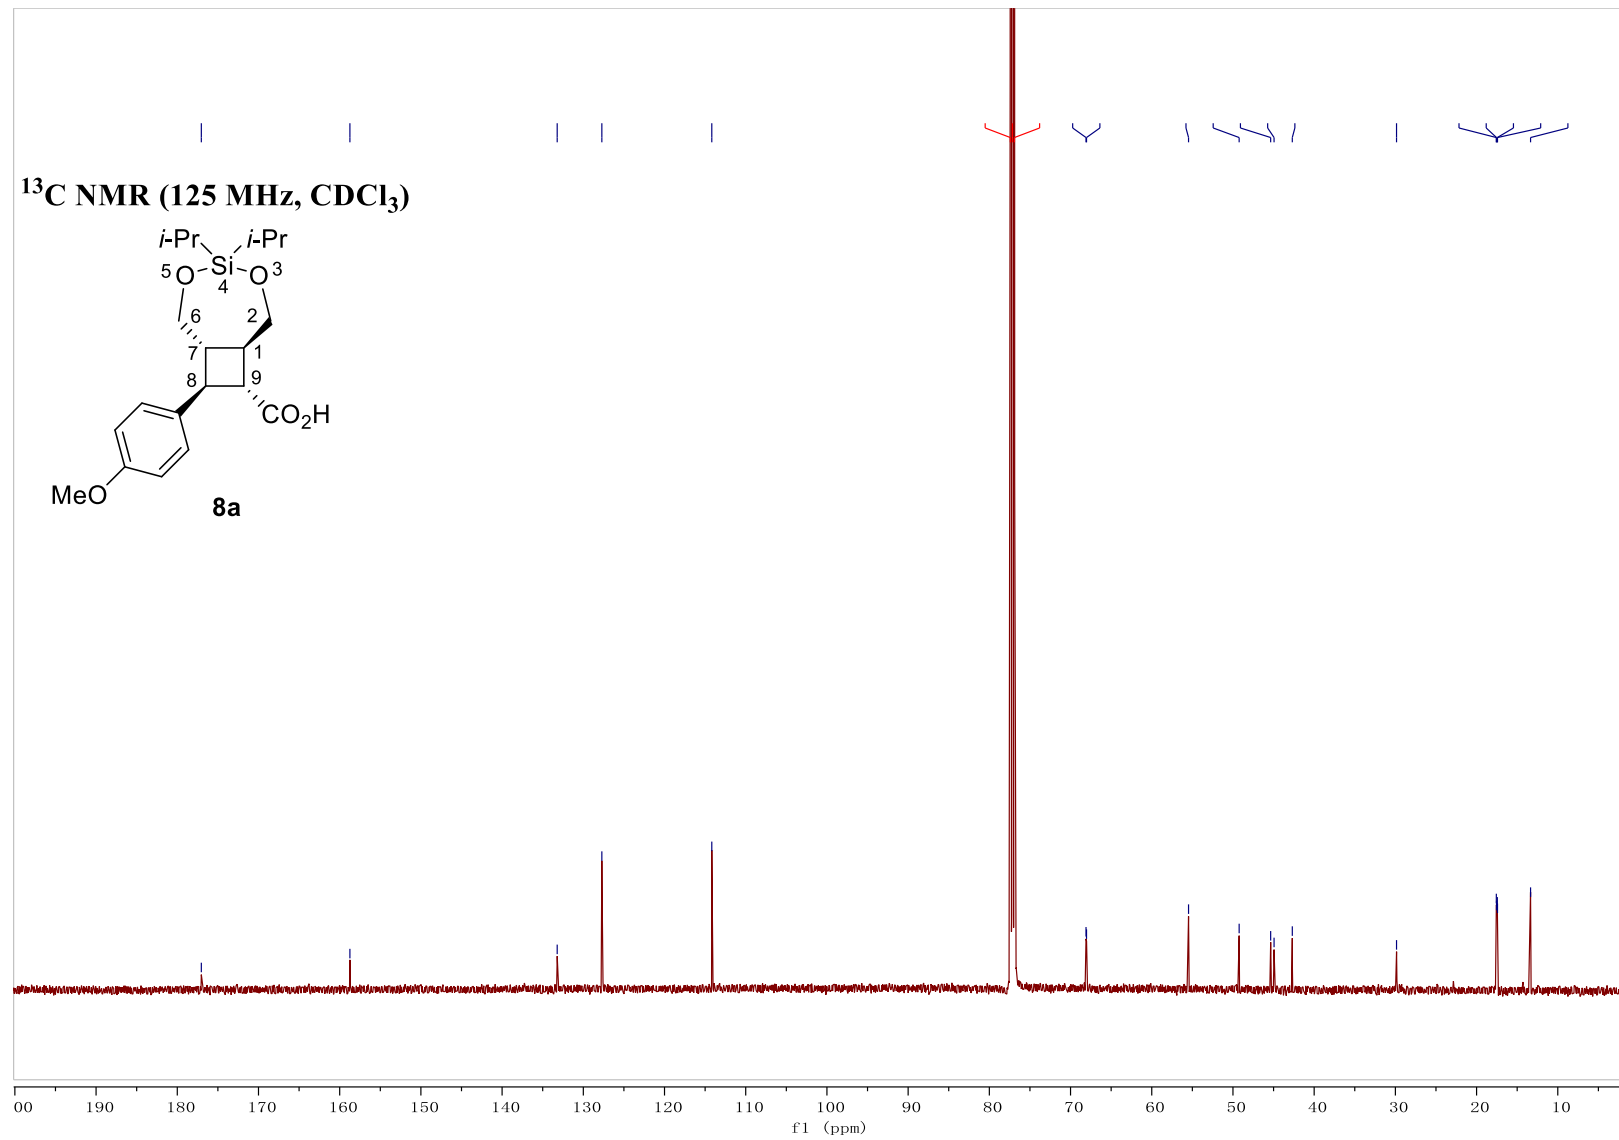



**$^1\text{H} - ^1\text{H}$  COSY - 90 (500 MHz,  $\text{CDCl}_3$ )**

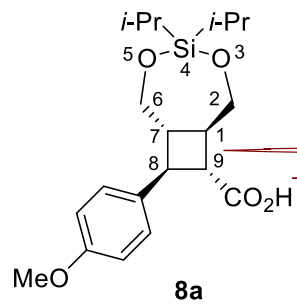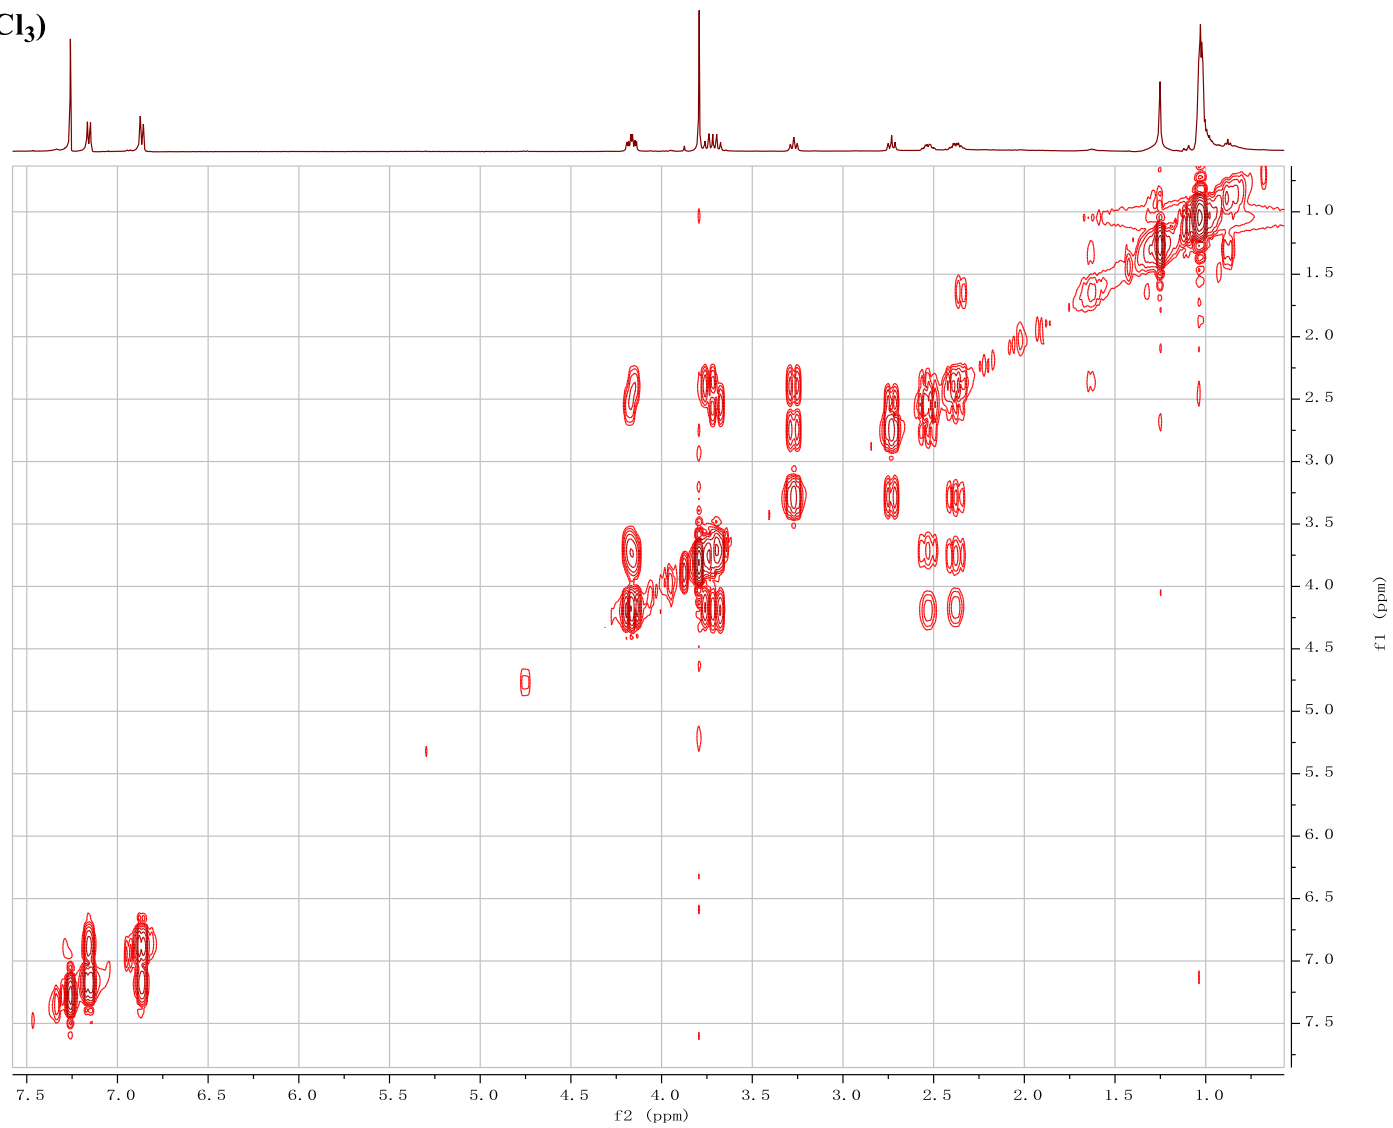

$^1\text{H}$  (500 MHz) -  $^{13}\text{C}$  (125 MHz) HSQC ( $\text{CDCl}_3$ )

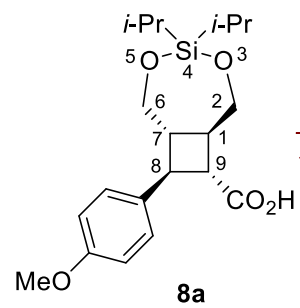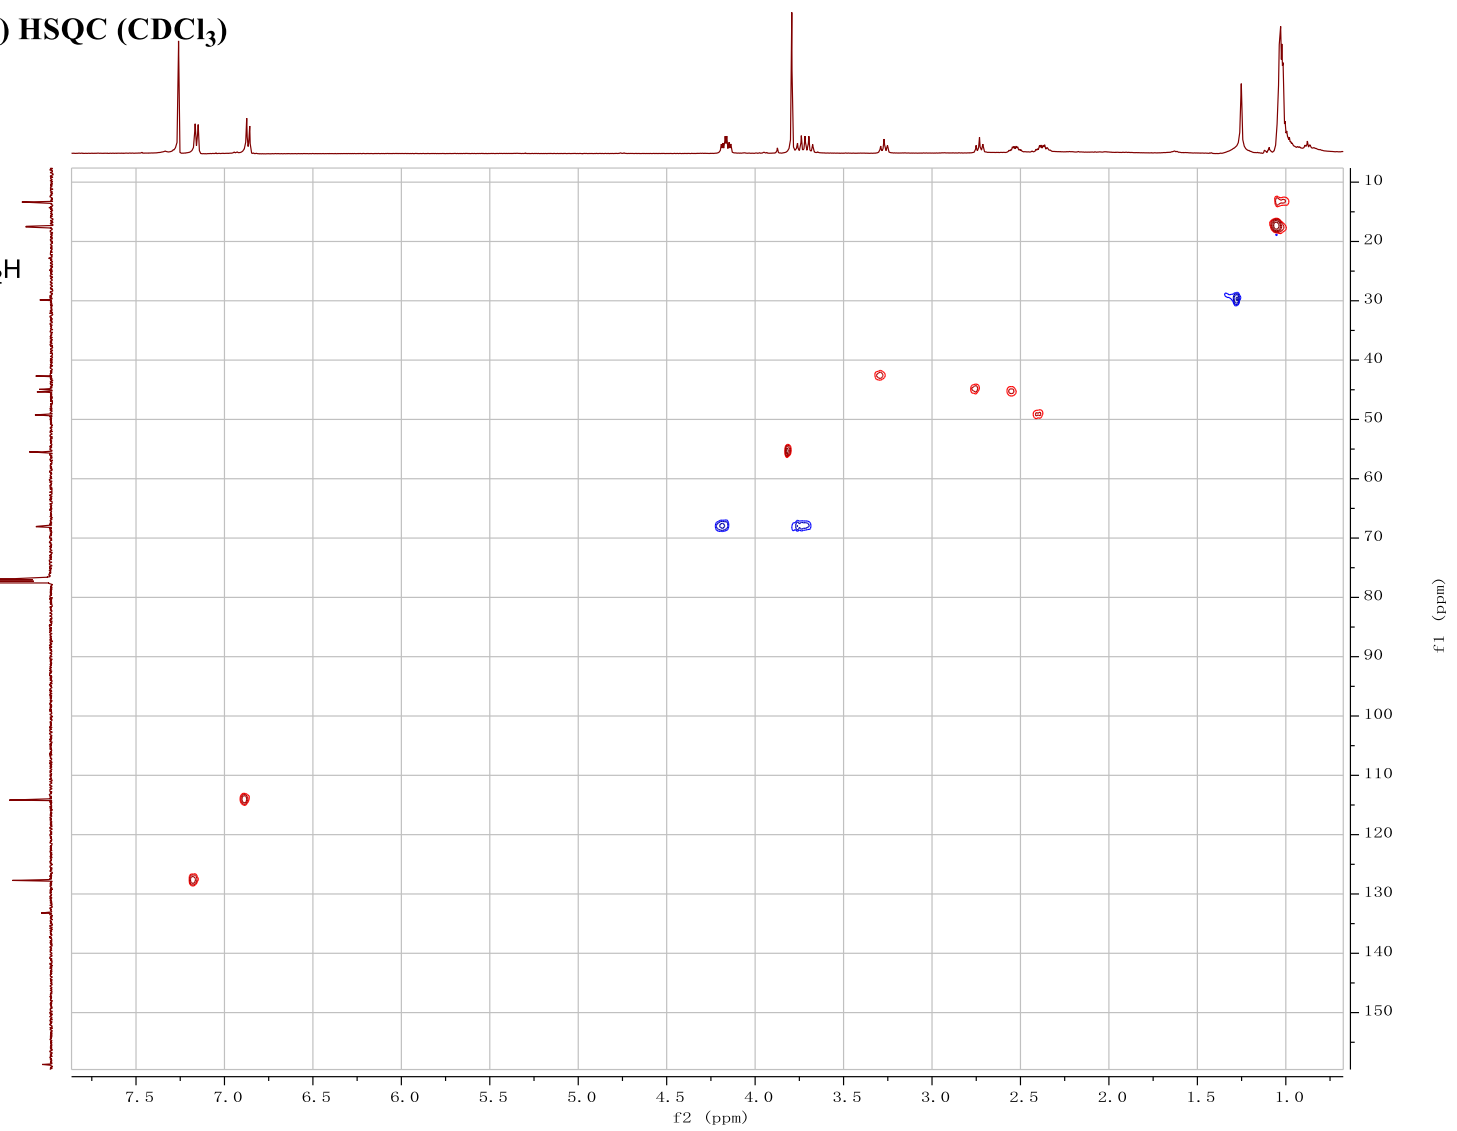

NOESY-2D (500 MHz, CDCl<sub>3</sub>)

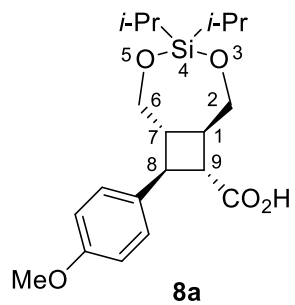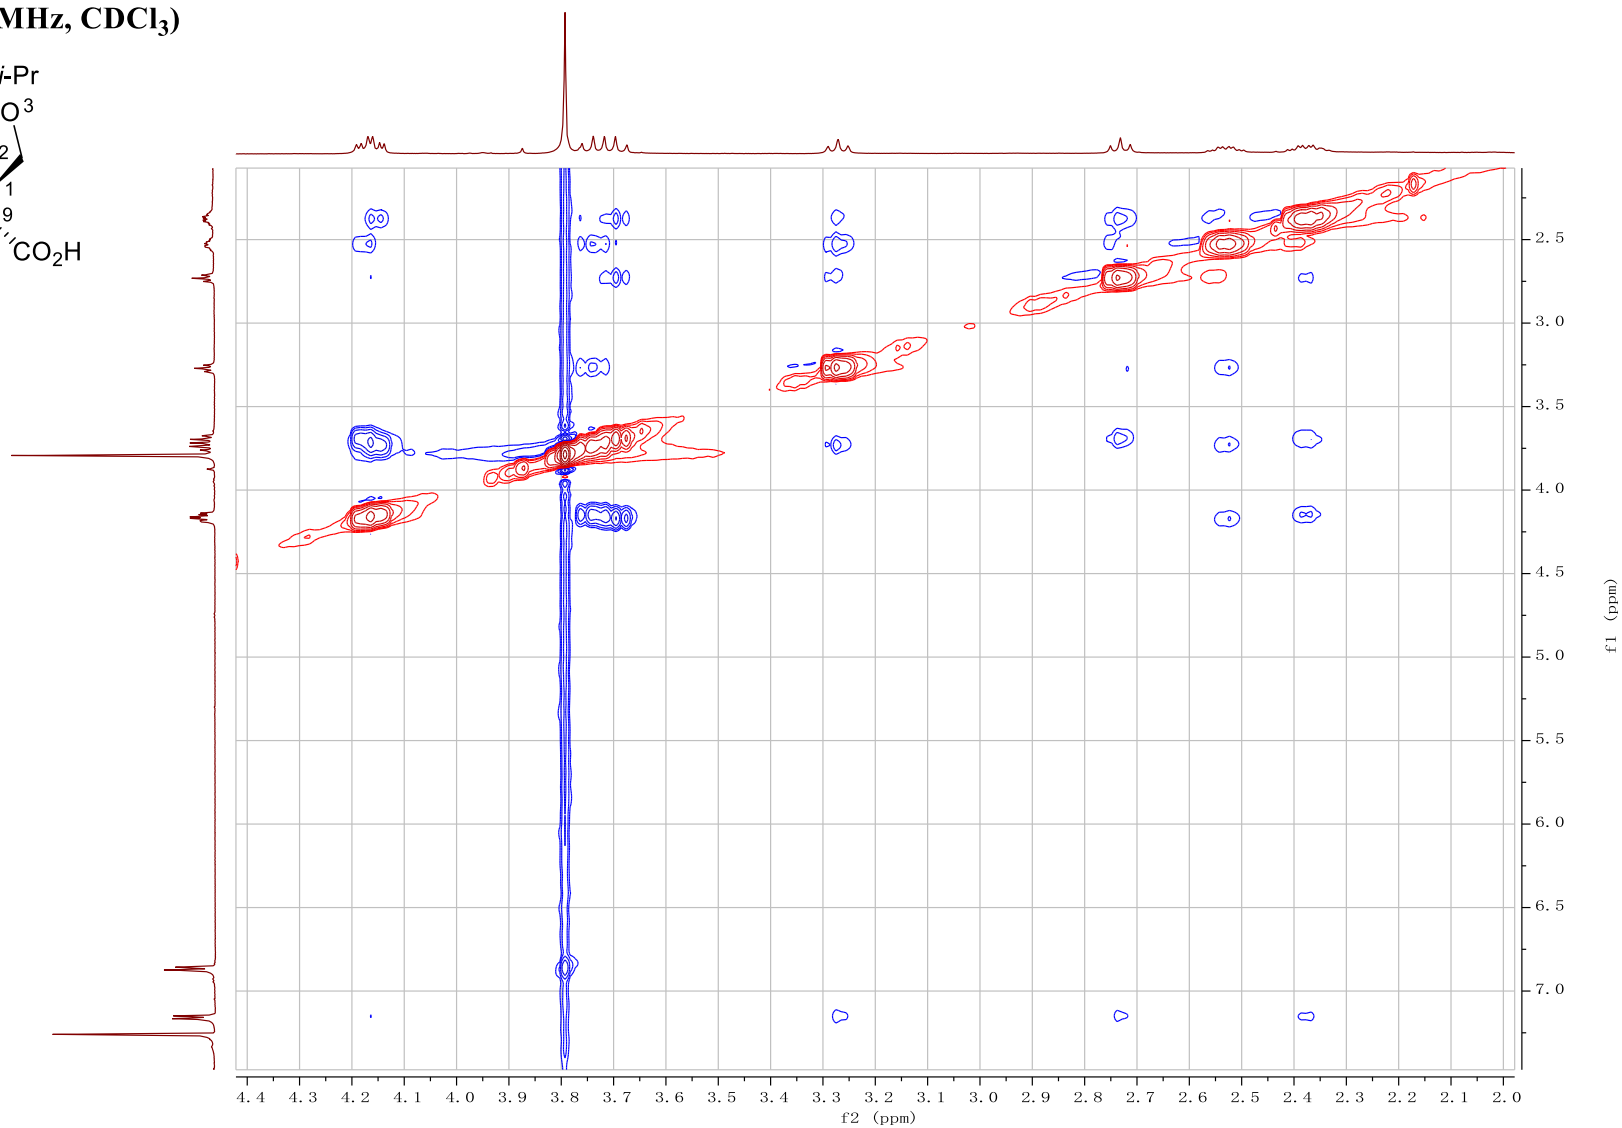

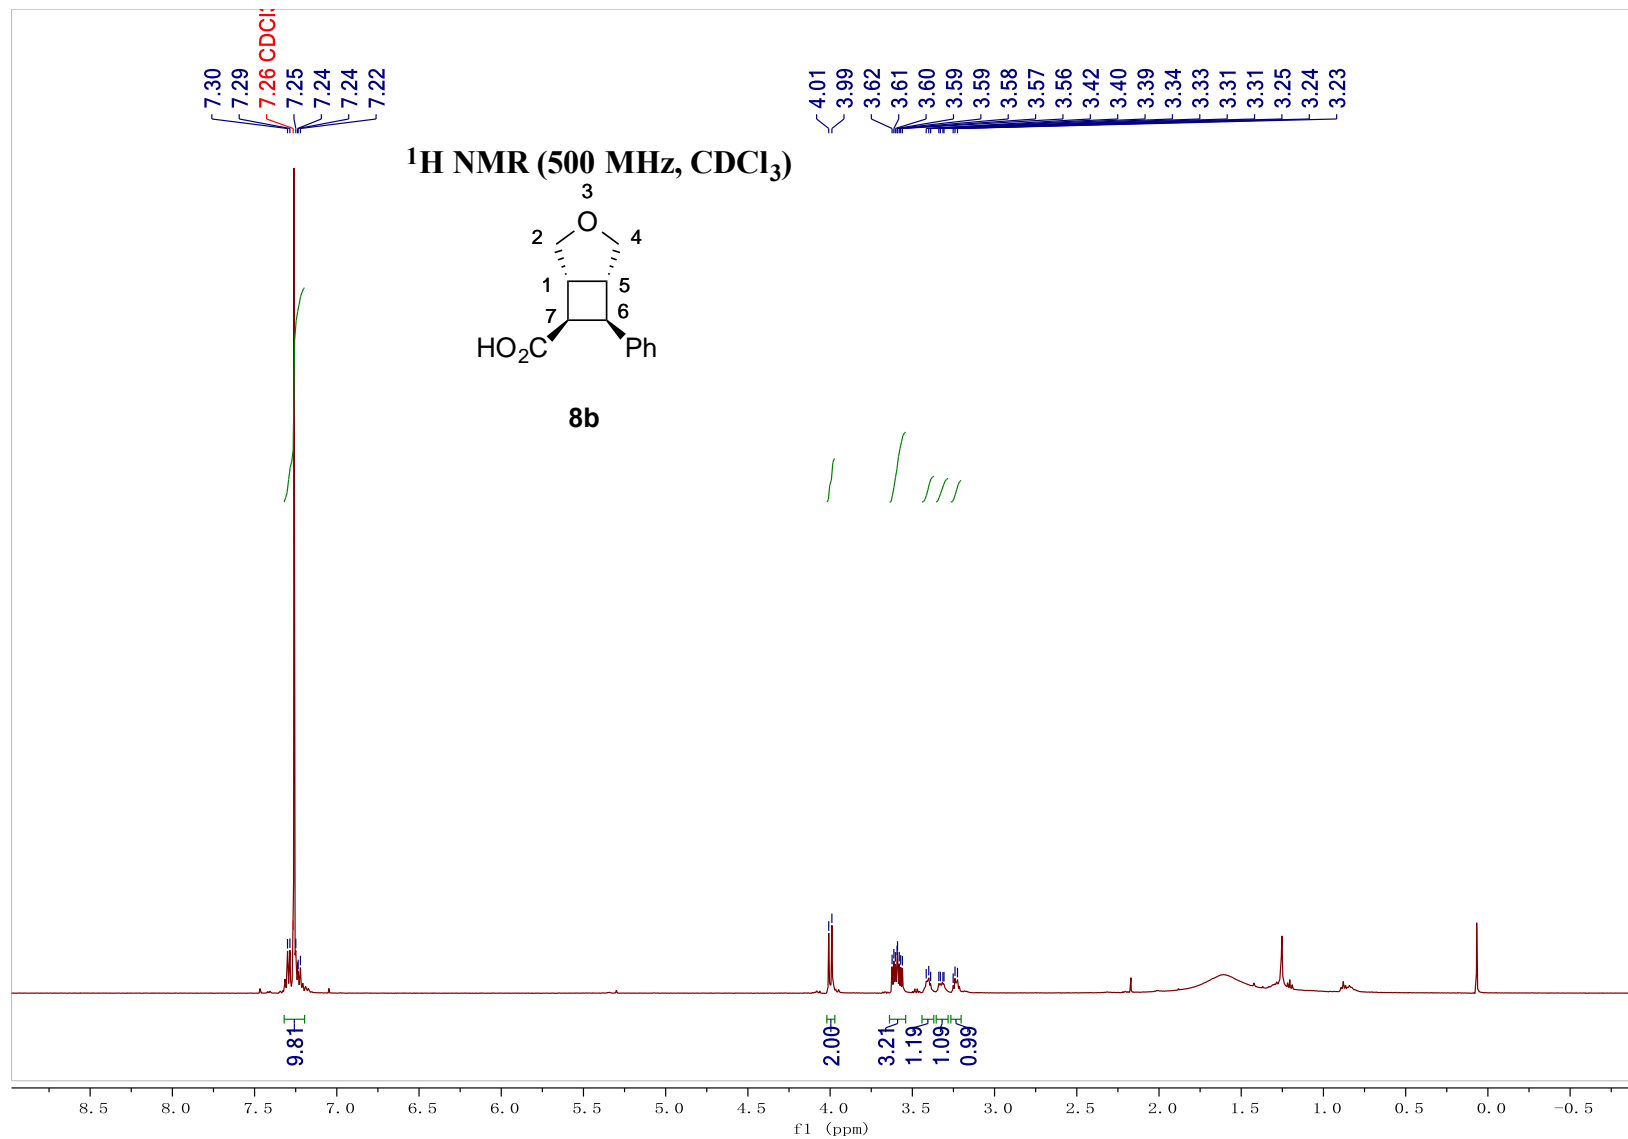

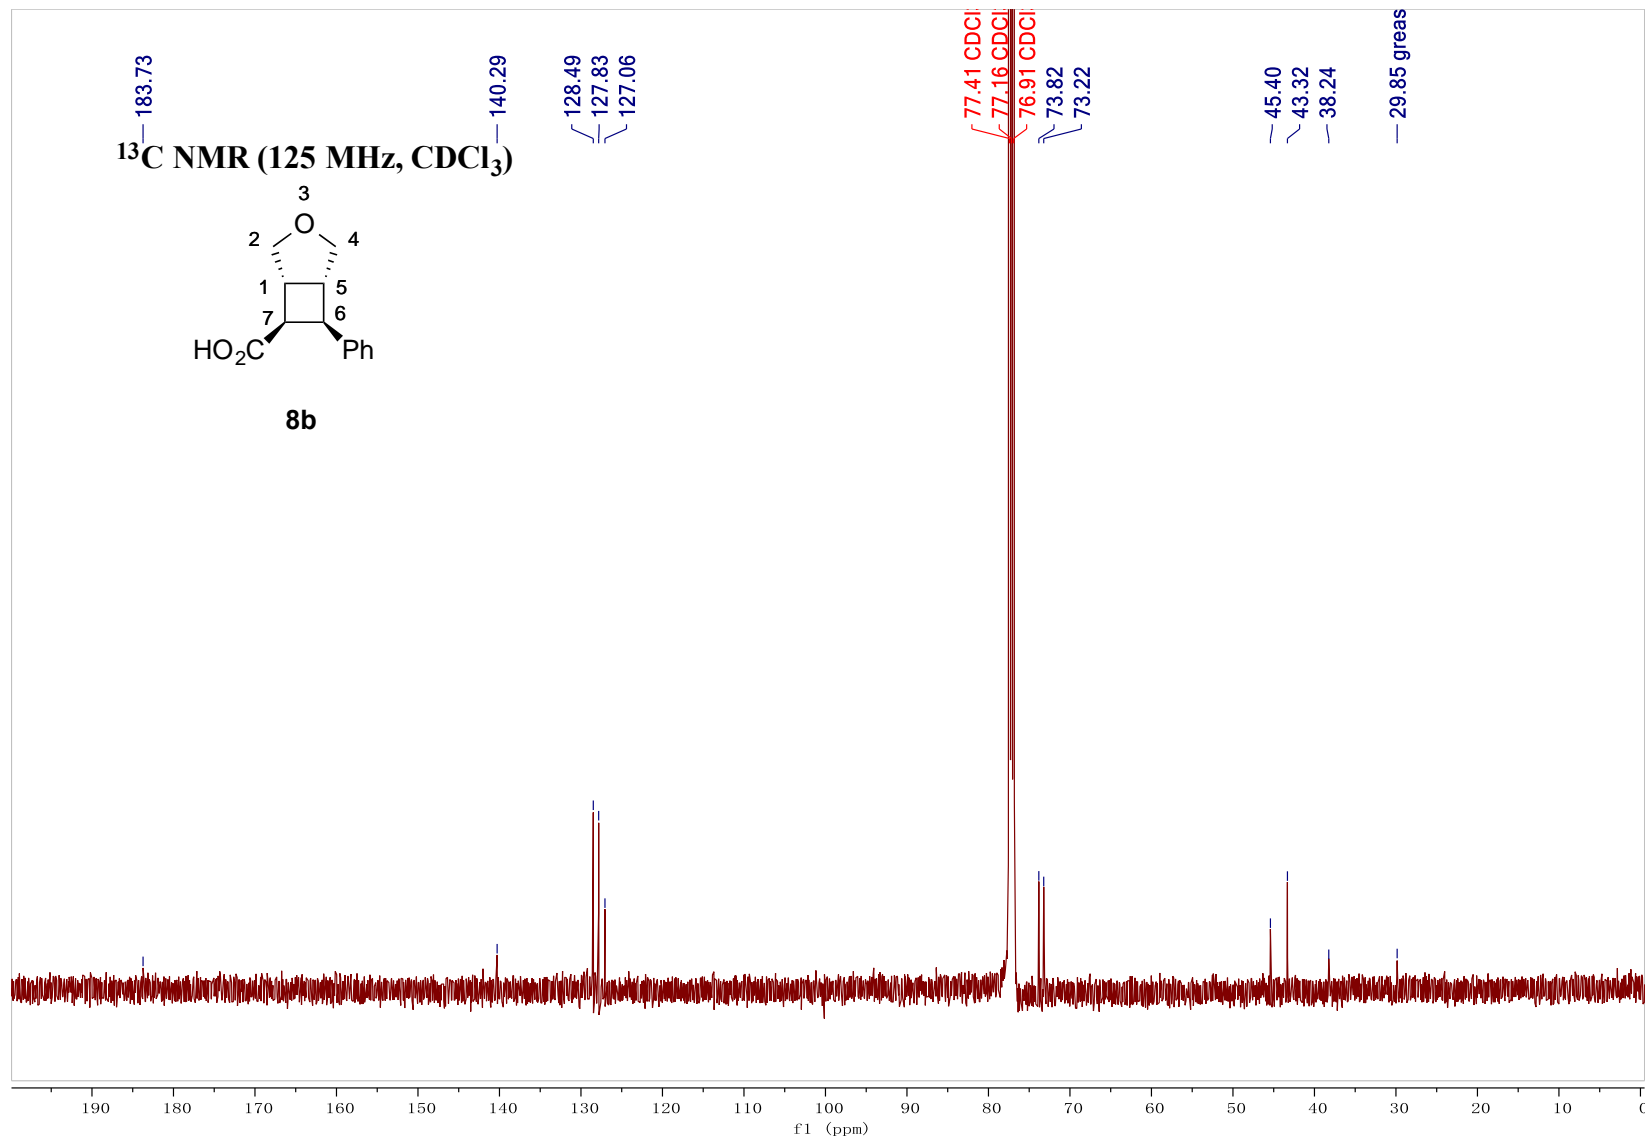

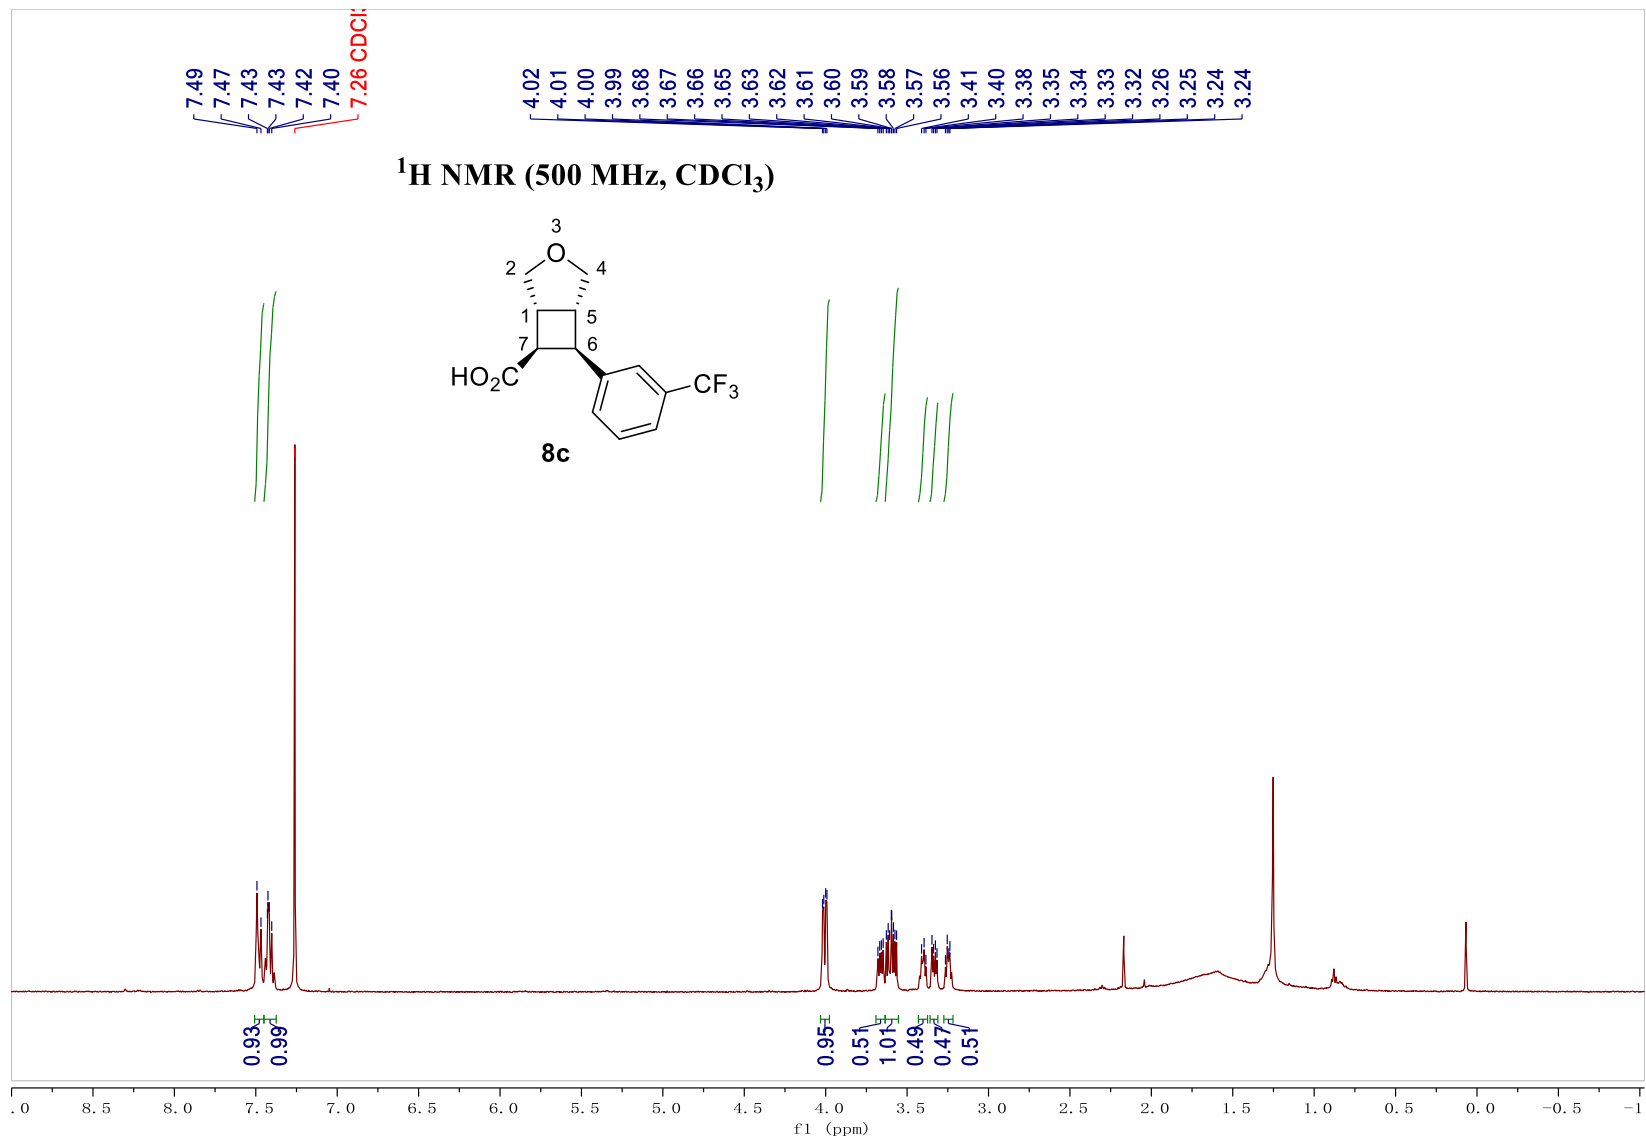

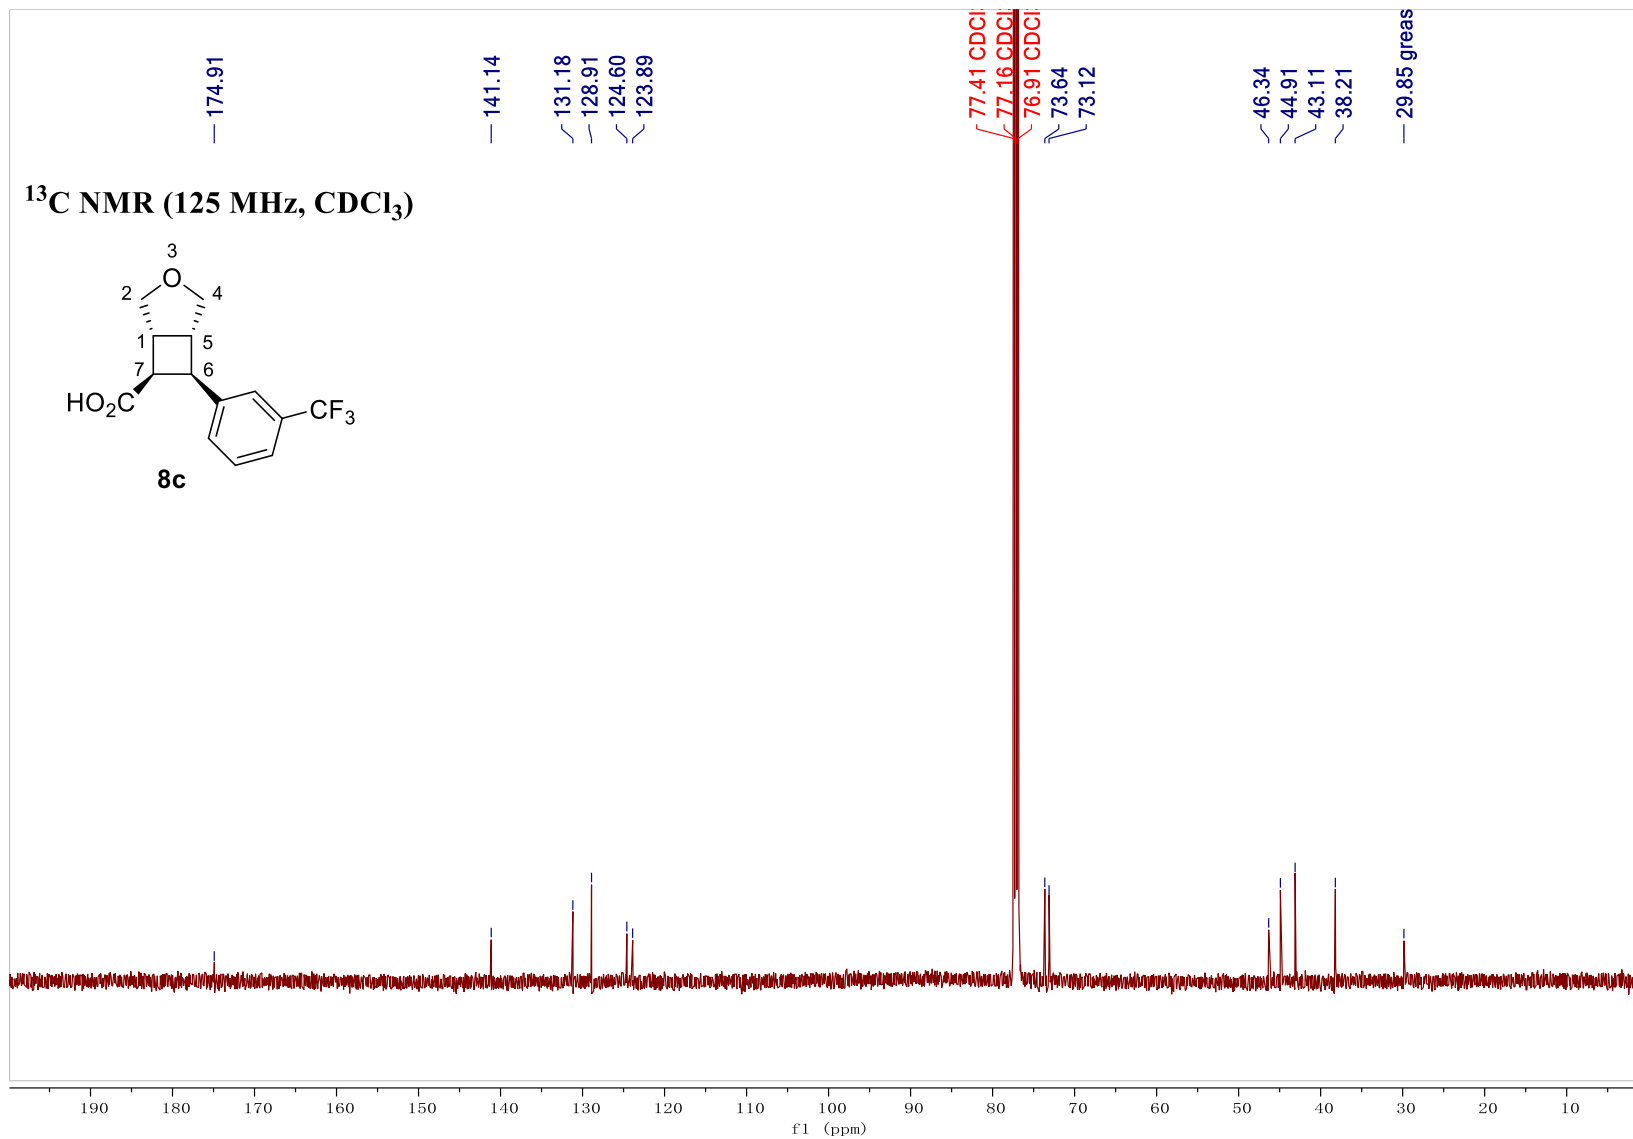

**$^1\text{H} - ^1\text{H}$  COSY - 90 (500 MHz,  $\text{CDCl}_3$ )**

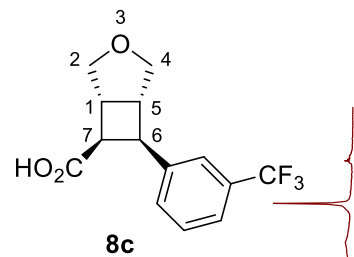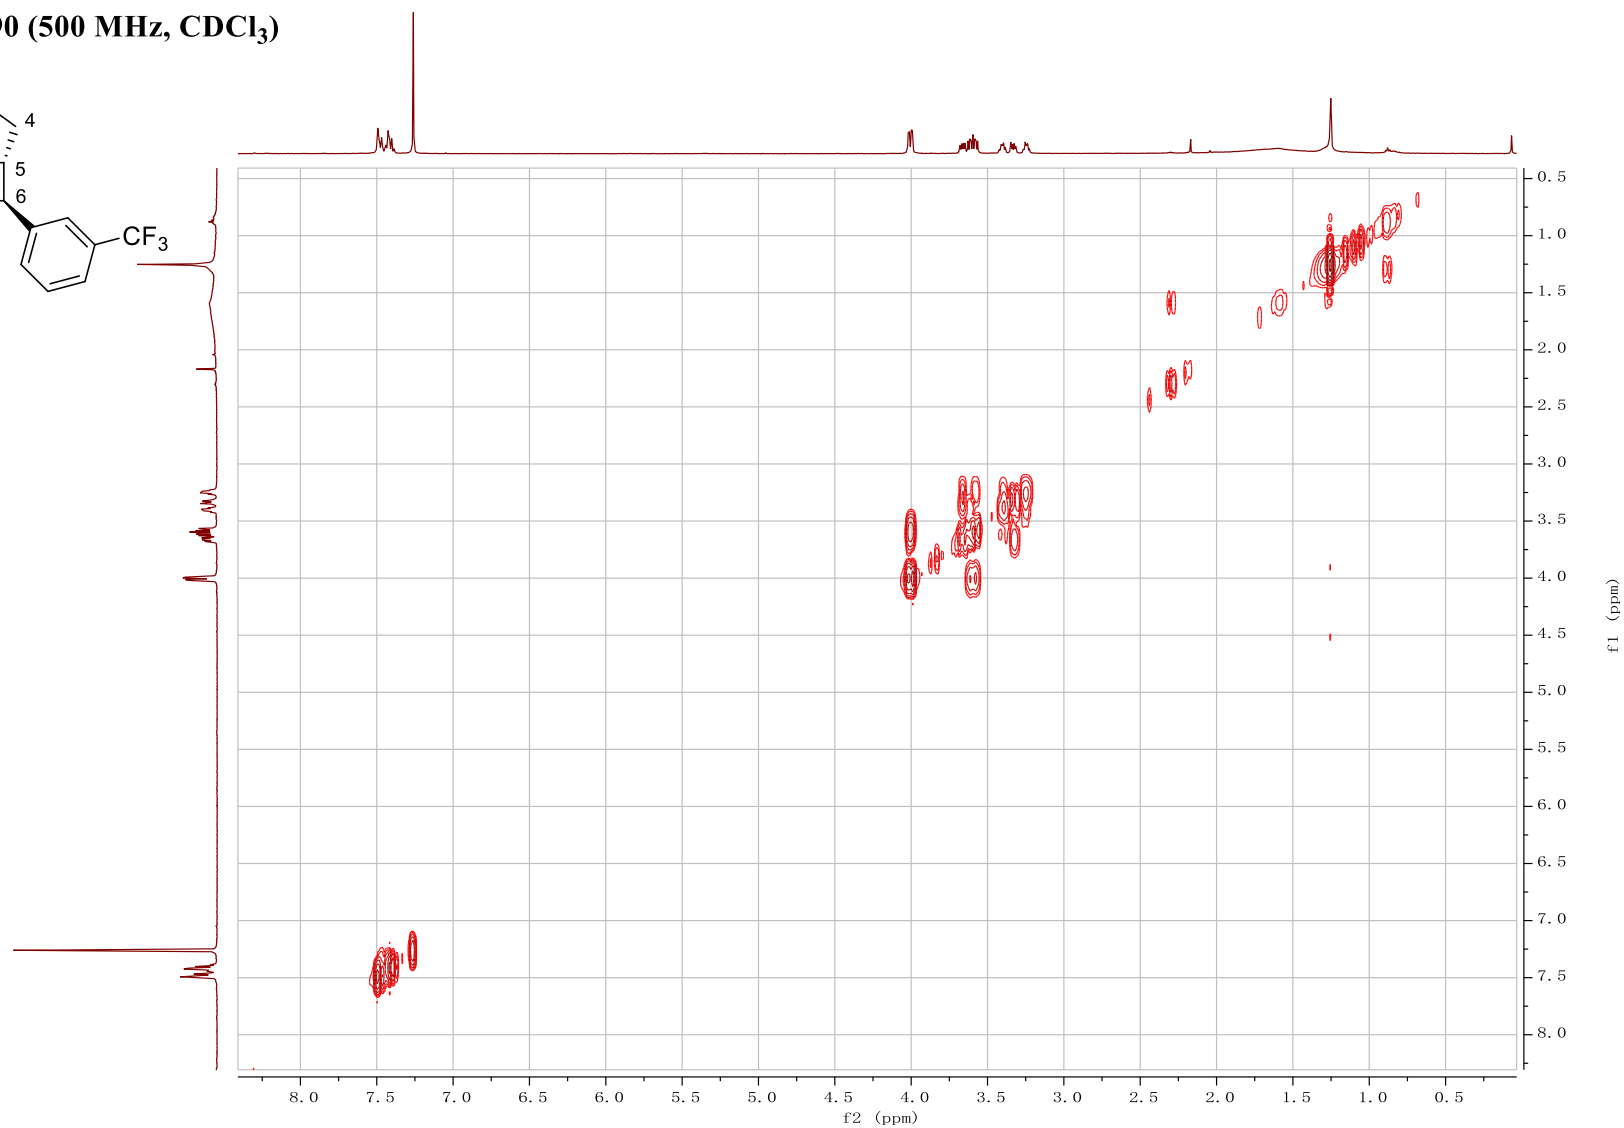



$^1\text{H}$  (500 MHz) -  $^{13}\text{C}$  (125 MHz) HSQC ( $\text{CDCl}_3$ )

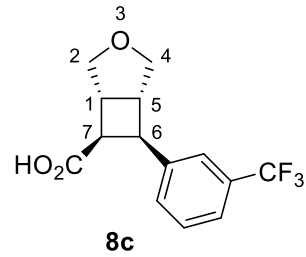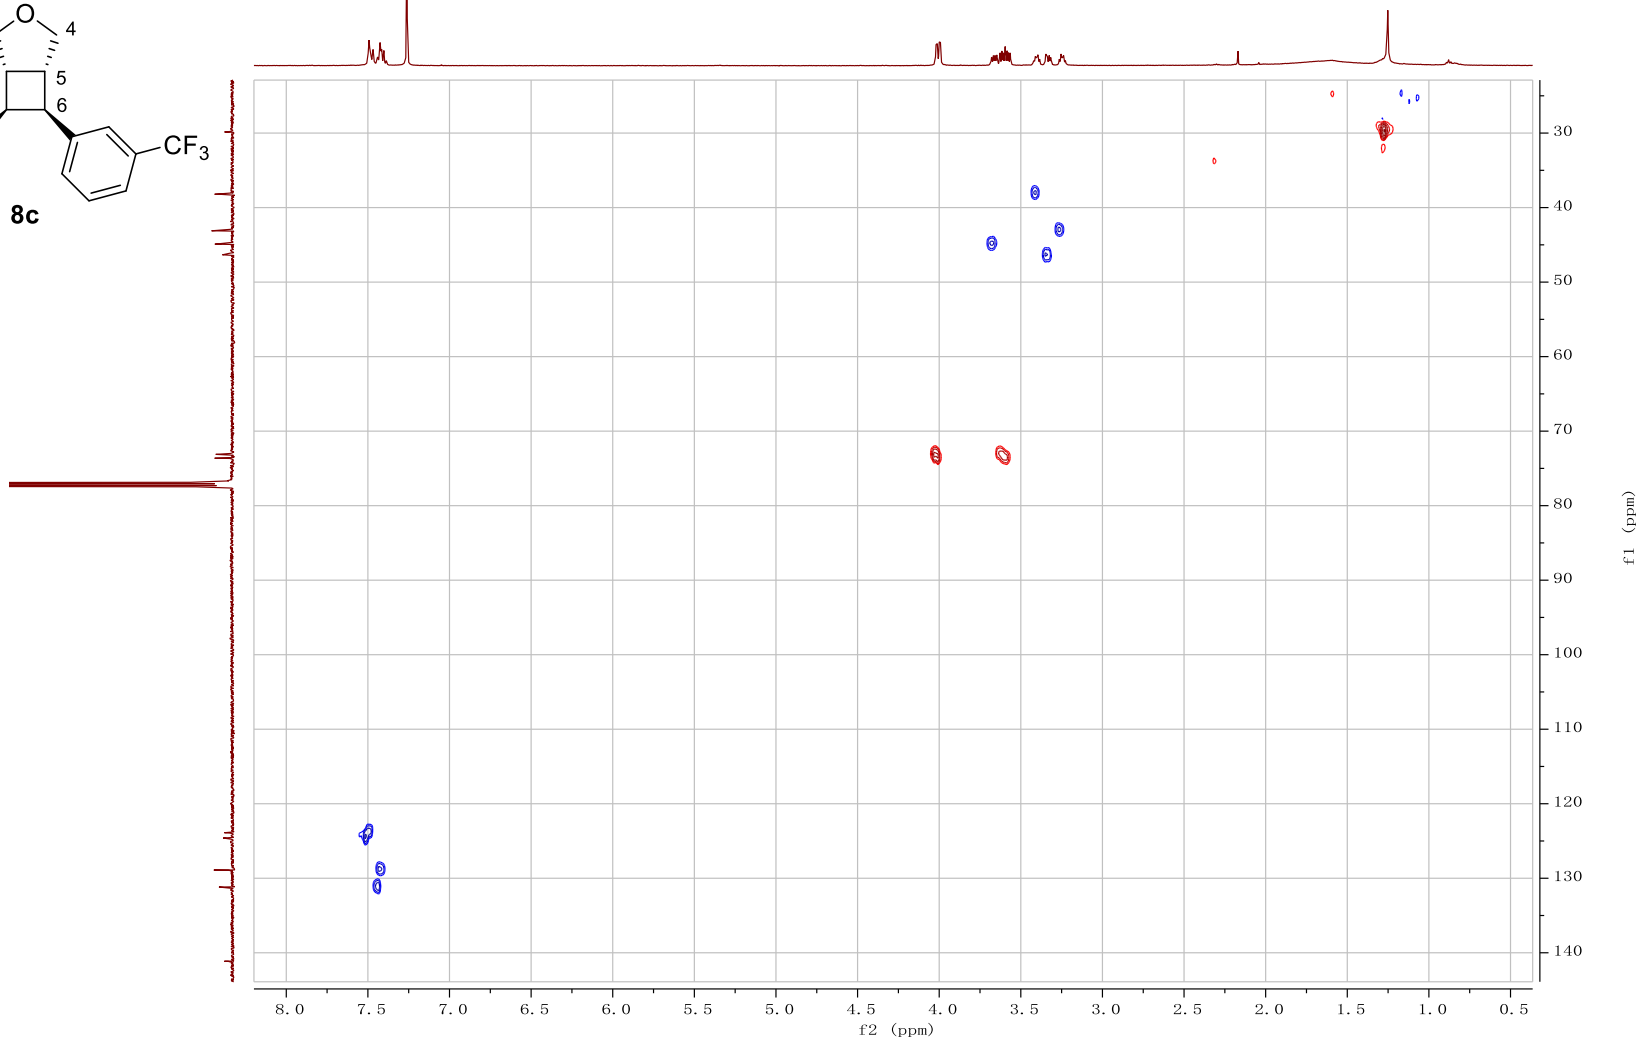

NOESY-2D (500 MHz, CDCl<sub>3</sub>)

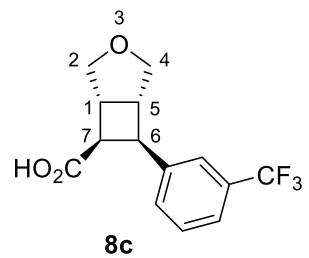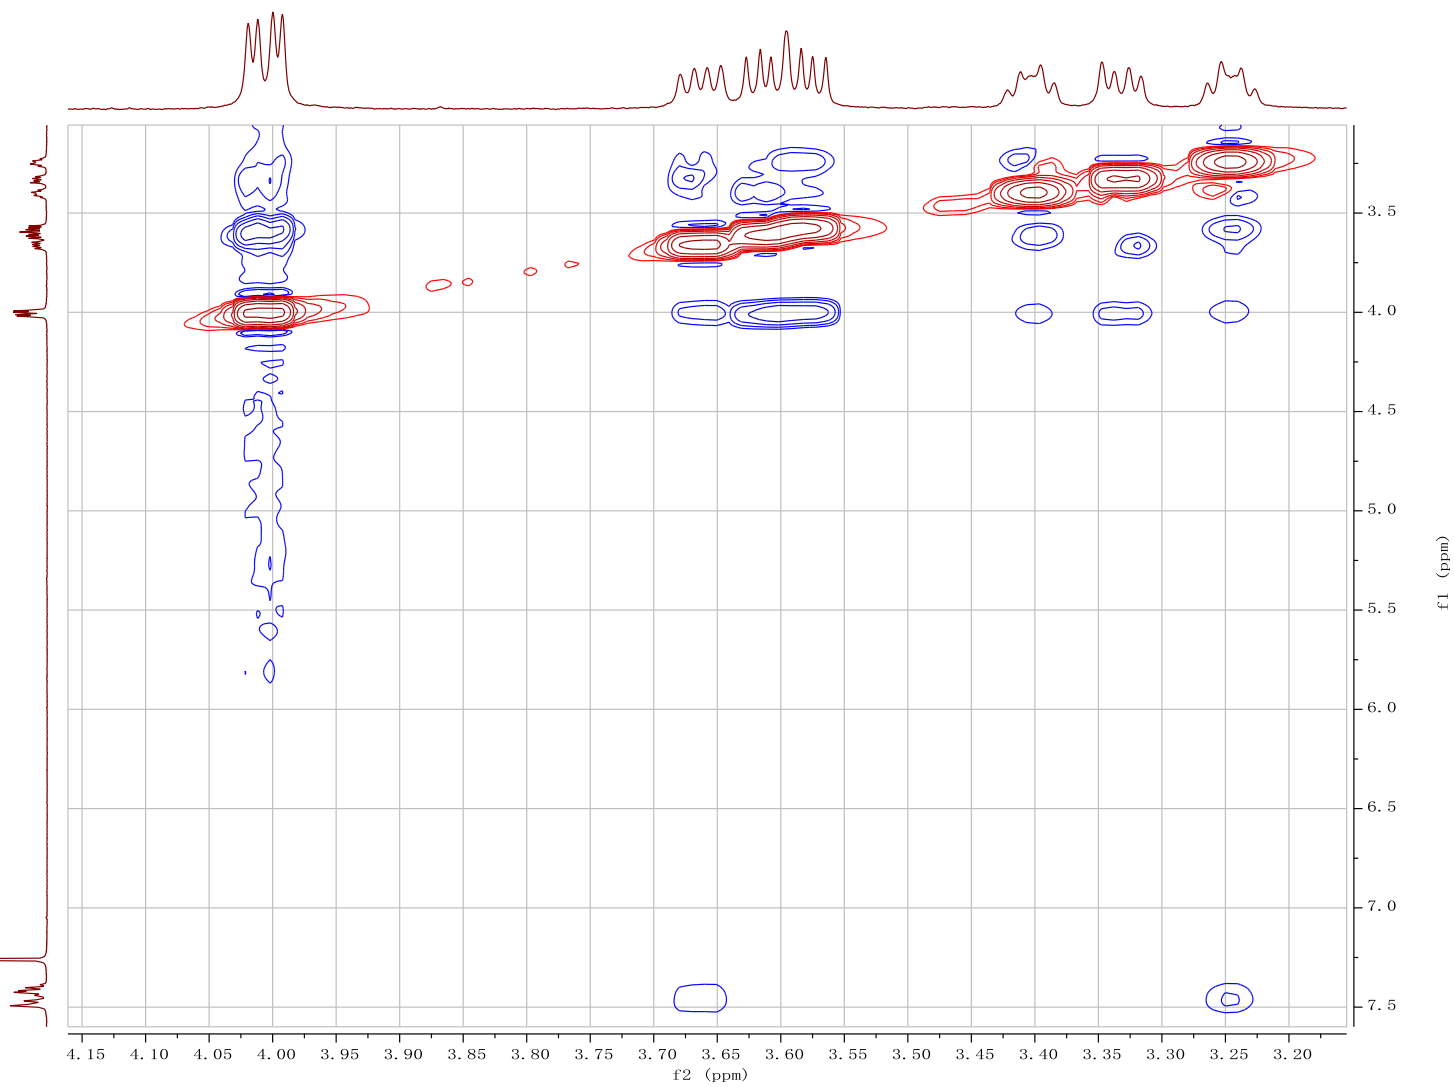

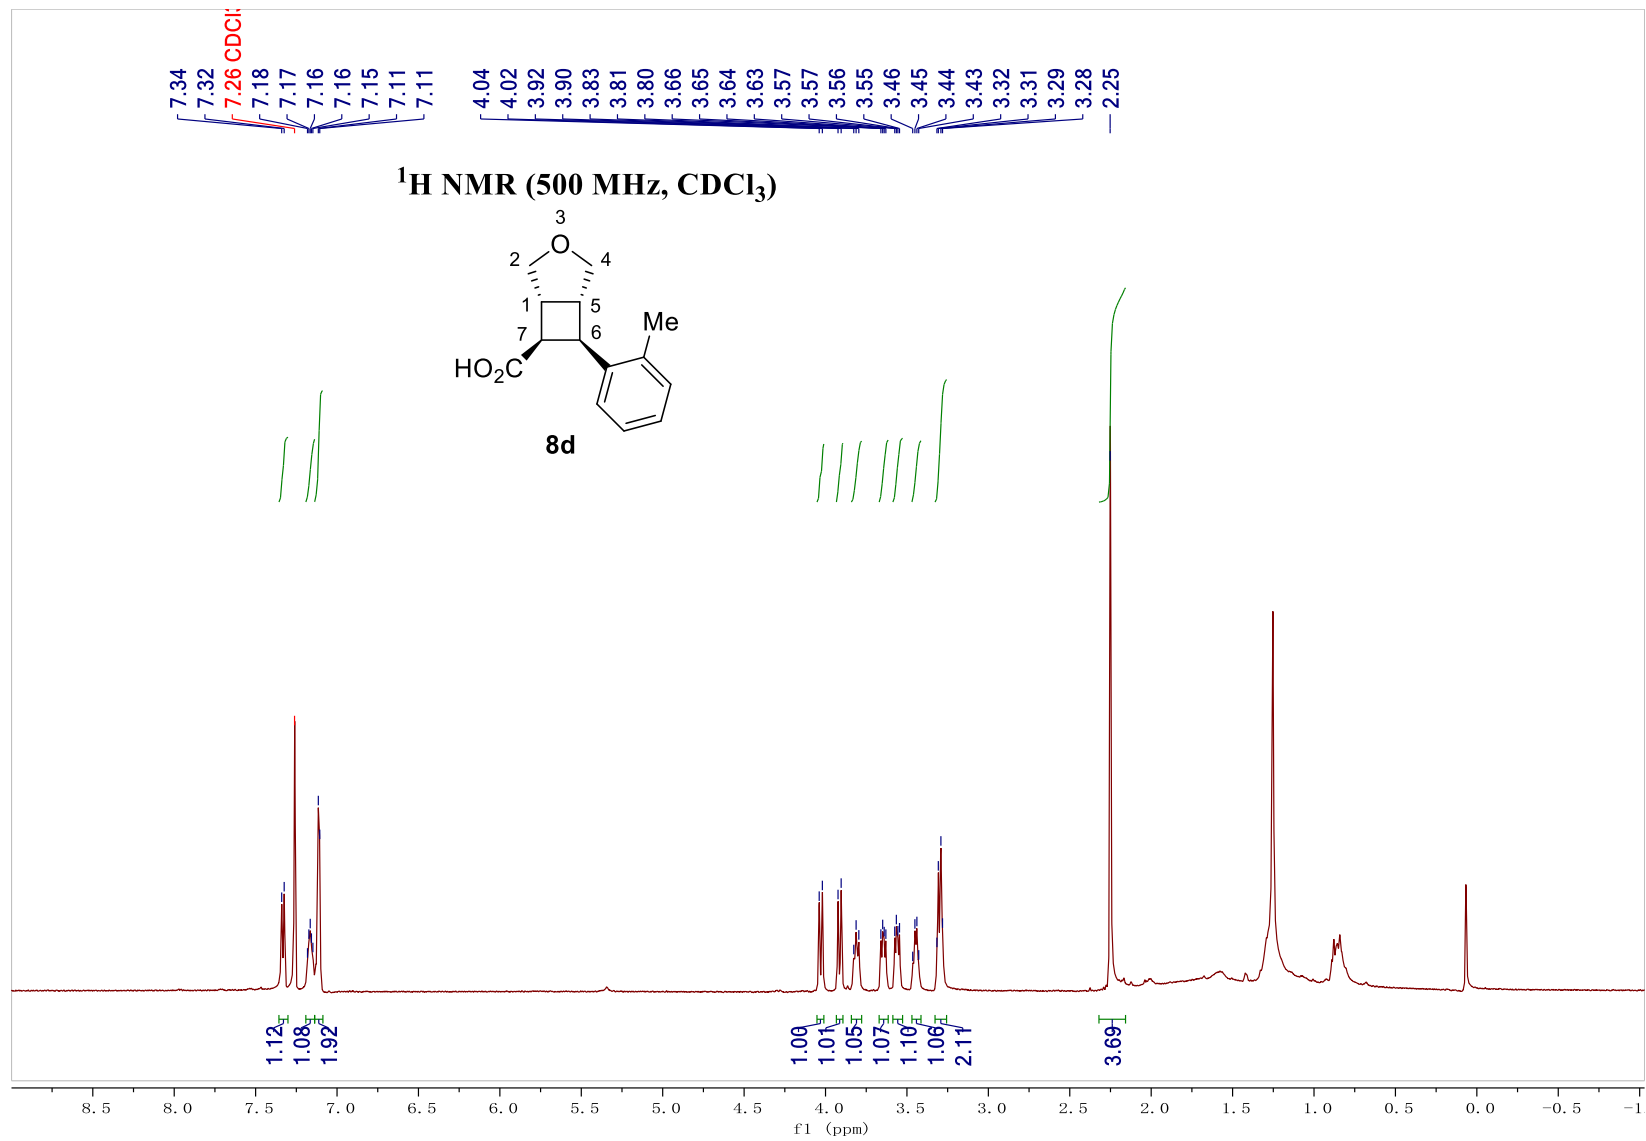

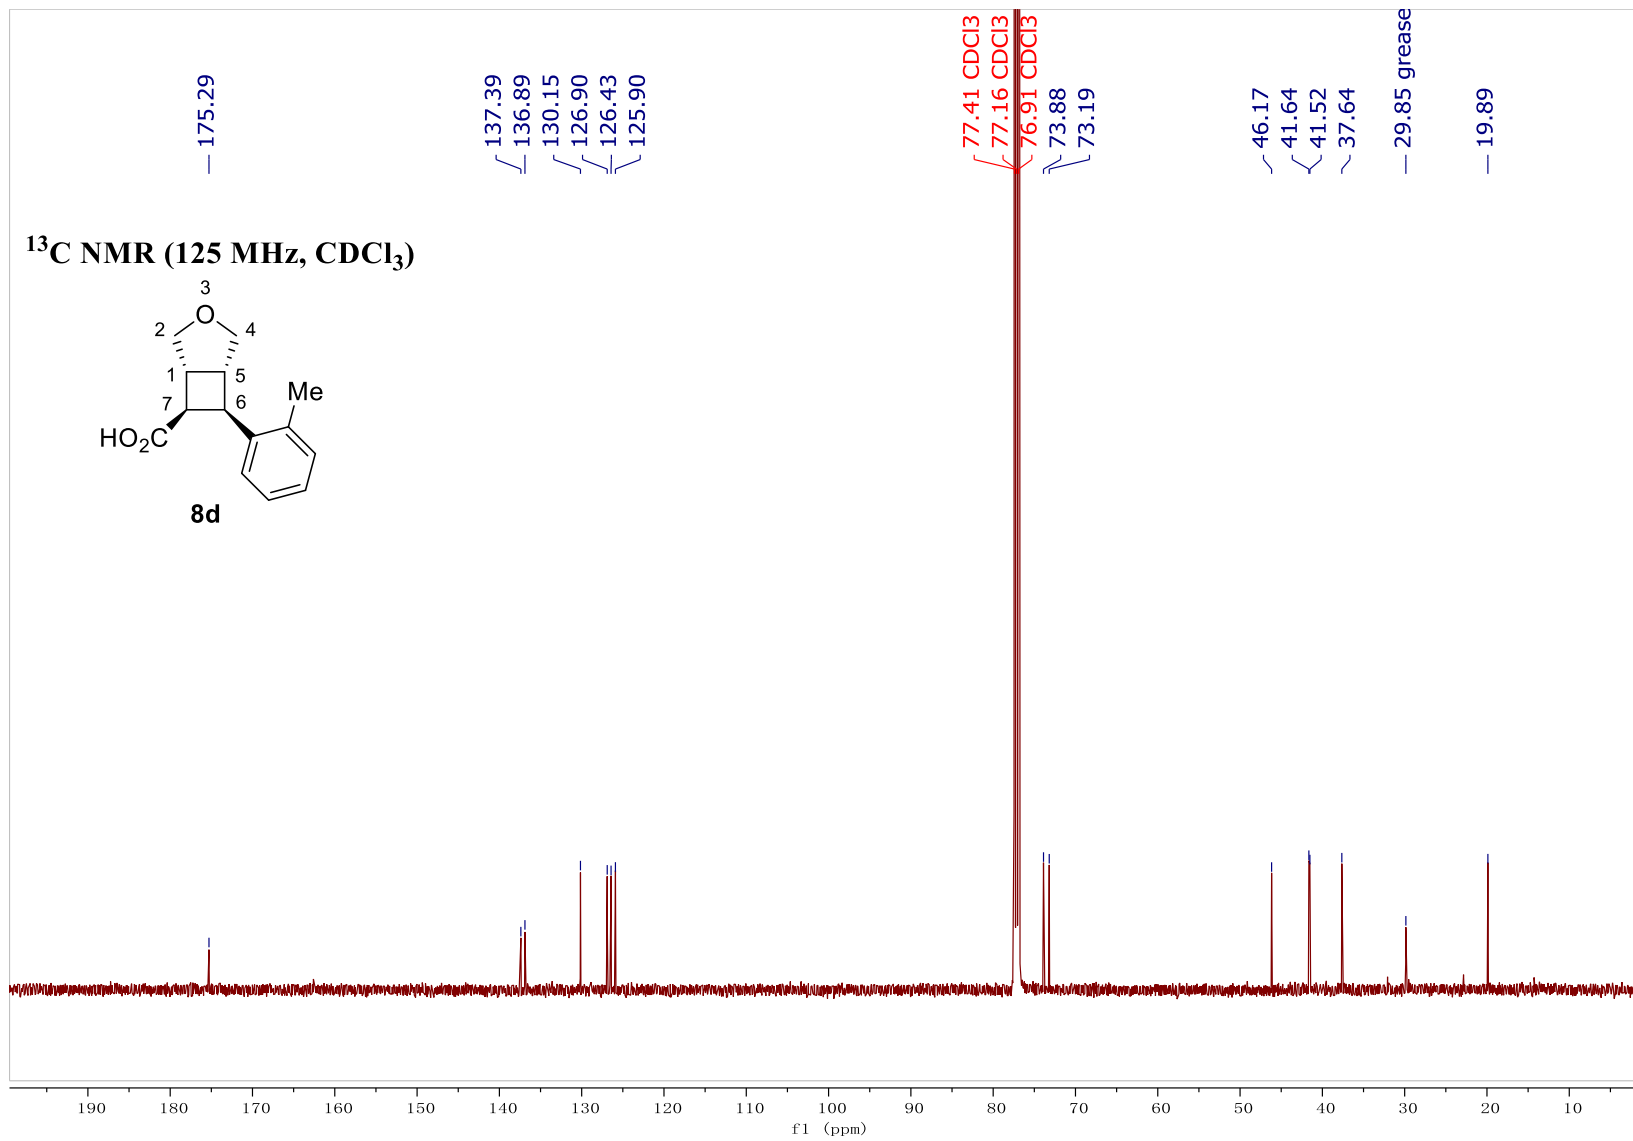

Supplement: c9cc04383g2.pdf [file c9cc04383g2.pdf]
